# Supplementary material for: BAF complexes drive proliferation and block myogenic differentiation in fusion-positive rhabdomyosarcoma
Source: Research Square preprint supplement (doi:10.21203/rs.3.rs-131009/v1), 2021-01-07
Supplement: Supplementary file 2 [file 755b669434a3454c8e530971.xlsx]

## Sheet: Fig. 1
Fig. 1F/G
Relative Viability at D12 compared to D2 after transduction
	Days after Transduction	sg_scr_1				sg_scr_2				sg_P3F_1				sg_P3F_2				sg_BRG1_1				sg_BRG1_2				sg_BAF47_1				sg_BAF47_2				sg_BRM_1				sg_BRM_2
RH4	2	100	100	100	100	100	100	100	100	100	100	100	100	100	100	100	100	100	100	100	100	100	100	100	100	100	100	100	100	100	100	100	100	100	100	100	100	100	100	100	100
RH4	12	112.5	127.4	143	85.5	117	121.8	91.23	83.07	8.3	2.6	9.95	9.38	27.3	14.9	3.77	3.04	45.9	55.6	46.6	29.6	44.9	57.6	26.1	37.89	9.18605	10.4	9.6	13.31	28.4	26.5	27.39	28.43	102.6	88.82	89.31	91.38	82.6	84.45	80.94	87.76
Group A	sg_BRG1_1	sg_BRG1_2	sg_BAF47_1	sg_BAF47_2	sg_P3F_1	sg_P3F_2	sg_scr_2	sg_BRM_1	sg_BRM_2		Gating Strategy for Fig. 1F/G
vs.	vs.	vs.	vs.	vs.	vs.	vs.	vs.	vs.	vs.
Group B	sg_scr_1	sg_scr_1	sg_scr_1	sg_scr_1	sg_scr_1	sg_scr_1	sg_scr_1	sg_scr_1	sg_scr_1
Paired t test
P value	0.0034	0.0143	0.0038	0.0057	0.0033	0.0043	0.3599	0.1725	0.0916
P value summary	**	*	**	**	**	**	ns	ns	ns
Significantly different (P < 0.05)?	Yes	Yes	Yes	Yes	Yes	Yes	No	No	No
One- or two-tailed P value?	Two-tailed	Two-tailed	Two-tailed	Two-tailed	Two-tailed	Two-tailed	Two-tailed	Two-tailed	Two-tailed
t, df	t=8.477, df=3	t=5.141, df=3	t=8.204, df=3	t=7.120, df=3	t=8.635, df=3	t=7.874, df=3	t=1.078, df=3	t=1.784, df=3	t=2.451, df=3
Number of pairs	4	4	4	4	4	4	4	4	4
How big is the difference?
Mean of differences	-72.68	-75.48	-106.5	-89.42	-109.5	-104.8	-13.83	-24.07	-33.16
SD of differences	17.15	29.36	25.96	25.12	25.37	26.63	25.65	26.99	27.06
SEM of differences	8.573	14.68	12.98	12.56	12.69	13.32	12.82	13.5	13.53
95% confidence interval	-99.96 to -45.39	-122.2 to -28.75	-147.8 to -65.17	-129.4 to -49.45	-149.9 to -69.17	-147.2 to -62.47	-54.63 to 26.98	-67.02 to 18.88	-76.22 to 9.891
R squared (partial eta squared)	0.9599	0.8981	0.9573	0.9441	0.9613	0.9538	0.2793	0.5147	0.667
How effective was the pairing?
Correlation coefficient (r)	0.7966	-0.1391	-0.7842	-0.6886	-0.2022	0.03519	0.3253	-0.2767	-0.8711
P value (one tailed)	0.1017	0.4304	0.1079	0.1557	0.3989	0.4824	0.3373	0.3616	0.0644
P value summary	ns	ns	ns	ns	ns	ns	ns	ns	ns
Was the pairing significantly effective?	No	No	No	No	No	No	No	No	No
Fig. 1H																			same samples loaded again
merged raw image (* indicates corrsponding unmerged raw image)											long exposure								merged raw image (* indicates corrsponding unmerged raw image)
Fig. 1I																							Gating Strategy for Fig. 1F/G
Cell cycle phase distribution 7d after transduction	G1							S							G2/M
	sgscr 1	sgBRM_1	sgBRM_2	sgBRG1_1	sgBRG1_2	sgBAF47_1	sgBAF47_2	sgscr 1	sgBRM_1	sgBRM_2	sgBRG1_1	sgBRG1_2	sgBAF47_1	sgBAF47_2	sgscr 1	sgBRM_1	sgBRM_2	sgBRG1_1	sgBRG1_2	sgBAF47_1	sgBAF47_2
	42.5	40.8	41.3	47.3	46.7	56.2	50.4	32.7	34.5	32.9	27.9	26.8	21.8	25	22.2	22.5	22.9	22.5	23.5	20.2	22.1
	48.4	50.1	47.8	59.4	63.7	70.2	73	30.3	28.4	31.8	20.9	17.8	16	12.3	19	19	18	18	16	12	13
	46	44.8	41.9	52.6	56.3	64.8	57.7	31.4	30.9	34.7	25.4	22.4	17.8	22.5	20.8	22.1	21.2	20.1	19.3	15.3	17.9
	46.5	42.7	45	51.5	55.4	64.7	59.2	29.7	32.3	31.1	25	23.1	17.8	21.4	21.7	22.6	21.9	21.8	19.3	15.2	17.5
	G1							S							G2/M
Group A	sgBRM_1	sgBRM_2	sgBRG1_1	sgBRG1_2	sgSMARCB1_1	sgSMARCB1_2		sgBRM_1	sgBRM_2	sgBRG1_1	sgBRG1_2	sgSMARCB1_1	sgSMARCB1_2		sgBRM_1	sgBRM_2	sgBRG1_1	sgBRG1_2	sgSMARCB1_1	sgSMARCB1_2
vs.	vs.	vs.	vs.	vs.	vs.	vs.		vs.	vs.	vs.	vs.	vs.	vs.		vs.	vs.	vs.	vs.	vs.	vs.
Group B	sgscr 1	sgscr 1	sgscr 1	sgscr 1	sgscr 1	sgscr 1		sgscr 1	sgscr 1	sgscr 1	sgscr 1	sgscr 1	sgscr 1		sgscr 1	sgscr 1	sgscr 1	sgscr 1	sgscr 1	sgscr 1
Paired t test
P value	0.3505	0.0965	0.0177	0.0241	0.0017	0.0291		0.6622	0.0874	0.0109	0.0107	0.0005	0.0218		0.1223	0.8534	0.374	0.2375	0.0187	0.0765
P value summary	ns	ns	*	*	**	*		ns	ns	*	*	***	*		ns	ns	ns	ns	*	ns
Significantly different (P < 0.05)?	No	No	Yes	Yes	Yes	Yes		No	No	Yes	Yes	Yes	Yes		No	No	No	No	Yes	No
One- or two-tailed P value?	Two-tailed	Two-tailed	Two-tailed	Two-tailed	Two-tailed	Two-tailed		Two-tailed	Two-tailed	Two-tailed	Two-tailed	Two-tailed	Two-tailed		Two-tailed	Two-tailed	Two-tailed	Two-tailed	Two-tailed	Two-tailed
t, df	t=1.103, df=3	t=2.393, df=3	t=4.754, df=3	t=4.236, df=3	t=10.84, df=3	t=3.941, df=3		t=0.4830, df=3	t=2.504, df=3	t=5.665, df=3	t=5.707, df=3	t=16.31, df=3	t=4.400, df=3		t=2.136, df=3	t=0.2012, df=3	t=1.042, df=3	t=1.472, df=3	t=4.657, df=3	t=2.658, df=3
Number of pairs	4	4	4	4	4	4		4	4	4	4	4	4		4	4	4	4	4	4
How big is the difference?
Mean of differences	-1.25	-1.85	6.85	9.675	18.13	14.23		0.5	1.6	-6.225	-8.5	-12.68	-10.73		0.625	0.075	-0.325	-1.4	-5.25	-3.3
SD of differences	2.266	1.546	2.882	4.568	3.344	7.219		2.07	1.278	2.198	2.979	1.554	4.875		0.5852	0.7455	0.6238	1.903	2.255	2.483
SEM of differences	1.133	0.773	1.441	2.284	1.672	3.61		1.035	0.639	1.099	1.489	0.7771	2.437		0.2926	0.3728	0.3119	0.9513	1.127	1.242
95% confidence interval	-4.856 to 2.356	-4.310 to 0.6100	2.265 to 11.44	2.406 to 16.94	12.80 to 23.45	2.738 to 25.71		-2.795 to 3.795	-0.4336 to 3.634	-9.722 to -2.728	-13.24 to -3.760	-15.15 to -10.20	-18.48 to -2.968		-0.3062 to 1.556	-1.111 to 1.261	-1.318 to 0.6677	-4.428 to 1.628	-8.838 to -1.662	-7.251 to 0.6514
R squared (partial eta squared)	0.2886	0.6563	0.8828	0.8567	0.9751	0.8381		0.07215	0.6764	0.9145	0.9157	0.9888	0.8658		0.6033	0.01331	0.2657	0.4193	0.8785	0.7019
How effective was the pairing?
Correlation coefficient (r)	0.8621	0.8588	0.9282	0.9817	0.9954	0.9251		0.5914	0.6207	0.695	0.6683	0.8245	0.5942		0.9484	0.9914	0.9942	0.902	0.8761	0.9214
P value (one tailed)	0.0689	0.0706	0.0359	0.0092	0.0023	0.0374		0.2043	0.1896	0.1525	0.1659	0.0877	0.2029		0.0258	0.0043	0.0029	0.049	0.0619	0.0393
P value summary	ns	ns	*	**	**	*		ns	ns	ns	ns	ns	ns		*	**	**	*	ns	*
Was the pairing significantly effective?	No	No	Yes	Yes	Yes	Yes		No	No	No	No	No	No		Yes	Yes	Yes	Yes	No	Yes

## Sheet: Fig.2
Fig. 2C left
merged raw image (* indicates corrsponding unmerged raw image)						long exposure
Fig. 2C right
merged raw image (* indicates corrsponding unmerged raw image)												long exposure
Fig. 2D						Fig. 2E

## Sheet: Fig. 3
Fig. 3E
	Relative Expression levels 7d after transduction							Corresponding dCt Values = Ct(target)-Ct(GAPDH)							Statistics based on dCt Values	MYL1				MYH3				MYH4				MYH8				TNNC2				TNNT3				CKM
		sg_scr	sg_BRG1_1	sg_BRG1_2	sg_BAF47_1	sg_BAF47_2		Biol. Rep.	sg_scr	sg_BRG1_1	sg_BRG1_2	sg_BAF47_1	sg_BAF47_2		Column A	sg_BRG1_1	sg_BRG1_2	sg_BAF47_1	sg_BAF47_2	sg_BRG1_1	sg_BRG1_2	sg_BAF47_1	sg_BAF47_2	sg_BRG1_1	sg_BRG1_2	sg_BAF47_1	sg_BAF47_2	sg_BRG1_1	sg_BRG1_2	sg_BAF47_1	sg_BAF47_2	sg_BRG1_1	sg_BRG1_2	sg_BAF47_1	sg_BAF47_2	sg_BRG1_1	sg_BRG1_2	sg_BAF47_1	sg_BAF47_2	sg_BRG1_1	sg_BRG1_2	sg_BAF47_1	sg_BAF47_2
MYL1	Mean	100	17103	29966.6	10991.8	13757.5	MYL1	N1	13.93	8.06	7.43	8.42	7.07		vs.	vs.	vs.	vs.	vs.	vs.	vs.	vs.	vs.	vs.	vs.	vs.	vs.	vs.	vs.	vs.	vs.	vs.	vs.	vs.	vs.	vs.	vs.	vs.	vs.	vs.	vs.	vs.	vs.
	Upper Limit	228.7	19078	37164.3	12007.3	27190.1		N2	16.12	7.8	6.91	8.66	8.87		Column B	sg_scr	sg_scr	sg_scr	sg_scr	sg_scr	sg_scr	sg_scr	sg_scr	sg_scr	sg_scr	sg_scr	sg_scr	sg_scr	sg_scr	sg_scr	sg_scr	sg_scr	sg_scr	sg_scr	sg_scr	sg_scr	sg_scr	sg_scr	sg_scr	sg_scr	sg_scr	sg_scr	sg_scr
	Lower Limit	43.7	15332.4	24162.9	10062.3	6960.9		N3	15.85	7.78	6.87	8.47	8.64
MYH3	Mean	100	850	1212.2	959.2	1098.7	MYH3	N1	11.46	8.93	7.49	7.5	7.96		Paired t test
	Upper Limit	216.8	1743.5	3122.2	2768.3	2668.3		N2	12.45	8.68	8.67	9.27	8.53		P value	0.0108	0.0109	0.0087	0.0003	0.0025	0.0006	0.0009	0.0005	0.0024	0.0167	0.0108	0.0002	0.0011	0.0014	0.0028	0.0091	0.0023	0.0012	0.0006	0.0011	0.0022	0.0028	0.0002	0.0261	0.0079	0.0038	0.0172	0.0064
	Lower Limit	46.1	414.4	470.6	332.3	452.4		N3	14.1	10.56	10.35	11.03	10.56		P value summary	*	*	**	***	**	***	***	***	**	*	*	***	**	**	**	**	**	**	***	**	**	**	***	*	**	**	*	**
								N4	13.15	10.62	10.24	10.3	10.26		Significantly different (P < 0.05)?	Yes	Yes	Yes	Yes	Yes	Yes	Yes	Yes	Yes	Yes	Yes	Yes	Yes	Yes	Yes	Yes	Yes	Yes	Yes	Yes	Yes	Yes	Yes	Yes	Yes	Yes	Yes	Yes
MYH4	Mean	100	517.3	1488.2	2477.5	1211	MYH4	N1	20.53	18.19	15.66	16.43	17.01		One- or two-tailed P value?	Two-tailed	Two-tailed	Two-tailed	Two-tailed	Two-tailed	Two-tailed	Two-tailed	Two-tailed	Two-tailed	Two-tailed	Two-tailed	Two-tailed	Two-tailed	Two-tailed	Two-tailed	Two-tailed	Two-tailed	Two-tailed	Two-tailed	Two-tailed	Two-tailed	Two-tailed	Two-tailed	Two-tailed	Two-tailed	Two-tailed	Two-tailed	Two-tailed
	Upper Limit	155.1	781.8	4126.2	4446.3	1808.5		N2	21.73	19.14	18.06	17.54	18.15		t, df	t=9.533, df=2	t=9.487, df=2	t=10.65, df=2	t=57.37, df=2	t=9.424, df=3	t=15.27, df=3	t=13.51, df=3	t=16.26, df=3	t=20.34, df=2	t=7.651, df=2	t=9.533, df=2	t=68.03, df=2	t=30.50, df=2	t=27.16, df=2	t=18.73, df=2	t=10.39, df=2	t=9.715, df=3	t=12.03, df=3	t=15.25, df=3	t=12.67, df=3	t=21.36, df=2	t=18.76, df=2	t=74.95, df=2	t=6.068, df=2	t=11.18, df=2	t=16.18, df=2	t=7.531, df=2	t=12.45, df=2
	Lower Limit	64.5	342.3	536.8	1380.4	810.9		N3	21.48	19.29	18.33	15.88	17.78		Number of pairs	3	3	3	3	4	4	4	4	3	3	3	3	3	3	3	3	4	4	4	4	3	3	3	3	3	3	3	3
MYH8	Mean	100	1418.2	2867.6	2098.7	1498	MYH8	N1	10.53	6.74	5.33	6.56	5.88
	Upper Limit	137.7	1914.5	4874.1	2565.5	3236		N2	11.41	7.35	6.74	6.98	7.95		How big is the difference?
	Lower Limit	72.6	1050.5	1687.1	1716.9	693.5		N3	11.21	7.58	6.55	6.43	7.61		Mean of differences	-7.42	-8.23	-6.783	-7.107	-3.093	-3.603	-3.265	-3.463	-2.373	-3.897	-4.63	-3.6	-3.827	-4.843	-4.393	-3.903	-2.53	-2.62	-2.345	-2.445	-2.593	-3.193	-2.383	-2.393	-4.567	-5.43	-5.623	-5.103
TNNC2	Mean	100	578.3	616.2	508.4	545.7	TNNC2	N1	8.24	6.29	6.15	6.32	5.79		SD of differences	1.348	1.503	1.103	0.2146	0.6563	0.4718	0.4832	0.426	0.2021	0.8821	0.8412	0.09165	0.2173	0.3089	0.4062	0.6504	0.5208	0.4357	0.3075	0.3859	0.2103	0.2948	0.05508	0.6831	0.7077	0.5813	1.293	0.7101
	Upper Limit	232.9	1058.8	1152.3	966.9	1304.2		N2	10.12	7.14	7.1	7.61	7.31		SEM of differences	0.7784	0.8675	0.6371	0.1239	0.3281	0.2359	0.2416	0.213	0.1167	0.5093	0.4857	0.05292	0.1255	0.1784	0.2345	0.3755	0.2604	0.2178	0.1538	0.1929	0.1214	0.1702	0.0318	0.3944	0.4086	0.3356	0.7467	0.41
	Lower Limit	42.9	315.9	329.5	267.3	228.3		N3	11.14	8.18	8.21	8.52	8.53		95% confidence interval	-10.77 to -4.071	-11.96 to -4.497	-9.524 to -4.042	-7.640 to -6.574	-4.137 to -2.048	-4.353 to -2.852	-4.034 to -2.496	-4.140 to -2.785	-2.875 to -1.871	-6.088 to -1.705	-6.720 to -2.540	-3.828 to -3.372	-4.367 to -3.287	-5.611 to -4.076	-5.402 to -3.384	-5.519 to -2.288	-3.359 to -1.701	-3.313 to -1.927	-2.834 to -1.856	-3.059 to -1.831	-3.116 to -2.071	-3.926 to -2.461	-2.520 to -2.247	-4.090 to -0.6964	-6.325 to -2.809	-6.874 to -3.986	-8.836 to -2.411	-6.867 to -3.339
								N4	10.25	8.02	7.81	7.92	8.34		R squared (partial eta squared)	0.9785	0.9783	0.9827	0.9994	0.9673	0.9873	0.9838	0.9888	0.9952	0.967	0.9785	0.9996	0.9979	0.9973	0.9943	0.9818	0.9692	0.9797	0.9873	0.9817	0.9956	0.9943	0.9996	0.9485	0.9842	0.9924	0.9659	0.9873
TNNT3	Mean	100	605	915.3	523.1	525.6	TNNT3	N1	9.52	7.13	6.66	7.11	6.34
	Upper Limit	295.4	1639.4	2275.2	1551.3	2466		N2	11.63	8.82	8.21	9.31	9.58		How effective was the pairing?
	Lower Limit	33.8	223.2	368.2	176.4	112		N3	12.57	9.99	9.27	10.15	10.62		Correlation coefficient (r)	-0.9843	-0.9843	0.7417	1	0.8163	0.9479	0.9823	0.9455	0.9477	0.958	0.3812	0.9922	0.8839	0.9956	0.4917	0.9979	0.9286	0.959	0.9955	0.9518	0.9936	0.994	0.9994	0.9975	0.9884	0.9978	0.8859	0.999
CKM	Mean	100	2372.3	4305.9	4909.7	3426.6	CKM	N1	11.36	7.61	6.6	7.23	7.07		P value (one tailed)	0.0565	0.0565	0.234	0.0014	0.0919	0.0261	0.0089	0.0272	0.1034	0.0925	0.3755	0.0398	0.1549	0.0299	0.3364	0.0206	0.0357	0.0205	0.0023	0.0241	0.0361	0.035	0.0111	0.0225	0.0485	0.0209	0.1536	0.0141
	Upper Limit	329.3	4882.7	9546.9	6982.8	6898.7		N2	14.61	9.66	8.81	8.23	9.01		P value summary	ns	ns	ns	**	ns	*	**	*	ns	ns	ns	*	ns	*	ns	*	*	*	**	*	*	*	*	*	*	*	ns	*
	Lower Limit	30.4	1152.6	1942.1	3452.1	1702		N3	13.96	8.96	8.23	7.6	8.54		Was the pairing significantly effective?	No	No	No	Yes	No	Yes	Yes	Yes	No	No	No	Yes	No	Yes	No	Yes	Yes	Yes	Yes	Yes	Yes	Yes	Yes	Yes	Yes	Yes	No	Yes
	Relative Expression levels 7d after transduction					Corresponding dCt Values = Ct(target)-Ct(GAPDH)									Statistics based on dCt Values	MYL1		MYH3		MYH4		MYH8		TNNC2		TNNT3		CKM
		sg_scr	sg_BRM_1	sg_BRM_2		Biol. Rep.	sg_scr	sg_BRM_1	sg_BRM_2						Column A	sg_BRM_1	sg_BRM_2	sg_BRM_1	sg_BRM_2	sg_BRM_1	sg_BRM_2	sg_BRM_1	sg_BRM_2	sg_BRM_1	sg_BRM_2	sg_BRM_1	sg_BRM_2	sg_BRM_1	sg_BRM_2
MYL1	Mean	100	93.8	94.2	MYL1	N1	8.43	8.72	8.74						vs.	vs.	vs.	vs.	vs.	vs.	vs.	vs.	vs.	vs.	vs.	vs.	vs.	vs.	vs.
	Upper Limit	152	135.1	145.5		N2	9.64	9.7	9.81						Column B	sg_scr	sg_scr	sg_scr	sg_scr	sg_scr	sg_scr	sg_scr	sg_scr	sg_scr	sg_scr	sg_scr	sg_scr	sg_scr	sg_scr
	Lower Limit	65.8	65.1	61.1		N3	8.94	8.87	8.71
MYH3	Mean	100	99.5	91.7	MYH3	N1	14.1	13.98	13.9						Paired t test
	Upper Limit	299.8	261	250.6		N2	10.81	11.11	11.11						P value	0.4688	0.6578	0.9442	0.3484	0.9932	0.5842	0.6026	0.1138	0.6433	0.0586	0.4778	0.1636	0.4581	0.0823
	Lower Limit	33.4	37.9	33.6		N3	13.15	13.1	13.4						P value summary	ns	ns	ns	ns	ns	ns	ns	ns	ns	ns	ns	ns	ns	ns
						N4	14.24	14.14	14.39						Significantly different (P < 0.05)?	No	No	No	No	No	No	No	No	No	No	No	No	No	No
MYH4	Mean	100	100	130.1	MYH4	N1	21.48	21.3	21.63						One- or two-tailed P value?	Two-tailed	Two-tailed	Two-tailed	Two-tailed	Two-tailed	Two-tailed	Two-tailed	Two-tailed	Two-tailed	Two-tailed	Two-tailed	Two-tailed	Two-tailed	Two-tailed
	Upper Limit	190.9	131.9	176.3		N2	20.59	21.26	20.85						t, df	t=0.8868, df=2	t=0.5151, df=2	t=0.07606, df=3	t=1.109, df=3	t=0.009679, df=2	t=0.6466, df=2	t=0.5800, df=3	t=2.213, df=3	t=0.4838, df=7	t=2.256, df=7	t=0.8660, df=2	t=2.158, df=2	t=0.9119, df=2	t=3.268, df=2
	Lower Limit	52.4	75.9	96		N3	22.45	21.97	20.91						Number of pairs	3	3	4	4	3	3	4	4	8	8	3	3	3	3
MYH8	Mean	100	103.5	84	MYH8	N1	9.67	9.74	10.16
	Upper Limit	163.3	166.6	130.6		N2	11.21	11.1	11.41						How big is the difference?
	Lower Limit	61.2	64.3	54		N3	10.7	10.45	10.66						Mean of differences	0.09333	0.08333	0.0075	0.125	0.003333	-0.3767	-0.0475	0.2525	-0.0275	0.23	-0.07	0.1433	0.06667	0.2267
						N4	11.14	11.24	11.5						SD of differences	0.1823	0.2802	0.1972	0.2255	0.5965	1.009	0.1638	0.2282	0.1608	0.2883	0.14	0.115	0.1266	0.1201
TNNC2	Mean	100	100.7	86.7	TNNC2	N1	11.14	11.05	11.01						SEM of differences	0.1053	0.1618	0.0986	0.1127	0.3444	0.5825	0.08189	0.1141	0.05684	0.1019	0.08083	0.06642	0.07311	0.06936
	Upper Limit	303.9	270.8	203.6		N2	7.6	7.86	8.34						95% confidence interval	-0.3595 to 0.5462	-0.6128 to 0.7795	-0.3063 to 0.3213	-0.2338 to 0.4838	-1.478 to 1.485	-2.883 to 2.130	-0.3081 to 0.2131	-0.1107 to 0.6157	-0.1619 to 0.1069	-0.01102 to 0.4710	-0.4178 to 0.2778	-0.1424 to 0.4291	-0.2479 to 0.3812	-0.07177 to 0.5251
	Lower Limit	32.9	37.5	36.9		N3	10.25	10.18	10.41						R squared (partial eta squared)	0.2822	0.1171	0.001925	0.2907	4.684e-05	0.1729	0.1008	0.62	0.03235	0.4211	0.2727	0.6996	0.2937	0.8423
						N4	10.77	10.64	10.83
TNNT3	Mean	100	105.1	90.7	TNNT3	N1	12.57	12.5	12.71						How effective was the pairing?
	Upper Limit	131	135.2	117.1		N2	13.06	13.13	13.32						Correlation coefficient (r)	0.9581	0.8973	0.9997	0.9929	0.9011	0.04433	0.9731	0.9483	0.995	0.9846	0.9333	0.9555	0.9868	0.9994
	Lower Limit	76.3	81.7	70.3		N3	13.34	13.13	13.37						P value (one tailed)	0.0925	0.1455	0.0002	0.0035	0.1428	0.4859	0.0135	0.0259	<0.0001	<0.0001	0.117	0.0953	0.0518	0.0112
CKM	Mean	100	141.5	70.7	CKM	N1	13.96	13.98	14.07						P value summary	ns	ns	***	**	ns	ns	*	*	****	****	ns	ns	ns	*
	Upper Limit	95.4	143.5	63.4		N2	14.57	14.54	14.79						Was the pairing significantly effective?	No	No	Yes	Yes	No	No	Yes	Yes	Yes	Yes	No	No	No	Yes
	Lower Limit	85.6	131.3	55.8		N3	14.95	15.16	15.3

## Sheet: Fig.6
Fig. 6B
RH4		Relative Expression levels 72h after 3uM treatment			Corresponding dCt Values = Ct(target)-Ct(GAPDH)				Statistics based on dCt Values	MEF2C	MYL1	MYH4	MYH8	CKM
		DMSO	ATPi		Biol. Rep.	DMSO	ATPi		Column A	ATPI	ATPI	ATPI	ATPI	ATPI
MEF2C	Mean	100	390.4	MEF2C	N1	7.58	5.55		vs.	vs.	vs.	vs.	vs.	vs.
	Upper Limit	132.3	545.7		N2	8.37	6.11		Column B	DMSO	DMSO	DMSO	DMSO	DMSO
	Lower Limit	75.6	279.3		N3	8.11	6.51
MYL1	Mean	100	864.1	MYL1	N1	10.88	8.47		Paired t test
	Upper Limit	180.4	1265.3		N2	10.66	7.51		P value	0.0096	0.0156	0.0472	0.0013	0.0018
	Lower Limit	55.4	590.2		N3	12.23	8.46		P value summary	**	*	*	**	**
MYH4	Mean	100	1100.3	MYH4	N1	21.7	19.65		Significantly different (P < 0.05)?	Yes	Yes	Yes	Yes	Yes
	Upper Limit	125.3	2237.9		N2	22.34	17.6		One- or two-tailed P value?	Two-tailed	Two-tailed	Two-tailed	Two-tailed	Two-tailed
	Lower Limit	79.8	541		N3	22.14	18.55		t, df	t=10.15, df=2	t=7.911, df=2	t=4.440, df=2	t=28.02, df=2	t=23.71, df=2
MYH8	Mean	100	1591.6	MYH8	N1	11.78	8.01		Number of pairs	3	3	3	3	3
	Upper Limit	157.5	2178.4		N2	11.66	7.7
	Lower Limit	63.5	1162.9		N3	12.85	8.59		How big is the difference?
CKM	Mean	100	830	CKM	N1	13.55	10.33		Mean of differences	-1.963	-3.11	-3.46	-3.997	-3.053
	Upper Limit	149.1	1127.7		N2	13.01	10.21		SD of differences	0.335	0.6809	1.35	0.247	0.223
	Lower Limit	67.1	610.9		N3	14.17	11.03		SEM of differences	0.1934	0.3931	0.7793	0.1426	0.1288
									95% confidence interval	-2.796 to -1.131	-4.801 to -1.419	-6.813 to -0.1072	-4.610 to -3.383	-3.607 to -2.499
									R squared (partial eta squared)	0.981	0.969	0.9079	0.9975	0.9965
									How effective was the pairing?
									Correlation coefficient (r)	0.7273	0.6006	-0.9854	0.9668	0.9401
									P value (one tailed)	0.2408	0.2949	0.0544	0.0823	0.1107
									P value summary	ns	ns	ns	ns	ns
									Was the pairing significantly effective?	No	No	No	No	No
RH5		Relative Expression levels 72h after 3uM treatment			Corresponding dCt Values = Ct(target)-Ct(GAPDH)				Statistics based on dCt Values	MEF2C	MYL1	MYH4	MYH8	CKM
		DMSO	ATPi		Biol. Rep.	DMSO	ATPi		Column A	ATPI	ATPI	ATPI	ATPI	ATPI
MEF2C	Mean	100	1469.7	MEF2C	N1	7.06	2.97		vs.	vs.	vs.	vs.	vs.	vs.
	Upper Limit	130.9	1741.4		N2	7.54	3.42		Column B	DMSO	DMSO	DMSO	DMSO	DMSO
	Lower Limit	76.4	1240.4		N3	6.77	3.35
MYL1	Mean	100	1615.8	MYL1	N1	6.27	2.33		Paired t test
	Upper Limit	108.4	3379.6		N2	6.48	1.27		P value	0.0035	0.0268	0.0472	0.0104	0.0042
	Lower Limit	92.3	772.5		N3	6.29	3.4		P value summary	**	*	*	*	**
MYH4	Mean	100	691.232	MYH4	N1	19.08	16.76		Significantly different (P < 0.05)?	Yes	Yes	Yes	Yes	Yes
	Upper Limit	176.6	985.817		N2	19.77	15.74		One- or two-tailed P value?	Two-tailed	Two-tailed	Two-tailed	Two-tailed	Two-tailed
	Lower Limit	56.6	484.676		N3	18.13	16.12		t, df	t=16.97, df=2	t=5.984, df=2	t=4.437, df=2	t=9.725, df=2	t=15.41, df=2
MYH8	Mean	100	1056.4	MYH8	N1	8.24	4.71		Number of pairs	3	3	3	3	3
	Upper Limit	147.2	2323.4		N2	7.44	3.51
	Lower Limit	67.9	480.3		N3	8.52	5.78		How big is the difference?
CKM	Mean	100	1550.6	CKM	N1	11.8	7.33		Mean of differences	-3.877	-4.013	-2.787	-3.4	-3.957
	Upper Limit	196.5	2945.1		N2	10.29	6.58		SD of differences	0.3958	1.162	1.088	0.6056	0.4447
	Lower Limit	50.9	816.4		N3	12.11	8.42		SEM of differences	0.2285	0.6707	0.6281	0.3496	0.2567
									95% confidence interval	-4.860 to -2.894	-6.899 to -1.127	-5.489 to -0.08428	-4.904 to -1.896	-5.061 to -2.852
									R squared (partial eta squared)	0.9931	0.9471	0.9078	0.9793	0.9916
									How effective was the pairing?
									Correlation coefficient (r)	0.2827	-0.8181	-0.2823	0.9718	0.8916
									P value (one tailed)	0.4088	0.195	0.4089	0.0758	0.1496
									P value summary	ns	ns	ns	ns	ns
									Was the pairing significantly effective?	No	No	No	No	No
RHJT		Relative Expression levels 72h after 3uM treatment			Corresponding dCt Values = Ct(target)-Ct(GAPDH)				Statistics based on dCt Values	MEF2C	MYL1	MYH4	MYH8	CKM
		DMSO	ATPi		Biol. Rep.	DMSO	ATPi		Column A	ATPI	ATPI	ATPI	ATPI	ATPI
MEF2C	Mean	100	994.4	MEF2C	N1	6.08	2.9		vs.	vs.	vs.	vs.	vs.	vs.
	Upper Limit	138.6	1271.8		N2	6.97	3.46		Column B	DMSO	DMSO	DMSO	DMSO	DMSO
	Lower Limit	72.2	777.4		N3	6.8	3.56
MYL1	Mean	100	883.3	MYL1	N1	5.2	2.44		Paired t test
	Upper Limit	106.6	1602.8		N2	5.16	0.99		P value	0.0009	0.0262	0.035	0.0328	0.0151
	Lower Limit	93.8	486.8		N3	5.02	2.52		P value summary	***	*	*	*	*
MYH4	Mean	100	1163.99	MYH4	N1	18.75	15.33		Significantly different (P < 0.05)?	Yes	Yes	Yes	Yes	Yes
	Upper Limit	156.3	1692.54		N2	19.43	14.65		One- or two-tailed P value?	Two-tailed	Two-tailed	Two-tailed	Two-tailed	Two-tailed
	Lower Limit	64	800.503		N3	18.14	15.71		t, df	t=32.61, df=2	t=6.059, df=2	t=5.202, df=2	t=5.387, df=2	t=8.036, df=2
MYH8	Mean	100	646.7	MYH8	N1	8.41	5.12		Number of pairs	3	3	3	3	3
	Upper Limit	178	1668.4		N2	6.89	3.8
	Lower Limit	56.2	250.7		N3	8.23	6.53		How big is the difference?
CKM	Mean	100	650.6	CKM	N1	11.12	8.04		Mean of differences	-3.31	-3.143	-3.543	-2.693	-2.7
	Upper Limit	291.5	1299.1		N2	8.84	6.81		SD of differences	0.1758	0.8986	1.18	0.866	0.582
	Lower Limit	34.3	325.8		N3	11.78	8.79		SEM of differences	0.1015	0.5188	0.6812	0.5	0.336
									95% confidence interval	-3.747 to -2.873	-5.376 to -0.9112	-6.474 to -0.6124	-4.845 to -0.5420	-4.146 to -1.254
									R squared (partial eta squared)	0.9981	0.9483	0.9312	0.9355	0.97
									How effective was the pairing?
									Correlation coefficient (r)	0.9486	-0.3493	-0.9915	0.7954	0.9858
									P value (one tailed)	0.1025	0.3864	0.0416	0.2073	0.0538
									P value summary	ns	ns	*	ns	ns
									Was the pairing significantly effective?	No	No	Yes	No	No
Fig. 6E
RH4		Relative Expression levels 72h after 250nM treatment			Corresponding dCt Values = Ct(target)-Ct(GAPDH)				Statistics based on dCt Values	MYOD	MYOG	MEF2C	MYL1	MYH3	MYH4	MYH8	TNNT3	CKM
		cis	ACBI1		Biol. Rep.	cis	ACBI1		Column A	ACBI1 250nM	ACBI1 250nM	ACBI1 250nM	ACBI1 250nM	ACBI1 250nM	ACBI1 250nM	ACBI1 250nM	ACBI1 250nM	ACBI1 250nM
MYOD	Mean	100	160.6	MYOD	N1	4	3.35		vs.	vs.	vs.	vs.	vs.	vs.	vs.	vs.	vs.	vs.
	Upper Limit	128.7	220.9		N2	3.34	2.62		Column B	neg 250nM	neg 250nM	neg 250nM	neg 250nM	neg 250nM	neg 250nM	neg 250nM	neg 250nM	neg 250nM
	Lower Limit	77.7	116.8		N3	4.16	3.63
					N4	3.67	2.84		Paired t test
MYOG	Mean	100	249.4	MYOG	N1	1.99	0.65		P value	0.0017	0.0001	0.0005	<0.0001	0.0066	0.005	<0.0001	0.0048	0.0002
	Upper Limit	130.8	350.9		N2	1.81	0.46		P value summary	**	***	***	****	**	**	****	**	***
	Lower Limit	76.4	177.3		N3	2.58	1.41		Significantly different (P < 0.05)?	Yes	Yes	Yes	Yes	Yes	Yes	Yes	Yes	Yes
					N4	1.72	0.3		One- or two-tailed P value?	Two-tailed	Two-tailed	Two-tailed	Two-tailed	Two-tailed	Two-tailed	Two-tailed	Two-tailed	Two-tailed
MEF2C	Mean	100	455.5	MEF2C	N1	6.99	4.71		t, df	t=10.85, df=3	t=24.87, df=3	t=16.54, df=3	t=28.11, df=3	t=6.780, df=3	t=7.429, df=3	t=54.26, df=3	t=7.582, df=3	t=23.82, df=3
	Upper Limit	119.3	518.7		N2	6.85	4.89		Number of pairs	4	4	4	4	4	4	4	4	4
	Lower Limit	83.8	399.9		N3	7.16	5.17
					N4	7.44	4.92		How big is the difference?
MYL1	Mean	100	518.6	MYL1	N1	9	6.68		Mean of differences	-0.6825	-1.32	-2.188	-2.373	-1.168	-3.505	-4.815	-1.26	-4.628
	Upper Limit	109.4	574.4		N2	9.26	6.64		SD of differences	0.1258	0.1061	0.2645	0.1688	0.3444	0.9436	0.1775	0.3324	0.3886
	Lower Limit	91.4	468.2		N3	9.26	6.95		SEM of differences	0.0629	0.05307	0.1322	0.0844	0.1722	0.4718	0.08874	0.1662	0.1943
					N4	9.1	6.86		95% confidence interval	-0.8827 to -0.4823	-1.489 to -1.151	-2.608 to -1.767	-2.641 to -2.104	-1.716 to -0.6195	-5.006 to -2.004	-5.097 to -4.533	-1.789 to -0.7311	-5.246 to -4.009
MYH3	Mean	100	224.3	MYH3	N1	12.47	10.92		R squared (partial eta squared)	0.9752	0.9952	0.9892	0.9962	0.9387	0.9484	0.999	0.9504	0.9947
	Upper Limit	173.8	440.9		N2	12.43	11.61
	Lower Limit	57.5	114.1		N3	14.13	13.19		How effective was the pairing?
					N4	12.82	11.46		Correlation coefficient (r)	0.9816	0.9992	0.3156	0.2525	0.9442	-0.9563	0.9604	0.9623	0.9884
MYH4	Mean	100	1133.72	MYH4	N1	22.3	18.34		P value (one tailed)	0.0092	0.0004	0.3422	0.3738	0.0279	0.0219	0.0198	0.0188	0.0058
	Upper Limit	123.742	1770.52		N2	22.23	18.06		P value summary	**	***	ns	ns	*	*	*	*	**
	Lower Limit	80.8131	725.955		N3	21.62	19.51		Was the pairing significantly effective?	Yes	Yes	No	No	Yes	Yes	Yes	Yes	Yes
					N4	22.12	18.34
MYH8	Mean	100	2817.6	MYH8	N1	11.73	6.66
	Upper Limit	155.3	4340.9		N2	11.06	6.4
	Lower Limit	64.4	1828.9		N3	12.61	7.83
					N4	11.81	7.06
TNNT3	Mean	100	239.7	TNNT3	N1	9.91	8.67
	Upper Limit	159.7	454.9		N2	10.41	8.76
	Lower Limit	62.6	126.3		N3	11.45	10.61
					N4	10.17	8.86
CKM	Mean	100	2466.9	CKM	N1	12.13	7.89
	Upper Limit	238.4	4603.5		N2	14.41	9.63
	Lower Limit	41.9	1321.9		N3	14.4	9.3
					N4	12.35	7.96
RH5		Relative Expression levels 72h after 250nM treatment			Corresponding dCt Values = Ct(target)-Ct(GAPDH)				Statistics based on dCt Values	MYOD	MYOG	MEF2C	MYL1	MYH3	MYH4	MYH8	TNNT3	CKM
		cis	ACBI1		Biol. Rep.	cis	ACBI1		Column A	ACBI1 250nM	ACBI1 250nM	ACBI1 250nM	ACBI1 250nM	ACBI1 250nM	ACBI1 250nM	ACBI1 250nM	ACBI1 250nM	ACBI1 250nM
MYOD	Mean	100	243.873	MYOD	N1	3.58	1.8		vs.	vs.	vs.	vs.	vs.	vs.	vs.	vs.	vs.	vs.
	Upper Limit	127.025	261.054		N2	3.06	1.99		Column B	neg 250nM	neg 250nM	neg 250nM	neg 250nM	neg 250nM	neg 250nM	neg 250nM	neg 250nM	neg 250nM
	Lower Limit	78.7245	227.824		N3	2.93	1.92
MYOG	Mean	100	319.532	MYOG	N1	2.13	0.09		Paired t test
	Upper Limit	112.827	362.301		N2	1.93	0.27		P value	0.035	0.0151	0.0011	0.0037	0.0452	0.0189	0.001	0.0063	0.0004
	Lower Limit	88.6311	281.812		N3	1.78	0.46		P value summary	*	*	**	**	*	*	***	**	***
MEF2C	Mean	100	1009.07	MEF2C	N1	6.67	3.14		Significantly different (P < 0.05)?	Yes	Yes	Yes	Yes	Yes	Yes	Yes	Yes	Yes
	Upper Limit	114.706	1054.21		N2	6.57	3.24		One- or two-tailed P value?	Two-tailed	Two-tailed	Two-tailed	Two-tailed	Two-tailed	Two-tailed	Two-tailed	Two-tailed	Two-tailed
	Lower Limit	87.1793	965.863		N3	6.28	3.13		t, df	t=5.203, df=2	t=8.047, df=2	t=30.40, df=2	t=16.41, df=2	t=4.542, df=2	t=7.167, df=2	t=32.12, df=2	t=12.56, df=2	t=49.54, df=2
MYL1	Mean	100	1359.87	MYL1	N1	5.66	1.55		Number of pairs	3	3	3	3	3	3	3	3	3
	Upper Limit	116.208	1544.53		N2	5.56	1.71
	Lower Limit	86.0526	1197.3		N3	5.24	1.91		How big is the difference?
MYH3	Mean	100	348.626	MYH3	N1	9.56	7.14		Mean of differences	-1.287	-1.673	-3.337	-3.763	-1.82	-2.513	-5.753	-2.253	-3.777
	Upper Limit	140.836	427.59		N2	8.98	7		SD of differences	0.4283	0.3602	0.1901	0.3972	0.694	0.6074	0.3102	0.3109	0.132
	Lower Limit	71.0047	284.244		N3	8.57	7.51		SEM of differences	0.2473	0.208	0.1097	0.2293	0.4007	0.3507	0.1791	0.1795	0.07623
MYH4	Mean	100	571.556	MYH4	N1	18.52	15.5		95% confidence interval	-2.351 to -0.2227	-2.568 to -0.7786	-3.809 to -2.864	-4.750 to -2.777	-3.544 to -0.09607	-4.022 to -1.004	-6.524 to -4.983	-3.026 to -1.481	-4.105 to -3.449
	Upper Limit	166.84	701.225		N2	18.68	16		R squared (partial eta squared)	0.9312	0.97	0.9978	0.9926	0.9116	0.9625	0.9981	0.9875	0.9992
	Lower Limit	59.9376	465.865		N3	17.33	15.49
MYH8	Mean	100	5394.13	MYH8	N1	7.06	0.99		How effective was the pairing?
	Upper Limit	107.598	6280.58		N2	7.03	1.29		Correlation coefficient (r)	-0.8457	-0.9952	0.349	-0.9738	-0.6284	0.6047	-0.825	0.3007	0.9083
	Lower Limit	92.9383	4632.79		N3	6.87	1.42		P value (one tailed)	0.1792	0.0312	0.3865	0.0731	0.2837	0.2933	0.1912	0.4028	0.1374
TNNT3	Mean	100	477.701	TNNT3	N1	7.55	4.94		P value summary	ns	*	ns	ns	ns	ns	ns	ns	ns
	Upper Limit	110.771	597.73		N2	7.33	5.22		Was the pairing significantly effective?	No	Yes	No	No	No	No	No	No	No
	Lower Limit	90.2767	381.774		N3	7.62	5.58
CKM	Mean	100	1369.79	CKM	N1	10.46	6.54
	Upper Limit	120.085	1699.43		N2	10.44	6.78
	Lower Limit	83.2744	1104.09		N3	10.91	7.16
RHJT		Relative Expression levels 72h after 250nM treatment			Corresponding dCt Values = Ct(target)-Ct(GAPDH)				Statistics based on dCt Values	MYOD	MYOG	MEF2C	MYL1	MYH3	MYH4	MYH8	TNNT3	CKM
		cis	ACBI1		Biol. Rep.	cis	ACBI1		Column A	ACBI1 250nM	ACBI1 250nM	ACBI1 250nM	ACBI1 250nM	ACBI1 250nM	ACBI1 250nM	ACBI1 250nM	ACBI1 250nM	ACBI1 250nM
MYOD	Mean	100	157.3	MYOD	N1	2.37	1.55		vs.	vs.	vs.	vs.	vs.	vs.	vs.	vs.	vs.	vs.
	Upper Limit	177.9	333		N2	3.9	3.29		Column B	neg 250nM	neg 250nM	neg 250nM	neg 250nM	neg 250nM	neg 250nM	neg 250nM	neg 250nM	neg 250nM
	Lower Limit	56.2	74.3		N3	4.25	4.14
					N4	3.84	2.77		Paired t test
MYOG	Mean	100	221.8	MYOG	N1	1.28	0.45		P value	0.0493	0.0169	0.0168	0.049	0.41	0.4647	0.045	0.4251	0.0083
	Upper Limit	136.8	338.2		N2	1.59	0.52		P value summary	*	*	*	*	ns	ns	*	ns	**
	Lower Limit	73.1	145.4		N3	2.34	1.48		Significantly different (P < 0.05)?	Yes	Yes	Yes	Yes	No	No	Yes	No	Yes
					N4	1.89	0.04		One- or two-tailed P value?	Two-tailed	Two-tailed	Two-tailed	Two-tailed	Two-tailed	Two-tailed	Two-tailed	Two-tailed	Two-tailed
MEF2C	Mean	100	434.6	MEF2C	N1	6.23	3.99		t, df	t=3.201, df=3	t=4.831, df=3	t=4.837, df=3	t=3.210, df=3	t=0.9551, df=3	t=0.8355, df=3	t=3.321, df=3	t=0.9207, df=3	t=6.232, df=3
	Upper Limit	143.7	1084.9		N2	7.42	6.48		Number of pairs	4	4	4	4	4	4	4	4	4
	Lower Limit	69.6	174.1		N3	6.97	4.73
					N4	6.51	3.45		How big is the difference?
MYL1	Mean	100	300.3	MYL1	N1	5.17	3.58		Mean of differences	-0.6525	-1.153	-2.12	-1.593	-0.675	-0.435	-3.388	0.4	-3.203
	Upper Limit	138.2	498		N2	5.31	4.64		SD of differences	0.4076	0.4771	0.8765	0.9922	1.413	1.041	2.04	0.8689	1.028
	Lower Limit	72.3	181		N3	5.75	4.61		SEM of differences	0.2038	0.2386	0.4383	0.4961	0.7067	0.5206	1.02	0.4344	0.5139
					N4	6.2	3.23		95% confidence interval	-1.301 to -0.003877	-1.912 to -0.3933	-3.515 to -0.7253	-3.171 to -0.01372	-2.924 to 1.574	-2.092 to 1.222	-6.634 to -0.1408	-0.9826 to 1.783	-4.838 to -1.567
MYH3	Mean	100	159.3	MYH3	N1	9.04	8.17		R squared (partial eta squared)	0.7736	0.8861	0.8864	0.7745	0.2332	0.1888	0.7861	0.2203	0.9283
	Upper Limit	216.5	529.1		N2	11.74	10.1
	Lower Limit	46.2	48		N3	10.61	11.99		How effective was the pairing?
					N4	10.15	8.58		Correlation coefficient (r)	0.9428	0.6319	0.904	-0.3742	0.5815	0.8729	0.8658	0.8531	0.9853
MYH4	Mean	100	135.102	MYH4	N1	20.19	19.56		P value (one tailed)	0.0286	0.184	0.048	0.3129	0.2093	0.0636	0.0671	0.0735	0.0074
	Upper Limit	423.524	556.983		N2	22.23	21.83		P value summary	*	ns	*	ns	ns	ns	ns	ns	**
	Lower Limit	23.6114	32.7702		N3	17.39	18.3		Was the pairing significantly effective?	Yes	No	Yes	No	No	No	No	No	Yes
					N4	18.66	17.04
MYH8	Mean	100	1047.9	MYH8	N1	8.07	3.52
	Upper Limit	629.5	15099.7		N2	13.79	10.69
	Lower Limit	15.9	72.7		N3	9.59	8.95
					N4	8.3	3.04
TNNT3	Mean	100	75.8	TNNT3	N1	7.29	7.25
	Upper Limit	197.9	220.8		N2	9.15	9.33
	Lower Limit	50.5	26		N3	8.21	9.89
					N4	6.96	6.74
CKM	Mean	100	921.1	CKM	N1	13.19	9.32
	Upper Limit	193.3	3557.8		N2	14.48	12.54
	Lower Limit	51.7	238.5		N3	13.57	10.76
					N4	12.19	8

## Sheet: Fig. S1
Gating Strategy Fig. S1A
Fig. S1B
SMARCA4 (Z-Scores)								SMARCB1 (Z-Scores)								SMARCA2 (Z-Scores)
FN-RMS	FP-RMS	Muscle						FN-RMS	FP-RMS	Muscle						FN-RMS	FP-RMS	Muscle
0.2953	1.0552	-1.411			SMARCA4	SMARCA4		-0.4164	0.4401	0.3941			SMARCB1	SMARCB1		-0.432	0.1961	0.349			SMARCA2	SMARCA2
0.6788	0.7077	-1.7741						-0.8695	1.0035	-2.2206						-0.2502	-0.7758	1.1589
0.8137	0.0494	-1.0069		Group A	Muscle	Muscle		-0.7973	-0.3067	-1.427		Group A	Muscle	Muscle		0	0.7027	0.6923		Group A	Muscle	Muscle
1.4785	0.7558	-1.8431		vs.	vs.	vs.		0.3063	0.1804	-1.0313		vs.	vs.	vs.		-0.133	-0.6987	0.7699		vs.	vs.	vs.
0.3334	0.4963	-1.4703		Group B	FN-RMS	FP-RMS		0.2283	0.2587	-1.9932		Group B	FN-RMS	FP-RMS		-0.3936	-0.3372	1.437		Group B	FN-RMS	FP-RMS
0.3101	0.4914	-1.6159						-0.0265	-0.1305	-1.2203						-0.3783	0.1955	1.9068
1.6329	1.2314	-1.9329		Unpaired t test with Welch's correction				0.2368	0.6849	-1.4825		Unpaired t test with Welch's correction				-0.9596	0.088	1.0733		Unpaired t test with Welch's correction
0.4237	0.9702	-1.7452		P value	<0.0001	<0.0001		0.2459	0.351	-1.6666		P value	<0.0001	<0.0001		-0.1741	-0.2637	1.4226		P value	<0.0001	<0.0001
0.6239	0.6751	-1.5906		P value summary	****	****		1.5948	-0.4477	-2.4509		P value summary	****	****		0.2727	0.8738	1.3745		P value summary	****	****
0.6464	0.2894	-1.3152		Significantly different (P < 0.05)?	Yes	Yes		1.5112	0.0444	-1.4618		Significantly different (P < 0.05)?	Yes	Yes		-0.1764	1.0895	0.3861		Significantly different (P < 0.05)?	Yes	Yes
0.1403	-0.0587	-1.4898		One- or two-tailed P value?	Two-tailed	Two-tailed		1.1035	-0.4194	-1.0396		One- or two-tailed P value?	Two-tailed	Two-tailed		-0.5741	-0.0031	1.4869		One- or two-tailed P value?	Two-tailed	Two-tailed
-0.1259	1.4164			Welch-corrected t, df	t=19.11, df=43.82	t=20.11, df=30.63		0.801	0.4289			Welch-corrected t, df	t=8.309, df=12.74	t=7.712, df=13.56		0.7558	-0.3954			Welch-corrected t, df	t=6.753, df=15.45	t=6.932, df=18.42
1.0229	0.3962							1.4229	1.5711							0.3695	0.9008
1.1636	0.3014			How big is the difference?				-1.1055	0.5485			How big is the difference?				-0.0564	-0.4857			How big is the difference?
0.8443	0.6315			Mean of column A	0.7928	0.7366		0.3261	0.2493			Mean of column A	0.5971	0.4851		0.6253	-0.4934			Mean of column A	-0.02943	-0.1233
-0.5014	0.3583			Mean of column C	-1.563	-1.563		-0.1769	1.0886			Mean of column C	-1.418	-1.418		0.2583	-1.132			Mean of column C	1.096	1.096
-0.2725	0.4961			Difference between means (C - A) ± SEM	-2.356 ± 0.1233	-2.300 ± 0.1144		-0.1388	0.3884			Difference between means (C - A) ± SEM	-2.015 ± 0.2426	-1.903 ± 0.2468		0.0694	0.1049			Difference between means (C - A) ± SEM	1.126 ± 0.1667	1.219 ± 0.1759
1.0102	0.8438			95% confidence interval	-2.604 to -2.108	-2.533 to -2.066		0.5574	0			95% confidence interval	-2.540 to -1.490	-2.434 to -1.372		-0.1155	0.2849			95% confidence interval	0.7712 to 1.480	0.8505 to 1.588
1.5198	1.8296			R squared (eta squared)	0.8929	0.9296		0.247	0.9703			R squared (eta squared)	0.8442	0.8143		-0.2381	-0.5254			R squared (eta squared)	0.7469	0.7229
1.0188	0.9326							1.4278	0.8056							0.2968	-0.4544
0.4085	1.5738			F test to compare variances				0.1526	0.0757			F test to compare variances				-1.5689	-0.0843			F test to compare variances
-0.8717	0.384			F, DFn, Dfd	8.367, 66, 10	2.940, 30, 10		-0.0849	0.1516			F, DFn, Dfd	1.260, 10, 66	2.084, 10, 30		0.664	0.0388			F, DFn, Dfd	1.516, 66, 10	1.103, 30, 10
0.6464	1.1663			P value	0.001	0.0754		0.1696	0.889			P value	0.543	0.1175		0.3988	-0.2057			P value	0.4857	0.9206
0.2862	0.3622			P value summary	***	ns		-0.0721	-0.0105			P value summary	ns	ns		-0.5561	-0.7044			P value summary	ns	ns
0.548	0.7985			Significantly different (P < 0.05)?	Yes	No		-0.1115	0.7855			Significantly different (P < 0.05)?	No	No		0.6908	-0.7569			Significantly different (P < 0.05)?	No	No
0.7521	0.6886							0.6326	0.5184							-0.3335	-0.183
1.4285	0.2205			Data analyzed				1.6643	0.3229			Data analyzed				-0.0255	-0.1671			Data analyzed
1.6493	1.0894			Sample size, column A	67	31		0.5109	1.3089			Sample size, column A	67	31		0.3844	-0.3188			Sample size, column A	67	31
-0.346	0.9177			Sample size, column C	11	11		0.5531	1.0063			Sample size, column C	11	11		0.9162	0.1847			Sample size, column C	11	11
1.0118	1.4007							1.9309	1.3367							-0.0432	-0.3581
0.0045	0.3646							-0.0871	0.9431							0.1773	-0.1404
2.2266								1.6469								-2.0227
0.8276								1.308								-0.1663
-0.2696								1.5818								-0.1945
1.7014								1.3161								-1.6811
2.6593								0.6936								-0.4006
-0.1084								-0.0373								0.1268
1.2409								1.2114								-0.5402
0.5485								1.5346								0.3786
1.6564								0.86								-0.3602
0.6097								0.3989								1.1394
1.4389								1.2567								0.5979
-0.2122								0.4395								0.1571
0.2086								0.7558								0.6186
1.8173								0.6941								-0.0359
0.8338								0.7382								0.1
0.7193								0.5171								0.1255
1.986								0.789								-0.4651
0.5303								1.0636								-0.3127
0.0129								-0.1274								0.4326
1.6133								1.4974								0.9576
0.9082								1.264								0.7846
0.4913								0.5136								0.1015
-0.2034								-0.545								0.7979
3.3558								0.736								0.3136
1.2343								1.2154								-0.0261
0.8108								0.6474								0.7443
1.2174								0.6389								0.3223
0.2141								0.4493								-0.7314
0.255								0.6943								0.5775
1.0846								0.9739								-0.6055
1.2659								0.9701								-0.9313
0.8801								1.5961								-0.7644
0.245								-0.0648								0.3289
1.2112								0.4197								-0.1941
0.005								0.3126								-0.3186
1.5289								0.3118								-0.2968

## Sheet: Fig. S2
Fig. S2B
merged raw image (* indicates corrsponding unmerged raw image)												merged raw image (* indicates corrsponding unmerged raw image)
Fig. S2D
merged raw image (* indicates corrsponding unmerged raw image)
same samples reloaded
same samples reloaded
same blot restained
Fig. S2E
merged raw image (* indicates corrsponding unmerged raw image)													same samples reloaded
same samples reloaded
																				long exposure
same samples reloaded
Fig. S2F
merged raw image (* indicates corrsponding unmerged raw image)													long exposure

## Sheet: Fig. S3
Fig.S3C
merged raw image (* indicates corrsponding unmerged raw image)									long exposure
Fig.S3D
RH4		% of Input (spike-in normalized)		Corresponding spike-in normalized dCt Values = Ctinput-corr.fact.-Ctsample					Statistics based on dCt Values
		sgscr		Biol. Rep.	sgscr				Column A	MYOD1_A	MYOD1_B	MYOG	MEF2C	TNNT2_A	TNNT2_B	TNNT3	CKM	MYH3	MYHAS	TNNC2
Desert	Mean	0.149816	Desert	N1	-9.26327				vs.	vs.	vs.	vs.	vs.	vs.	vs.	vs.	vs.	vs.	vs.	vs.
	Upper Limit	0.255444		N2	-10.2051				Column B	Desert	Desert	Desert	Desert	Desert	Desert	Desert	Desert	Desert	Desert	Desert
	Lower Limit	0.0878663		N3	-8.6794
MYOD1_A_	Mean	0.70908	MYOD1_A_	N1	-7.09515				Paired t test
	Upper Limit	1.06055		N2	-7.74168				P value	0.0025	0.0083	0.0041	0.0215	0.0044	0.003	0.0165	0.0226	0.0146	0.004	0.0066
	Lower Limit	0.474087		N3	-6.58268				P value summary	**	**	**	*	**	**	*	*	*	**	**
MYOD1_B	Mean	1.06017	MYOD1_B	N1	-6.73583				Significantly different (P < 0.05)?	Yes	Yes	Yes	Yes	Yes	Yes	Yes	Yes	Yes	Yes	Yes
	Upper Limit	1.42088		N2	-6.86537				One- or two-tailed P value?	Two-tailed	Two-tailed	Two-tailed	Two-tailed	Two-tailed	Two-tailed	Two-tailed	Two-tailed	Two-tailed	Two-tailed	Two-tailed
	Lower Limit	0.791033		N3	-6.07748				t, df	t=19.98, df=2	t=10.89, df=2	t=15.65, df=2	t=6.712, df=2	t=14.97, df=2	t=18.14, df=2	t=7.687, df=2	t=6.543, df=2	t=8.199, df=2	t=15.77, df=2	t=12.22, df=2
MYOG	Mean	1.24914	MYOG	N1	-6.58534				Number of pairs	3	3	3	3	3	3	3	3	3	3	3
	Upper Limit	2.06603		N2	-6.88114
	Lower Limit	0.755243		N3	-5.50227				How big is the difference?
MEF2C	Mean	0.434556	MEF2C	N1	-8.02417				Mean of differences	2.243	2.823	3.06	1.536	2.955	3.083	1.239	1.315	2.184	4.085	2.905
	Upper Limit	0.608773		N2	-8.21859				SD of differences	0.1944	0.449	0.3386	0.3965	0.3419	0.2944	0.2791	0.348	0.4614	0.4489	0.4117
	Lower Limit	0.310196		N3	-7.29597				SEM of differences	0.1122	0.2592	0.1955	0.2289	0.1974	0.17	0.1611	0.2009	0.2664	0.2591	0.2377
TNNT2_A	Mean	1.16142	TNNT2_A	N1	-6.56756				95% confidence interval	1.760 to 2.726	1.708 to 3.938	2.218 to 3.901	0.5515 to 2.521	2.105 to 3.804	2.352 to 3.815	0.5453 to 1.932	0.4502 to 2.179	1.038 to 3.330	2.970 to 5.200	1.882 to 3.928
	Upper Limit	1.6643		N2	-6.86292				R squared (partial eta squared)	0.995	0.9834	0.9919	0.9575	0.9912	0.994	0.9673	0.9554	0.9711	0.992	0.9868
	Lower Limit	0.810489		N3	-5.85342
TNNT2_B	Mean	1.26991	TNNT2_B	N1	-6.29725				How effective was the pairing?
	Upper Limit	1.77923		N2	-6.7866				Correlation coefficient (r)	0.9977	0.8755	0.8991	0.8974	0.9324	0.9914	0.9993	0.9536	0.9732	0.8135	0.9011
	Lower Limit	0.906383		N3	-5.81355				P value (one tailed)	0.0216	0.1605	0.1442	0.1455	0.1177	0.0418	0.0121	0.0973	0.0738	0.1976	0.1428
TNNT3	Mean	0.353538	TNNT3	N1	-8.04634				P value summary	*	ns	ns	ns	ns	*	*	ns	ns	ns	ns
	Upper Limit	0.497104		N2	-8.67708				Was the pairing significantly effective?	Yes	No	No	No	No	Yes	Yes	No	No	No	No
	Lower Limit	0.251434		N3	-7.70834
CKM	Mean	0.372688	CKM	N1	-7.57858
	Upper Limit	0.742149		N2	-9.21132
	Lower Limit	0.187155		N3	-7.41354
MYH3	Mean	0.680819	MYH3	N1	-7.23477
	Upper Limit	0.851722		N2	-7.50197
	Lower Limit	0.544209		N3	-6.8588
MYHAS	Mean	2.54334	MYHAS	N1	-5.61758
	Upper Limit	3.83927		N2	-5.66221
	Lower Limit	1.68485		N3	-4.6116
TNNC2	Mean	1.12213	TNNC2	N1	-6.63904
	Upper Limit	1.53582		N2	-6.82754
	Lower Limit	0.819875		N3	-5.96626
Fig.S3E
RH4		relative % of Input (spike-in normalized)				Corresponding spike-in normalized dCt Values = Ctinput-corr.fact.-Ctsample			Statistics based on dCt Values	MYOD1_A	MYOD1_B	MYOG	MEF2C	TNNT2_A	TNNT2_B	TNNT3	CKM	MYH3	MYHAS	TNNC2
		sgscr	sgBRG1			sgscr	sgBRG1		Column A	sgBRG1	sgBRG1	sgBRG1	sgBRG1	sgBRG1	sgBRG1	sgBRG1	sgBRG1	sgBRG1	sgBRG1	sgBRG1
MYOD1_A_	Mean	100	6.36913	MYOD1_A_	N1	-7.09515	-10.3101		vs.	vs.	vs.	vs.	vs.	vs.	vs.	vs.	vs.	vs.	vs.	vs.
	Upper Limit	149.567	11.2468		N2	-7.74168	-11.078		Column B	sgscr	sgscr	sgscr	sgscr	sgscr	sgscr	sgscr	sgscr	sgscr	sgscr	sgscr
	Lower Limit	66.8595	3.60689		N3	-6.58268	-11.9497
MYOD1_B	Mean	100	8.47959	MYOD1_B	N1	-6.73583	-9.75043		Paired t test
	Upper Limit	134.024	11.995		N2	-6.86537	-9.91889		P value	0.0295	0.0211	0.0451	0.0174	0.0184	0.027	0.0226	0.0404	0.0297	0.0435	0.0395
	Lower Limit	74.6137	5.99445		N3	-6.07748	-10.689		P value summary	*	*	*	*	*	*	*	*	*	*	*
MYOG	Mean	100	8.09577	MYOG	N1	-6.58534	-9.06071		Significantly different (P < 0.05)?	Yes	Yes	Yes	Yes	Yes	Yes	Yes	Yes	Yes	Yes	Yes
	Upper Limit	165.396	14.2373		N2	-6.88114	-10.1281		One- or two-tailed P value?	Two-tailed	Two-tailed	Two-tailed	Two-tailed	Two-tailed	Two-tailed	Two-tailed	Two-tailed	Two-tailed	Two-tailed	Two-tailed
	Lower Limit	60.4609	4.6035		N3	-5.50227	-10.66		t, df	t=5.692, df=2	t=6.769, df=2	t=4.549, df=2	t=7.481, df=2	t=7.264, df=2	t=5.961, df=2	t=6.539, df=2	t=4.821, df=2	t=5.670, df=2	t=4.637, df=2	t=4.883, df=2
MEF2C	Mean	100	6.31653	MEF2C	N1	-8.02417	-11.1234		Number of pairs	3	3	3	3	3	3	3	3	3	3	3
	Upper Limit	140.091	9.67394		N2	-8.21859	-12.1332
	Lower Limit	71.3822	4.12433		N3	-7.29597	-12.2363		How big is the difference?
TNNT2_A	Mean	100	6.25183	TNNT2_A	N1	-6.56756	-9.89605		Mean of differences	-3.973	-3.56	-3.627	-3.985	-4	-3.886	-4.036	-3.741	-4.032	-3.938	-3.588
	Upper Limit	143.299	8.99238		N2	-6.86292	-10.442		SD of differences	1.209	0.9109	1.381	0.9226	0.9536	1.129	1.069	1.344	1.232	1.471	1.273
	Lower Limit	69.7844	4.3465		N3	-5.85342	-10.9446		SEM of differences	0.698	0.5259	0.7973	0.5327	0.5506	0.6519	0.6171	0.776	0.7111	0.8491	0.7347
TNNT2_B	Mean	100	6.76418	TNNT2_B	N1	-6.29725	-9.65838		95% confidence interval	-6.976 to -0.9695	-5.823 to -1.297	-7.057 to -0.1964	-6.277 to -1.693	-6.368 to -1.631	-6.691 to -1.081	-6.691 to -1.380	-7.079 to -0.4021	-7.091 to -0.9723	-7.591 to -0.2842	-6.749 to -0.4264
	Upper Limit	140.107	11.0822		N2	-6.7866	-9.90138		R squared (partial eta squared)	0.9418	0.9582	0.9119	0.9655	0.9635	0.9467	0.9553	0.9208	0.9414	0.9149	0.9226
	Lower Limit	71.3739	4.12861		N3	-5.81355	-10.9955
TNNT3	Mean	100	6.0978	TNNT3	N1	-8.04634	-11.275		How effective was the pairing?
	Upper Limit	140.609	10.9749		N2	-8.67708	-12.3073		Correlation coefficient (r)	-0.4737	-0.9483	-0.606	-0.3952	-0.6704	-0.7659	-0.2181	-0.2825	-0.7373	-0.9053	-0.9493
	Lower Limit	71.1195	3.38801		N3	-7.70834	-12.9561		P value (one tailed)	0.3429	0.1028	0.2928	0.3707	0.2661	0.2223	0.43	0.4088	0.2361	0.1396	0.1018
CKM	Mean	100	7.4803	CKM	N1	-7.57858	-11.2333		P value summary	ns	ns	ns	ns	ns	ns	ns	ns	ns	ns	ns
	Upper Limit	199.134	11.8743		N2	-9.21132	-11.6532		Was the pairing significantly effective?	No	No	No	No	No	No	No	No	No	No	No
	Lower Limit	50.2175	4.71226		N3	-7.41354	-12.5392
MYH3	Mean	100	6.11324	MYH3	N1	-7.23477	-10.3937
	Upper Limit	125.103	12.0075		N2	-7.50197	-10.9981
	Lower Limit	79.9344	3.11236		N3	-6.8588	-12.2995
MYHAS	Mean	100	6.52589	MYHAS	N1	-5.61758	-8.39483
	Upper Limit	150.954	12.2715		N2	-5.66221	-9.1063
	Lower Limit	66.2454	3.47041		N3	-4.6116	-10.2033
TNNC2	Mean	100	8.31784	TNNC2	N1	-6.63904	-9.49456
	Upper Limit	136.866	14.8355		N2	-6.82754	-9.67788
	Lower Limit	73.064	4.66358		N3	-5.96626	-11.0233

## Sheet: Fig.S6
Fig.S6A
merged raw image (* indicates corrsponding unmerged raw image)									long exposure											same samples reloaded
						RH4		RH5		RHJT
					Relative intensities	cis	ACBI1	cis	ACBI1	cis	ACBI1
				X	GAPDH	1	0.94	1	0.31	1	0.38
				X	P3F	1	0.78	1	0.37	1	0.45
				normalized
				to GAPDH		1	0.829787	1	1.19355	1	1.18421
Fig.S6B
merged raw image (* indicates corrsponding unmerged raw image)								long exposure									same samples reloaded
Fig.S6C	relative viabilities compared to DMSO
Drug concentration (uM)	RD BRG ATPI				RH36 BRG ATPI				RH4 BRG ATPI				RHJT BRG ATPI				RH5 BRG ATPI
0.001	100	100	100	100	100	100	100	100	100	100	100	100	100	100	100	100	100	100	100	100
0.0065	91.4165	101.136	90.9437	96.7602	125.868	105.832	124.022	105.18	65.9752	80.9084	84.4042	85.1058	59.0765	75.7431	73.3069	76.4173	33.8096	47.0684	41.5471	64.7354
0.00977	88.769	94.8463	92.9697	85.855	110.319	106.75	108.735	107.156	82.1929	76.9903	80.9445	82.8799	59.9881	67.2452	63.6288	64.5182	34.667	42.0033	40.9999	54.6989
0.0147	88.4992	93.8854	89.5411	88.31	101.079	111.317	106.526	107.531	64.9515	72.6229	77.6222	76.8343	56.8173	61.4403	66.5343	70.4893	33.1635	45.9446	36.1485	53.4671
0.0221	81.0118	89.7449	87.9654	85.5377	103.729	101.937	111.91	102.267	72.0636	68.5301	73.1741	71.3658	55.9651	53.3613	58.4239	59.5818	33.6854	45.7492	40.6153	50.9124
0.0332	95.2445	95.283	95.2381	90.7315	114.798	122.879	120.772	122.197	59.2942	64.7367	69.028	72.0802	46.5914	48.0949	52.801	58.116	34.0333	42.899	41.7394	60.1962
0.0499	86.4755	92.348	89.9048	84.2685	125.047	129.976	124.251	130.414	62.1228	59.5707	69.9616	63.6164	51.6052	46.918	47.5543	49.7521	36.6302	44.8697	41.9169	52.4407
0.075	91.8718	98.812	92.5887	92.3848	136.374	130.852	141.696	135.074	57.9472	58.9468	63.6738	63.8637	37.4554	45.4019	45.1714	48.3941	35.1889	41.1401	42.8783	54.3567
0.113	93.3052	91.9112	92.5714	83.016	135.882	141.864	144.413	143.166	56.25	48.8146	57.743	57.5158	37.614	38.3403	39.7784	40.526	33.1387	39.7883	33.7968	50
0.17	90.8263	91.3871	88.6407	85.2872	135.647	130.689	138.725	132.973	37.4192	27.5268	45.2773	45.0673	25.5648	29.0245	29.4105	34.5117	27.6466	27.0033	31.0457	28.8549
0.255	97.7403	93.8155	99.4805	90.6814	139.728	136.909	148.324	139.567	38.847	pipetting error	39.2092	pipetting error	32.9766	pipetting error	31.4799	pipetting error	27.6218	28.8437	26.9487	30.5201
0.383	100	106.115	92.5022	89.9633	100	131.607	142.915	140.795	23.9493	34.4896	29.4069	35.6417	18.4304	30.2613	24.2893	31.0627	21.6451	22.5244	25.2921	34.1013
0.576	103.287	104.909	95.7229	96.9606	91.1046	128.997	141.976	131.371	25.1078	21.5373	23.8605	22.9733	30.0238	30.2613	31.6472	28.2173	18.1039	26.1238	20.1597	25.5475
0.866	105.16	107.914	100.589	94.5892	93.2209	127.488	134.357	133.014	13.9547	18.268	20.1263	21.2421	27.7844	31.7774	32.1279	31.343	15.6312	21.8078	17.2164	21.3504
1.3	110.044	107.407	108.623	109.82	87.9043	115.559	125.698	123.736	18.2651	16.3214	18.7809	17.4224	33.5513	37.6022	36.434	40.6984	15.7927	20.2932	21.8607	23.4033
1.96	117.058	113.976	110.719	115.865	88.6098	123.45	122.981	127.814	12.0959	14.0754	17.8748	16.1858	32.2235	43.4271	39.5276	42.3152	16.1779	17.4593	20.0118	25.6843
Fig.S6D	relative viabilities compared to DMSO
Drug concentration (uM)	RD_ACBI1				RH36_ACBI1				RH4_ACBI1				RH5						RHJT_ACBI1
0.001	100	100	100	100	100	100	100	100	100	100	100	100	100	100	100	100	100	100	100	100	100	100
0.01	96.0412	88.4628	89.6436	94.591	113.846	108.135	119.462	108.064	93.022	97.6852	90.4605	104.956	67.0108	79.7158	76.0926	72.7742	106.122	71.1528	89.4919	97.4295	89.1665	97.5429
0.0237	92.3278	84.4199	90.6824	99.9165	105.867	108.808	98.8467	109.779	81.4012	88.4259	83.9713	96.1526	64.4467	56.9639	54.963	52.0121	39.2663	58.4027	93.3949	89.7634	81.8652	73.9762
0.0562	93.931	89.2617	87.4221	104.708	122.686	131.242	109.755	124.212	69.3634	82.6389	75.8074	91.2944	22.3025	22.4715	22.1852	27.849	39.0855	21.0554	60.0693	65.8098	65.6041	74.6103
0.133	89.0234	79.8019	91.0181	94.3406	124.094	123.375	117.323	124.727	61.5235	69.1262	64.8026	80.9586	11.5815	11.8527	11.6852	11.5029	10.9791	9.9876	37.8984	42.8117	34.9989	31.0436
0.316	94.4054	94.9984	102.333	103.823	143.26	136.262	135.656	132.104	53.6002	59.0857	57.6555	71.3727	10.9103	6.00112	7.7963	5.37749	15.0607	7.26049	17.552	17.1292	17.6825	22.5892
0.75	102.716	101.087	103.948	114.324	136.141	134.469	124.555	130.024	47.0392	60.5324	54.8744	67.6557	8.22578	11.6844	7.87037	6.74857	5.47662	8.67717	14.1801	18.4941	17.0149	13.1044
1.78	104.646	102.78	105.21	114.057	113.716	119.005	111.004	119.344	53.5446	58.2755	55.3529	71.927	8.24299	6.33763	4.14815	3.88177	9.32576	3.80733	16.097	17.6979	13.0088	21.638
4.22	105.954	100.128	107.847	113.923	100.078	100.964	93.729	95.0675	53.35	54.3403	55.2632	64.493	5.64447	6.33763	5.92593	3.61467	3.6683	3.98442	12.8868	16.6743	12.255	17.9657
10	102.176	99.5366	101.454	112.17	87.0404	96.8624	86.593	92.2368	48.9853	58.4491	53.1699	66.3189	6.35003	3.98205	4.31482	4.30912	5.11496	2.58544	10.5774	12.1701	14.9903	19.0489
Fig.S6G
RD		Relative Expression levels 72h after 250nM treatment			Corresponding dCt Values = Ct(target)-Ct(GAPDH)				RH36		Relative Expression levels 72h after 250nM treatment			Corresponding dCt Values = Ct(target)-Ct(GAPDH)
		cis	ACBI1		Biol. Rep.	cis	ACBI1				cis	ACBI1		Biol. Rep.	cis	ACBI1
MYOD	Mean	100	44.6408	MYOD	N1	6.58807	7.3532		MYOD	Mean	100	16.9791	MYOD	N1	4.85525	7.70371
	Upper Limit	123.249	69.6193		N2	7.16094	8.4296			Upper Limit	143.428	20.4466		N2	5.80981	8.12673
	Lower Limit	81.1366	28.6243		N3	7.03792	8.49484			Lower Limit	69.7213	14.0997		N3	5.69146	8.20057
MYOG	Mean	100	164.359	MYOG	N1	6.89485	6.15848		MYOG	Mean	100	14.162	MYOG	N1	2.95781	6.10243
	Upper Limit	128.156	207.259		N2	6.21301	5.54756			Upper Limit	113.28	15.2486		N2	3.25451	5.9576
	Lower Limit	78.0302	130.339		N3	6.36527	5.61654			Lower Limit	88.2769	13.1529		N3	3.28241	5.89441
MEF2C	Mean	100	300.782	MEF2C	N1	8.34951	6.86151		MEF2C	Mean	100	205.709	MEF2C	N1	6.64299	6.31176
	Upper Limit	149.292	476.39		N2	7.30296	5.69988			Upper Limit	115.679	360.992		N2	7.00671	4.90814
	Lower Limit	66.9828	189.907		N3	7.40047	5.72539			Lower Limit	86.4461	117.222		N3	7.00717	6.31514
MYL1	Mean	100	57.666	MYL1	N1	8.986	10.7855		MYL1	Mean	100	153.124	MYL1	N1	2.75753	2.49667
	Upper Limit	244.096	257.092		N2	6.67479	6.97765			Upper Limit	107.793	190.235		N2	2.91731	1.90875
	Lower Limit	40.9675	12.9345		N3	6.84739	7.12762			Lower Limit	92.77	123.253		N3	2.96399	2.3893
MYH3	Mean	100	21.318	MYH3	N1	12.2445	12.6515		MYH3	Mean	100	21.7935	MYH3	N1	5.9899	8.4484
	Upper Limit	250.48	25.827		N2	9.91675	12.9832			Upper Limit	108.379	25.4312		N2	6.16794	8.00383
	Lower Limit	39.9234	17.5962		N3	9.98499	13.2012			Lower Limit	92.2687	18.6762		N3	5.94987	8.24957
MYH8	Mean	100	1278.74	MYH8	N1	17.8725	14.5924		MYH8	Mean	100	56.4059	MYH8	N1	6.38666	7.39712
	Upper Limit	121.064	1785.89		N2	17.3942	13.7596			Upper Limit	111.401	59.3624		N2	6.68839	7.45349
	Lower Limit	82.6009	915.612		N3	17.8711	13.7558			Lower Limit	89.7657	53.5966		N3	6.60465	7.30735
TNNC2	Mean	100	3.21215	TNNC2	N1	9.52974	13.3334		TNNC2	Mean	100	1.05966	TNNC2	N1	3.91453	10.1232
	Upper Limit	286.662	4.59111		N2	6.81722	12.4484			Upper Limit	116.613	1.23831		N2	3.54288	10.5709
	Lower Limit	34.8843	2.24736		N3	6.98731	12.4334			Lower Limit	85.7535	0.906778		N3	3.93825	10.3823
TNNT3	Mean	100	15.8464	TNNT3	N1	13.2163	15.1886		TNNT3	Mean	100	12.8534	TNNT3	N1	6.75953	9.87496
	Upper Limit	249.579	26.2099		N2	10.9048	13.9079			Upper Limit	107.497	13.3813		N2	6.9168	9.86695
	Lower Limit	40.0674	9.58064		N3	10.9578	13.9558			Lower Limit	93.0257	12.3463		N3	6.95685	9.77061
CKM	Mean	100	19.5613	CKM	N1	13.9493	15.3583		CKM	Mean	100	2.18907	CKM	N1	9.37547	14.1462
	Upper Limit	330.449	36.5457		N2	10.8269	13.7418			Upper Limit	256.973	2.4175		N2	9.1275	13.8824
	Lower Limit	30.2619	10.4703		N3	11.1197	13.8576			Lower Limit	38.9145	1.98222		N3	6.90289	13.9178
RD		Relative Expression levels 72h after 3 uM treatment			Corresponding dCt Values = Ct(target)-Ct(GAPDH)				RH36		Relative Expression levels 72h after 3 uM treatment			Corresponding dCt Values = Ct(target)-Ct(GAPDH)
		DMSO	ATPi		Biol. Rep.	DMSO	ATPi				DMSO	ATPi		Biol. Rep.	DMSO	ATPi
MYOD	Mean	100	13.3914	MYOD	N1	6.49053	10.0266		MYOD	Mean	100	14.5229	MYOD	N1	5.37651	8.37935
	Upper Limit	138.291	14.4682		N2	7.25085	9.80714			Upper Limit	115.587	17.7292		N2	5.7609	8.19617
	Lower Limit	72.311	12.3946		N3	7.3426	9.95217			Lower Limit	86.5152	11.8964		N3	5.71081	8.60318
MYOG	Mean	100	6.10836	MYOG	N1	7.10917	12.5995		MYOG	Mean	100	9.63685	MYOG	N1	3.14813	6.53846
	Upper Limit	130.086	19.5492		N2	6.39111	9.38756			Upper Limit	113.343	10.8981		N2	3.49231	6.75289
	Lower Limit	76.8723	1.90862		N3	6.53736	10.1498			Lower Limit	88.2281	8.52155		N3	3.41561	6.89058
MEF2C	Mean	100	304.033	MEF2C	N1	8.60622	6.78717		MEF2C	Mean	100	159.368	MEF2C	N1	6.8449	6.35206
	Upper Limit	174.341	466.033		N2	7.2184	5.70021			Upper Limit	112.999	165.269		N2	7.15517	6.33987
	Lower Limit	57.3589	198.346		N3	7.21613	5.74069			Lower Limit	88.4965	153.678		N3	7.14514	6.43619
MYL1	Mean	100	17.1533	MYL1	N1	9.7159	12.1617		MYL1	Mean	100	119.625	MYL1	N1	3.06805	2.97883
	Upper Limit	318.797	51.9605		N2	6.75299	9.21616			Upper Limit	108.618	125.971		N2	3.28578	2.99948
	Lower Limit	31.3679	5.66269		N3	6.88944	9.61077			Lower Limit	92.0659	113.599		N3	3.26127	2.86124
MYH3	Mean	100	7.92069	MYH3	N1	12.0546	13.413		MYH3	Mean	100	3.07961	MYH3	N1	5.99977	10.7438
	Upper Limit	248.634	15.8904		N2	9.68352	13.856			Upper Limit	116.273	4.07218		N2	6.39186	11.1959
	Lower Limit	40.2197	3.94813		N3	9.88757	15.3314			Lower Limit	86.0042	2.32897		N3	6.03257	11.5478
MYH8	Mean	100	113.816	MYH8	N1	18.0484	18.6705		MYH8	Mean	100	2.46801	MYH8	N1	6.35314	11.5173
	Upper Limit	108.786	223.976		N2	17.9309	16.7783			Upper Limit	119.766	3.527		N2	6.83704	11.9161
	Lower Limit	91.9233	57.8371		N3	18.1738	18.1442			Lower Limit	83.4959	1.72698		N3	6.761	12.5393
TNNT3	Mean	100	20.4224	TNNT3	N1	13.095	15.0618		TNNT3	Mean	100	5.76897	TNNT3	N1	6.93587	10.371
	Upper Limit	225.695	39.4199		N2	10.9912	13.1922			Upper Limit	108.995	9.22574		N2	7.17385	11.4764
	Lower Limit	44.3077	10.5803		N3	11.1386	13.8462			Lower Limit	91.7477	3.60741		N3	6.99288	11.6019
TNNC2	Mean	100	0.362028	TNNC2	N1	9.8424	16.5327		TNNC2	Mean	100	0.954419	TNNC2	N1	4.01055	10.5102
	Upper Limit	300.547	0.464036		N2	6.98297	15.8653			Upper Limit	105.958	1.17109		N2	4.17351	10.8312
	Lower Limit	33.2727	0.282444		N3	7.21726	15.9737			Lower Limit	94.3768	0.777837		N3	4.12363	11.0997
TNNC1	Mean	100	127.211	TNNC1	N1	13.0532	12.1869		TNNC1	Mean	100	70.0893	TNNC1	N1	7.50391	8.20472
	Upper Limit	218.705	203.782		N2	11.0947	11.0326			Upper Limit	120.607	75.9557		N2	8.00703	8.33524
	Lower Limit	45.7238	79.4118		N3	11.1009	10.9876			Lower Limit	82.914	64.676		N3	7.92682	8.43601
CKM	Mean	100	7.9237	CKM	N1	14.04	17.0602		CKM	Mean	100	7.45658	CKM	N1	9.26127	13.0327
	Upper Limit	334.183	18.4794		N2	10.9323	14.7125			Upper Limit	105.23	8.2946		N2	9.39862	12.922
	Lower Limit	29.9237	3.39757		N3	11.1275	15.3002			Lower Limit	95.0303	6.70323		N3	9.2844	13.2256
Fig.S6H
RD Cas9		Relative Expression levels 7d after transduction				Corresponding dCt Values = Ct(target)-Ct(GAPDH)
		sg_scr	sg_BRG1_1	sg_BRG1_2		Biol. Rep.	sg_scr	sg_BRG1_1	sg_BRG1_2
MYL1	Mean	100	92.9528	94.1215	MYL1	N1	3.85551	3.68431	3.77235
	Upper Limit	141.364	145.22	142.637		N2	4.14062	4.47438	4.31393
	Lower Limit	70.7396	59.4975	62.1077		N3	4.83024	5.23312	5.16312
						N4	4.84807	4.70437	4.77466
MYH3	Mean	100	46.8099	48.3909	MYH3	N1	7.59237	8.12559	8.17697
	Upper Limit	199.394	113.83	92.1233		N2	6.94366	8.60448	8.65854
	Lower Limit	50.152	19.2494	25.4189		N3	9.15326	11.0308	10.3179
						N4	8.62116	8.93008	9.34578
MYH4	Mean	100	93.9694	113.757	MYH4	N1	22.5853	22.8757	22.8128
	Upper Limit	125.283	124.05	282.231		N2	23.2657	22.7327	20.981
	Lower Limit	79.8193	71.1829	45.8518		N3	23.2686	23.1715	23.7408
						N4	22.9411	23.6398	23.7824
MYH8	Mean	100	194.692	208.364	MYH8	N1	13.8279	12.9744	12.9557
	Upper Limit	192.024	538.493	632.293		N2	13.1902	10.8339	10.3793
	Lower Limit	52.0768	70.3907	68.6636		N3	14.3953	14.2078	14.1487
						N4	12.1999	11.7524	11.8931
TNNC2	Mean	100	179.149	55.8195	TNNC2	N1	5.79591	6.43844	7.03301
	Upper Limit	46.2946	96.8236	22.135		N2	5.58607	7.10075	7.40179
	Lower Limit	37.17	68.4901	20.1724		N3	7.34633	8.95349	9.05994
						N4	6.84703	7.52699	7.79176
TNNT3	Mean	100	60.4546	56.7305	TNNT3	N1	8.83052	9.31166	9.64951
	Upper Limit	280.086	166.433	133.858		N2	8.50913	9.74675	9.93982
	Lower Limit	35.7033	21.9593	24.0431		N3	11.7858	12.6031	12.4023
						N4	10.0716	10.4398	10.4767
CKM	Mean	100	59.4875	55.7759	CKM	N1	9.51441	10.0912	10.2974
	Upper Limit	199.623	130.306	123.774		N2	9.25672	10.1288	10.0726
	Lower Limit	50.0945	27.1574	25.1342		N3	11.4878	12.4993	12.609
						N4	10.1613	10.6982	10.8104
