# Supplementary material for: BAF complexes drive proliferation and block myogenic differentiation in fusion-positive rhabdomyosarcoma
Source: Research Square preprint supplement (doi:10.21203/rs.3.rs-131009/v1), 2021-01-07
Supplement: Supplementary file 5 [file 8aa28bd68f70f4384618dd21.xlsx]

## Sheet: Table S2A - CBirAP3F vs Control
	ProteinName	TopProteinName	nrPeptides	Fasta.headers	Control	Pull	proteinID	log2FC	CI.L	CI.R	AveExpr	t	P.Value	adj.P.Val	B	nrNAs	002_S186542_HEK293T_BirA_Empty_Biotin_4_E.raw	007_S184702_HEK293T_BirA_Empty_Biotin_E.raw	012_S186541_HEK293T_BirA_Empty_Biotin_3_E.raw	014_S186540_HEK293T_BirA_Empty_Biotin_2_E.raw	004_S186534_HEK293T_CBirA_P3F_Biotin_2_C.raw	006_S186535_HEK293T_CBirA_P3F_Biotin_3_C.raw	010_S184706_HEK293T_CBirA_P3F_Biotin_C.raw	015_S186536_HEK293T_CBirA_P3F_Biotin_4_C.raw	002_S186542_HEK293T_BirA_Empty_Biotin_4_E.transformed	007_S184702_HEK293T_BirA_Empty_Biotin_E.transformed	012_S186541_HEK293T_BirA_Empty_Biotin_3_E.transformed	014_S186540_HEK293T_BirA_Empty_Biotin_2_E.transformed	004_S186534_HEK293T_CBirA_P3F_Biotin_2_C.transformed	006_S186535_HEK293T_CBirA_P3F_Biotin_3_C.transformed	010_S184706_HEK293T_CBirA_P3F_Biotin_C.transformed	015_S186536_HEK293T_CBirA_P3F_Biotin_4_C.transformed	pseudo.Control	pseudo.Pull	pseudo.log2FC	pseudo.P.Value	pseudo.adj.P.Val
536	sp|P23760|PAX3_HUMAN	sp|P23760|PAX3_HUMAN	42	sp|P23760|PAX3_HUMAN Paired box protein Pax-3 OS=Homo sapiens GN=PAX3 PE=1 SV=2	-0.582037	11.422	sp|P23760|PAX3_HUMAN	12.0041	9.22403	14.7841	5.42	9.55401	1.61286e-06	8.50947e-05	5.61106	0	4669700	10778000	12060000	935580	38249000000	49225000000	47622000000	24179000000	0.787546	0.858548	1.35696	-5.3312	11.4174	11.5164	11.5658	11.1886	-0.582037	11.422	12.0041	1.61286e-06	8.50947e-05
1804	sp|Q92793|CBP_HUMAN	sp|Q92793|CBP_HUMAN	60	sp|Q92793|CBP_HUMAN CREB-binding protein OS=Homo sapiens GN=CREBBP PE=1 SV=3	-4.42426	5.40664	sp|Q92793|CBP_HUMAN	9.83089	7.96222	11.6996	1.1934	11.7982	5.25562e-07	5.90631e-05	6.45026	1	75594	1333400	NA	726380	751900000	633960000	548610000	220100000	-5.33964	-2.20206	NA	-5.73107	6.12312	5.37684	5.36575	4.76084	-4.42426	5.40664	9.83089	5.25562e-07	5.90631e-05
1083	sp|Q12778|FOXO1_HUMAN	sp|Q12778|FOXO1_HUMAN	24	sp|Q12778|FOXO1_HUMAN Forkhead box protein O1 OS=Homo sapiens GN=FOXO1 PE=1 SV=2	0.207713	9.84763	sp|Q12778|FOXO1_HUMAN	9.63992	8.45988	10.82	5.02767	18.0752	2.82685e-09	6.67136e-06	10.6404	0	5923600	6786200	7590300	13274000	12020000000	16635000000	15851000000	7082600000	1.14097	0.181018	0.649405	-1.14054	9.8577	9.98595	10.0378	9.50906	0.207713	9.84763	9.63992	2.82685e-09	6.67136e-06
1703	sp|Q8NEZ4|KMT2C_HUMAN	sp|Q8NEZ4|KMT2C_HUMAN	43	sp|Q8NEZ4|KMT2C_HUMAN Histone-lysine N-methyltransferase 2C OS=Homo sapiens GN=KMT2C PE=1 SV=3	-7.16511	2.40369	sp|Q8NEZ4|KMT2C_HUMAN	9.5688	7.58307	11.5545	0.489929	11.2299	5.61595e-06	0.000139512	3.61246	3	NA	NA	45640	NA	70051000	116450000	34474000	33382000	NA	NA	-7.16511	NA	2.92526	2.98639	1.52211	2.181	-7.16511	2.40369	9.5688	5.61595e-06	0.000139512
433	sp|P11182|ODB2_HUMAN	sp|P11182|ODB2_HUMAN	25	sp|P11182|ODB2_HUMAN Lipoamide acyltransferase component of branched-chain alpha-keto acid dehydrogenase complex, mitochondrial OS=Homo sapiens GN=DBT PE=1 SV=3	-6.27784	3.2348	sp|P11182|ODB2_HUMAN	9.51264	4.70703	14.3182	1.33227	4.61308	0.00201168	0.00718241	-0.92956	3	NA	NA	NA	513890	1306800000	120180000	90471000	7720000	NA	NA	NA	-6.27784	6.86786	3.03087	2.86226	0.178202	-6.27784	3.2348	9.51264	0.00201168	0.00718241
2270	sp|Q9NSC2|SALL1_HUMAN	sp|Q9NSC2|SALL1_HUMAN	17	sp|Q9NSC2|SALL1_HUMAN Sal-like protein 1 OS=Homo sapiens GN=SALL1 PE=1 SV=2	-6.85102	2.38898	sp|Q9NSC2|SALL1_HUMAN	9.23999	7.71681	10.7632	-0.691019	13.835	3.81193e-07	5.81444e-05	6.23625	2	NA	103680	NA	201220	53516000	97639000	42461000	40460000	NA	-5.94281	NA	-7.75922	2.56248	2.73785	1.81155	2.44403	-6.85102	2.38898	9.23999	3.81193e-07	5.81444e-05
1710	sp|Q8NHM5|KDM2B_HUMAN	sp|Q8NHM5|KDM2B_HUMAN	25	sp|Q8NHM5|KDM2B_HUMAN Lysine-specific demethylase 2B OS=Homo sapiens GN=KDM2B PE=1 SV=1	-4.44397	4.11192	sp|Q8NHM5|KDM2B_HUMAN	8.55589	6.19762	10.9142	-0.166023	8.0275	8.23639e-06	0.000173553	4.10466	0	46426	44011	693970	10520000	178360000	292270000	181190000	141000000	-6.06405	-7.19775	-3.00614	-1.50793	4.1845	4.28453	3.82695	4.15171	-4.44397	4.11192	8.55589	8.23639e-06	0.000173553
96	sp|O14497|ARI1A_HUMAN	sp|O14497|ARI1A_HUMAN	54	sp|O14497|ARI1A_HUMAN AT-rich interactive domain-containing protein 1A OS=Homo sapiens GN=ARID1A PE=1 SV=3	-3.80015	4.73924	sp|O14497|ARI1A_HUMAN	8.53939	6.49889	10.5799	1.0795	9.38526	3.97926e-06	0.000121962	4.75145	1	NA	2493300	156910	1279200	459210000	331640000	398580000	137110000	NA	-1.28543	-5.27807	-4.83695	5.45873	4.4628	4.92199	4.11345	-3.80015	4.73924	8.53939	3.97926e-06	0.000121962
1705	sp|Q8NFD5|ARI1B_HUMAN	sp|Q8NFD5|ARI1B_HUMAN	64	sp|Q8NFD5|ARI1B_HUMAN AT-rich interactive domain-containing protein 1B OS=Homo sapiens GN=ARID1B PE=1 SV=2	-3.22637	4.7639	sp|Q8NFD5|ARI1B_HUMAN	7.99027	6.1319	9.84864	2.10048	9.80593	6.14923e-06	0.000148083	4.2179	2	NA	255990	NA	8560200	439240000	448410000	246260000	183930000	NA	-4.6191	NA	-1.83364	5.39882	4.88835	4.25316	4.51528	-3.22637	4.7639	7.99027	6.14923e-06	0.000148083
31	REV__sp|Q8N4C6|NIN_HUMAN	REV__sp|Q8N4C6|NIN_HUMAN	2	sp|Q8N4C6|NIN_HUMAN Ninein OS=Homo sapiens GN=NIN PE=1 SV=4	-5.65895	2.23078	REV__sp|Q8N4C6|NIN_HUMAN	7.88974	6.15746	9.62202	-0.399129	10.3873	3.89103e-06	0.000121962	4.57963	2	72508	NA	NA	646010	67732000	71974000	103730000	11169000	-5.40157	NA	NA	-5.91634	2.8799	2.30763	3.05222	0.683385	-5.65895	2.23078	7.88974	3.89103e-06	0.000121962
2593	sp|Q9Y6Q9|NCOA3_HUMAN	sp|Q9Y6Q9|NCOA3_HUMAN	32	sp|Q9Y6Q9|NCOA3_HUMAN Nuclear receptor coactivator 3 OS=Homo sapiens GN=NCOA3 PE=1 SV=1	-4.44118	3.27037	sp|Q9Y6Q9|NCOA3_HUMAN	7.71155	6.37895	9.04414	0.699856	13.1978	5.61075e-07	6.01881e-05	5.98281	2	NA	184140	NA	2496100	76148000	147900000	128190000	79843000	NA	-5.10159	NA	-3.78076	3.0377	3.32365	3.34631	3.37382	-4.44118	3.27037	7.71155	5.61075e-07	6.01881e-05
2444	sp|Q9ULL5|PRR12_HUMAN	sp|Q9ULL5|PRR12_HUMAN	19	sp|Q9ULL5|PRR12_HUMAN Proline-rich protein 12 OS=Homo sapiens GN=PRR12 PE=1 SV=2	NA	2.29762	sp|Q9ULL5|PRR12_HUMAN	NA	NA	NA	2.29762	NA	NA	NA	NA	4	NA	NA	NA	NA	37396000	89559000	45794000	44637000	NA	NA	NA	NA	2.07956	2.616	1.91651	2.57842	-5.2973	2.29762	7.59492	0	0
1047	sp|Q04727|TLE4_HUMAN	sp|Q04727|TLE4_HUMAN	20	sp|Q04727|TLE4_HUMAN Transducin-like enhancer protein 4 OS=Homo sapiens GN=TLE4 PE=1 SV=3	NA	2.27069	sp|Q04727|TLE4_HUMAN	NA	NA	NA	2.27069	NA	NA	NA	NA	4	NA	NA	NA	NA	43597000	104480000	39332000	35312000	NA	NA	NA	NA	2.28628	2.83338	1.70522	2.25788	-5.2973	2.27069	7.56799	0	0
1103	sp|Q12948|FOXC1_HUMAN	sp|Q12948|FOXC1_HUMAN	13	sp|Q12948|FOXC1_HUMAN Forkhead box protein C1 OS=Homo sapiens GN=FOXC1 PE=1 SV=3	-4.03706	3.42354	sp|Q12948|FOXC1_HUMAN	7.4606	5.70642	9.21477	0.93667	9.69976	6.70196e-06	0.000153559	4.14868	2	77665	NA	NA	4718700	68026000	230970000	150470000	74935000	-5.29948	NA	NA	-2.77465	2.88573	3.95247	3.56889	3.28705	-4.03706	3.42354	7.4606	6.70196e-06	0.000153559
2578	sp|Q9Y618|NCOR2_HUMAN	sp|Q9Y618|NCOR2_HUMAN	61	sp|Q9Y618|NCOR2_HUMAN Nuclear receptor corepressor 2 OS=Homo sapiens GN=NCOR2 PE=1 SV=2	-3.43535	3.9351	sp|Q9Y618|NCOR2_HUMAN	7.37045	5.78004	8.96087	0.249871	10.254	8.18106e-07	7.08586e-05	6.21824	0	64179	1593000	491200	5001200	206590000	271260000	167670000	84997000	-5.58288	-1.94153	-3.53422	-2.68278	4.38247	4.17929	3.71923	3.45939	-3.43535	3.9351	7.37045	8.18106e-07	7.08586e-05
109	sp|O14686|KMT2D_HUMAN	sp|O14686|KMT2D_HUMAN	41	sp|O14686|KMT2D_HUMAN Histone-lysine N-methyltransferase 2D OS=Homo sapiens GN=KMT2D PE=1 SV=2	NA	1.94618	sp|O14686|KMT2D_HUMAN	NA	NA	NA	1.94618	NA	NA	NA	NA	4	NA	NA	NA	NA	121180000	65575000	33948000	9375800	NA	NA	NA	NA	3.6637	2.17628	1.50075	0.443998	-5.2973	1.94618	7.24348	0	0
1102	sp|Q12931|TRAP1_HUMAN	sp|Q12931|TRAP1_HUMAN	7	sp|Q12931|TRAP1_HUMAN Heat shock protein 75 kDa, mitochondrial OS=Homo sapiens GN=TRAP1 PE=1 SV=3	-7.77478	-0.546391	sp|Q12931|TRAP1_HUMAN	7.22839	5.5921	8.86468	-1.99207	10.2948	1.04381e-05	0.000194338	3.23492	3	NA	NA	30625	NA	5368200	9874300	6993900	4835800	NA	NA	-7.77478	NA	-0.535817	-0.494516	-0.693599	-0.461631	-7.77478	-0.546391	7.22839	1.04381e-05	0.000194338
563	sp|P27540|ARNT_HUMAN	sp|P27540|ARNT_HUMAN	16	sp|P27540|ARNT_HUMAN Aryl hydrocarbon receptor nuclear translocator OS=Homo sapiens GN=ARNT PE=1 SV=1	NA	1.91572	sp|P27540|ARNT_HUMAN	NA	NA	NA	1.91572	NA	NA	NA	NA	4	NA	NA	NA	NA	23063000	59088000	51018000	32365000	NA	NA	NA	NA	1.42832	2.02934	2.06656	2.13868	-5.2973	1.91572	7.21302	0	0
2398	sp|Q9UHF7|TRPS1_HUMAN	sp|Q9UHF7|TRPS1_HUMAN	24	sp|Q9UHF7|TRPS1_HUMAN Zinc finger transcription factor Trps1 OS=Homo sapiens GN=TRPS1 PE=1 SV=2	-4.71776	2.39307	sp|Q9UHF7|TRPS1_HUMAN	7.11083	5.74725	8.47441	0.0227961	11.8932	1.30975e-06	8.13424e-05	5.39515	2	NA	348620	NA	973310	40696000	98148000	45279000	49970000	NA	-4.16678	NA	-5.26873	2.1935	2.74519	1.9008	2.7328	-4.71776	2.39307	7.11083	1.30975e-06	8.13424e-05
2194	sp|Q9HAH7|FBRS_HUMAN	sp|Q9HAH7|FBRS_HUMAN	11	sp|Q9HAH7|FBRS_HUMAN Probable fibrosin-1 OS=Homo sapiens GN=FBRS PE=1 SV=3	-4.83151	2.20965	sp|Q9HAH7|FBRS_HUMAN	7.04115	5.34477	8.73754	0.801417	9.67293	1.62144e-05	0.000246877	2.94991	3	NA	221430	NA	NA	35185000	91105000	52484000	31350000	NA	-4.83151	NA	NA	1.99744	2.64014	2.10591	2.0951	-4.83151	2.20965	7.04115	1.62144e-05	0.000246877
823	sp|P53539|FOSB_HUMAN	sp|P53539|FOSB_HUMAN	3	sp|P53539|FOSB_HUMAN Protein fosB OS=Homo sapiens GN=FOSB PE=2 SV=1	-8.35337	-1.36037	sp|P53539|FOSB_HUMAN	6.993	5.01362	8.97238	-2.75897	8.23327	4.97536e-05	0.000517263	2.16425	3	NA	NA	NA	138150	2667100	3402000	3704100	5099500	NA	NA	NA	-8.35337	-1.47832	-1.99771	-1.57645	-0.389004	-8.35337	-1.36037	6.993	4.97536e-05	0.000517263
151	sp|O15550|KDM6A_HUMAN	sp|O15550|KDM6A_HUMAN	21	sp|O15550|KDM6A_HUMAN Lysine-specific demethylase 6A OS=Homo sapiens GN=KDM6A PE=1 SV=2	-4.99952	1.94802	sp|O15550|KDM6A_HUMAN	6.94754	5.59351	8.30158	-0.367823	11.702	1.49342e-06	8.23941e-05	5.30038	2	NA	187330	NA	1211700	52690000	74141000	29164000	22011000	NA	-5.07643	NA	-4.9226	2.54152	2.34948	1.28977	1.61133	-4.99952	1.94802	6.94754	1.49342e-06	8.23941e-05
1462	sp|Q6N021|TET2_HUMAN	sp|Q6N021|TET2_HUMAN	23	sp|Q6N021|TET2_HUMAN Methylcytosine dioxygenase TET2 OS=Homo sapiens GN=TET2 PE=1 SV=3	NA	1.63381	sp|Q6N021|TET2_HUMAN	NA	NA	NA	1.63381	NA	NA	NA	NA	4	NA	NA	NA	NA	36701000	53379000	38738000	13190000	NA	NA	NA	NA	2.05428	1.88599	1.68409	0.91088	-5.2973	1.63381	6.93111	0	0
1826	sp|Q93074|MED12_HUMAN	sp|Q93074|MED12_HUMAN	21	sp|Q93074|MED12_HUMAN Mediator of RNA polymerase II transcription subunit 12 OS=Homo sapiens GN=MED12 PE=1 SV=4	-5.9945	0.913605	sp|Q93074|MED12_HUMAN	6.90811	5.48627	8.32994	-2.04701	10.896	1.07037e-06	7.08586e-05	5.87204	1	NA	145510	48923	852500	21704000	17773000	42820000	7562900	NA	-5.44642	-7.05897	-5.47812	1.34649	0.334609	1.82324	0.15008	-5.9945	0.913605	6.90811	1.07037e-06	7.08586e-05
1736	sp|Q8TE76|MORC4_HUMAN	sp|Q8TE76|MORC4_HUMAN	26	sp|Q8TE76|MORC4_HUMAN MORC family CW-type zinc finger protein 4 OS=Homo sapiens GN=MORC4 PE=1 SV=2	NA	1.59602	sp|Q8TE76|MORC4_HUMAN	NA	NA	NA	1.59602	NA	NA	NA	NA	4	NA	NA	NA	NA	15629000	37739000	57159000	26375000	NA	NA	NA	NA	0.904048	1.39688	2.22443	1.85874	-5.2973	1.59602	6.89332	0	0
1763	sp|Q8WWQ0|PHIP_HUMAN	sp|Q8WWQ0|PHIP_HUMAN	13	sp|Q8WWQ0|PHIP_HUMAN PH-interacting protein OS=Homo sapiens GN=PHIP PE=1 SV=2	-5.96328	0.871692	sp|Q8WWQ0|PHIP_HUMAN	6.83497	5.54036	8.12957	-2.05758	11.8401	5.0908e-07	5.90631e-05	6.47565	1	NA	171530	134250	292550	12016000	34822000	21769000	11899000	NA	-5.20548	-5.51641	-7.16794	0.549835	1.28339	0.883551	0.769986	-5.96328	0.871692	6.83497	5.0908e-07	5.90631e-05
110	sp|O14715|RGPD8_HUMAN;sp|Q99666|RGPD5_HUMAN	sp|O14715|RGPD8_HUMAN	45	sp|O14715|RGPD8_HUMAN RANBP2-like and GRIP domain-containing protein 8 OS=Homo sapiens GN=RGPD8 PE=1 SV=2;sp|Q99666|RGPD5_HUMAN RANBP2-like and GRIP domain-containing protein 5/6 OS=Homo sapiens GN=RGPD5 PE=1 SV=3	-5.39097	1.42222	sp|O14715|RGPD8_HUMAN	6.81319	3.94417	9.6822	-0.848847	5.41598	0.000506571	0.00259613	0.290453	2	NA	636360	NA	237620	39222000	91165000	34706000	4283800	NA	-3.28543	NA	-7.49651	2.14379	2.64107	1.53142	-0.627422	-5.39097	1.42222	6.81319	0.000506571	0.00259613
633	sp|P35453|HXD13_HUMAN	sp|P35453|HXD13_HUMAN	13	sp|P35453|HXD13_HUMAN Homeobox protein Hox-D13 OS=Homo sapiens GN=HOXD13 PE=1 SV=3	-3.76557	3.03836	sp|P35453|HXD13_HUMAN	6.80393	4.91755	8.69031	1.67757	8.40562	4.31447e-05	0.000482566	2.26874	3	NA	NA	422190	NA	52873000	164010000	71223000	94735000	NA	NA	-3.76557	NA	2.54619	3.46951	2.52999	3.60775	-3.76557	3.03836	6.80393	4.31447e-05	0.000482566
2217	sp|Q9HCM7|FBSL_HUMAN	sp|Q9HCM7|FBSL_HUMAN	8	sp|Q9HCM7|FBSL_HUMAN Fibrosin-1-like protein OS=Homo sapiens GN=FBRSL1 PE=1 SV=4	-5.38088	1.36792	sp|Q9HCM7|FBSL_HUMAN	6.74879	4.84847	8.64912	0.0181571	8.2763	4.80032e-05	0.000512613	2.19063	3	NA	152170	NA	NA	25311000	47113000	39986000	9626200	NA	-5.38088	NA	NA	1.55364	1.70984	1.72813	0.48005	-5.38088	1.36792	6.74879	4.80032e-05	0.000512613
535	sp|P23759|PAX7_HUMAN	sp|P23759|PAX7_HUMAN	20	sp|P23759|PAX7_HUMAN Paired box protein Pax-7 OS=Homo sapiens GN=PAX7 PE=1 SV=4	NA	1.36776	sp|P23759|PAX7_HUMAN	NA	NA	NA	1.36776	NA	NA	NA	NA	4	NA	NA	NA	NA	27990000	83029000	21284000	9215400	NA	NA	NA	NA	1.6892	2.5092	0.852255	0.420395	-5.2973	1.36776	6.66506	0	0
1088	sp|Q12824|SNF5_HUMAN	sp|Q12824|SNF5_HUMAN	9	sp|Q12824|SNF5_HUMAN SWI/SNF-related matrix-associated actin-dependent regulator of chromatin subfamily B member 1 OS=Homo sapiens GN=SMARCB1 PE=1 SV=2	-5.9889	0.636205	sp|Q12824|SNF5_HUMAN	6.62511	3.58884	9.66137	-0.688816	5.085	0.00113332	0.00463542	-0.410699	3	NA	NA	NA	617010	54239000	16809000	21899000	2852800	NA	NA	NA	-5.9889	2.58056	0.255941	0.891822	-1.1835	-5.9889	0.636205	6.62511	0.00113332	0.00463542
1036	sp|Q02930|CREB5_HUMAN	sp|Q02930|CREB5_HUMAN	10	sp|Q02930|CREB5_HUMAN Cyclic AMP-responsive element-binding protein 5 OS=Homo sapiens GN=CREB5 PE=1 SV=3	NA	1.26994	sp|Q02930|CREB5_HUMAN	NA	NA	NA	1.26994	NA	NA	NA	NA	4	NA	NA	NA	NA	15391000	35175000	34370000	18598000	NA	NA	NA	NA	0.883372	1.29762	1.51791	1.38086	-5.2973	1.26994	6.56724	0	0
896	sp|P61962|DCAF7_HUMAN	sp|P61962|DCAF7_HUMAN	13	sp|P61962|DCAF7_HUMAN DDB1- and CUL4-associated factor 7 OS=Homo sapiens GN=DCAF7 PE=1 SV=1	-2.5754	3.99123	sp|P61962|DCAF7_HUMAN	6.56663	4.98177	8.1515	0.707912	9.16768	2.38731e-06	9.88432e-05	5.25457	0	173520	1602000	497740	17003000	86009000	243380000	266480000	165890000	-4.10496	-1.93328	-3.51401	-0.749375	3.20178	4.0263	4.36276	4.37408	-2.5754	3.99123	6.56663	2.38731e-06	9.88432e-05
2072	sp|Q9BXF3|CECR2_HUMAN	sp|Q9BXF3|CECR2_HUMAN	16	sp|Q9BXF3|CECR2_HUMAN Cat eye syndrome critical region protein 2 OS=Homo sapiens GN=CECR2 PE=1 SV=2	NA	1.21756	sp|Q9BXF3|CECR2_HUMAN	NA	NA	NA	1.21756	NA	NA	NA	NA	4	NA	NA	NA	NA	21690000	31407000	16827000	26418000	NA	NA	NA	NA	1.34562	1.13778	0.525878	1.86097	-5.2973	1.21756	6.51486	0	0
296	sp|O94953|KDM4B_HUMAN	sp|O94953|KDM4B_HUMAN	4	sp|O94953|KDM4B_HUMAN Lysine-specific demethylase 4B OS=Homo sapiens GN=KDM4B PE=1 SV=4	-9.29134	-2.82552	sp|O94953|KDM4B_HUMAN	6.46581	4.69356	8.23807	-4.11869	8.50228	3.98722e-05	0.000460449	2.32601	3	NA	NA	NA	76300	886640	1323300	2168600	948250	NA	NA	NA	-9.29134	-2.9622	-3.32973	-2.32007	-2.6901	-9.29134	-2.82552	6.46581	3.98722e-05	0.000460449
1295	sp|Q15652|JHD2C_HUMAN	sp|Q15652|JHD2C_HUMAN	71	sp|Q15652|JHD2C_HUMAN Probable JmjC domain-containing histone demethylation protein 2C OS=Homo sapiens GN=JMJD1C PE=1 SV=2	-1.19656	5.12689	sp|Q15652|JHD2C_HUMAN	6.32345	4.68823	7.95867	1.96516	8.55631	4.56493e-06	0.000128431	4.65697	0	2537900	968140	929180	39025000	334000000	658450000	525690000	216930000	-0.11851	-2.67088	-2.56012	0.563269	5.02976	5.43031	5.30648	4.741	-1.19656	5.12689	6.32345	4.56493e-06	0.000128431
84	sp|O00512|BCL9_HUMAN	sp|O00512|BCL9_HUMAN	21	sp|O00512|BCL9_HUMAN B-cell CLL/lymphoma 9 protein OS=Homo sapiens GN=BCL9 PE=1 SV=4	-2.95519	3.3257	sp|O00512|BCL9_HUMAN	6.28088	4.80472	7.75705	1.23207	9.70388	6.67949e-06	0.000153559	4.15139	2	NA	1492400	NA	2354100	103370000	172080000	121670000	62654000	NA	-2.03707	NA	-3.8733	3.44951	3.53726	3.2738	3.04221	-2.95519	3.3257	6.28088	6.67949e-06	0.000153559
978	sp|P78337|PITX1_HUMAN	sp|P78337|PITX1_HUMAN	12	sp|P78337|PITX1_HUMAN Pituitary homeobox 1 OS=Homo sapiens GN=PITX1 PE=1 SV=2	-4.45833	1.8181	sp|P78337|PITX1_HUMAN	6.27644	4.52232	8.03055	0.562814	8.33862	4.55895e-05	0.000495812	2.22849	3	NA	285690	NA	NA	20152000	52753000	54261000	29338000	NA	-4.45833	NA	NA	1.24652	1.86935	2.15216	2.00437	-4.45833	1.8181	6.27644	4.55895e-05	0.000495812
1800	sp|Q92766|RREB1_HUMAN	sp|Q92766|RREB1_HUMAN	30	sp|Q92766|RREB1_HUMAN Ras-responsive element-binding protein 1 OS=Homo sapiens GN=RREB1 PE=1 SV=3	-3.5984	2.65923	sp|Q92766|RREB1_HUMAN	6.25762	5.04949	7.46576	0.573355	11.8129	1.38371e-06	8.21368e-05	5.3556	2	NA	NA	435840	3019800	75014000	86348000	63238000	48435000	NA	NA	-3.71695	-3.47985	3.01749	2.56449	2.36482	2.69012	-3.5984	2.65923	6.25762	1.38371e-06	8.21368e-05
2406	sp|Q9UIF9|BAZ2A_HUMAN	sp|Q9UIF9|BAZ2A_HUMAN	21	sp|Q9UIF9|BAZ2A_HUMAN Bromodomain adjacent to zinc finger domain protein 2A OS=Homo sapiens GN=BAZ2A PE=1 SV=4	NA	0.955493	sp|Q9UIF9|BAZ2A_HUMAN	NA	NA	NA	0.955493	NA	NA	NA	NA	4	NA	NA	NA	NA	15097000	50350000	36876000	4860500	NA	NA	NA	NA	0.857385	1.80358	1.61566	-0.454662	-5.2973	0.955493	6.25279	0	0
2023	sp|Q9BR77|CCD77_HUMAN	sp|Q9BR77|CCD77_HUMAN	22	sp|Q9BR77|CCD77_HUMAN Coiled-coil domain-containing protein 77 OS=Homo sapiens GN=CCDC77 PE=2 SV=1	NA	0.932746	sp|Q9BR77|CCD77_HUMAN	NA	NA	NA	0.932746	NA	NA	NA	NA	4	NA	NA	NA	NA	3046900	20882000	61707000	32328000	NA	NA	NA	NA	-1.29893	0.562022	2.33078	2.13712	-5.2973	0.932746	6.23004	0	0
2227	sp|Q9NP66|HM20A_HUMAN	sp|Q9NP66|HM20A_HUMAN	4	sp|Q9NP66|HM20A_HUMAN High mobility group protein 20A OS=Homo sapiens GN=HMG20A PE=1 SV=1	-8.39779	-2.19589	sp|Q9NP66|HM20A_HUMAN	6.2019	2.40235	10.0015	-3.43627	3.80391	0.00580682	0.0167532	-1.9109	3	NA	NA	NA	134320	199950	10880000	6314800	997070	NA	NA	NA	-8.39779	-4.96896	-0.357692	-0.835476	-2.62143	-8.39779	-2.19589	6.2019	0.00580682	0.0167532
1288	sp|Q15596|NCOA2_HUMAN	sp|Q15596|NCOA2_HUMAN	30	sp|Q15596|NCOA2_HUMAN Nuclear receptor coactivator 2 OS=Homo sapiens GN=NCOA2 PE=1 SV=2	-1.79693	4.38672	sp|Q15596|NCOA2_HUMAN	6.18365	4.41339	7.95391	1.29489	7.72888	1.16437e-05	0.000206609	3.77735	0	279990	9435200	671240	11261000	197780000	358750000	317630000	130210000	-3.394	0.663673	-3.05703	-1.40038	4.32375	4.57365	4.60666	4.04282	-1.79693	4.38672	6.18365	1.16437e-05	0.000206609
123	sp|O15014|ZN609_HUMAN	sp|O15014|ZN609_HUMAN	21	sp|O15014|ZN609_HUMAN Zinc finger protein 609 OS=Homo sapiens GN=ZNF609 PE=1 SV=2	-3.37279	2.81017	sp|O15014|ZN609_HUMAN	6.18297	4.92398	7.44195	0.160329	11.0137	9.72757e-07	7.08586e-05	5.95103	1	NA	746510	268660	5235400	67178000	139450000	81520000	39571000	NA	-3.05162	-4.45629	-2.61047	2.86883	3.24066	2.71755	2.41364	-3.37279	2.81017	6.18297	9.72757e-07	7.08586e-05
2036	sp|Q9BSM1|PCGF1_HUMAN	sp|Q9BSM1|PCGF1_HUMAN	11	sp|Q9BSM1|PCGF1_HUMAN Polycomb group RING finger protein 1 OS=Homo sapiens GN=PCGF1 PE=1 SV=2	-2.88584	3.26676	sp|Q9BSM1|PCGF1_HUMAN	6.1526	4.92778	7.37742	0.190461	11.1146	3.73703e-07	5.81444e-05	6.90218	0	234820	1210700	388830	9596200	83623000	145630000	144180000	64965000	-3.65542	-2.34344	-3.89135	-1.65314	3.16387	3.30183	3.50958	3.09176	-2.88584	3.26676	6.1526	3.73703e-07	5.81444e-05
2201	sp|Q9HBE1|PATZ1_HUMAN	sp|Q9HBE1|PATZ1_HUMAN	10	sp|Q9HBE1|PATZ1_HUMAN POZ-, AT hook-, and zinc finger-containing protein 1 OS=Homo sapiens GN=PATZ1 PE=1 SV=1	NA	0.789314	sp|Q9HBE1|PATZ1_HUMAN	NA	NA	NA	0.789314	NA	NA	NA	NA	4	NA	NA	NA	NA	5765500	24057000	40202000	15141000	NA	NA	NA	NA	-0.439615	0.761689	1.73561	1.09957	-5.2973	0.789314	6.08661	0	0
1951	sp|Q96RN5|MED15_HUMAN	sp|Q96RN5|MED15_HUMAN	11	sp|Q96RN5|MED15_HUMAN Mediator of RNA polymerase II transcription subunit 15 OS=Homo sapiens GN=MED15 PE=1 SV=2	NA	0.786249	sp|Q96RN5|MED15_HUMAN	NA	NA	NA	0.786249	NA	NA	NA	NA	4	NA	NA	NA	NA	14344000	50820000	24222000	4729600	NA	NA	NA	NA	0.788447	1.81669	1.03186	-0.492005	-5.2973	0.786249	6.08355	0	0
2155	sp|Q9H4W6|COE3_HUMAN	sp|Q9H4W6|COE3_HUMAN	11	sp|Q9H4W6|COE3_HUMAN Transcription factor COE3 OS=Homo sapiens GN=EBF3 PE=1 SV=2	-5.37456	0.703168	sp|Q9H4W6|COE3_HUMAN	6.07773	4.05543	8.10002	-2.3357	6.64975	4.43035e-05	0.000488581	2.49427	0	23588	46507	248040	4845500	8983500	16033000	30429000	15332000	-7.07021	-7.11696	-4.57832	-2.73275	0.157948	0.189264	1.34874	1.11672	-5.37456	0.703168	6.07773	4.43035e-05	0.000488581
1298	sp|Q15699|ALX1_HUMAN	sp|Q15699|ALX1_HUMAN	12	sp|Q15699|ALX1_HUMAN ALX homeobox protein 1 OS=Homo sapiens GN=ALX1 PE=1 SV=2	-4.65185	1.42093	sp|Q15699|ALX1_HUMAN	6.07278	3.2675	8.87807	0.206378	5.04486	0.00118854	0.00481196	-0.453306	3	NA	NA	NA	1438200	6912900	23591000	64335000	50825000	NA	NA	NA	-4.65185	-0.195068	0.734094	2.38871	2.756	-4.65185	1.42093	6.07278	0.00118854	0.00481196
1511	sp|Q6ZW49|PAXI1_HUMAN	sp|Q6ZW49|PAXI1_HUMAN	19	sp|Q6ZW49|PAXI1_HUMAN PAX-interacting protein 1 OS=Homo sapiens GN=PAXIP1 PE=1 SV=2	-4.35512	1.71226	sp|Q6ZW49|PAXI1_HUMAN	6.06738	4.62295	7.51181	-0.888049	9.42022	3.85268e-06	0.000121962	4.77979	1	90538	260510	NA	3175700	58821000	58496000	35670000	10315000	-5.07159	-4.59346	NA	-3.40031	2.68983	2.01513	1.56948	0.574583	-4.35512	1.71226	6.06738	3.85268e-06	0.000121962
1039	sp|Q03112|EVI1_HUMAN	sp|Q03112|EVI1_HUMAN	12	sp|Q03112|EVI1_HUMAN MDS1 and EVI1 complex locus protein EVI1 OS=Homo sapiens GN=MECOM PE=1 SV=2	NA	0.768233	sp|Q03112|EVI1_HUMAN	NA	NA	NA	0.768233	NA	NA	NA	NA	4	NA	NA	NA	NA	18882000	25306000	14399000	11913000	NA	NA	NA	NA	1.15881	0.833091	0.309434	0.771595	-5.2973	0.768233	6.06553	0	0
334	sp|O95785|WIZ_HUMAN	sp|O95785|WIZ_HUMAN	24	sp|O95785|WIZ_HUMAN Protein Wiz OS=Homo sapiens GN=WIZ PE=1 SV=2	-3.16795	2.85663	sp|O95785|WIZ_HUMAN	6.02458	3.66126	8.3879	0.848436	5.81385	0.000310891	0.00182513	0.754845	2	NA	NA	161890	13571000	112570000	102080000	62472000	49275000	NA	NA	-5.23032	-1.10558	3.56439	2.8006	2.34789	2.71364	-3.16795	2.85663	6.02458	0.000310891	0.00182513
1949	sp|Q96RK0|CIC_HUMAN	sp|Q96RK0|CIC_HUMAN	24	sp|Q96RK0|CIC_HUMAN Protein capicua homolog OS=Homo sapiens GN=CIC PE=1 SV=2	-3.49493	2.48565	sp|Q96RK0|CIC_HUMAN	5.98058	3.68225	8.2789	0.492126	5.9346	0.000269203	0.00163321	0.890789	2	NA	2138900	NA	851550	39595000	91265000	108820000	29777000	NA	-1.50997	NA	-5.47989	2.15654	2.64262	3.11876	2.02468	-3.49493	2.48565	5.98058	0.000269203	0.00163321
1565	sp|Q86TX2|ACOT1_HUMAN;sp|P49753|ACOT2_HUMAN	sp|Q86TX2|ACOT1_HUMAN	18	sp|Q86TX2|ACOT1_HUMAN Acyl-coenzyme A thioesterase 1 OS=Homo sapiens GN=ACOT1 PE=1 SV=1;sp|P49753|ACOT2_HUMAN Acyl-coenzyme A thioesterase 2, mitochondrial OS=Homo sapiens GN=ACOT2 PE=1 SV=6	-2.6312	3.32799	sp|Q86TX2|ACOT1_HUMAN	5.95919	4.70884	7.20954	0.348395	10.5454	6.23688e-07	6.13294e-05	6.45724	0	531980	649770	871710	6910100	40532000	203250000	88700000	184160000	-2.44025	-3.25489	-2.65769	-2.17197	2.18806	3.77211	2.8348	4.51699	-2.6312	3.32799	5.95919	6.23688e-07	6.13294e-05
91	sp|O00712|NFIB_HUMAN	sp|O00712|NFIB_HUMAN	8	sp|O00712|NFIB_HUMAN Nuclear factor 1 B-type OS=Homo sapiens GN=NFIB PE=1 SV=2	-5.53911	0.407459	sp|O00712|NFIB_HUMAN	5.94657	4.65938	7.23376	-2.14107	10.3605	1.67317e-06	8.58409e-05	5.49818	1	41625	107560	NA	1581200	6852900	29138000	14669000	9551600	-6.22625	-5.88901	NA	-4.50208	-0.206813	1.032	0.335238	0.469408	-5.53911	0.407459	5.94657	1.67317e-06	8.58409e-05
222	sp|O75030|MITF_HUMAN	sp|O75030|MITF_HUMAN	10	sp|O75030|MITF_HUMAN Microphthalmia-associated transcription factor OS=Homo sapiens GN=MITF PE=1 SV=2	-4.12305	1.8133	sp|O75030|MITF_HUMAN	5.93635	4.24303	7.62968	0.62603	8.16992	5.24622e-05	0.000538308	2.12506	3	NA	NA	NA	2009900	24312000	55855000	53642000	22936000	NA	NA	NA	-4.12305	1.49938	1.94996	2.13622	1.66764	-4.12305	1.8133	5.93635	5.24622e-05	0.000538308
2361	sp|Q9P2D1|CHD7_HUMAN	sp|Q9P2D1|CHD7_HUMAN	124	sp|Q9P2D1|CHD7_HUMAN Chromodomain-helicase-DNA-binding protein 7 OS=Homo sapiens GN=CHD7 PE=1 SV=3	1.16859	7.08101	sp|Q9P2D1|CHD7_HUMAN	5.91242	4.44336	7.38148	4.1248	8.905	3.14057e-06	0.000114027	5.00298	0	2845300	9561800	8287000	201410000	892850000	2216100000	2239300000	1639600000	0.0513787	0.683194	0.783599	3.15619	6.35462	7.14234	7.31944	7.50765	1.16859	7.08101	5.91242	3.14057e-06	0.000114027
2003	sp|Q99856|ARI3A_HUMAN	sp|Q99856|ARI3A_HUMAN	19	sp|Q99856|ARI3A_HUMAN AT-rich interactive domain-containing protein 3A OS=Homo sapiens GN=ARID3A PE=1 SV=2	-2.76431	3.13778	sp|Q99856|ARI3A_HUMAN	5.90209	4.54535	7.25883	0.608317	9.75585	2.83877e-06	0.000113178	5.04578	1	NA	500960	627760	10588000	107710000	116080000	137790000	45937000	NA	-3.63581	-3.15936	-1.49775	3.50493	2.98191	3.44662	2.61769	-2.76431	3.13778	5.90209	2.83877e-06	0.000113178
2443	sp|Q9ULJ6|ZMIZ1_HUMAN	sp|Q9ULJ6|ZMIZ1_HUMAN	8	sp|Q9ULJ6|ZMIZ1_HUMAN Zinc finger MIZ domain-containing protein 1 OS=Homo sapiens GN=ZMIZ1 PE=1 SV=3	NA	0.586637	sp|Q9ULJ6|ZMIZ1_HUMAN	NA	NA	NA	0.586637	NA	NA	NA	NA	4	NA	NA	NA	NA	4740600	32133000	20948000	14599000	NA	NA	NA	NA	-0.703336	1.17002	0.830153	1.04971	-5.2973	0.586637	5.88393	0	0
1700	sp|Q8NEM7|SP20H_HUMAN	sp|Q8NEM7|SP20H_HUMAN	7	sp|Q8NEM7|SP20H_HUMAN Transcription factor SPT20 homolog OS=Homo sapiens GN=SUPT20H PE=1 SV=2	-5.69172	0.190538	sp|Q8NEM7|SP20H_HUMAN	5.88226	4.12099	7.64353	-2.33043	7.48988	2.70434e-05	0.000343131	3.01308	1	94174	NA	267300	222830	18525000	15161000	12685000	4323800	-5.01308	NA	-4.46404	-7.59805	1.13309	0.110374	0.133393	-0.614709	-5.69172	0.190538	5.88226	2.70434e-05	0.000343131
1785	sp|Q92585|MAML1_HUMAN	sp|Q92585|MAML1_HUMAN	26	sp|Q92585|MAML1_HUMAN Mastermind-like protein 1 OS=Homo sapiens GN=MAML1 PE=1 SV=3	-2.05628	3.78535	sp|Q92585|MAML1_HUMAN	5.84164	4.4553	7.22797	0.864533	9.32339	2.03509e-06	9.27641e-05	5.40016	0	416850	695350	1731800	18013000	71882000	251450000	306630000	90909000	-2.80264	-3.15559	-1.6087	-0.658205	2.96002	4.07232	4.5577	3.55137	-2.05628	3.78535	5.84164	2.03509e-06	9.27641e-05
2386	sp|Q9UGU0|TCF20_HUMAN	sp|Q9UGU0|TCF20_HUMAN	83	sp|Q9UGU0|TCF20_HUMAN Transcription factor 20 OS=Homo sapiens GN=TCF20 PE=1 SV=3	0.294055	6.11846	sp|Q9UGU0|TCF20_HUMAN	5.8244	4.23522	7.41359	3.20626	8.10934	7.50333e-06	0.000163962	4.19238	0	2137700	8527800	2091600	121250000	468930000	1209500000	987930000	794110000	-0.373505	0.515583	-1.32024	2.35438	5.48695	6.28811	6.1828	6.51598	0.294055	6.11846	5.8244	7.50333e-06	0.000163962
2205	sp|Q9HC44|GPBL1_HUMAN	sp|Q9HC44|GPBL1_HUMAN	2	sp|Q9HC44|GPBL1_HUMAN Vasculin-like protein 1 OS=Homo sapiens GN=GPBP1L1 PE=1 SV=1	-6.4136	-0.608725	sp|Q9HC44|GPBL1_HUMAN	5.80488	4.09663	7.51313	-2.93068	7.91916	6.49265e-05	0.000600888	2.19139	3	NA	NA	41162	838500	NA	8119000	6181100	5896600	NA	NA	-7.32292	-5.50429	NA	-0.770628	-0.865201	-0.190347	-6.4136	-0.608725	5.80488	6.49265e-05	0.000600888
326	sp|O95677|EYA4_HUMAN	sp|O95677|EYA4_HUMAN	9	sp|O95677|EYA4_HUMAN Eyes absent homolog 4 OS=Homo sapiens GN=EYA4 PE=1 SV=2	-6.1277	-0.346169	sp|O95677|EYA4_HUMAN	5.78153	4.03647	7.52658	-1.50247	7.72097	7.71412e-05	0.000694859	1.83472	3	NA	NA	NA	565120	5632900	14068000	10818000	3692000	NA	NA	NA	-6.1277	-0.470965	0.0048215	-0.0877502	-0.830782	-6.1277	-0.346169	5.78153	7.71412e-05	0.000694859
1650	sp|Q8N488|RYBP_HUMAN	sp|Q8N488|RYBP_HUMAN	3	sp|Q8N488|RYBP_HUMAN RING1 and YY1-binding protein OS=Homo sapiens GN=RYBP PE=1 SV=2	NA	0.338239	sp|Q8N488|RYBP_HUMAN	NA	NA	NA	0.338239	NA	NA	NA	NA	4	NA	NA	NA	NA	4565100	25724000	23867000	8074200	NA	NA	NA	NA	-0.754164	0.856202	1.01135	0.239563	-5.2973	0.338239	5.63554	0	0
249	sp|O75486|SUPT3_HUMAN	sp|O75486|SUPT3_HUMAN	2	sp|O75486|SUPT3_HUMAN Transcription initiation protein SPT3 homolog OS=Homo sapiens GN=SUPT3H PE=1 SV=2	-7.35042	-1.82164	sp|O75486|SUPT3_HUMAN	5.52878	2.16271	8.89486	-3.20383	3.93932	0.00641398	0.0181935	-1.92693	4	NA	NA	NA	260640	471670	12149000	NA	2347400	NA	NA	NA	-7.35042	-3.81262	-0.202064	NA	-1.45022	-7.35042	-1.82164	5.52878	0.00641398	0.0181935
2021	sp|Q9BQP7|MGME1_HUMAN	sp|Q9BQP7|MGME1_HUMAN	8	sp|Q9BQP7|MGME1_HUMAN Mitochondrial genome maintenance exonuclease 1 OS=Homo sapiens GN=MGME1 PE=1 SV=1	NA	0.181017	sp|Q9BQP7|MGME1_HUMAN	NA	NA	NA	0.181017	NA	NA	NA	NA	4	NA	NA	NA	NA	4691700	25914000	10655000	11171000	NA	NA	NA	NA	-0.717307	0.866584	-0.108838	0.68363	-5.2973	0.181017	5.47831	0	0
1994	sp|Q99697|PITX2_HUMAN	sp|Q99697|PITX2_HUMAN	6	sp|Q99697|PITX2_HUMAN Pituitary homeobox 2 OS=Homo sapiens GN=PITX2 PE=1 SV=2	NA	0.173045	sp|Q99697|PITX2_HUMAN	NA	NA	NA	0.173045	NA	NA	NA	NA	4	NA	NA	NA	NA	3587100	13797000	24727000	11584000	NA	NA	NA	NA	-1.07901	-0.0226186	1.06052	0.733288	-5.2973	0.173045	5.47034	0	0
1027	sp|Q01831|XPC_HUMAN	sp|Q01831|XPC_HUMAN	10	sp|Q01831|XPC_HUMAN DNA repair protein complementing XP-C cells OS=Homo sapiens GN=XPC PE=1 SV=4	-4.73388	0.733921	sp|Q01831|XPC_HUMAN	5.4678	4.12841	6.80719	-1.08868	9.31032	9.25448e-06	0.000183705	3.88597	2	79550	339890	NA	NA	12903000	33837000	19190000	8680300	-5.26384	-4.20392	NA	NA	0.645797	1.24292	0.7084	0.338571	-4.73388	0.733921	5.4678	9.25448e-06	0.000183705
368	sp|P05165|PCCA_HUMAN	sp|P05165|PCCA_HUMAN	40	sp|P05165|PCCA_HUMAN Propionyl-CoA carboxylase alpha chain, mitochondrial OS=Homo sapiens GN=PCCA PE=1 SV=4	-1.35018	4.07379	sp|P05165|PCCA_HUMAN	5.42398	3.31245	7.53551	1.3618	5.68368	0.000166092	0.00119314	1.20147	0	872790	874460	1873400	40257000	1027700000	255440000	143100000	32810000	-1.70459	-2.81993	-1.4886	0.612376	6.54414	4.09453	3.49914	2.15736	-1.35018	4.07379	5.42398	0.000166092	0.00119314
1216	sp|Q14687|GSE1_HUMAN	sp|Q14687|GSE1_HUMAN	21	sp|Q14687|GSE1_HUMAN Genetic suppressor element 1 OS=Homo sapiens GN=GSE1 PE=1 SV=3	-3.25931	2.14912	sp|Q14687|GSE1_HUMAN	5.40843	3.85876	6.9581	-0.555092	7.7222	1.17355e-05	0.000206659	3.76989	0	121170	1649500	267060	7498900	34685000	76155000	78451000	21306000	-4.63855	-1.89049	-4.46542	-2.04278	1.97816	2.38729	2.66425	1.5668	-3.25931	2.14912	5.40843	1.17355e-05	0.000206659
2241	sp|Q9NQ88|TIGAR_HUMAN	sp|Q9NQ88|TIGAR_HUMAN	4	sp|Q9NQ88|TIGAR_HUMAN Fructose-2,6-bisphosphatase TIGAR OS=Homo sapiens GN=TIGAR PE=1 SV=1	-3.72175	1.67299	sp|Q9NQ88|TIGAR_HUMAN	5.39474	3.05182	7.73765	-2.37307	5.52242	0.00111119	0.00458256	-0.354763	4	399220	519800	NA	1380400	NA	45898000	NA	NA	-2.86685	-3.58174	NA	-4.71666	NA	1.67299	NA	NA	-3.72175	1.67299	5.39474	0.00111119	0.00458256
2411	sp|Q9UJU2|LEF1_HUMAN	sp|Q9UJU2|LEF1_HUMAN	7	sp|Q9UJU2|LEF1_HUMAN Lymphoid enhancer-binding factor 1 OS=Homo sapiens GN=LEF1 PE=1 SV=1	-6.01462	-0.640213	sp|Q9UJU2|LEF1_HUMAN	5.37441	3.33913	7.40969	-1.7151	6.15382	0.000345717	0.00197552	0.624145	3	NA	98719	NA	NA	4655300	7859700	4209200	8962000	NA	-6.01462	NA	NA	-0.727801	-0.816417	-1.39889	0.382256	-6.01462	-0.640213	5.37441	0.000345717	0.00197552
1420	sp|Q5TGY3|AHDC1_HUMAN	sp|Q5TGY3|AHDC1_HUMAN	12	sp|Q5TGY3|AHDC1_HUMAN AT-hook DNA-binding motif-containing protein 1 OS=Homo sapiens GN=AHDC1 PE=1 SV=1	NA	0.0747204	sp|Q5TGY3|AHDC1_HUMAN	NA	NA	NA	0.0747204	NA	NA	NA	NA	4	NA	NA	NA	NA	6446900	11312000	19113000	7775100	NA	NA	NA	NA	-0.289101	-0.302763	0.702816	0.18793	-5.2973	0.0747204	5.37202	0	0
1854	sp|Q96C36|P5CR2_HUMAN	sp|Q96C36|P5CR2_HUMAN	15	sp|Q96C36|P5CR2_HUMAN Pyrroline-5-carboxylate reductase 2 OS=Homo sapiens GN=PYCR2 PE=1 SV=1	-1.37429	3.95247	sp|Q96C36|P5CR2_HUMAN	5.32676	3.29623	7.35728	2.17688	5.98293	0.000254261	0.00156673	0.944566	2	NA	NA	6033000	3971300	96951000	289250000	227190000	129530000	NA	NA	0.29851	-3.04709	3.36313	4.26988	4.1412	4.03566	-1.37429	3.95247	5.32676	0.000254261	0.00156673
458	sp|P14373|TRI27_HUMAN	sp|P14373|TRI27_HUMAN	6	sp|P14373|TRI27_HUMAN Zinc finger protein RFP OS=Homo sapiens GN=TRIM27 PE=1 SV=1	-7.52104	-2.20145	sp|P14373|TRI27_HUMAN	5.31959	2.23293	8.40626	-3.26536	4.0163	0.00435524	0.0134182	-1.64229	3	NA	NA	NA	233960	3382500	580560	2552700	3117600	NA	NA	NA	-7.52104	-1.15814	-4.49198	-2.09357	-1.06209	-7.52104	-2.20145	5.31959	0.00435524	0.0134182
485	sp|P17544|ATF7_HUMAN	sp|P17544|ATF7_HUMAN	3	sp|P17544|ATF7_HUMAN Cyclic AMP-dependent transcription factor ATF-7 OS=Homo sapiens GN=ATF7 PE=1 SV=2	-6.51883	-1.24182	sp|P17544|ATF7_HUMAN	5.27702	3.03054	7.5235	-2.56107	5.63381	0.000994887	0.00424581	-0.260334	4	NA	NA	NA	441190	2118900	11396000	3526300	NA	NA	NA	NA	-6.51883	-1.78834	-0.292326	-1.64478	NA	-6.51883	-1.24182	5.27702	0.000994887	0.00424581
2090	sp|Q9BZK7|TBL1R_HUMAN	sp|Q9BZK7|TBL1R_HUMAN	15	sp|Q9BZK7|TBL1R_HUMAN F-box-like/WD repeat-containing protein TBL1XR1 OS=Homo sapiens GN=TBL1XR1 PE=1 SV=1	-2.50206	2.7736	sp|Q9BZK7|TBL1R_HUMAN	5.27566	4.10388	6.44745	0.13577	9.96179	1.08089e-06	7.08586e-05	5.97064	0	396650	1013700	598520	12030000	60536000	161450000	54565000	50922000	-2.87645	-2.60353	-3.23225	-1.29602	2.72856	3.44731	2.15992	2.75861	-2.50206	2.7736	5.27566	1.08089e-06	7.08586e-05
1460	sp|Q6KC79|NIPBL_HUMAN	sp|Q6KC79|NIPBL_HUMAN	35	sp|Q6KC79|NIPBL_HUMAN Nipped-B-like protein OS=Homo sapiens GN=NIPBL PE=1 SV=2	-3.9887	1.28167	sp|Q6KC79|NIPBL_HUMAN	5.27037	3.72957	6.81116	-0.977059	7.67102	2.2178e-05	0.000307883	3.19778	1	NA	186400	600530	2702500	50344000	44260000	20349000	8047000	NA	-5.08372	-3.22713	-3.65524	2.48015	1.62172	0.789855	0.234947	-3.9887	1.28167	5.27037	2.2178e-05	0.000307883
701	sp|P43694|GATA4_HUMAN	sp|P43694|GATA4_HUMAN	10	sp|P43694|GATA4_HUMAN Transcription factor GATA-4 OS=Homo sapiens GN=GATA4 PE=1 SV=2	-3.80468	1.42786	sp|P43694|GATA4_HUMAN	5.23254	3.10521	7.35987	0.38135	5.73212	0.000542611	0.00273041	0.238171	3	NA	NA	NA	2458600	15019000	49066000	18401000	40453000	NA	NA	NA	-3.80468	0.850406	1.76714	0.650084	2.4438	-3.80468	1.42786	5.23254	0.000542611	0.00273041
893	sp|P61604|CH10_HUMAN	sp|P61604|CH10_HUMAN	8	sp|P61604|CH10_HUMAN 10 kDa heat shock protein, mitochondrial OS=Homo sapiens GN=HSPE1 PE=1 SV=2	-3.28226	1.94291	sp|P61604|CH10_HUMAN	5.22517	4.00225	6.44808	-0.669675	9.45391	1.78314e-06	8.58817e-05	5.5202	0	274860	462860	727560	4034900	18232000	65380000	27505000	74524000	-3.42148	-3.75166	-2.93391	-3.02199	1.11161	2.17208	1.20841	3.27952	-3.28226	1.94291	5.22517	1.78314e-06	8.58817e-05
420	sp|P0CG40|SP9_HUMAN	sp|P0CG40|SP9_HUMAN	5	sp|P0CG40|SP9_HUMAN Transcription factor Sp9 OS=Homo sapiens GN=SP9 PE=3 SV=1	NA	-0.0756538	sp|P0CG40|SP9_HUMAN	NA	NA	NA	-0.0756538	NA	NA	NA	NA	4	NA	NA	NA	NA	8330000	10502000	5922600	13806000	NA	NA	NA	NA	0.0561852	-0.407575	-0.92454	0.973315	-5.2973	-0.0756538	5.22164	0	0
1569	sp|Q86U70|LDB1_HUMAN	sp|Q86U70|LDB1_HUMAN	7	sp|Q86U70|LDB1_HUMAN LIM domain-binding protein 1 OS=Homo sapiens GN=LDB1 PE=1 SV=2	NA	-0.112571	sp|Q86U70|LDB1_HUMAN	NA	NA	NA	-0.112571	NA	NA	NA	NA	4	NA	NA	NA	NA	9796000	17699000	3963500	9272300	NA	NA	NA	NA	0.274611	0.328723	-1.48243	0.428815	-5.2973	-0.112571	5.18473	0	0
1890	sp|Q96G25|MED8_HUMAN	sp|Q96G25|MED8_HUMAN	5	sp|Q96G25|MED8_HUMAN Mediator of RNA polymerase II transcription subunit 8 OS=Homo sapiens GN=MED8 PE=1 SV=2	-5.16935	0.01036	sp|Q96G25|MED8_HUMAN	5.17971	3.44806	6.91136	-1.02558	6.9708	0.00015318	0.00113128	1.29626	3	NA	NA	NA	1036500	8653600	9703400	14079000	7701000	NA	NA	NA	-5.16935	0.107537	-0.519145	0.278217	0.174832	-5.16935	0.01036	5.17971	0.00015318	0.00113128
1497	sp|Q6W2J9|BCOR_HUMAN	sp|Q6W2J9|BCOR_HUMAN	81	sp|Q6W2J9|BCOR_HUMAN BCL-6 corepressor OS=Homo sapiens GN=BCOR PE=1 SV=1	1.59618	6.77439	sp|Q6W2J9|BCOR_HUMAN	5.17821	4.04741	6.30902	4.18529	10.1321	9.18123e-07	7.08586e-05	6.11599	0	9301500	13531000	7644700	152940000	1051500000	2021500000	1773300000	793280000	1.81147	1.1917	0.660318	2.72123	6.57499	7.01269	6.99535	6.51455	1.59618	6.77439	5.17821	9.18123e-07	7.08586e-05
1480	sp|Q6P4R8|NFRKB_HUMAN	sp|Q6P4R8|NFRKB_HUMAN	14	sp|Q6P4R8|NFRKB_HUMAN Nuclear factor related to kappa-B-binding protein OS=Homo sapiens GN=NFRKB PE=1 SV=2	-4.07364	1.10434	sp|Q6P4R8|NFRKB_HUMAN	5.17798	2.56045	7.7955	-0.621655	4.51158	0.00166942	0.00625369	-0.861577	2	NA	NA	71186	9546000	22650000	30274000	30426000	10347000	NA	NA	-6.48585	-1.66143	1.40397	1.08595	1.34861	0.578819	-4.07364	1.10434	5.17798	0.00166942	0.00625369
1790	sp|Q92618|ZN516_HUMAN	sp|Q92618|ZN516_HUMAN	8	sp|Q92618|ZN516_HUMAN Zinc finger protein 516 OS=Homo sapiens GN=ZNF516 PE=1 SV=1	-6.56033	-1.44337	sp|Q92618|ZN516_HUMAN	5.11696	3.23523	6.9987	-2.46676	6.33712	0.000286122	0.00170517	0.783343	3	NA	68011	NA	NA	4958500	4352500	2737400	2290100	NA	-6.56033	NA	NA	-0.642785	-1.65013	-1.99653	-1.48403	-6.56033	-1.44337	5.11696	0.000286122	0.00170517
1803	sp|Q92785|REQU_HUMAN	sp|Q92785|REQU_HUMAN	12	sp|Q92785|REQU_HUMAN Zinc finger protein ubi-d4 OS=Homo sapiens GN=DPF2 PE=1 SV=2	-4.31922	0.796904	sp|Q92785|REQU_HUMAN	5.11612	3.48937	6.74288	-0.908469	7.17264	6.8235e-05	0.000626594	2.15868	2	NA	342850	270260	NA	37676000	21611000	9575400	11682000	NA	-4.19122	-4.44722	NA	2.08961	0.61043	-0.257229	0.744811	-4.31922	0.796904	5.11612	6.8235e-05	0.000626594
369	sp|P05166|PCCB_HUMAN	sp|P05166|PCCB_HUMAN	27	sp|P05166|PCCB_HUMAN Propionyl-CoA carboxylase beta chain, mitochondrial OS=Homo sapiens GN=PCCB PE=1 SV=3	-2.17673	2.90414	sp|P05166|PCCB_HUMAN	5.08088	1.94794	8.21381	1.21052	3.69868	0.00539487	0.0157573	-2.00866	2	NA	NA	1011600	8088400	757980000	116550000	63264000	7450600	NA	NA	-2.43026	-1.92321	6.13397	2.98761	2.36539	0.129617	-2.17673	2.90414	5.08088	0.00539487	0.0157573
1486	sp|Q6PJG2|EMSA1_HUMAN	sp|Q6PJG2|EMSA1_HUMAN	37	sp|Q6PJG2|EMSA1_HUMAN ELM2 and SANT domain-containing protein 1 OS=Homo sapiens GN=ELMSAN1 PE=1 SV=2	-0.831618	4.24535	sp|Q6PJG2|EMSA1_HUMAN	5.07696	3.46404	6.68989	2.06951	7.05904	4.39801e-05	0.000487291	2.55626	1	NA	1257700	8666600	13975000	132410000	349690000	207350000	202440000	NA	-2.28766	0.852041	-1.05923	3.78311	4.53757	4.01427	4.64644	-0.831618	4.24535	5.07696	4.39801e-05	0.000487291
1117	sp|Q13111|CAF1A_HUMAN	sp|Q13111|CAF1A_HUMAN	21	sp|Q13111|CAF1A_HUMAN Chromatin assembly factor 1 subunit A OS=Homo sapiens GN=CHAF1A PE=1 SV=2	-2.81916	2.24875	sp|Q13111|CAF1A_HUMAN	5.06791	3.6016	6.53423	-0.285206	7.64734	1.28198e-05	0.000219237	3.68596	0	128950	724150	1162700	11144000	25260000	93223000	50382000	49591000	-4.54608	-3.09616	-2.21752	-1.41689	1.55092	2.67256	2.04914	2.72238	-2.81916	2.24875	5.06791	1.28198e-05	0.000219237
378	sp|P05549|AP2A_HUMAN	sp|P05549|AP2A_HUMAN	16	sp|P05549|AP2A_HUMAN Transcription factor AP-2-alpha OS=Homo sapiens GN=TFAP2A PE=1 SV=1	-2.54819	2.4907	sp|P05549|AP2A_HUMAN	5.03889	3.20865	6.86912	1.48292	6.41602	0.000264062	0.0016103	0.850327	3	NA	NA	NA	5445900	42852000	117200000	44811000	53178000	NA	NA	NA	-2.54819	2.26305	2.99545	1.88637	2.81791	-2.54819	2.4907	5.03889	0.000264062	0.0016103
2354	sp|Q9P0W2|HM20B_HUMAN	sp|Q9P0W2|HM20B_HUMAN	6	sp|Q9P0W2|HM20B_HUMAN SWI/SNF-related matrix-associated actin-dependent regulator of chromatin subfamily E member 1-related OS=Homo sapiens GN=HMG20B PE=1 SV=1	NA	-0.258835	sp|Q9P0W2|HM20B_HUMAN	NA	NA	NA	-0.258835	NA	NA	NA	NA	4	NA	NA	NA	NA	1924100	20674000	9649300	10368000	NA	NA	NA	NA	-1.91828	0.5479	-0.24655	0.581593	-5.2973	-0.258835	5.03846	0	0
1864	sp|Q96DF8|DGC14_HUMAN	sp|Q96DF8|DGC14_HUMAN	22	sp|Q96DF8|DGC14_HUMAN Protein DGCR14 OS=Homo sapiens GN=DGCR14 PE=1 SV=1	-1.8252	3.19749	sp|Q96DF8|DGC14_HUMAN	5.0227	3.66026	6.38514	1.04491	8.26753	1.18216e-05	0.000206659	3.77685	1	NA	2698300	636100	13056000	66837000	113980000	174640000	70112000	NA	-1.1697	-3.1392	-1.16671	2.86197	2.95615	3.77581	3.19605	-1.8252	3.19749	5.0227	1.18216e-05	0.000206659
1444	sp|Q68CZ1|FTM_HUMAN	sp|Q68CZ1|FTM_HUMAN	12	sp|Q68CZ1|FTM_HUMAN Protein fantom OS=Homo sapiens GN=RPGRIP1L PE=1 SV=2	-7.77897	-2.77005	sp|Q68CZ1|FTM_HUMAN	5.00892	0.734851	9.283	-3.77183	2.73112	0.0272587	0.0586957	-3.36625	3	NA	NA	NA	198720	72492	6033300	2593000	2292000	NA	NA	NA	-7.77897	-6.33601	-1.18948	-2.07181	-1.48289	-7.77897	-2.77005	5.00892	0.0272587	0.0586957
2177	sp|Q9H8E8|CSR2B_HUMAN	sp|Q9H8E8|CSR2B_HUMAN	6	sp|Q9H8E8|CSR2B_HUMAN Cysteine-rich protein 2-binding protein OS=Homo sapiens GN=CSRP2BP PE=1 SV=3	-5.55764	-0.57385	sp|Q9H8E8|CSR2B_HUMAN	4.98379	2.60927	7.35831	-2.70976	4.70696	0.000945243	0.00404859	-0.420624	1	NA	296860	303300	172800	21745000	6088700	8866100	1455800	NA	-4.40216	-4.27097	-7.99979	1.34903	-1.17658	-0.364131	-2.10371	-5.55764	-0.57385	4.98379	0.000945243	0.00404859
820	sp|P52952|NKX25_HUMAN	sp|P52952|NKX25_HUMAN	12	sp|P52952|NKX25_HUMAN Homeobox protein Nkx-2.5 OS=Homo sapiens GN=NKX2-5 PE=1 SV=1	-1.27462	3.70142	sp|P52952|NKX25_HUMAN	4.97604	3.43381	6.51827	2.04274	7.3586	5.63673e-05	0.000549698	2.33056	2	NA	NA	1124500	22875000	91663000	201590000	167420000	129980000	NA	NA	-2.26857	-0.280675	3.28756	3.76054	3.71716	4.0404	-1.27462	3.70142	4.97604	5.63673e-05	0.000549698
2025	sp|Q9BRK4|LZTS2_HUMAN	sp|Q9BRK4|LZTS2_HUMAN	22	sp|Q9BRK4|LZTS2_HUMAN Leucine zipper putative tumor suppressor 2 OS=Homo sapiens GN=LZTS2 PE=1 SV=2	-2.54088	2.43069	sp|Q9BRK4|LZTS2_HUMAN	4.97157	3.57287	6.37027	-0.0550953	7.86464	9.93616e-06	0.000192208	3.92757	0	1668100	741920	459390	4871600	29492000	90169000	95349000	39246000	-0.742082	-3.06065	-3.63653	-2.72426	1.75963	2.62557	2.9352	2.40236	-2.54088	2.43069	4.97157	9.93616e-06	0.000192208
2068	sp|Q9BWW4|SSBP3_HUMAN	sp|Q9BWW4|SSBP3_HUMAN	3	sp|Q9BWW4|SSBP3_HUMAN Single-stranded DNA-binding protein 3 OS=Homo sapiens GN=SSBP3 PE=1 SV=1	NA	-0.329521	sp|Q9BWW4|SSBP3_HUMAN	NA	NA	NA	-0.329521	NA	NA	NA	NA	4	NA	NA	NA	NA	8537500	9225800	8134900	5311100	NA	NA	NA	NA	0.0893374	-0.590346	-0.483685	-0.333392	-5.2973	-0.329521	4.96778	0	0
1524	sp|Q7L0Y3|MRRP1_HUMAN	sp|Q7L0Y3|MRRP1_HUMAN	7	sp|Q7L0Y3|MRRP1_HUMAN Mitochondrial ribonuclease P protein 1 OS=Homo sapiens GN=TRMT10C PE=1 SV=2	NA	-0.370021	sp|Q7L0Y3|MRRP1_HUMAN	NA	NA	NA	-0.370021	NA	NA	NA	NA	4	NA	NA	NA	NA	4571900	24554000	2386300	11050000	NA	NA	NA	NA	-0.752158	0.790535	-2.1872	0.668733	-5.2973	-0.370021	4.92728	0	0
1852	sp|Q96C00|ZBTB9_HUMAN	sp|Q96C00|ZBTB9_HUMAN	13	sp|Q96C00|ZBTB9_HUMAN Zinc finger and BTB domain-containing protein 9 OS=Homo sapiens GN=ZBTB9 PE=1 SV=1	-4.22319	0.698462	sp|Q96C00|ZBTB9_HUMAN	4.92165	3.4023	6.44099	-0.942088	7.38778	5.47205e-05	0.000542607	2.35712	2	NA	239430	NA	2578700	14545000	17647000	38594000	6694100	NA	-4.71704	NA	-3.72933	0.807197	0.324572	1.67891	-0.0168354	-4.22319	0.698462	4.92165	5.47205e-05	0.000542607
187	sp|O43823|AKAP8_HUMAN	sp|O43823|AKAP8_HUMAN	5	sp|O43823|AKAP8_HUMAN A-kinase anchor protein 8 OS=Homo sapiens GN=AKAP8 PE=1 SV=1	NA	-0.376213	sp|O43823|AKAP8_HUMAN	NA	NA	NA	-0.376213	NA	NA	NA	NA	4	NA	NA	NA	NA	9275000	11459000	10691000	2587300	NA	NA	NA	NA	0.200974	-0.284549	-0.104153	-1.31712	-5.2973	-0.376213	4.92108	0	0
423	sp|P10244|MYBB_HUMAN	sp|P10244|MYBB_HUMAN	18	sp|P10244|MYBB_HUMAN Myb-related protein B OS=Homo sapiens GN=MYBL2 PE=1 SV=1	-3.17322	1.73607	sp|P10244|MYBB_HUMAN	4.90928	3.18965	6.62892	0.75421	6.65302	0.000208392	0.00137376	1.04611	3	NA	NA	NA	3666600	37142000	53206000	39574000	17260000	NA	NA	NA	-3.17322	2.07037	1.88142	1.71374	1.27874	-3.17322	1.73607	4.90928	0.000208392	0.00137376
1921	sp|Q96KM6|Z512B_HUMAN	sp|Q96KM6|Z512B_HUMAN	24	sp|Q96KM6|Z512B_HUMAN Zinc finger protein 512B OS=Homo sapiens GN=ZNF512B PE=1 SV=1	-2.60976	2.26301	sp|Q96KM6|Z512B_HUMAN	4.87277	3.45947	6.28608	-0.173374	7.62867	1.31068e-05	0.000222533	3.66491	0	245940	486810	1236500	14047000	24321000	68852000	82301000	44568000	-3.58667	-3.67777	-2.12348	-1.05112	1.49988	2.24507	2.73079	2.57631	-2.60976	2.26301	4.87277	1.31068e-05	0.000222533
1421	sp|Q5TKA1|LIN9_HUMAN	sp|Q5TKA1|LIN9_HUMAN	16	sp|Q5TKA1|LIN9_HUMAN Protein lin-9 homolog OS=Homo sapiens GN=LIN9 PE=1 SV=1	-3.72405	1.13468	sp|Q5TKA1|LIN9_HUMAN	4.85872	3.46063	6.25682	-1.29469	7.68945	1.21973e-05	0.000211659	3.73326	0	177450	780580	158300	5358800	25732000	40861000	27334000	8160400	-4.07168	-2.98626	-5.26459	-2.57366	1.57586	1.509	1.19975	0.254089	-3.72405	1.13468	4.85872	1.21973e-05	0.000211659
1966	sp|Q96T23|RSF1_HUMAN	sp|Q96T23|RSF1_HUMAN	19	sp|Q96T23|RSF1_HUMAN Remodeling and spacing factor 1 OS=Homo sapiens GN=RSF1 PE=1 SV=2	-3.50038	1.34127	sp|Q96T23|RSF1_HUMAN	4.84165	3.87496	5.80835	-1.07955	11.0819	3.84654e-07	5.81444e-05	6.87731	0	150390	671600	711750	2962700	18997000	38673000	30610000	18995000	-4.31753	-3.20649	-2.96748	-3.51001	1.16699	1.43136	1.35698	1.40976	-3.50038	1.34127	4.84165	3.84654e-07	5.81444e-05
1680	sp|Q8NBT0|POC1A_HUMAN	sp|Q8NBT0|POC1A_HUMAN	7	sp|Q8NBT0|POC1A_HUMAN POC1 centriolar protein homolog A OS=Homo sapiens GN=POC1A PE=1 SV=2	NA	-0.466586	sp|Q8NBT0|POC1A_HUMAN	NA	NA	NA	-0.466586	NA	NA	NA	NA	4	NA	NA	NA	NA	1924100	12904000	18855000	4650800	NA	NA	NA	NA	-1.91828	-0.117013	0.683938	-0.514987	-5.2973	-0.466586	4.83071	0	0
1046	sp|Q04726|TLE3_HUMAN	sp|Q04726|TLE3_HUMAN	26	sp|Q04726|TLE3_HUMAN Transducin-like enhancer protein 3 OS=Homo sapiens GN=TLE3 PE=1 SV=2	0.0886231	4.91502	sp|Q04726|TLE3_HUMAN	4.82639	3.93254	5.72025	2.50182	11.9472	1.83723e-07	4.81762e-05	7.5047	0	2830100	8057100	5716400	22067000	275190000	517170000	470790000	202730000	0.0434193	0.432428	0.216137	-0.337492	4.7688	5.0896	5.15327	4.6484	0.0886231	4.91502	4.82639	1.83723e-07	4.81762e-05
1896	sp|Q96GM5|SMRD1_HUMAN	sp|Q96GM5|SMRD1_HUMAN	12	sp|Q96GM5|SMRD1_HUMAN SWI/SNF-related matrix-associated actin-dependent regulator of chromatin subfamily D member 1 OS=Homo sapiens GN=SMARCD1 PE=1 SV=2	-4.57548	0.245515	sp|Q96GM5|SMRD1_HUMAN	4.82099	2.80972	6.83226	-1.82062	5.37555	0.000365973	0.00206626	0.513176	1	NA	467640	78327	2711400	29584000	24533000	10370000	2391800	NA	-3.73661	-6.33977	-3.65005	1.76382	0.789328	-0.146498	-1.42459	-4.57548	0.245515	4.82099	0.000365973	0.00206626
674	sp|P41162|ETV3_HUMAN	sp|P41162|ETV3_HUMAN	3	sp|P41162|ETV3_HUMAN ETS translocation variant 3 OS=Homo sapiens GN=ETV3 PE=1 SV=2	NA	-0.490517	sp|P41162|ETV3_HUMAN	NA	NA	NA	-0.490517	NA	NA	NA	NA	4	NA	NA	NA	NA	4043100	7356200	8837200	8042500	NA	NA	NA	NA	-0.917775	-0.909811	-0.368666	0.234182	-5.2973	-0.490517	4.80678	0	0
1553	sp|Q7Z6I8|CE024_HUMAN	sp|Q7Z6I8|CE024_HUMAN	5	sp|Q7Z6I8|CE024_HUMAN UPF0461 protein C5orf24 OS=Homo sapiens GN=C5orf24 PE=1 SV=1	-3.75212	1.04727	sp|Q7Z6I8|CE024_HUMAN	4.7994	3.4697	6.12909	-0.552528	8.23178	2.40784e-05	0.00032287	3.07951	2	NA	NA	561050	1947100	11211000	35571000	23407000	19348000	NA	NA	-3.33104	-4.17321	0.456402	1.31342	0.984322	1.43494	-3.75212	1.04727	4.7994	2.40784e-05	0.00032287
2341	sp|Q9NZM4|GSCR1_HUMAN	sp|Q9NZM4|GSCR1_HUMAN	11	sp|Q9NZM4|GSCR1_HUMAN Glioma tumor suppressor candidate region gene 1 protein OS=Homo sapiens GN=GLTSCR1 PE=1 SV=2	-3.88547	0.89457	sp|Q9NZM4|GSCR1_HUMAN	4.78004	2.67317	6.88692	-0.0614382	5.28726	0.000894823	0.00391796	-0.200266	3	201140	NA	NA	NA	35487000	19393000	23005000	7570200	-3.88547	NA	NA	NA	2.00896	0.457666	0.960259	0.1514	-3.88547	0.89457	4.78004	0.000894823	0.00391796
159	sp|O43248|HXC11_HUMAN	sp|O43248|HXC11_HUMAN	6	sp|O43248|HXC11_HUMAN Homeobox protein Hox-C11 OS=Homo sapiens GN=HOXC11 PE=1 SV=1	NA	-0.53191	sp|O43248|HXC11_HUMAN	NA	NA	NA	-0.53191	NA	NA	NA	NA	4	NA	NA	NA	NA	669860	13787000	16752000	11441000	NA	NA	NA	NA	-3.33997	-0.0236414	0.519673	0.716297	-5.2973	-0.53191	4.76539	0	0
1215	sp|Q14686|NCOA6_HUMAN	sp|Q14686|NCOA6_HUMAN	21	sp|Q14686|NCOA6_HUMAN Nuclear receptor coactivator 6 OS=Homo sapiens GN=NCOA6 PE=1 SV=3	-1.20698	3.55133	sp|Q14686|NCOA6_HUMAN	4.75831	3.63124	5.88538	1.51205	9.46801	3.68674e-06	0.000120843	4.81834	1	1526600	2947700	1624000	NA	174070000	150920000	171470000	58616000	-0.873798	-1.04023	-1.70691	NA	4.15169	3.35217	3.75036	2.95109	-1.20698	3.55133	4.75831	3.68674e-06	0.000120843
612	sp|P32243|OTX2_HUMAN	sp|P32243|OTX2_HUMAN	4	sp|P32243|OTX2_HUMAN Homeobox protein OTX2 OS=Homo sapiens GN=OTX2 PE=1 SV=1	-8.40782	-3.65248	sp|P32243|OTX2_HUMAN	4.75534	2.10203	7.40866	-4.84131	4.29841	0.00417527	0.012956	-1.53096	4	NA	NA	NA	133470	210850	1063700	NA	1153400	NA	NA	NA	-8.40782	-4.89744	-3.63779	NA	-2.4222	-8.40782	-3.65248	4.75534	0.00417527	0.012956
1561	sp|Q86T24|KAISO_HUMAN	sp|Q86T24|KAISO_HUMAN	31	sp|Q86T24|KAISO_HUMAN Transcriptional regulator Kaiso OS=Homo sapiens GN=ZBTB33 PE=1 SV=2	0.639399	5.38934	sp|Q86T24|KAISO_HUMAN	4.74994	3.41015	6.08974	3.01437	7.8444	1.01726e-05	0.000194338	3.90532	0	3133800	5043400	5991200	119280000	507680000	655810000	794260000	204320000	0.194886	-0.25368	0.287885	2.3285	5.59393	5.42464	5.87972	4.65908	0.639399	5.38934	4.74994	1.01726e-05	0.000194338
577	sp|P28749|RBL1_HUMAN	sp|P28749|RBL1_HUMAN	8	sp|P28749|RBL1_HUMAN Retinoblastoma-like protein 1 OS=Homo sapiens GN=RBL1 PE=1 SV=3	-6.64929	-1.91926	sp|P28749|RBL1_HUMAN	4.73003	2.48003	6.98003	-2.86526	4.89913	0.0014153	0.0054453	-0.610358	3	NA	64003	NA	NA	4582400	4539800	1952100	830720	NA	-6.64929	NA	NA	-0.749068	-1.59069	-2.46616	-2.8711	-6.64929	-1.91926	4.73003	0.0014153	0.0054453
1385	sp|Q5H9F3|BCORL_HUMAN	sp|Q5H9F3|BCORL_HUMAN	11	sp|Q5H9F3|BCORL_HUMAN BCL-6 corepressor-like protein 1 OS=Homo sapiens GN=BCORL1 PE=1 SV=1	-5.90737	-1.18631	sp|Q5H9F3|BCORL_HUMAN	4.72106	3.33951	6.10261	-3.54684	7.56105	1.42056e-05	0.000231423	3.58829	0	37947	91748	122430	847910	11975000	2467500	4780300	2077100	-6.36372	-6.12188	-5.65724	-5.48665	0.545229	-2.45076	-1.22217	-1.61756	-5.90737	-1.18631	4.72106	1.42056e-05	0.000231423
1504	sp|Q6ZRS2|SRCAP_HUMAN	sp|Q6ZRS2|SRCAP_HUMAN	20	sp|Q6ZRS2|SRCAP_HUMAN Helicase SRCAP OS=Homo sapiens GN=SRCAP PE=1 SV=3	-3.6467	1.06296	sp|Q6ZRS2|SRCAP_HUMAN	4.70966	3.27416	6.14516	-1.29187	7.25931	2.0476e-05	0.000292429	3.2389	0	79472	573500	503070	6034600	36806000	16834000	22684000	14026000	-5.2653	-3.43775	-3.49773	-2.38601	2.05813	0.258037	0.940741	0.994939	-3.6467	1.06296	4.70966	2.0476e-05	0.000292429
2133	sp|Q9H2F5|EPC1_HUMAN	sp|Q9H2F5|EPC1_HUMAN	10	sp|Q9H2F5|EPC1_HUMAN Enhancer of polycomb homolog 1 OS=Homo sapiens GN=EPC1 PE=1 SV=1	-5.26637	-0.569374	sp|Q9H2F5|EPC1_HUMAN	4.697	3.31242	6.08158	-2.13504	7.73682	3.86412e-05	0.000451452	2.6664	2	61361	213760	NA	NA	8737400	5749300	8080000	4221600	-5.64961	-4.88314	NA	NA	0.120522	-1.2575	-0.493091	-0.647428	-5.26637	-0.569374	4.697	3.86412e-05	0.000451452
1060	sp|Q06587|RING1_HUMAN	sp|Q06587|RING1_HUMAN	9	sp|Q06587|RING1_HUMAN E3 ubiquitin-protein ligase RING1 OS=Homo sapiens GN=RING1 PE=1 SV=2	-2.38021	2.29841	sp|Q06587|RING1_HUMAN	4.67862	3.59394	5.76329	0.293286	9.67331	3.05769e-06	0.000114027	4.98138	1	NA	917030	885490	8988000	42161000	94894000	46479000	36891000	NA	-2.75031	-2.63372	-1.75659	2.24115	2.69762	1.93714	2.31772	-2.38021	2.29841	4.67862	3.05769e-06	0.000114027
248	sp|O75478|TAD2A_HUMAN	sp|O75478|TAD2A_HUMAN	6	sp|O75478|TAD2A_HUMAN Transcriptional adapter 2-alpha OS=Homo sapiens GN=TADA2A PE=1 SV=3	-8.09815	-3.42652	sp|O75478|TAD2A_HUMAN	4.67163	0.0860124	9.25725	-4.36085	2.37415	0.0467819	0.0902003	-3.87072	3	NA	NA	NA	162370	9399400	409920	1036300	113290	NA	NA	NA	-8.09815	0.218926	-4.98294	-3.34575	-5.59631	-8.09815	-3.42652	4.67163	0.0467819	0.0902003
2408	sp|Q9UIS9|MBD1_HUMAN	sp|Q9UIS9|MBD1_HUMAN	4	sp|Q9UIS9|MBD1_HUMAN Methyl-CpG-binding domain protein 1 OS=Homo sapiens GN=MBD1 PE=1 SV=2	-6.64709	-2.00819	sp|Q9UIS9|MBD1_HUMAN	4.6389	2.72106	6.55674	-2.93597	5.63691	0.000602607	0.0029221	0.147097	3	NA	NA	NA	406790	1139400	4850800	1968600	2336100	NA	NA	NA	-6.64709	-2.62425	-1.49722	-2.45447	-1.45682	-6.64709	-2.00819	4.6389	0.000602607	0.0029221
567	sp|P27708|PYR1_HUMAN	sp|P27708|PYR1_HUMAN	17	sp|P27708|PYR1_HUMAN CAD protein OS=Homo sapiens GN=CAD PE=1 SV=3	-4.71448	-0.082221	sp|P27708|PYR1_HUMAN	4.63225	3.47833	5.78618	-2.39835	8.88225	3.217e-06	0.000115032	4.98083	0	228930	147120	166340	1538300	13407000	9722300	11498000	4678600	-3.69317	-5.4303	-5.18888	-4.54554	0.697425	-0.5164	-0.00307371	-0.506835	-4.71448	-0.082221	4.63225	3.217e-06	0.000115032
1508	sp|Q6ZU65|UBN2_HUMAN	sp|Q6ZU65|UBN2_HUMAN	23	sp|Q6ZU65|UBN2_HUMAN Ubinuclein-2 OS=Homo sapiens GN=UBN2 PE=1 SV=2	-1.39672	3.23026	sp|Q6ZU65|UBN2_HUMAN	4.62699	3.01836	6.23562	0.916772	6.3643	6.4622e-05	0.000600425	2.12701	0	269100	3394600	1663400	34528000	135250000	128270000	100490000	59800000	-3.45295	-0.833493	-1.67028	0.369832	3.8117	3.12277	3.00814	2.97844	-1.39672	3.23026	4.62699	6.4622e-05	0.000600425
1364	sp|Q4VC05|BCL7A_HUMAN;sp|Q9BQE9|BCL7B_HUMAN;sp|Q8WUZ0|BCL7C_HUMAN	sp|Q4VC05|BCL7A_HUMAN	2	sp|Q4VC05|BCL7A_HUMAN B-cell CLL/lymphoma 7 protein family member A OS=Homo sapiens GN=BCL7A PE=1 SV=1;sp|Q9BQE9|BCL7B_HUMAN B-cell CLL/lymphoma 7 protein family member B OS=Homo sapiens GN=BCL7B PE=1 SV=1;sp|Q8WUZ0|BCL7C_HUMAN B-cell CLL/lymphoma 7 protei	NA	-0.680405	sp|Q4VC05|BCL7A_HUMAN	NA	NA	NA	-0.680405	NA	NA	NA	NA	4	NA	NA	NA	NA	7720800	9115000	6962500	2492400	NA	NA	NA	NA	-0.0461427	-0.607391	-0.69985	-1.36824	-5.2973	-0.680405	4.61689	0	0
1387	sp|Q5HY92|FIGN_HUMAN	sp|Q5HY92|FIGN_HUMAN	6	sp|Q5HY92|FIGN_HUMAN Fidgetin OS=Homo sapiens GN=FIGN PE=1 SV=2	NA	-0.68976	sp|Q5HY92|FIGN_HUMAN	NA	NA	NA	-0.68976	NA	NA	NA	NA	4	NA	NA	NA	NA	2605300	11939000	8653000	4292800	NA	NA	NA	NA	-1.5099	-0.226662	-0.397924	-0.624551	-5.2973	-0.68976	4.60754	0	0
107	sp|O14646|CHD1_HUMAN	sp|O14646|CHD1_HUMAN	20	sp|O14646|CHD1_HUMAN Chromodomain-helicase-DNA-binding protein 1 OS=Homo sapiens GN=CHD1 PE=1 SV=2	-2.8685	1.7268	sp|O14646|CHD1_HUMAN	4.5953	3.28675	5.90384	-0.570852	7.77024	1.10922e-05	0.000201889	3.82336	0	162060	797290	1990000	4315000	26351000	61842000	27836000	28834000	-4.20648	-2.95524	-1.39633	-2.91595	1.60789	2.0936	1.22503	1.98067	-2.8685	1.7268	4.5953	1.10922e-05	0.000201889
815	sp|P52756|RBM5_HUMAN	sp|P52756|RBM5_HUMAN	20	sp|P52756|RBM5_HUMAN RNA-binding protein 5 OS=Homo sapiens GN=RBM5 PE=1 SV=2	-1.97187	2.58238	sp|P52756|RBM5_HUMAN	4.55426	3.09606	6.01246	0.63056	7.00417	4.68612e-05	0.000505289	2.49626	1	NA	2829000	483060	12343000	49413000	71845000	88648000	50067000	NA	-1.10043	-3.55975	-1.25543	2.455	2.3051	2.83398	2.73545	-1.97187	2.58238	4.55426	4.68612e-05	0.000505289
789	sp|P51532|SMCA4_HUMAN	sp|P51532|SMCA4_HUMAN	37	sp|P51532|SMCA4_HUMAN Transcription activator BRG1 OS=Homo sapiens GN=SMARCA4 PE=1 SV=2	-0.299742	4.24935	sp|P51532|SMCA4_HUMAN	4.5491	3.26095	5.83724	1.97481	7.8139	1.05404e-05	0.000194338	3.87171	0	739010	7935700	6039500	28067000	282360000	278920000	227610000	111580000	-1.95182	0.410193	0.300155	0.0425043	4.80346	4.21858	4.14376	3.83161	-0.299742	4.24935	4.5491	1.05404e-05	0.000194338
1045	sp|Q04724|TLE1_HUMAN	sp|Q04724|TLE1_HUMAN	22	sp|Q04724|TLE1_HUMAN Transducin-like enhancer protein 1 OS=Homo sapiens GN=TLE1 PE=1 SV=2	-0.808678	3.73984	sp|Q04724|TLE1_HUMAN	4.54852	3.14761	5.94942	2.22367	7.40493	5.37777e-05	0.000540781	2.37267	2	928290	5979300	NA	NA	122510000	222470000	151120000	109550000	-1.61298	-0.00437786	NA	NA	3.6784	3.89958	3.57488	3.8065	-0.808678	3.73984	4.54852	5.37777e-05	0.000540781
788	sp|P51531|SMCA2_HUMAN	sp|P51531|SMCA2_HUMAN	20	sp|P51531|SMCA2_HUMAN Probable global transcription activator SNF2L2 OS=Homo sapiens GN=SMARCA2 PE=1 SV=2	NA	-0.750557	sp|P51531|SMCA2_HUMAN	NA	NA	NA	-0.750557	NA	NA	NA	NA	4	NA	NA	NA	NA	7665000	10136000	3586400	3594500	NA	NA	NA	NA	-0.0559159	-0.457615	-1.62131	-0.86739	-5.2973	-0.750557	4.54674	0	0
601	sp|P31277|HXD11_HUMAN	sp|P31277|HXD11_HUMAN	5	sp|P31277|HXD11_HUMAN Homeobox protein Hox-D11 OS=Homo sapiens GN=HOXD11 PE=3 SV=3	-3.97604	0.560748	sp|P31277|HXD11_HUMAN	4.53678	2.73755	6.33602	-0.346609	5.87622	0.000463996	0.00243882	0.37322	3	NA	NA	NA	2205900	10530000	20333000	12649000	16500000	NA	NA	NA	-3.97604	0.371965	0.524438	0.129445	1.21714	-3.97604	0.560748	4.53678	0.000463996	0.00243882
2029	sp|Q9BRQ0|PYGO2_HUMAN	sp|Q9BRQ0|PYGO2_HUMAN	5	sp|Q9BRQ0|PYGO2_HUMAN Pygopus homolog 2 OS=Homo sapiens GN=PYGO2 PE=1 SV=2	NA	-0.780778	sp|Q9BRQ0|PYGO2_HUMAN	NA	NA	NA	-0.780778	NA	NA	NA	NA	4	NA	NA	NA	NA	5310800	2915800	13237000	4532900	NA	NA	NA	NA	-0.550302	-2.21526	0.192559	-0.550109	-5.2973	-0.780778	4.51652	0	0
1745	sp|Q8TF68|ZN384_HUMAN	sp|Q8TF68|ZN384_HUMAN	9	sp|Q8TF68|ZN384_HUMAN Zinc finger protein 384 OS=Homo sapiens GN=ZNF384 PE=1 SV=2	-3.6681	0.838981	sp|Q8TF68|ZN384_HUMAN	4.50708	2.76613	6.24802	-0.0624345	6.03321	0.000392411	0.00216883	0.516598	3	NA	NA	NA	2680600	16189000	22299000	15838000	17634000	NA	NA	NA	-3.6681	0.951481	0.65464	0.441742	1.30806	-3.6681	0.838981	4.50708	0.000392411	0.00216883
1457	sp|Q6ICG6|K0930_HUMAN	sp|Q6ICG6|K0930_HUMAN	4	sp|Q6ICG6|K0930_HUMAN Uncharacterized protein KIAA0930 OS=Homo sapiens GN=KIAA0930 PE=1 SV=1	NA	-0.796134	sp|Q6ICG6|K0930_HUMAN	NA	NA	NA	-0.796134	NA	NA	NA	NA	4	NA	NA	NA	NA	1640300	17297000	5480000	5382500	NA	NA	NA	NA	-2.1333	0.296313	-1.03243	-0.315126	-5.2973	-0.796134	4.50116	0	0
575	sp|P28347|TEAD1_HUMAN;sp|Q99594|TEAD3_HUMAN;sp|Q15562|TEAD2_HUMAN	sp|P28347|TEAD1_HUMAN	7	sp|P28347|TEAD1_HUMAN Transcriptional enhancer factor TEF-1 OS=Homo sapiens GN=TEAD1 PE=1 SV=2;sp|Q99594|TEAD3_HUMAN Transcriptional enhancer factor TEF-5 OS=Homo sapiens GN=TEAD3 PE=1 SV=2;sp|Q15562|TEAD2_HUMAN Transcriptional enhancer factor TEF-4 OS=Hom	-4.23308	0.263329	sp|P28347|TEAD1_HUMAN	4.49641	2.50898	6.48383	-0.635952	5.27246	0.000910259	0.00395619	-0.215429	3	NA	333190	NA	NA	5383600	18219000	12176000	15586000	NA	-4.23308	NA	NA	-0.531957	0.369572	0.0765079	1.13919	-4.23308	0.263329	4.49641	0.000910259	0.00395619
2127	sp|Q9H161|ALX4_HUMAN	sp|Q9H161|ALX4_HUMAN	9	sp|Q9H161|ALX4_HUMAN Homeobox protein aristaless-like 4 OS=Homo sapiens GN=ALX4 PE=1 SV=2	NA	-0.808058	sp|Q9H161|ALX4_HUMAN	NA	NA	NA	-0.808058	NA	NA	NA	NA	4	NA	NA	NA	NA	675020	14317000	5328500	15586000	NA	NA	NA	NA	-3.32963	0.0295719	-1.07137	1.13919	-5.2973	-0.808058	4.48924	0	0
1302	sp|Q15746|MYLK_HUMAN	sp|Q15746|MYLK_HUMAN	2	sp|Q15746|MYLK_HUMAN Myosin light chain kinase, smooth muscle OS=Homo sapiens GN=MYLK PE=1 SV=4	NA	-0.812801	sp|Q15746|MYLK_HUMAN	NA	NA	NA	-0.812801	NA	NA	NA	NA	4	NA	NA	NA	NA	4902200	6551200	6982900	3710500	NA	NA	NA	NA	-0.658171	-1.0733	-0.695786	-0.823945	-5.2973	-0.812801	4.4845	0	0
773	sp|P50548|ERF_HUMAN	sp|P50548|ERF_HUMAN	4	sp|P50548|ERF_HUMAN ETS domain-containing transcription factor ERF OS=Homo sapiens GN=ERF PE=1 SV=2	NA	-0.818666	sp|P50548|ERF_HUMAN	NA	NA	NA	-0.818666	NA	NA	NA	NA	4	NA	NA	NA	NA	4353300	7397500	6483600	3900200	NA	NA	NA	NA	-0.818173	-0.901913	-0.798834	-0.755743	-5.2973	-0.818666	4.47863	0	0
2142	sp|Q9H2Y7|ZN106_HUMAN	sp|Q9H2Y7|ZN106_HUMAN	14	sp|Q9H2Y7|ZN106_HUMAN Zinc finger protein 106 OS=Homo sapiens GN=ZNF106 PE=1 SV=1	-4.49401	-0.0241425	sp|Q9H2Y7|ZN106_HUMAN	4.46987	2.34753	6.5922	-0.918116	4.90816	0.00139994	0.00540731	-0.600518	3	NA	NA	NA	1589300	18448000	9820400	6786900	6844300	NA	NA	NA	-4.49401	1.12748	-0.502237	-0.735331	0.0135166	-4.49401	-0.0241425	4.46987	0.00139994	0.00540731
18	REV__sp|O14686|KMT2D_HUMAN	REV__sp|O14686|KMT2D_HUMAN	2	sp|O14686|KMT2D_HUMAN Histone-lysine N-methyltransferase 2D OS=Homo sapiens GN=KMT2D PE=1 SV=2	NA	-0.830587	REV__sp|O14686|KMT2D_HUMAN	NA	NA	NA	-0.830587	NA	NA	NA	NA	4	NA	NA	NA	NA	5210900	4355100	6040800	5854800	NA	NA	NA	NA	-0.575888	-1.64929	-0.897092	-0.200078	-5.2973	-0.830587	4.46671	0	0
1407	sp|Q5T3J3|LRIF1_HUMAN	sp|Q5T3J3|LRIF1_HUMAN	17	sp|Q5T3J3|LRIF1_HUMAN Ligand-dependent nuclear receptor-interacting factor 1 OS=Homo sapiens GN=LRIF1 PE=1 SV=1	-3.0783	1.36271	sp|Q5T3J3|LRIF1_HUMAN	4.44101	3.06784	5.81417	-0.857797	7.15594	2.32652e-05	0.000315551	3.11633	0	601700	509420	283600	7365800	10017000	42402000	41922000	25103000	-2.25726	-3.61128	-4.37359	-2.07107	0.30467	1.56122	1.7938	1.79113	-3.0783	1.36271	4.44101	2.32652e-05	0.000315551
375	sp|P05412|JUN_HUMAN	sp|P05412|JUN_HUMAN	9	sp|P05412|JUN_HUMAN Transcription factor AP-1 OS=Homo sapiens GN=JUN PE=1 SV=2	-1.61284	2.82746	sp|P05412|JUN_HUMAN	4.4403	3.06973	5.81087	0.607307	7.16836	2.29094e-05	0.000312522	3.13113	0	354600	3621300	1111500	21437000	46018000	135560000	86746000	58404000	-3.04297	-0.738813	-2.28634	-0.383255	2.3591	3.20075	2.80386	2.94613	-1.61284	2.82746	4.4403	2.29094e-05	0.000312522
289	sp|O94880|PHF14_HUMAN	sp|O94880|PHF14_HUMAN	10	sp|O94880|PHF14_HUMAN PHD finger protein 14 OS=Homo sapiens GN=PHF14 PE=1 SV=2	-4.83485	-0.39575	sp|O94880|PHF14_HUMAN	4.4391	3.0589	5.81929	-1.87545	7.33525	5.77241e-05	0.000557314	2.30923	2	NA	265490	NA	1080300	4654400	14648000	5321400	7598300	NA	-4.56573	NA	-5.10396	-0.728062	0.0618148	-1.07322	0.156468	-4.83485	-0.39575	4.4391	5.77241e-05	0.000557314
2364	sp|Q9P2K3|RCOR3_HUMAN	sp|Q9P2K3|RCOR3_HUMAN	9	sp|Q9P2K3|RCOR3_HUMAN REST corepressor 3 OS=Homo sapiens GN=RCOR3 PE=1 SV=2	-5.52424	-1.08517	sp|Q9P2K3|RCOR3_HUMAN	4.43908	1.71407	7.16408	-1.97298	3.79632	0.00586756	0.0168871	-1.92064	3	NA	137980	NA	NA	8454500	13328000	1643600	2042800	NA	-5.52424	NA	NA	0.0761742	-0.0714059	-2.7051	-1.64034	-5.52424	-1.08517	4.43908	0.00586756	0.0168871
1077	sp|Q09472|EP300_HUMAN	sp|Q09472|EP300_HUMAN	58	sp|Q09472|EP300_HUMAN Histone acetyltransferase p300 OS=Homo sapiens GN=EP300 PE=1 SV=2	0.0934556	4.52788	sp|Q09472|EP300_HUMAN	4.43443	3.26898	5.59987	2.62741	8.53302	9.03524e-06	0.000182249	4.02087	1	3329200	6744600	4421400	NA	457370000	336840000	259000000	113110000	0.284764	0.172012	-0.176409	NA	5.45332	4.48475	4.32322	3.85024	0.0934556	4.52788	4.43443	9.03524e-06	0.000182249
597	sp|P31260|HXA10_HUMAN	sp|P31260|HXA10_HUMAN	4	sp|P31260|HXA10_HUMAN Homeobox protein Hox-A10 OS=Homo sapiens GN=HOXA10 PE=1 SV=3	-6.77723	-2.35621	sp|P31260|HXA10_HUMAN	4.42102	1.99732	6.84472	-3.46146	4.3748	0.00382038	0.0120536	-1.44977	4	NA	NA	58828	NA	NA	1954500	1242900	2827200	NA	NA	-6.77723	NA	NA	-2.77955	-3.09324	-1.19583	-6.77723	-2.35621	4.42102	0.00382038	0.0120536
1844	sp|Q96BD5|PF21A_HUMAN	sp|Q96BD5|PF21A_HUMAN	8	sp|Q96BD5|PF21A_HUMAN PHD finger protein 21A OS=Homo sapiens GN=PHF21A PE=1 SV=1	-3.06348	1.35107	sp|Q96BD5|PF21A_HUMAN	4.41455	2.73303	6.09607	-0.120451	5.98747	0.000252906	0.00156656	0.949596	2	NA	NA	301450	8490000	24532000	35421000	22616000	22621000	NA	NA	-4.28032	-1.84665	1.51152	1.30745	0.936571	1.64872	-3.06348	1.35107	4.41455	0.000252906	0.00156656
1652	sp|Q8N4T0|CBPA6_HUMAN	sp|Q8N4T0|CBPA6_HUMAN	2	sp|Q8N4T0|CBPA6_HUMAN Carboxypeptidase A6 OS=Homo sapiens GN=CPA6 PE=1 SV=2	NA	-0.888673	sp|Q8N4T0|CBPA6_HUMAN	NA	NA	NA	-0.888673	NA	NA	NA	NA	4	NA	NA	NA	NA	2851900	15061000	3522000	4303300	NA	NA	NA	NA	-1.38805	0.101039	-1.64647	-0.621209	-5.2973	-0.888673	4.40862	0	0
1717	sp|Q8TAQ2|SMRC2_HUMAN	sp|Q8TAQ2|SMRC2_HUMAN	17	sp|Q8TAQ2|SMRC2_HUMAN SWI/SNF complex subunit SMARCC2 OS=Homo sapiens GN=SMARCC2 PE=1 SV=1	-4.0146	0.388748	sp|Q8TAQ2|SMRC2_HUMAN	4.40334	2.80548	6.00121	-1.81292	6.09748	9.28628e-05	0.000788332	1.77263	0	197580	376950	331920	2227200	45928000	26497000	9930000	2275600	-3.91201	-4.05235	-4.13317	-3.96085	2.35646	0.897969	-0.20672	-1.49271	-4.0146	0.388748	4.40334	9.28628e-05	0.000788332
1305	sp|Q15788|NCOA1_HUMAN	sp|Q15788|NCOA1_HUMAN	9	sp|Q15788|NCOA1_HUMAN Nuclear receptor coactivator 1 OS=Homo sapiens GN=NCOA1 PE=1 SV=3	NA	-0.894939	sp|Q15788|NCOA1_HUMAN	NA	NA	NA	-0.894939	NA	NA	NA	NA	4	NA	NA	NA	NA	16024000	10507000	1245300	3215100	NA	NA	NA	NA	0.937678	-0.406903	-3.09056	-1.01997	-5.2973	-0.894939	4.40236	0	0
792	sp|P51608|MECP2_HUMAN	sp|P51608|MECP2_HUMAN	12	sp|P51608|MECP2_HUMAN Methyl-CpG-binding protein 2 OS=Homo sapiens GN=MECP2 PE=1 SV=1	-2.46728	1.9174	sp|P51608|MECP2_HUMAN	4.38468	3.22973	5.53962	-0.274938	8.4001	5.41833e-06	0.000136035	4.49735	0	350880	1399500	2000900	3402600	21158000	64832000	50421000	32563000	-3.05864	-2.1312	-1.38799	-3.29128	1.31216	2.16021	2.05021	2.14702	-2.46728	1.9174	4.38468	5.41833e-06	0.000136035
2175	sp|Q9H7S9|ZN703_HUMAN	sp|Q9H7S9|ZN703_HUMAN	8	sp|Q9H7S9|ZN703_HUMAN Zinc finger protein 703 OS=Homo sapiens GN=ZNF703 PE=1 SV=1	-2.72337	1.65698	sp|Q9H7S9|ZN703_HUMAN	4.38035	3.35636	5.40434	-0.533199	9.46504	1.76328e-06	8.58817e-05	5.53035	0	838720	749880	541910	4945000	28895000	51257000	38764000	18614000	-1.76375	-3.04502	-3.38408	-2.70063	1.73207	1.82877	1.68502	1.38204	-2.72337	1.65698	4.38035	1.76328e-06	8.58817e-05
1505	sp|Q6ZRV2|FA83H_HUMAN	sp|Q6ZRV2|FA83H_HUMAN	15	sp|Q6ZRV2|FA83H_HUMAN Protein FAM83H OS=Homo sapiens GN=FAM83H PE=1 SV=3	-4.7135	-0.343507	sp|Q6ZRV2|FA83H_HUMAN	4.36999	2.17231	6.56768	-1.21751	4.63397	0.0019599	0.00704014	-0.905762	3	NA	240010	NA	NA	5426900	7383300	23263000	3448800	NA	-4.7135	NA	NA	-0.521164	-0.904624	0.97575	-0.923989	-4.7135	-0.343507	4.36999	0.0019599	0.00704014
821	sp|P53350|PLK1_HUMAN	sp|P53350|PLK1_HUMAN	29	sp|P53350|PLK1_HUMAN Serine/threonine-protein kinase PLK1 OS=Homo sapiens GN=PLK1 PE=1 SV=1	-0.141646	4.21695	sp|P53350|PLK1_HUMAN	4.3586	3.26647	5.45073	2.03765	8.83041	3.39885e-06	0.000117227	4.93013	0	4430300	5046500	2843700	24499000	114060000	227140000	371140000	186450000	0.709346	-0.25278	-0.850841	-0.172309	3.58211	3.92888	4.82292	4.53389	-0.141646	4.21695	4.3586	3.39885e-06	0.000117227
1560	sp|Q86SE9|PCGF5_HUMAN	sp|Q86SE9|PCGF5_HUMAN	6	sp|Q86SE9|PCGF5_HUMAN Polycomb group RING finger protein 5 OS=Homo sapiens GN=PCGF5 PE=1 SV=1	NA	-0.943125	sp|Q86SE9|PCGF5_HUMAN	NA	NA	NA	-0.943125	NA	NA	NA	NA	4	NA	NA	NA	NA	2167300	16468000	3922300	3931900	NA	NA	NA	NA	-1.75791	0.227028	-1.49695	-0.74467	-5.2973	-0.943125	4.35417	0	0
1813	sp|Q92908|GATA6_HUMAN	sp|Q92908|GATA6_HUMAN	9	sp|Q92908|GATA6_HUMAN Transcription factor GATA-6 OS=Homo sapiens GN=GATA6 PE=1 SV=2	NA	-0.959664	sp|Q92908|GATA6_HUMAN	NA	NA	NA	-0.959664	NA	NA	NA	NA	4	NA	NA	NA	NA	2025700	6717400	13780000	2818300	NA	NA	NA	NA	-1.84895	-1.03796	0.2484	-1.20015	-5.2973	-0.959664	4.33763	0	0
2268	sp|Q9NS73|MBIP1_HUMAN	sp|Q9NS73|MBIP1_HUMAN	7	sp|Q9NS73|MBIP1_HUMAN MAP3K12-binding inhibitory protein 1 OS=Homo sapiens GN=MBIP PE=1 SV=2	-4.78343	-0.448839	sp|Q9NS73|MBIP1_HUMAN	4.33459	0.77549	7.89368	-1.53249	2.92095	0.0240694	0.0532368	-3.17069	4	NA	228820	NA	NA	30886000	5470300	3062400	NA	NA	-4.78343	NA	NA	1.82185	-1.32767	-1.8407	NA	-4.78343	-0.448839	4.33459	0.0240694	0.0532368
1998	sp|Q99714|HCD2_HUMAN	sp|Q99714|HCD2_HUMAN	9	sp|Q99714|HCD2_HUMAN 3-hydroxyacyl-CoA dehydrogenase type-2 OS=Homo sapiens GN=HSD17B10 PE=1 SV=3	-2.85673	1.47631	sp|Q99714|HCD2_HUMAN	4.33304	2.71072	5.95536	-0.380707	5.9898	0.000161814	0.00116937	1.30864	1	NA	1049000	1814500	1604100	20580000	75849000	23230000	17213000	NA	-2.5534	-1.53742	-4.47937	1.27484	2.38161	0.973778	1.27501	-2.85673	1.47631	4.33304	0.000161814	0.00116937
99	sp|O14529|CUX2_HUMAN	sp|O14529|CUX2_HUMAN	3	sp|O14529|CUX2_HUMAN Homeobox protein cut-like 2 OS=Homo sapiens GN=CUX2 PE=1 SV=4	NA	-0.977417	sp|O14529|CUX2_HUMAN	NA	NA	NA	-0.977417	NA	NA	NA	NA	4	NA	NA	NA	NA	12802000	11161000	2511700	1452200	NA	NA	NA	NA	0.635208	-0.321721	-2.11606	-2.1071	-5.2973	-0.977417	4.31988	0	0
600	sp|P31276|HXC13_HUMAN	sp|P31276|HXC13_HUMAN	6	sp|P31276|HXC13_HUMAN Homeobox protein Hox-C13 OS=Homo sapiens GN=HOXC13 PE=1 SV=3	NA	-0.989819	sp|P31276|HXC13_HUMAN	NA	NA	NA	-0.989819	NA	NA	NA	NA	4	NA	NA	NA	NA	2048100	14117000	1604900	10534000	NA	NA	NA	NA	-1.83413	0.0097265	-2.73819	0.60332	-5.2973	-0.989819	4.30748	0	0
839	sp|P54727|RD23B_HUMAN	sp|P54727|RD23B_HUMAN	3	sp|P54727|RD23B_HUMAN UV excision repair protein RAD23 homolog B OS=Homo sapiens GN=RAD23B PE=1 SV=1	-6.27332	-1.97021	sp|P54727|RD23B_HUMAN	4.30311	3.09791	5.50831	-4.12177	7.90008	9.5363e-06	0.000185997	3.9664	0	63567	71037	108760	293760	851330	5343600	4244000	1443100	-5.59712	-6.49658	-5.83816	-7.16142	-3.01696	-1.36073	-1.38746	-2.1157	-6.27332	-1.97021	4.30311	9.5363e-06	0.000185997
1022	sp|Q01167|FOXK2_HUMAN	sp|Q01167|FOXK2_HUMAN	19	sp|Q01167|FOXK2_HUMAN Forkhead box protein K2 OS=Homo sapiens GN=FOXK2 PE=1 SV=3	-1.67428	2.62707	sp|Q01167|FOXK2_HUMAN	4.30135	3.31265	5.29005	0.476398	9.62606	1.50125e-06	8.23941e-05	5.67581	0	855360	2416200	1770100	7437100	30283000	94489000	100850000	61120000	-1.73456	-1.33143	-1.57527	-2.05585	1.79529	2.69159	3.01311	3.0083	-1.67428	2.62707	4.30135	1.50125e-06	8.23941e-05
2261	sp|Q9NRL2|BAZ1A_HUMAN	sp|Q9NRL2|BAZ1A_HUMAN	39	sp|Q9NRL2|BAZ1A_HUMAN Bromodomain adjacent to zinc finger domain protein 1A OS=Homo sapiens GN=BAZ1A PE=1 SV=2	-1.54164	2.759	sp|Q9NRL2|BAZ1A_HUMAN	4.30064	2.39932	6.20196	0.608679	5.00479	0.000454182	0.00240329	0.206953	0	128490	3658100	3201800	23747000	45286000	138180000	82222000	50281000	-4.55139	-0.724005	-0.669596	-0.221566	2.33749	3.22776	2.72946	2.74129	-1.54164	2.759	4.30064	0.000454182	0.00240329
455	sp|P13804|ETFA_HUMAN	sp|P13804|ETFA_HUMAN	7	sp|P13804|ETFA_HUMAN Electron transfer flavoprotein subunit alpha, mitochondrial OS=Homo sapiens GN=ETFA PE=1 SV=1	-7.05792	-2.76526	sp|P13804|ETFA_HUMAN	4.29267	1.63591	6.94942	-4.60497	3.62353	0.00502986	0.0149502	-2.07437	1	41281	NA	128100	73653	2252800	9951400	521500	239540	-6.23859	NA	-5.58806	-9.34712	-1.70578	-0.483544	-4.29959	-4.57211	-7.05792	-2.76526	4.29267	0.00502986	0.0149502
115	sp|O14757|CHK1_HUMAN	sp|O14757|CHK1_HUMAN	17	sp|O14757|CHK1_HUMAN Serine/threonine-protein kinase Chk1 OS=Homo sapiens GN=CHEK1 PE=1 SV=2	-3.45407	0.836328	sp|O14757|CHK1_HUMAN	4.29039	2.38791	6.19288	-0.593803	5.14324	0.000716914	0.00329167	-0.042754	2	NA	1118500	270000	NA	27484000	42824000	17433000	4808000	NA	-2.45945	-4.44869	NA	1.66462	1.57519	0.575021	-0.469517	-3.45407	0.836328	4.29039	0.000716914	0.00329167
195	sp|O60315|ZEB2_HUMAN	sp|O60315|ZEB2_HUMAN	6	sp|O60315|ZEB2_HUMAN Zinc finger E-box-binding homeobox 2 OS=Homo sapiens GN=ZEB2 PE=1 SV=1	NA	-1.01037	sp|O60315|ZEB2_HUMAN	NA	NA	NA	-1.01037	NA	NA	NA	NA	4	NA	NA	NA	NA	9641900	6253500	3409000	2323800	NA	NA	NA	NA	0.253247	-1.13891	-1.69177	-1.46404	-5.2973	-1.01037	4.28693	0	0
1625	sp|Q8IXB1|DJC10_HUMAN	sp|Q8IXB1|DJC10_HUMAN	10	sp|Q8IXB1|DJC10_HUMAN DnaJ homolog subfamily C member 10 OS=Homo sapiens GN=DNAJC10 PE=1 SV=2	NA	-1.0164	sp|Q8IXB1|DJC10_HUMAN	NA	NA	NA	-1.0164	NA	NA	NA	NA	4	NA	NA	NA	NA	4255700	9434600	4132500	2750100	NA	NA	NA	NA	-0.848725	-0.558775	-1.42444	-1.23365	-5.2973	-1.0164	4.2809	0	0
2053	sp|Q9BVA1|TBB2B_HUMAN;sp|Q13885|TBB2A_HUMAN	sp|Q9BVA1|TBB2B_HUMAN	22	sp|Q9BVA1|TBB2B_HUMAN Tubulin beta-2B chain OS=Homo sapiens GN=TUBB2B PE=1 SV=1;sp|Q13885|TBB2A_HUMAN Tubulin beta-2A chain OS=Homo sapiens GN=TUBB2A PE=1 SV=1	-4.1219	0.143682	sp|Q9BVA1|TBB2B_HUMAN	4.26559	2.95	5.58117	-1.27818	7.39468	5.4339e-05	0.000541097	2.36338	2	152800	NA	NA	2242700	5550000	20096000	17845000	6535200	-4.29391	NA	NA	-3.9499	-0.490942	0.507898	0.607467	-0.0496959	-4.1219	0.143682	4.26559	5.4339e-05	0.000541097
1591	sp|Q86XN7|PRSR1_HUMAN	sp|Q86XN7|PRSR1_HUMAN	2	sp|Q86XN7|PRSR1_HUMAN Proline and serine-rich protein 1 OS=Homo sapiens GN=PROSER1 PE=1 SV=2	NA	-1.07785	sp|Q86XN7|PRSR1_HUMAN	NA	NA	NA	-1.07785	NA	NA	NA	NA	4	NA	NA	NA	NA	2914400	4302500	5879100	5241900	NA	NA	NA	NA	-1.35884	-1.66643	-0.93478	-0.351331	-5.2973	-1.07785	4.21945	0	0
1992	sp|Q99626|CDX2_HUMAN	sp|Q99626|CDX2_HUMAN	6	sp|Q99626|CDX2_HUMAN Homeobox protein CDX-2 OS=Homo sapiens GN=CDX2 PE=2 SV=3	NA	-1.08301	sp|Q99626|CDX2_HUMAN	NA	NA	NA	-1.08301	NA	NA	NA	NA	4	NA	NA	NA	NA	1962100	18494000	7764100	1277600	NA	NA	NA	NA	-1.89193	0.390706	-0.548486	-2.28232	-5.2973	-1.08301	4.21429	0	0
255	sp|O75531|BAF_HUMAN	sp|O75531|BAF_HUMAN	8	sp|O75531|BAF_HUMAN Barrier-to-autointegration factor OS=Homo sapiens GN=BANF1 PE=1 SV=1	-1.22275	2.98873	sp|O75531|BAF_HUMAN	4.21149	3.01974	5.40324	0.88299	7.81914	1.04762e-05	0.000194338	3.87748	0	1034800	1796200	5431600	8679500	71584000	185720000	76934000	49451000	-1.45158	-1.76571	0.138042	-1.81177	2.95442	3.64487	2.63712	2.71852	-1.22275	2.98873	4.21149	1.04762e-05	0.000194338
598	sp|P31273|HXC8_HUMAN;sp|P17481|HXB8_HUMAN	sp|P31273|HXC8_HUMAN	6	sp|P31273|HXC8_HUMAN Homeobox protein Hox-C8 OS=Homo sapiens GN=HOXC8 PE=1 SV=2;sp|P17481|HXB8_HUMAN Homeobox protein Hox-B8 OS=Homo sapiens GN=HOXB8 PE=2 SV=2	-8.75781	-4.55111	sp|P31273|HXC8_HUMAN	4.20669	1.89913	6.51425	-5.39245	4.24841	0.00320487	0.010545	-1.35762	3	NA	NA	NA	106950	101490	493040	673140	468590	NA	NA	NA	-8.75781	-5.88263	-4.72249	-3.94505	-3.65428	-8.75781	-4.55111	4.20669	0.00320487	0.010545
348	sp|O96019|ACL6A_HUMAN	sp|O96019|ACL6A_HUMAN	15	sp|O96019|ACL6A_HUMAN Actin-like protein 6A OS=Homo sapiens GN=ACTL6A PE=1 SV=1	-0.5605	3.6429	sp|O96019|ACL6A_HUMAN	4.2034	2.87572	5.53108	1.5412	7.00514	2.80938e-05	0.000352667	2.93484	0	959600	2926300	3164700	53442000	191980000	207140000	124770000	69313000	-1.56369	-1.0509	-0.687406	1.06	4.28365	3.79886	3.30874	3.18037	-0.5605	3.6429	4.2034	2.80938e-05	0.000352667
2207	sp|Q9HCC0|MCCB_HUMAN	sp|Q9HCC0|MCCB_HUMAN	32	sp|Q9HCC0|MCCB_HUMAN Methylcrotonoyl-CoA carboxylase beta chain, mitochondrial OS=Homo sapiens GN=MCCC2 PE=1 SV=1	2.22988	6.42878	sp|Q9HCC0|MCCB_HUMAN	4.1989	2.46145	5.93634	4.32933	5.34728	0.000271188	0.00163684	0.717586	0	9649900	16342000	33944000	145920000	4484800000	1738700000	819410000	176990000	1.86611	1.46814	2.93827	2.647	8.52934	6.80009	5.92302	4.46267	2.22988	6.42878	4.1989	0.000271188	0.00163684
552	sp|P26367|PAX6_HUMAN	sp|P26367|PAX6_HUMAN	8	sp|P26367|PAX6_HUMAN Paired box protein Pax-6 OS=Homo sapiens GN=PAX6 PE=1 SV=2	-4.68742	-0.50316	sp|P26367|PAX6_HUMAN	4.18426	2.29604	6.07248	-2.29641	4.9696	0.000646142	0.00308683	-0.0453681	1	NA	295870	149070	1798300	1042800	12566000	26689000	5517900	NA	-4.40706	-5.35639	-4.29881	-2.74362	-0.154456	1.16658	-0.281143	-4.68742	-0.50316	4.18426	0.000646142	0.00308683
2126	sp|Q9H147|TDIF1_HUMAN	sp|Q9H147|TDIF1_HUMAN	10	sp|Q9H147|TDIF1_HUMAN Deoxynucleotidyltransferase terminal-interacting protein 1 OS=Homo sapiens GN=DNTTIP1 PE=1 SV=2	-1.88034	2.29995	sp|Q9H147|TDIF1_HUMAN	4.18029	2.53366	5.82691	1.46389	5.91629	0.000444438	0.00237857	0.410188	3	NA	NA	NA	8310900	48239000	79004000	55666000	32644000	NA	NA	NA	-1.88034	2.42261	2.4391	2.18767	2.15042	-1.88034	2.29995	4.18029	0.000444438	0.00237857
1769	sp|Q8WXX7|AUTS2_HUMAN	sp|Q8WXX7|AUTS2_HUMAN	6	sp|Q8WXX7|AUTS2_HUMAN Autism susceptibility gene 2 protein OS=Homo sapiens GN=AUTS2 PE=1 SV=1	NA	-1.11794	sp|Q8WXX7|AUTS2_HUMAN	NA	NA	NA	-1.11794	NA	NA	NA	NA	4	NA	NA	NA	NA	618160	10942000	4655500	10394000	NA	NA	NA	NA	-3.44819	-0.349676	-1.25891	0.585019	-5.2973	-1.11794	4.17936	0	0
483	sp|P17480|UBF1_HUMAN	sp|P17480|UBF1_HUMAN	26	sp|P17480|UBF1_HUMAN Nucleolar transcription factor 1 OS=Homo sapiens GN=UBTF PE=1 SV=1	-0.888908	3.28841	sp|P17480|UBF1_HUMAN	4.17732	2.98746	5.36718	1.19975	7.76802	1.1121e-05	0.000201889	3.8209	0	2051100	2358900	5277500	8481900	88421000	204820000	73401000	91471000	-0.434954	-1.36658	0.0940607	-1.84816	3.23904	3.78297	2.57183	3.5598	-0.888908	3.28841	4.17732	1.1121e-05	0.000201889
1952	sp|Q96RQ3|MCCA_HUMAN	sp|Q96RQ3|MCCA_HUMAN	34	sp|Q96RQ3|MCCA_HUMAN Methylcrotonoyl-CoA carboxylase subunit alpha, mitochondrial OS=Homo sapiens GN=MCCC1 PE=1 SV=3	2.05044	6.20852	sp|Q96RQ3|MCCA_HUMAN	4.15808	2.27249	6.04368	4.12948	4.87926	0.000550982	0.00275491	0.0153166	0	4953400	12836000	30810000	238290000	3427900000	1348500000	833990000	154610000	0.875185	1.11448	2.79024	3.42185	8.16724	6.44157	5.94752	4.27775	2.05044	6.20852	4.15808	0.000550982	0.00275491
51	sp|A6NHR9|SMHD1_HUMAN	sp|A6NHR9|SMHD1_HUMAN	26	sp|A6NHR9|SMHD1_HUMAN Structural maintenance of chromosomes flexible hinge domain-containing protein 1 OS=Homo sapiens GN=SMCHD1 PE=1 SV=2	-2.87706	1.27219	sp|A6NHR9|SMHD1_HUMAN	4.14925	2.54885	5.74965	-0.506057	5.81429	0.000203231	0.00135487	1.08741	1	117770	NA	1135700	9334100	16078000	45668000	24206000	19558000	-4.68084	NA	-2.25343	-1.6969	0.942211	1.6659	1.03094	1.44971	-2.87706	1.27219	4.14925	0.000203231	0.00135487
95	sp|O00763|ACACB_HUMAN	sp|O00763|ACACB_HUMAN	27	sp|O00763|ACACB_HUMAN Acetyl-CoA carboxylase 2 OS=Homo sapiens GN=ACACB PE=1 SV=3	NA	-1.17489	sp|O00763|ACACB_HUMAN	NA	NA	NA	-1.17489	NA	NA	NA	NA	4	NA	NA	NA	NA	23580000	11245000	5081700	216670	NA	NA	NA	NA	1.45819	-0.311143	-1.13724	-4.70937	-5.2973	-1.17489	4.12241	0	0
447	sp|P13010|XRCC5_HUMAN	sp|P13010|XRCC5_HUMAN	48	sp|P13010|XRCC5_HUMAN X-ray repair cross-complementing protein 5 OS=Homo sapiens GN=XRCC5 PE=1 SV=3	2.2596	6.36993	sp|P13010|XRCC5_HUMAN	4.11032	2.68822	5.53243	4.31477	6.39518	6.20047e-05	0.000582992	2.16732	0	5170500	19220000	61550000	136890000	563230000	2305200000	1090400000	643370000	0.938925	1.70572	3.84771	2.54607	5.73384	7.19795	6.31988	6.22804	2.2596	6.36993	4.11032	6.20047e-05	0.000582992
576	sp|P28370|SMCA1_HUMAN	sp|P28370|SMCA1_HUMAN	25	sp|P28370|SMCA1_HUMAN Probable global transcription activator SNF2L1 OS=Homo sapiens GN=SMARCA1 PE=1 SV=2	NA	-1.19871	sp|P28370|SMCA1_HUMAN	NA	NA	NA	-1.19871	NA	NA	NA	NA	4	NA	NA	NA	NA	2659500	5423100	2330900	8118500	NA	NA	NA	NA	-1.48216	-1.3399	-2.21982	0.247047	-5.2973	-1.19871	4.09859	0	0
2482	sp|Q9UPW6|SATB2_HUMAN	sp|Q9UPW6|SATB2_HUMAN	13	sp|Q9UPW6|SATB2_HUMAN DNA-binding protein SATB2 OS=Homo sapiens GN=SATB2 PE=1 SV=2	-1.94903	2.14354	sp|Q9UPW6|SATB2_HUMAN	4.09257	2.37974	5.80539	1.32503	5.56828	0.000650401	0.0031009	0.0805257	3	740400	NA	NA	NA	38717000	88983000	46989000	26958000	-1.94903	NA	NA	NA	2.12633	2.6069	1.95229	1.88864	-1.94903	2.14354	4.09257	0.000650401	0.0031009
117	sp|O14802|RPC1_HUMAN	sp|O14802|RPC1_HUMAN	2	sp|O14802|RPC1_HUMAN DNA-directed RNA polymerase III subunit RPC1 OS=Homo sapiens GN=POLR3A PE=1 SV=2	-8.5796	-4.48944	sp|O14802|RPC1_HUMAN	4.09016	1.11391	7.0664	-5.51198	3.296	0.0145324	0.0354303	-2.69359	4	NA	NA	NA	119720	95187	1752100	430630	NA	NA	NA	NA	-8.5796	-5.96902	-2.93377	-4.56553	NA	-8.5796	-4.48944	4.09016	0.0145324	0.0354303
2215	sp|Q9HCM1|K1551_HUMAN	sp|Q9HCM1|K1551_HUMAN	8	sp|Q9HCM1|K1551_HUMAN Uncharacterized protein KIAA1551 OS=Homo sapiens GN=KIAA1551 PE=1 SV=3	NA	-1.22052	sp|Q9HCM1|K1551_HUMAN	NA	NA	NA	-1.22052	NA	NA	NA	NA	4	NA	NA	NA	NA	1140300	10645000	8761000	2280600	NA	NA	NA	NA	-2.62319	-0.388496	-0.380695	-1.48971	-5.2973	-1.22052	4.07677	0	0
848	sp|P55198|AF17_HUMAN	sp|P55198|AF17_HUMAN	5	sp|P55198|AF17_HUMAN Protein AF-17 OS=Homo sapiens GN=MLLT6 PE=1 SV=2	-5.17856	-1.10496	sp|P55198|AF17_HUMAN	4.07359	2.94035	5.20684	-2.85079	8.0614	1.46333e-05	0.000233341	3.58168	1	NA	184540	120470	1347000	2517800	4757900	6451400	4587700	NA	-5.09841	-5.6819	-4.75536	-1.55593	-1.5245	-0.80575	-0.533672	-5.17856	-1.10496	4.07359	1.46333e-05	0.000233341
1642	sp|Q8N1G0|ZN687_HUMAN	sp|Q8N1G0|ZN687_HUMAN	12	sp|Q8N1G0|ZN687_HUMAN Zinc finger protein 687 OS=Homo sapiens GN=ZNF687 PE=1 SV=1	-3.03421	1.02572	sp|Q8N1G0|ZN687_HUMAN	4.05993	2.82184	5.29802	-1.00425	7.25562	2.05692e-05	0.000292429	3.23455	0	280760	620670	381980	10530000	18334000	20468000	26991000	17122000	-3.38992	-3.32199	-3.91851	-1.50643	1.11913	0.533773	1.18221	1.26776	-3.03421	1.02572	4.05993	2.05692e-05	0.000292429
835	sp|P54198|HIRA_HUMAN	sp|P54198|HIRA_HUMAN	16	sp|P54198|HIRA_HUMAN Protein HIRA OS=Homo sapiens GN=HIRA PE=1 SV=2	-2.3801	1.67717	sp|P54198|HIRA_HUMAN	4.05727	2.49828	5.61625	-0.061657	5.83644	0.000197423	0.00133119	1.1156	1	NA	1542100	350720	13600000	36371000	55099000	31783000	17875000	NA	-1.98909	-4.04898	-1.10221	2.04211	1.93073	1.40922	1.32663	-2.3801	1.67717	4.05727	0.000197423	0.00133119
1937	sp|Q96PK6|RBM14_HUMAN	sp|Q96PK6|RBM14_HUMAN	32	sp|Q96PK6|RBM14_HUMAN RNA-binding protein 14 OS=Homo sapiens GN=RBM14 PE=1 SV=2	1.84516	5.89783	sp|Q96PK6|RBM14_HUMAN	4.05267	2.99957	5.10576	3.8715	8.51495	4.77574e-06	0.000128431	4.61498	0	7897100	11032000	26671000	120910000	616030000	799330000	857360000	563620000	1.56825	0.892662	2.56979	2.34995	5.85457	5.70382	5.9859	6.04702	1.84516	5.89783	4.05267	4.77574e-06	0.000128431
1382	sp|Q5BJF6|ODFP2_HUMAN	sp|Q5BJF6|ODFP2_HUMAN	5	sp|Q5BJF6|ODFP2_HUMAN Outer dense fiber protein 2 OS=Homo sapiens GN=ODF2 PE=1 SV=1	NA	-1.24488	sp|Q5BJF6|ODFP2_HUMAN	NA	NA	NA	-1.24488	NA	NA	NA	NA	4	NA	NA	NA	NA	1763700	8457100	3535200	4403900	NA	NA	NA	NA	-2.03556	-0.713073	-1.64128	-0.589601	-5.2973	-1.24488	4.05242	0	0
2550	sp|Q9Y4B4|ARIP4_HUMAN	sp|Q9Y4B4|ARIP4_HUMAN	12	sp|Q9Y4B4|ARIP4_HUMAN Helicase ARIP4 OS=Homo sapiens GN=RAD54L2 PE=1 SV=4	-5.17401	-1.12833	sp|Q9Y4B4|ARIP4_HUMAN	4.04568	2.36653	5.72484	-2.47689	5.49492	0.000459017	0.00242345	0.384619	2	40481	369810	NA	NA	3434400	4525400	8727200	2445100	-6.26766	-4.08036	NA	NA	-1.13763	-1.59518	-0.386064	-1.39445	-5.17401	-1.12833	4.04568	0.000459017	0.00242345
325	sp|O95644|NFAC1_HUMAN	sp|O95644|NFAC1_HUMAN	9	sp|O95644|NFAC1_HUMAN Nuclear factor of activated T-cells, cytoplasmic 1 OS=Homo sapiens GN=NFATC1 PE=1 SV=3	-4.95625	-0.913693	sp|O95644|NFAC1_HUMAN	4.04256	1.32891	6.75622	-1.72221	3.47169	0.00922665	0.0244113	-2.3457	3	NA	203350	NA	NA	1242700	17790000	11466000	2302800	NA	-4.95625	NA	NA	-2.50732	0.335958	-0.00694484	-1.47646	-4.95625	-0.913693	4.04256	0.00922665	0.0244113
1375	sp|Q53H96|P5CR3_HUMAN	sp|Q53H96|P5CR3_HUMAN	4	sp|Q53H96|P5CR3_HUMAN Pyrroline-5-carboxylate reductase 3 OS=Homo sapiens GN=PYCRL PE=1 SV=3	NA	-1.26839	sp|Q53H96|P5CR3_HUMAN	NA	NA	NA	-1.26839	NA	NA	NA	NA	4	NA	NA	NA	NA	8796500	10163000	2789300	888660	NA	NA	NA	NA	0.129605	-0.453862	-1.97044	-2.77888	-5.2973	-1.26839	4.0289	0	0
2092	sp|Q9C005|DPY30_HUMAN	sp|Q9C005|DPY30_HUMAN	5	sp|Q9C005|DPY30_HUMAN Protein dpy-30 homolog OS=Homo sapiens GN=DPY30 PE=1 SV=1	-2.80733	1.21027	sp|Q9C005|DPY30_HUMAN	4.01761	1.83024	6.20497	-0.128928	4.18896	0.00262916	0.00894302	-1.30486	2	NA	NA	279280	12642000	33394000	53430000	11479000	14412000	NA	NA	-4.39705	-1.21762	1.92705	1.88734	-0.00537089	1.03207	-2.80733	1.21027	4.01761	0.00262916	0.00894302
2409	sp|Q9UIU6|SIX4_HUMAN	sp|Q9UIU6|SIX4_HUMAN	6	sp|Q9UIU6|SIX4_HUMAN Homeobox protein SIX4 OS=Homo sapiens GN=SIX4 PE=1 SV=2	-4.95275	-0.938505	sp|Q9UIU6|SIX4_HUMAN	4.01425	2.51969	5.50881	-2.6589	6.02346	0.000154966	0.00113602	1.35053	1	NA	372100	77885	1646100	5812800	10056000	5625100	1739100	NA	-4.07132	-6.34842	-4.43853	-0.428606	-0.468793	-0.996126	-1.8605	-4.95275	-0.938505	4.01425	0.000154966	0.00113602
1997	sp|Q99708|COM1_HUMAN	sp|Q99708|COM1_HUMAN	4	sp|Q99708|COM1_HUMAN DNA endonuclease RBBP8 OS=Homo sapiens GN=RBBP8 PE=1 SV=2	-5.28996	-1.27991	sp|Q99708|COM1_HUMAN	4.01005	1.4776	6.5425	-2.08192	3.69017	0.00679234	0.01896	-2.05781	3	NA	NA	NA	960320	8762600	5851000	1573200	2726600	NA	NA	NA	-5.28996	0.124402	-1.23276	-2.7659	-1.24539	-5.28996	-1.27991	4.01005	0.00679234	0.01896
1848	sp|Q96BN2|TADA1_HUMAN	sp|Q96BN2|TADA1_HUMAN	5	sp|Q96BN2|TADA1_HUMAN Transcriptional adapter 1 OS=Homo sapiens GN=TADA1 PE=1 SV=1	-4.2068	-0.197654	sp|Q96BN2|TADA1_HUMAN	4.00915	2.36179	5.65651	-1.53404	5.55038	0.000428522	0.00231422	0.450173	2	142640	386040	NA	NA	19613000	7472600	6101400	5729300	-4.39615	-4.01745	NA	NA	1.20999	-0.887664	-0.883227	-0.229717	-4.2068	-0.197654	4.00915	0.000428522	0.00231422
1969	sp|Q96T58|MINT_HUMAN	sp|Q96T58|MINT_HUMAN	118	sp|Q96T58|MINT_HUMAN Msx2-interacting protein OS=Homo sapiens GN=SPEN PE=1 SV=1	2.00182	6.00313	sp|Q96T58|MINT_HUMAN	4.00131	2.88419	5.11843	4.00248	7.92523	9.2631e-06	0.000183705	3.99385	0	5861600	26908000	13628000	199320000	622540000	1183700000	908310000	477430000	1.12534	2.1985	1.54374	3.13971	5.86874	6.25769	6.06609	5.82001	2.00182	6.00313	4.00131	9.2631e-06	0.000183705
1226	sp|Q14807|KIF22_HUMAN	sp|Q14807|KIF22_HUMAN	16	sp|Q14807|KIF22_HUMAN Kinesin-like protein KIF22 OS=Homo sapiens GN=KIF22 PE=1 SV=5	-3.7805	0.210622	sp|Q14807|KIF22_HUMAN	3.99112	1.9569	6.02534	-1.11975	4.47463	0.0017572	0.00646958	-0.911506	2	NA	728770	NA	1609400	16352000	28439000	3294300	10656000	NA	-3.08684	NA	-4.47415	0.96498	0.997747	-1.73931	0.61907	-3.7805	0.210622	3.99112	0.0017572	0.00646958
2157	sp|Q9H582|ZN644_HUMAN	sp|Q9H582|ZN644_HUMAN	21	sp|Q9H582|ZN644_HUMAN Zinc finger protein 644 OS=Homo sapiens GN=ZNF644 PE=1 SV=2	-2.55351	1.43439	sp|Q9H582|ZN644_HUMAN	3.98791	2.67499	5.30083	0.105091	6.92734	8.82964e-05	0.000762674	1.92488	2	NA	820450	NA	6815600	31586000	27280000	40536000	16287000	NA	-2.9133	NA	-2.19373	1.85205	0.939051	1.7471	1.19937	-2.55351	1.43439	3.98791	8.82964e-05	0.000762674
1410	sp|Q5T5X7|BEND3_HUMAN	sp|Q5T5X7|BEND3_HUMAN	2	sp|Q5T5X7|BEND3_HUMAN BEN domain-containing protein 3 OS=Homo sapiens GN=BEND3 PE=1 SV=1	-7.33528	-3.34879	sp|Q5T5X7|BEND3_HUMAN	3.98648	2.03422	5.93875	-4.34541	4.89742	0.00212857	0.00753136	-0.922624	4	NA	NA	NA	263150	770330	1564300	746700	NA	NA	NA	NA	-7.33528	-3.15167	-3.0937	-3.801	NA	-7.33528	-3.34879	3.98648	0.00212857	0.00753136
2435	sp|Q9UL18|AGO1_HUMAN	sp|Q9UL18|AGO1_HUMAN	13	sp|Q9UL18|AGO1_HUMAN Protein argonaute-1 OS=Homo sapiens GN=AGO1 PE=1 SV=3	-6.3059	-2.3409	sp|Q9UL18|AGO1_HUMAN	3.965	1.24847	6.68153	-3.66257	3.32881	0.00947748	0.0248245	-2.56026	2	135120	NA	NA	158610	1558700	11241000	883810	614690	-4.47663	NA	NA	-8.13517	-2.20205	-0.311645	-3.56684	-3.28306	-6.3059	-2.3409	3.965	0.00947748	0.0248245
1850	sp|Q96BR5|COA7_HUMAN	sp|Q96BR5|COA7_HUMAN	6	sp|Q96BR5|COA7_HUMAN Cytochrome c oxidase assembly factor 7 OS=Homo sapiens GN=COA7 PE=1 SV=2	-4.30197	-0.366285	sp|Q96BR5|COA7_HUMAN	3.93568	1.57763	6.29374	-1.15342	3.88959	0.00516648	0.0152602	-1.80163	3	NA	317880	NA	NA	4224400	4777300	21270000	7085800	NA	-4.30197	NA	NA	-0.858672	-1.51876	0.851341	0.0609487	-4.30197	-0.366285	3.93568	0.00516648	0.0152602
1408	sp|Q5T481|RBM20_HUMAN	sp|Q5T481|RBM20_HUMAN	4	sp|Q5T481|RBM20_HUMAN RNA-binding protein 20 OS=Homo sapiens GN=RBM20 PE=1 SV=3	NA	-1.3763	sp|Q5T481|RBM20_HUMAN	NA	NA	NA	-1.3763	NA	NA	NA	NA	4	NA	NA	NA	NA	3359500	6647500	5281000	1355500	NA	NA	NA	NA	-1.16734	-1.05272	-1.0838	-2.20136	-5.2973	-1.3763	3.92099	0	0
281	sp|O76064|RNF8_HUMAN	sp|O76064|RNF8_HUMAN	12	sp|O76064|RNF8_HUMAN E3 ubiquitin-protein ligase RNF8 OS=Homo sapiens GN=RNF8 PE=1 SV=1	-2.6589	1.25617	sp|O76064|RNF8_HUMAN	3.91507	2.8534	4.97673	-0.701367	8.15947	7.08939e-06	0.000157839	4.2457	0	538370	1358100	617620	4488500	10520000	31322000	40302000	24917000	-2.42251	-2.17518	-3.18425	-2.85367	0.370685	1.13396	1.73906	1.78095	-2.6589	1.25617	3.91507	7.08939e-06	0.000157839
236	sp|O75362|ZN217_HUMAN	sp|O75362|ZN217_HUMAN	6	sp|O75362|ZN217_HUMAN Zinc finger protein 217 OS=Homo sapiens GN=ZNF217 PE=1 SV=1	NA	-1.38333	sp|O75362|ZN217_HUMAN	NA	NA	NA	-1.38333	NA	NA	NA	NA	4	NA	NA	NA	NA	1762200	10237000	4233400	2010600	NA	NA	NA	NA	-2.03671	-0.443628	-1.39093	-1.66207	-5.2973	-1.38333	3.91396	0	0
596	sp|P31249|HXD3_HUMAN	sp|P31249|HXD3_HUMAN	9	sp|P31249|HXD3_HUMAN Homeobox protein Hox-D3 OS=Homo sapiens GN=HOXD3 PE=1 SV=3	NA	-1.38419	sp|P31249|HXD3_HUMAN	NA	NA	NA	-1.38419	NA	NA	NA	NA	4	NA	NA	NA	NA	1203400	4432200	4658200	6283200	NA	NA	NA	NA	-2.55062	-1.62453	-1.25811	-0.103484	-5.2973	-1.38419	3.91311	0	0
2480	sp|Q9UPW0|FOXJ3_HUMAN	sp|Q9UPW0|FOXJ3_HUMAN	3	sp|Q9UPW0|FOXJ3_HUMAN Forkhead box protein J3 OS=Homo sapiens GN=FOXJ3 PE=1 SV=2	NA	-1.39102	sp|Q9UPW0|FOXJ3_HUMAN	NA	NA	NA	-1.39102	NA	NA	NA	NA	4	NA	NA	NA	NA	2691800	4304700	5096200	2621400	NA	NA	NA	NA	-1.46589	-1.66571	-1.13328	-1.29921	-5.2973	-1.39102	3.90627	0	0
1368	sp|Q52LR7|EPC2_HUMAN	sp|Q52LR7|EPC2_HUMAN	14	sp|Q52LR7|EPC2_HUMAN Enhancer of polycomb homolog 2 OS=Homo sapiens GN=EPC2 PE=1 SV=2	-2.9112	0.991113	sp|Q52LR7|EPC2_HUMAN	3.90231	2.62246	5.18216	-0.960041	6.7464	3.90801e-05	0.00045433	2.6159	0	343920	717210	413120	9631400	36951000	19381000	22301000	9963400	-3.08841	-3.11026	-3.79876	-1.64736	2.06343	0.456793	0.917088	0.527145	-2.9112	0.991113	3.90231	3.90801e-05	0.00045433
1402	sp|Q5T0B9|ZN362_HUMAN	sp|Q5T0B9|ZN362_HUMAN	12	sp|Q5T0B9|ZN362_HUMAN Zinc finger protein 362 OS=Homo sapiens GN=ZNF362 PE=1 SV=1	-1.22828	2.66942	sp|Q5T0B9|ZN362_HUMAN	3.8977	2.21878	5.57661	1.88988	5.41025	0.000777201	0.00350037	-0.0757418	3	NA	NA	NA	12557000	44511000	109310000	84602000	48687000	NA	NA	NA	-1.22828	2.31423	2.89713	2.76909	2.69722	-1.22828	2.66942	3.8977	0.000777201	0.00350037
2557	sp|Q9Y4Z0|LSM4_HUMAN	sp|Q9Y4Z0|LSM4_HUMAN	6	sp|Q9Y4Z0|LSM4_HUMAN U6 snRNA-associated Sm-like protein LSm4 OS=Homo sapiens GN=LSM4 PE=1 SV=1	-4.23109	-0.333771	sp|Q9Y4Z0|LSM4_HUMAN	3.89732	2.6832	5.11144	-2.28243	7.10254	2.4864e-05	0.000329658	3.05243	0	165440	288800	329590	1960800	14749000	15749000	6827600	2106900	-4.17581	-4.44248	-4.14394	-4.16213	0.825963	0.164052	-0.727026	-1.59807	-4.23109	-0.333771	3.89732	2.4864e-05	0.000329658
2195	sp|Q9HAT8|PELI2_HUMAN	sp|Q9HAT8|PELI2_HUMAN	5	sp|Q9HAT8|PELI2_HUMAN E3 ubiquitin-protein ligase pellino homolog 2 OS=Homo sapiens GN=PELI2 PE=1 SV=1	NA	-1.40007	sp|Q9HAT8|PELI2_HUMAN	NA	NA	NA	-1.40007	NA	NA	NA	NA	4	NA	NA	NA	NA	728600	3991600	12683000	3961200	NA	NA	NA	NA	-3.22671	-1.77224	0.133174	-0.734515	-5.2973	-1.40007	3.89722	0	0
1548	sp|Q7Z5J4|RAI1_HUMAN	sp|Q7Z5J4|RAI1_HUMAN	25	sp|Q7Z5J4|RAI1_HUMAN Retinoic acid-induced protein 1 OS=Homo sapiens GN=RAI1 PE=1 SV=2	-2.37425	1.52092	sp|Q7Z5J4|RAI1_HUMAN	3.89517	1.25167	6.53867	0.741885	3.43388	0.00973538	0.0253873	-2.39623	3	NA	NA	NA	6079700	37973000	79046000	8952100	27071000	NA	NA	NA	-2.37425	2.10019	2.43985	-0.350722	1.89437	-2.37425	1.52092	3.89517	0.00973538	0.0253873
1005	sp|P85037|FOXK1_HUMAN	sp|P85037|FOXK1_HUMAN	20	sp|P85037|FOXK1_HUMAN Forkhead box protein K1 OS=Homo sapiens GN=FOXK1 PE=1 SV=1	-0.448165	3.44163	sp|P85037|FOXK1_HUMAN	3.88979	2.68931	5.09027	1.49673	7.16936	2.2881e-05	0.000312522	3.13233	0	1024500	2934400	5796900	37095000	92853000	221680000	94628000	97162000	-1.46644	-1.04685	0.237506	0.483133	3.30494	3.89456	2.92466	3.64236	-0.448165	3.44163	3.88979	2.2881e-05	0.000312522
1970	sp|Q96T60|PNKP_HUMAN	sp|Q96T60|PNKP_HUMAN	3	sp|Q96T60|PNKP_HUMAN Bifunctional polynucleotide phosphatase/kinase OS=Homo sapiens GN=PNKP PE=1 SV=1	-7.61165	-3.73851	sp|Q96T60|PNKP_HUMAN	3.87314	1.91209	5.83418	-4.70679	4.73686	0.00253699	0.00867725	-1.07936	4	NA	NA	NA	220920	NA	1364600	726090	340940	NA	NA	NA	-7.61165	NA	-3.28637	-3.83988	-4.08928	-7.61165	-3.73851	3.87314	0.00253699	0.00867725
2197	sp|Q9HAZ2|PRD16_HUMAN	sp|Q9HAZ2|PRD16_HUMAN	10	sp|Q9HAZ2|PRD16_HUMAN PR domain zinc finger protein 16 OS=Homo sapiens GN=PRDM16 PE=1 SV=3	NA	-1.42724	sp|Q9HAZ2|PRD16_HUMAN	NA	NA	NA	-1.42724	NA	NA	NA	NA	4	NA	NA	NA	NA	1301000	5936600	6517000	2698700	NA	NA	NA	NA	-2.44555	-1.21227	-0.791697	-1.25946	-5.2973	-1.42724	3.87005	0	0
2234	sp|Q9NPG3|UBN1_HUMAN	sp|Q9NPG3|UBN1_HUMAN	14	sp|Q9NPG3|UBN1_HUMAN Ubinuclein-1 OS=Homo sapiens GN=UBN1 PE=1 SV=2	-3.89507	-0.0383896	sp|Q9NPG3|UBN1_HUMAN	3.85668	2.31926	5.3941	-1.69125	5.62571	0.000260837	0.00159881	0.844321	1	NA	289440	311900	4045800	2368800	24848000	15491000	8233400	NA	-4.43924	-4.22824	-3.01773	-1.63813	0.807326	0.410971	0.266271	-3.89507	-0.0383896	3.85668	0.000260837	0.00159881
1979	sp|Q99496|RING2_HUMAN	sp|Q99496|RING2_HUMAN	13	sp|Q99496|RING2_HUMAN E3 ubiquitin-protein ligase RING2 OS=Homo sapiens GN=RNF2 PE=1 SV=1	-0.23427	3.61819	sp|Q99496|RING2_HUMAN	3.85246	2.60687	5.09806	1.69196	6.84336	3.44997e-05	0.000413296	2.73655	0	1620900	2275300	6106500	49850000	142850000	180580000	180790000	68201000	-0.784734	-1.41943	0.317014	0.950066	3.88537	3.60528	3.82388	3.15825	-0.23427	3.61819	3.85246	3.44997e-05	0.000413296
1093	sp|Q12857|NFIA_HUMAN	sp|Q12857|NFIA_HUMAN	15	sp|Q12857|NFIA_HUMAN Nuclear factor 1 A-type OS=Homo sapiens GN=NFIA PE=1 SV=2	-0.843561	3.00265	sp|Q12857|NFIA_HUMAN	3.84621	2.52999	5.16244	1.72058	6.66441	0.000117269	0.00093815	1.66502	2	NA	NA	2647200	17247000	50359000	171210000	76579000	79576000	NA	NA	-0.96026	-0.726863	2.48056	3.53011	2.6307	3.36924	-0.843561	3.00265	3.84621	0.000117269	0.00093815
1880	sp|Q96EY1|DNJA3_HUMAN	sp|Q96EY1|DNJA3_HUMAN	15	sp|Q96EY1|DNJA3_HUMAN DnaJ homolog subfamily A member 3, mitochondrial OS=Homo sapiens GN=DNAJA3 PE=1 SV=2	-1.1749	2.66988	sp|Q96EY1|DNJA3_HUMAN	3.84479	2.39625	5.29332	0.74749	5.8729	0.000126943	0.00100532	1.46593	0	1282400	1070300	5936200	11874000	85837000	79214000	35843000	85123000	-1.13281	-2.52396	0.273792	-1.31664	3.19908	2.44284	1.5762	3.46141	-1.1749	2.66988	3.84479	0.000126943	0.00100532
1939	sp|Q96PV6|LENG8_HUMAN	sp|Q96PV6|LENG8_HUMAN	25	sp|Q96PV6|LENG8_HUMAN Leukocyte receptor cluster member 8 OS=Homo sapiens GN=LENG8 PE=1 SV=2	-0.574632	3.26432	sp|Q96PV6|LENG8_HUMAN	3.83895	2.16958	5.50832	1.34484	5.08825	0.000399929	0.00219021	0.333045	0	795240	7061200	1415900	59197000	38619000	169280000	164410000	103460000	-1.84285	0.239196	-1.91646	1.22158	2.12292	3.51412	3.69196	3.72826	-0.574632	3.26432	3.83895	0.000399929	0.00219021
2506	sp|Q9Y2K7|KDM2A_HUMAN	sp|Q9Y2K7|KDM2A_HUMAN	5	sp|Q9Y2K7|KDM2A_HUMAN Lysine-specific demethylase 2A OS=Homo sapiens GN=KDM2A PE=1 SV=3	-5.72944	-1.90922	sp|Q9Y2K7|KDM2A_HUMAN	3.82022	1.98022	5.66022	-3.54646	4.65615	0.00101859	0.00432352	-0.494449	1	NA	47810	103060	1924800	2260900	1236900	7054300	1779200	NA	-7.07649	-5.92043	-4.19141	-1.70094	-3.42498	-0.681655	-1.82931	-5.72944	-1.90922	3.82022	0.00101859	0.00432352
1438	sp|Q63ZY3|KANK2_HUMAN	sp|Q63ZY3|KANK2_HUMAN	2	sp|Q63ZY3|KANK2_HUMAN KN motif and ankyrin repeat domain-containing protein 2 OS=Homo sapiens GN=KANK2 PE=1 SV=1	-9.1118	-5.32024	sp|Q63ZY3|KANK2_HUMAN	3.79156	1.32233	6.2608	-6.26813	3.68274	0.00882163	0.0234978	-2.22414	4	NA	NA	NA	85482	150040	694060	117910	NA	NA	NA	NA	-9.1118	-5.35588	-4.24008	-6.36475	NA	-9.1118	-5.32024	3.79156	0.00882163	0.0234978
254	sp|O75529|TAF5L_HUMAN	sp|O75529|TAF5L_HUMAN	9	sp|O75529|TAF5L_HUMAN TAF5-like RNA polymerase II p300/CBP-associated factor-associated factor 65 kDa subunit 5L OS=Homo sapiens GN=TAF5L PE=1 SV=1	-3.91206	-0.122565	sp|O75529|TAF5L_HUMAN	3.7895	2.13668	5.44232	-1.74664	5.14177	0.000506257	0.00259613	0.194719	1	NA	481760	381350	2011100	17257000	24107000	2639700	5663900	NA	-3.69304	-3.92104	-4.12211	1.03756	0.764617	-2.04701	-0.245421	-3.91206	-0.122565	3.7895	0.000506257	0.00259613
818	sp|P52926|HMGA2_HUMAN	sp|P52926|HMGA2_HUMAN	6	sp|P52926|HMGA2_HUMAN High mobility group protein HMGI-C OS=Homo sapiens GN=HMGA2 PE=1 SV=1	-0.894958	2.87769	sp|P52926|HMGA2_HUMAN	3.77265	2.64847	4.89683	0.991366	7.42539	1.67219e-05	0.000251361	3.43274	0	1715500	1739300	5056600	13660000	64784000	160470000	58253000	60809000	-0.700447	-1.81285	0.0287215	-1.09525	2.81994	3.43872	2.25077	3.00133	-0.894958	2.87769	3.77265	1.67219e-05	0.000251361
1014	sp|Q00610|CLH1_HUMAN;sp|P53675|CLH2_HUMAN	sp|Q00610|CLH1_HUMAN	3	sp|Q00610|CLH1_HUMAN Clathrin heavy chain 1 OS=Homo sapiens GN=CLTC PE=1 SV=5;sp|P53675|CLH2_HUMAN Clathrin heavy chain 2 OS=Homo sapiens GN=CLTCL1 PE=1 SV=2	-6.55236	-2.78848	sp|Q00610|CLH1_HUMAN	3.76388	2.1269	5.40085	-4.67042	5.51453	0.00111999	0.00458885	-0.317098	4	NA	66132	70375	NA	1190900	NA	1317500	NA	NA	-6.60136	-6.50336	NA	-2.56469	NA	-3.01228	NA	-6.55236	-2.78848	3.76388	0.00111999	0.00458885
1468	sp|Q6P0N0|M18BP_HUMAN	sp|Q6P0N0|M18BP_HUMAN	6	sp|Q6P0N0|M18BP_HUMAN Mis18-binding protein 1 OS=Homo sapiens GN=MIS18BP1 PE=1 SV=1	-5.55302	-1.82365	sp|Q6P0N0|M18BP_HUMAN	3.72937	2.11792	5.34082	-3.06677	5.27812	0.000602993	0.0029221	0.123552	2	NA	143140	NA	771640	4999900	3959200	1364600	1670200	NA	-5.47047	NA	-5.63557	-0.631582	-1.78373	-2.96349	-1.91579	-5.55302	-1.82365	3.72937	0.000602993	0.0029221
467	sp|P15336|ATF2_HUMAN	sp|P15336|ATF2_HUMAN	3	sp|P15336|ATF2_HUMAN Cyclic AMP-dependent transcription factor ATF-2 OS=Homo sapiens GN=ATF2 PE=1 SV=4	NA	-1.57221	sp|P15336|ATF2_HUMAN	NA	NA	NA	-1.57221	NA	NA	NA	NA	4	NA	NA	NA	NA	5606800	5165300	1753200	1834300	NA	NA	NA	NA	-0.477223	-1.4086	-2.61543	-1.7876	-5.2973	-1.57221	3.72509	0	0
1058	sp|Q06330|SUH_HUMAN	sp|Q06330|SUH_HUMAN	11	sp|Q06330|SUH_HUMAN Recombining binding protein suppressor of hairless OS=Homo sapiens GN=RBPJ PE=1 SV=3	-2.46104	1.2599	sp|Q06330|SUH_HUMAN	3.72093	2.45076	4.9911	0.0195848	6.68112	0.000115146	0.000927199	1.68182	2	NA	NA	882390	6441200	17723000	25459000	42750000	17576000	NA	NA	-2.63908	-2.28299	1.07346	0.841595	1.82097	1.30355	-2.46104	1.2599	3.72093	0.000115146	0.000927199
2371	sp|Q9UBL3|ASH2L_HUMAN	sp|Q9UBL3|ASH2L_HUMAN	15	sp|Q9UBL3|ASH2L_HUMAN Set1/Ash2 histone methyltransferase complex subunit ASH2 OS=Homo sapiens GN=ASH2L PE=1 SV=1	-1.73905	1.97116	sp|Q9UBL3|ASH2L_HUMAN	3.71021	2.2382	5.18221	0.381068	5.65255	0.00025166	0.00156294	0.879259	1	NA	3895300	638440	10902000	60933000	52990000	34184000	24560000	NA	-0.631991	-3.13358	-1.45157	2.73736	1.87568	1.51037	1.76121	-1.73905	1.97116	3.71021	0.00025166	0.00156294
1601	sp|Q8IU81|I2BP1_HUMAN	sp|Q8IU81|I2BP1_HUMAN	5	sp|Q8IU81|I2BP1_HUMAN Interferon regulatory factor 2-binding protein 1 OS=Homo sapiens GN=IRF2BP1 PE=1 SV=1	-5.25865	-1.57013	sp|Q8IU81|I2BP1_HUMAN	3.68852	2.34239	5.03465	-3.41439	6.06281	9.74102e-05	0.000815676	1.7258	0	102130	214670	107760	888460	1279200	5509900	11549000	1091400	-4.89257	-4.87691	-5.85228	-5.41285	-2.46832	-1.3175	0.00307371	-2.49778	-5.25865	-1.57013	3.68852	9.74102e-05	0.000815676
1815	sp|Q92922|SMRC1_HUMAN	sp|Q92922|SMRC1_HUMAN	26	sp|Q92922|SMRC1_HUMAN SWI/SNF complex subunit SMARCC1 OS=Homo sapiens GN=SMARCC1 PE=1 SV=3	-0.11602	3.56396	sp|Q92922|SMRC1_HUMAN	3.67998	2.16423	5.19574	1.72397	5.37187	0.0002615	0.00159881	0.753549	0	853130	4005700	10441000	43334000	247750000	175630000	121360000	52190000	-1.73844	-0.59106	1.13667	0.728745	4.62727	3.56607	3.27025	2.79226	-0.11602	3.56396	3.67998	0.0002615	0.00159881
890	sp|P61371|ISL1_HUMAN	sp|P61371|ISL1_HUMAN	5	sp|P61371|ISL1_HUMAN Insulin gene enhancer protein ISL-1 OS=Homo sapiens GN=ISL1 PE=1 SV=1	NA	-1.62403	sp|P61371|ISL1_HUMAN	NA	NA	NA	-1.62403	NA	NA	NA	NA	4	NA	NA	NA	NA	1422000	5878500	2951800	3139600	NA	NA	NA	NA	-2.32572	-1.22615	-1.89179	-1.05247	-5.2973	-1.62403	3.67326	0	0
1610	sp|Q8IVW6|ARI3B_HUMAN	sp|Q8IVW6|ARI3B_HUMAN	31	sp|Q8IVW6|ARI3B_HUMAN AT-rich interactive domain-containing protein 3B OS=Homo sapiens GN=ARID3B PE=1 SV=2	1.57235	5.2455	sp|Q8IVW6|ARI3B_HUMAN	3.67315	2.75353	4.59278	3.40892	8.83766	3.37274e-06	0.000117227	4.93725	0	6230500	24130000	10491000	90399000	334460000	578770000	554450000	331630000	1.21603	2.03891	1.14397	1.89048	5.03162	5.24835	5.38046	5.32157	1.57235	5.2455	3.67315	3.37274e-06	0.000117227
840	sp|P54886|P5CS_HUMAN	sp|P54886|P5CS_HUMAN	7	sp|P54886|P5CS_HUMAN Delta-1-pyrroline-5-carboxylate synthase OS=Homo sapiens GN=ALDH18A1 PE=1 SV=2	-4.77163	-1.1123	sp|P54886|P5CS_HUMAN	3.65933	1.23928	6.07939	-2.02713	3.62654	0.00947221	0.0248245	-2.2908	4	110790	NA	NA	NA	6278000	8201200	NA	1302800	-4.77163	NA	NA	NA	-0.324872	-0.756417	NA	-2.2556	-4.77163	-1.1123	3.65933	0.00947221	0.0248245
2426	sp|Q9UKL0|RCOR1_HUMAN	sp|Q9UKL0|RCOR1_HUMAN	12	sp|Q9UKL0|RCOR1_HUMAN REST corepressor 1 OS=Homo sapiens GN=RCOR1 PE=1 SV=1	-2.75603	0.898361	sp|Q9UKL0|RCOR1_HUMAN	3.6544	2.51875	4.79004	-0.667809	7.21657	3.67269e-05	0.000435555	2.7262	1	NA	1488400	478270	5099200	18122000	24508000	21474000	12501000	NA	-2.041	-3.57498	-2.65212	1.10346	0.78789	0.8646	0.837495	-2.75603	0.898361	3.6544	3.67269e-05	0.000435555
385	sp|P06576|ATPB_HUMAN	sp|P06576|ATPB_HUMAN	5	sp|P06576|ATPB_HUMAN ATP synthase subunit beta, mitochondrial OS=Homo sapiens GN=ATP5B PE=1 SV=3	NA	-1.65106	sp|P06576|ATPB_HUMAN	NA	NA	NA	-1.65106	NA	NA	NA	NA	4	NA	NA	NA	NA	4352100	2835100	1813500	3353300	NA	NA	NA	NA	-0.818545	-2.25485	-2.56846	-0.9624	-5.2973	-1.65106	3.64623	0	0
206	sp|O60583|CCNT2_HUMAN	sp|O60583|CCNT2_HUMAN	11	sp|O60583|CCNT2_HUMAN Cyclin-T2 OS=Homo sapiens GN=CCNT2 PE=1 SV=2	-2.91386	0.725964	sp|O60583|CCNT2_HUMAN	3.63983	2.50912	4.77054	-1.09395	7.12258	2.42504e-05	0.000323339	3.07646	0	371040	1490600	796300	2396600	7813700	23918000	21964000	17332000	-2.97563	-2.03884	-2.79595	-3.84503	-0.0300271	0.753514	0.895938	1.28443	-2.91386	0.725964	3.63983	2.42504e-05	0.000323339
2034	sp|Q9BSJ5|CQ080_HUMAN	sp|Q9BSJ5|CQ080_HUMAN	6	sp|Q9BSJ5|CQ080_HUMAN Uncharacterized protein C17orf80 OS=Homo sapiens GN=C17orf80 PE=2 SV=2	-4.6137	-0.974088	sp|Q9BSJ5|CQ080_HUMAN	3.63961	1.95626	5.32297	-2.53392	4.84881	0.000768731	0.00346884	-0.216609	1	NA	173480	202850	2518700	1138200	5196000	10410000	8260200	NA	-5.18892	-4.88566	-3.76652	-2.62567	-1.40024	-0.14115	0.270716	-4.6137	-0.974088	3.63961	0.000768731	0.00346884
472	sp|P16220|CREB1_HUMAN	sp|P16220|CREB1_HUMAN	5	sp|P16220|CREB1_HUMAN Cyclic AMP-responsive element-binding protein 1 OS=Homo sapiens GN=CREB1 PE=1 SV=2	-2.11999	1.5078	sp|P16220|CREB1_HUMAN	3.62779	2.26717	4.98841	0.298538	6.08088	0.000226689	0.00145377	1.05243	2	NA	1835100	962900	NA	14836000	43010000	34255000	31526000	NA	-1.73433	-2.50565	NA	0.833888	1.58131	1.51325	2.10276	-2.11999	1.5078	3.62779	0.000226689	0.00145377
1131	sp|Q13227|GPS2_HUMAN	sp|Q13227|GPS2_HUMAN	6	sp|Q13227|GPS2_HUMAN G protein pathway suppressor 2 OS=Homo sapiens GN=GPS2 PE=1 SV=3	-1.86144	1.75424	sp|Q13227|GPS2_HUMAN	3.61568	2.72553	4.50583	-0.0536026	8.98741	2.8797e-06	0.000113178	5.08274	0	827190	1373900	2028300	7069200	28386000	48555000	46576000	22093000	-1.78432	-2.15824	-1.3672	-2.13601	1.70812	1.75237	1.94003	1.61642	-1.86144	1.75424	3.61568	2.8797e-06	0.000113178
630	sp|P35251|RFC1_HUMAN	sp|P35251|RFC1_HUMAN	31	sp|P35251|RFC1_HUMAN Replication factor C subunit 1 OS=Homo sapiens GN=RFC1 PE=1 SV=4	-0.869185	2.7364	sp|P35251|RFC1_HUMAN	3.60559	1.64034	5.57084	0.93361	4.05944	0.00205358	0.00729887	-1.29122	0	505020	1008300	5166400	74771000	35645000	161280000	81810000	51062000	-2.51753	-2.61135	0.061548	1.5906	2.01494	3.44583	2.72248	2.76237	-0.869185	2.7364	3.60559	0.00205358	0.00729887
2208	sp|Q9HCD5|NCOA5_HUMAN	sp|Q9HCD5|NCOA5_HUMAN	17	sp|Q9HCD5|NCOA5_HUMAN Nuclear receptor coactivator 5 OS=Homo sapiens GN=NCOA5 PE=1 SV=2	-0.787381	2.8182	sp|Q9HCD5|NCOA5_HUMAN	3.60558	2.5192	4.69195	1.27295	7.44307	2.84822e-05	0.00035565	2.96465	1	NA	3168500	3088300	17510000	54813000	123410000	55857000	82423000	NA	-0.934441	-0.72475	-0.702952	2.59475	3.06829	2.19243	3.41732	-0.787381	2.8182	3.60558	2.84822e-05	0.00035565
1695	sp|Q8NDX5|PHC3_HUMAN	sp|Q8NDX5|PHC3_HUMAN	3	sp|Q8NDX5|PHC3_HUMAN Polyhomeotic-like protein 3 OS=Homo sapiens GN=PHC3 PE=1 SV=1	-5.2057	-1.60893	sp|Q8NDX5|PHC3_HUMAN	3.59676	1.36329	5.83023	-2.50812	3.86231	0.00705044	0.0195523	-2.0149	4	NA	NA	164520	NA	4847000	3234400	2569600	NA	NA	NA	-5.2057	NA	-0.673429	-2.06897	-2.0844	NA	-5.2057	-1.60893	3.59676	0.00705044	0.0195523
2445	sp|Q9ULM3|YETS2_HUMAN	sp|Q9ULM3|YETS2_HUMAN	39	sp|Q9ULM3|YETS2_HUMAN YEATS domain-containing protein 2 OS=Homo sapiens GN=YEATS2 PE=1 SV=2	-0.29614	3.29586	sp|Q9ULM3|YETS2_HUMAN	3.592	2.3695	4.81449	1.49986	6.50125	5.38459e-05	0.000540781	2.30473	0	1660500	6459100	3683300	25828000	258130000	154720000	79650000	39997000	-0.748867	0.108667	-0.455514	-0.0888455	4.68257	3.38725	2.68531	2.42829	-0.29614	3.29586	3.592	5.38459e-05	0.000540781
1035	sp|Q02880|TOP2B_HUMAN	sp|Q02880|TOP2B_HUMAN	53	sp|Q02880|TOP2B_HUMAN DNA topoisomerase 2-beta OS=Homo sapiens GN=TOP2B PE=1 SV=3	-0.479018	3.08003	sp|Q02880|TOP2B_HUMAN	3.55905	2.29673	4.82136	1.3005	6.23843	7.65862e-05	0.000692503	1.96117	0	3178200	4261000	5587700	8674800	67447000	198800000	59790000	82468000	0.215791	-0.500571	0.181339	-1.81263	2.87422	3.74088	2.28694	3.41807	-0.479018	3.08003	3.55905	7.65862e-05	0.000692503
1772	sp|Q8WYL5|SSH1_HUMAN	sp|Q8WYL5|SSH1_HUMAN	2	sp|Q8WYL5|SSH1_HUMAN Protein phosphatase Slingshot homolog 1 OS=Homo sapiens GN=SSH1 PE=1 SV=2	NA	-1.75005	sp|Q8WYL5|SSH1_HUMAN	NA	NA	NA	-1.75005	NA	NA	NA	NA	4	NA	NA	NA	NA	1870100	5228700	2934800	1882200	NA	NA	NA	NA	-1.95664	-1.39139	-1.89982	-1.75233	-5.2973	-1.75005	3.54725	0	0
446	sp|P12956|XRCC6_HUMAN	sp|P12956|XRCC6_HUMAN	49	sp|P12956|XRCC6_HUMAN X-ray repair cross-complementing protein 6 OS=Homo sapiens GN=XRCC6 PE=1 SV=2	2.93217	6.46228	sp|P12956|XRCC6_HUMAN	3.53012	2.26128	4.79895	4.69722	6.15592	8.57036e-05	0.000746348	1.85118	0	14931000	35103000	90474000	109250000	554170000	2012600000	1258300000	851780000	2.51471	2.58787	4.43636	2.18973	5.71199	7.00646	6.51881	6.61187	2.93217	6.46228	3.53012	8.57036e-05	0.000746348
1032	sp|Q02750|MP2K1_HUMAN	sp|Q02750|MP2K1_HUMAN	2	sp|Q02750|MP2K1_HUMAN Dual specificity mitogen-activated protein kinase kinase 1 OS=Homo sapiens GN=MAP2K1 PE=1 SV=2	-2.67248	0.848161	sp|Q02750|MP2K1_HUMAN	3.52064	1.57803	5.46326	-1.79232	4.34661	0.00394733	0.0123714	-1.47962	4	456230	749290	NA	6361100	14994000	NA	NA	NA	-2.6685	-3.04618	NA	-2.30276	0.848161	NA	NA	NA	-2.67248	0.848161	3.52064	0.00394733	0.0123714
1337	sp|Q1KMD3|HNRL2_HUMAN	sp|Q1KMD3|HNRL2_HUMAN	15	sp|Q1KMD3|HNRL2_HUMAN Heterogeneous nuclear ribonucleoprotein U-like protein 2 OS=Homo sapiens GN=HNRNPUL2 PE=1 SV=1	-1.76635	1.74674	sp|Q1KMD3|HNRL2_HUMAN	3.51309	1.99316	5.03302	-0.00980628	5.11416	0.000384523	0.00213523	0.371968	0	668460	924160	6528700	5123200	21664000	67760000	41601000	22433000	-2.10091	-2.73897	0.419174	-2.6447	1.344	2.22252	1.78313	1.63731	-1.76635	1.74674	3.51309	0.000384523	0.00213523
1341	sp|Q2KHR3|QSER1_HUMAN	sp|Q2KHR3|QSER1_HUMAN	24	sp|Q2KHR3|QSER1_HUMAN Glutamine and serine-rich protein 1 OS=Homo sapiens GN=QSER1 PE=1 SV=3	-1.15452	2.35787	sp|Q2KHR3|QSER1_HUMAN	3.51239	2.47005	4.55473	0.601677	7.45595	1.61157e-05	0.000246877	3.468	0	883140	3969700	1735400	17309000	72218000	69948000	67226000	24325000	-1.68707	-0.604282	-1.60553	-0.721193	2.96631	2.26735	2.44976	1.74806	-1.15452	2.35787	3.51239	1.61157e-05	0.000246877
1702	sp|Q8NEY8|PPHLN_HUMAN	sp|Q8NEY8|PPHLN_HUMAN	9	sp|Q8NEY8|PPHLN_HUMAN Periphilin-1 OS=Homo sapiens GN=PPHLN1 PE=1 SV=2	-2.10718	1.4044	sp|Q8NEY8|PPHLN_HUMAN	3.51158	2.15882	4.86435	-0.351388	5.74366	0.000152443	0.00113128	1.28591	0	897850	1362400	417680	16325000	24467000	27847000	34758000	21959000	-1.66252	-2.17055	-3.78198	-0.813666	1.50794	0.968071	1.5335	1.60809	-2.10718	1.4044	3.51158	0.000152443	0.00113128
1633	sp|Q8IY67|RAVR1_HUMAN	sp|Q8IY67|RAVR1_HUMAN	15	sp|Q8IY67|RAVR1_HUMAN Ribonucleoprotein PTB-binding 1 OS=Homo sapiens GN=RAVER1 PE=1 SV=1	-0.671948	2.83449	sp|Q8IY67|RAVR1_HUMAN	3.50644	1.66545	5.34743	2.1332	4.43867	0.0025074	0.00861348	-1.13133	3	NA	NA	NA	17857000	50161000	76190000	146170000	58405000	NA	NA	NA	-0.671948	2.47525	2.38794	3.52862	2.94615	-0.671948	2.83449	3.50644	0.0025074	0.00861348
2520	sp|Q9Y2X9|ZN281_HUMAN	sp|Q9Y2X9|ZN281_HUMAN	32	sp|Q9Y2X9|ZN281_HUMAN Zinc finger protein 281 OS=Homo sapiens GN=ZNF281 PE=1 SV=1	1.74153	5.24762	sp|Q9Y2X9|ZN281_HUMAN	3.50609	2.50344	4.50874	3.49457	7.7372	1.15304e-05	0.000206609	3.78662	0	6189100	16674000	14137000	147370000	327330000	730500000	488770000	304710000	1.20612	1.4976	1.59977	2.66262	5.00258	5.5768	5.20533	5.20577	1.74153	5.24762	3.50609	1.15304e-05	0.000206609
273	sp|O75925|PIAS1_HUMAN	sp|O75925|PIAS1_HUMAN	11	sp|O75925|PIAS1_HUMAN E3 SUMO-protein ligase PIAS1 OS=Homo sapiens GN=PIAS1 PE=1 SV=2	NA	-1.79122	sp|O75925|PIAS1_HUMAN	NA	NA	NA	-1.79122	NA	NA	NA	NA	4	NA	NA	NA	NA	3843500	15208000	5458900	145310	NA	NA	NA	NA	-0.985991	0.114741	-1.03778	-5.25583	-5.2973	-1.79122	3.50608	0	0
1383	sp|Q5BKZ1|ZN326_HUMAN	sp|Q5BKZ1|ZN326_HUMAN	17	sp|Q5BKZ1|ZN326_HUMAN DBIRD complex subunit ZNF326 OS=Homo sapiens GN=ZNF326 PE=1 SV=2	-0.13483	3.36796	sp|Q5BKZ1|ZN326_HUMAN	3.50279	1.96512	5.04047	1.61657	5.04033	0.000430182	0.00231788	0.260773	0	982570	2617700	13373000	42243000	79142000	211790000	87382000	104200000	-1.52854	-1.21412	1.51488	0.688458	3.08966	3.83017	2.814	3.73801	-0.13483	3.36796	3.50279	0.000430182	0.00231788
1575	sp|Q86UU0|BCL9L_HUMAN	sp|Q86UU0|BCL9L_HUMAN	4	sp|Q86UU0|BCL9L_HUMAN B-cell CLL/lymphoma 9-like protein OS=Homo sapiens GN=BCL9L PE=1 SV=1	NA	-1.80044	sp|Q86UU0|BCL9L_HUMAN	NA	NA	NA	-1.80044	NA	NA	NA	NA	4	NA	NA	NA	NA	3668400	8339800	9049100	164710	NA	NA	NA	NA	-1.04882	-0.732776	-0.335753	-5.08442	-5.2973	-1.80044	3.49686	0	0
1821	sp|Q92993|KAT5_HUMAN	sp|Q92993|KAT5_HUMAN	9	sp|Q92993|KAT5_HUMAN Histone acetyltransferase KAT5 OS=Homo sapiens GN=KAT5 PE=1 SV=2	-3.76095	-0.265633	sp|Q92993|KAT5_HUMAN	3.49532	2.23411	4.75653	-2.01329	6.1321	8.85477e-05	0.000762674	1.81922	0	222380	1024000	273440	1809000	14712000	6883300	7846600	5255600	-3.7363	-2.58873	-4.42934	-4.28944	0.822579	-1.00354	-0.533805	-0.347761	-3.76095	-0.265633	3.49532	8.85477e-05	0.000762674
2017	sp|Q9BQ87|TBL1Y_HUMAN	sp|Q9BQ87|TBL1Y_HUMAN	8	sp|Q9BQ87|TBL1Y_HUMAN F-box-like/WD repeat-containing protein TBL1Y OS=Homo sapiens GN=TBL1Y PE=2 SV=1	-8.44326	-4.95288	sp|Q9BQ87|TBL1Y_HUMAN	3.49037	1.25306	5.72769	-5.65096	3.63566	0.00732718	0.0201775	-2.12896	3	NA	NA	NA	130510	356130	742170	226520	83300	NA	NA	NA	-8.44326	-4.19121	-4.14554	-5.45785	-6.01693	-8.44326	-4.95288	3.49037	0.00732718	0.0201775
1829	sp|Q969J2|ZKSC4_HUMAN	sp|Q969J2|ZKSC4_HUMAN	13	sp|Q969J2|ZKSC4_HUMAN Zinc finger protein with KRAB and SCAN domains 4 OS=Homo sapiens GN=ZKSCAN4 PE=1 SV=1	-0.725617	2.75711	sp|Q969J2|ZKSC4_HUMAN	3.48272	1.98313	4.98231	1.01574	5.13873	0.000370494	0.00208182	0.408786	0	1940300	2002000	1300900	60952000	60406000	119130000	65170000	55552000	-0.517473	-1.60684	-2.0459	1.26774	2.72566	3.01849	2.40662	2.87765	-0.725617	2.75711	3.48272	0.000370494	0.00208182
1869	sp|Q96E14|RMI2_HUMAN	sp|Q96E14|RMI2_HUMAN	2	sp|Q96E14|RMI2_HUMAN RecQ-mediated genome instability protein 2 OS=Homo sapiens GN=RMI2 PE=1 SV=2	-8.88651	-5.40493	sp|Q96E14|RMI2_HUMAN	3.48159	1.58961	5.37356	-6.27532	4.41345	0.00365372	0.011684	-1.4091	4	NA	NA	NA	98583	138920	NA	203320	157320	NA	NA	NA	-8.88651	-5.45964	NA	-5.60794	-5.14721	-8.88651	-5.40493	3.48159	0.00365372	0.011684
1050	sp|Q05209|PTN12_HUMAN	sp|Q05209|PTN12_HUMAN	2	sp|Q05209|PTN12_HUMAN Tyrosine-protein phosphatase non-receptor type 12 OS=Homo sapiens GN=PTPN12 PE=1 SV=3	0.811752	4.28521	sp|Q05209|PTN12_HUMAN	3.47346	-0.40235	7.34927	2.30038	2.00981	0.0735493	0.128658	-4.65949	1	104340	33424000	62640000	81006000	235020000	383420000	157460000	NA	-4.86076	2.51609	3.87453	1.71714	4.5562	4.66747	3.63197	NA	0.811752	4.28521	3.47346	0.0735493	0.128658
2552	sp|Q9Y4C8|RBM19_HUMAN	sp|Q9Y4C8|RBM19_HUMAN	3	sp|Q9Y4C8|RBM19_HUMAN Probable RNA-binding protein 19 OS=Homo sapiens GN=RBM19 PE=1 SV=3	-7.91943	-4.45671	sp|Q9Y4C8|RBM19_HUMAN	3.46272	1.89941	5.02603	-5.8418	5.1619	0.00103526	0.00437853	-0.315116	3	NA	25950	NA	187900	462480	694200	NA	141600	NA	-7.97143	NA	-7.86743	-3.83913	-4.2398	NA	-5.29121	-7.91943	-4.45671	3.46272	0.00103526	0.00437853
1559	sp|Q7Z7K6|CENPV_HUMAN	sp|Q7Z7K6|CENPV_HUMAN	8	sp|Q7Z7K6|CENPV_HUMAN Centromere protein V OS=Homo sapiens GN=CENPV PE=1 SV=1	-0.59564	2.86595	sp|Q7Z7K6|CENPV_HUMAN	3.46159	1.88331	5.03987	1.13515	4.85289	0.000573965	0.00282788	-0.0252354	0	1744300	2013700	11576000	11243000	89633000	180530000	34472000	64385000	-0.675708	-1.5983	1.29436	-1.40291	3.25739	3.60489	1.52202	3.07949	-0.59564	2.86595	3.46159	0.000573965	0.00282788
1585	sp|Q86WJ1|CHD1L_HUMAN	sp|Q86WJ1|CHD1L_HUMAN	16	sp|Q86WJ1|CHD1L_HUMAN Chromodomain-helicase-DNA-binding protein 1-like OS=Homo sapiens GN=CHD1L PE=1 SV=2	-2.19859	1.24964	sp|Q86WJ1|CHD1L_HUMAN	3.44823	1.92005	4.9764	-0.474472	4.99266	0.000462697	0.00243742	0.188534	0	876410	703550	2503600	4325800	5562500	51193000	36104000	30852000	-1.69843	-3.13842	-1.04549	-2.912	-0.487911	1.82701	1.58628	2.0732	-2.19859	1.24964	3.44823	0.000462697	0.00243742
217	sp|O60884|DNJA2_HUMAN	sp|O60884|DNJA2_HUMAN	9	sp|O60884|DNJA2_HUMAN DnaJ homolog subfamily A member 2 OS=Homo sapiens GN=DNAJA2 PE=1 SV=1	-1.70389	1.73035	sp|O60884|DNJA2_HUMAN	3.43424	2.4799	4.38858	0.0132266	7.96224	8.8764e-06	0.000180754	4.03411	0	833050	1913100	1454600	10619000	17456000	41679000	50596000	35793000	-1.77383	-1.67336	-1.87525	-1.49313	1.05301	1.53696	2.05502	2.27639	-1.70389	1.73035	3.43424	8.8764e-06	0.000180754
144	sp|O15379|HDAC3_HUMAN	sp|O15379|HDAC3_HUMAN	5	sp|O15379|HDAC3_HUMAN Histone deacetylase 3 OS=Homo sapiens GN=HDAC3 PE=1 SV=2	-4.78675	-1.37594	sp|O15379|HDAC3_HUMAN	3.41081	1.57898	5.24264	-2.0581	4.33921	0.00284873	0.00960297	-1.24882	3	NA	NA	NA	1320500	4848600	4829900	2939600	2382500	NA	NA	NA	-4.78675	-0.672985	-1.50331	-1.89755	-1.42992	-4.78675	-1.37594	3.41081	0.00284873	0.00960297
2363	sp|Q9P2I0|CPSF2_HUMAN	sp|Q9P2I0|CPSF2_HUMAN	15	sp|Q9P2I0|CPSF2_HUMAN Cleavage and polyadenylation specificity factor subunit 2 OS=Homo sapiens GN=CPSF2 PE=1 SV=2	-1.60084	1.80095	sp|Q9P2I0|CPSF2_HUMAN	3.40179	1.43975	5.36383	0.100054	3.83626	0.00298297	0.00994324	-1.66144	0	384250	611530	3154600	38853000	79760000	46275000	45475000	9856000	-2.92364	-3.34372	-0.692291	0.55629	3.10014	1.68453	1.9068	0.51232	-1.60084	1.80095	3.40179	0.00298297	0.00994324
382	sp|P06400|RB_HUMAN	sp|P06400|RB_HUMAN	5	sp|P06400|RB_HUMAN Retinoblastoma-associated protein OS=Homo sapiens GN=RB1 PE=1 SV=2	NA	-1.89859	sp|P06400|RB_HUMAN	NA	NA	NA	-1.89859	NA	NA	NA	NA	4	NA	NA	NA	NA	3240800	7557900	1222100	1180700	NA	NA	NA	NA	-1.21581	-0.871652	-3.11668	-2.39021	-5.2973	-1.89859	3.39871	0	0
1150	sp|Q13472|TOP3A_HUMAN	sp|Q13472|TOP3A_HUMAN	5	sp|Q13472|TOP3A_HUMAN DNA topoisomerase 3-alpha OS=Homo sapiens GN=TOP3A PE=1 SV=1	NA	-1.90872	sp|Q13472|TOP3A_HUMAN	NA	NA	NA	-1.90872	NA	NA	NA	NA	4	NA	NA	NA	NA	1506500	3867800	3374500	1734200	NA	NA	NA	NA	-2.24795	-1.81668	-1.7059	-1.86435	-5.2973	-1.90872	3.38858	0	0
1884	sp|Q96F45|ZN503_HUMAN	sp|Q96F45|ZN503_HUMAN	6	sp|Q96F45|ZN503_HUMAN Zinc finger protein 503 OS=Homo sapiens GN=ZNF503 PE=1 SV=1	-1.75832	1.61739	sp|Q96F45|ZN503_HUMAN	3.37571	2.18731	4.56411	0.170655	6.37031	0.00010012	0.000829062	1.77203	1	NA	2730800	895600	10530000	19489000	62829000	31683000	24312000	NA	-1.15217	-2.61637	-1.50643	1.20145	2.11594	1.40484	1.74733	-1.75832	1.61739	3.37571	0.00010012	0.000829062
1357	sp|Q3ZCM7|TBB8_HUMAN	sp|Q3ZCM7|TBB8_HUMAN	11	sp|Q3ZCM7|TBB8_HUMAN Tubulin beta-8 chain OS=Homo sapiens GN=TUBB8 PE=1 SV=2	-2.27513	1.10026	sp|Q3ZCM7|TBB8_HUMAN	3.37539	0.829457	5.92133	-0.346337	2.97326	0.0146677	0.0356495	-3.12556	1	NA	174000	1419500	32449000	13412000	71190000	33191000	6493300	NA	-5.18454	-1.91257	0.271716	0.697927	2.29218	1.46942	-0.058494	-2.27513	1.10026	3.37539	0.0146677	0.0356495
1040	sp|Q03164|KMT2A_HUMAN	sp|Q03164|KMT2A_HUMAN	44	sp|Q03164|KMT2A_HUMAN Histone-lysine N-methyltransferase 2A OS=Homo sapiens GN=KMT2A PE=1 SV=5	-0.469225	2.90023	sp|Q03164|KMT2A_HUMAN	3.36946	1.91221	4.82671	1.21551	5.11604	0.000383427	0.00213417	0.374796	0	570790	6227400	3676600	47143000	107580000	105560000	93216000	37661000	-2.33562	0.0551645	-0.458297	0.861853	3.5033	2.84789	2.90377	2.34598	-0.469225	2.90023	3.36946	0.000383427	0.00213417
1938	sp|Q96PU8|QKI_HUMAN	sp|Q96PU8|QKI_HUMAN	8	sp|Q96PU8|QKI_HUMAN Protein quaking OS=Homo sapiens GN=QKI PE=1 SV=1	-1.90884	1.45812	sp|Q96PU8|QKI_HUMAN	3.36695	1.50334	5.23056	-0.22536	3.99752	0.00227635	0.00798244	-1.39341	0	123770	2106300	1912900	26653000	13974000	46456000	30531000	30020000	-4.607	-1.53246	-1.45672	-0.0391678	0.753235	1.69003	1.35339	2.0358	-1.90884	1.45812	3.36695	0.00227635	0.00798244
1475	sp|Q6P2C8|MED27_HUMAN	sp|Q6P2C8|MED27_HUMAN	3	sp|Q6P2C8|MED27_HUMAN Mediator of RNA polymerase II transcription subunit 27 OS=Homo sapiens GN=MED27 PE=1 SV=1	NA	-1.9447	sp|Q6P2C8|MED27_HUMAN	NA	NA	NA	-1.9447	NA	NA	NA	NA	4	NA	NA	NA	NA	3212400	2145000	2478900	1860100	NA	NA	NA	NA	-1.22767	-2.64835	-2.13431	-1.76849	-5.2973	-1.9447	3.35259	0	0
767	sp|P49916|DNLI3_HUMAN	sp|P49916|DNLI3_HUMAN	32	sp|P49916|DNLI3_HUMAN DNA ligase 3 OS=Homo sapiens GN=LIG3 PE=1 SV=2	-0.529143	2.80569	sp|P49916|DNLI3_HUMAN	3.33483	2.0537	4.61596	1.13827	5.75958	0.000149027	0.00111298	1.30821	0	1096400	2815500	5824000	29327000	27305000	185240000	91837000	62674000	-1.36566	-1.10743	0.244633	0.111886	1.65581	3.64122	2.88307	3.04265	-0.529143	2.80569	3.33483	0.000149027	0.00111298
1115	sp|Q13085|ACACA_HUMAN	sp|Q13085|ACACA_HUMAN	145	sp|Q13085|ACACA_HUMAN Acetyl-CoA carboxylase 1 OS=Homo sapiens GN=ACACA PE=1 SV=2	4.56653	7.89944	sp|Q13085|ACACA_HUMAN	3.33291	1.84208	4.82375	6.23299	4.94657	0.000496622	0.00257024	0.118363	0	53611000	86143000	103380000	786840000	10087000000	4245800000	2758900000	681840000	4.41419	3.90264	4.64013	5.30916	9.62147	8.05954	7.60928	6.30748	4.56653	7.89944	3.33291	0.000496622	0.00257024
851	sp|P55316|FOXG1_HUMAN	sp|P55316|FOXG1_HUMAN	3	sp|P55316|FOXG1_HUMAN Forkhead box protein G1 OS=Homo sapiens GN=FOXG1 PE=1 SV=2	-4.95556	-1.62481	sp|P55316|FOXG1_HUMAN	3.33074	1.50286	5.15862	-3.29018	4.15579	0.00275724	0.00932247	-1.37883	2	69311	NA	310590	1040400	NA	1305400	6436200	4013800	-5.46858	NA	-4.23467	-5.16342	NA	-3.34894	-0.809026	-0.716471	-4.95556	-1.62481	3.33074	0.00275724	0.00932247
469	sp|P15923|TFE2_HUMAN	sp|P15923|TFE2_HUMAN	6	sp|P15923|TFE2_HUMAN Transcription factor E2-alpha OS=Homo sapiens GN=TCF3 PE=1 SV=1	-4.22742	-0.899427	sp|P15923|TFE2_HUMAN	3.328	1.31609	5.3399	-2.56342	3.77255	0.00483086	0.0145063	-1.93292	2	NA	166010	520090	2197600	1171900	NA	18601000	3840000	NA	-5.25339	-3.44689	-3.98199	-2.58636	NA	0.665099	-0.77702	-4.22742	-0.899427	3.328	0.00483086	0.0145063
1878	sp|Q96EU6|RRP36_HUMAN	sp|Q96EU6|RRP36_HUMAN	6	sp|Q96EU6|RRP36_HUMAN Ribosomal RNA processing protein 36 homolog OS=Homo sapiens GN=RRP36 PE=1 SV=1	-3.72435	-0.399049	sp|Q96EU6|RRP36_HUMAN	3.3253	2.1377	4.51289	-1.50748	6.38588	0.000159795	0.00116394	1.37893	2	NA	495250	NA	2472000	5743400	12727000	8859400	4214500	NA	-3.6526	NA	-3.79609	-0.444789	-0.136497	-0.365181	-0.64973	-3.72435	-0.399049	3.3253	0.000159795	0.00116394
1867	sp|Q96DT7|ZBT10_HUMAN	sp|Q96DT7|ZBT10_HUMAN	7	sp|Q96DT7|ZBT10_HUMAN Zinc finger and BTB domain-containing protein 10 OS=Homo sapiens GN=ZBTB10 PE=1 SV=2	-3.8511	-0.52633	sp|Q96DT7|ZBT10_HUMAN	3.32477	1.86313	4.78642	-1.63459	5.18777	0.00067691	0.00315713	0.0124833	2	NA	395290	NA	2594900	12419000	7533000	6486100	3203300	NA	-3.98277	NA	-3.71943	0.594283	-0.876308	-0.798299	-1.025	-3.8511	-0.52633	3.32477	0.00067691	0.00315713
1399	sp|Q5RL73|RBM48_HUMAN	sp|Q5RL73|RBM48_HUMAN	8	sp|Q5RL73|RBM48_HUMAN RNA-binding protein 48 OS=Homo sapiens GN=RBM48 PE=2 SV=1	-3.28893	0.0306538	sp|Q5RL73|RBM48_HUMAN	3.31959	1.75937	4.8798	-1.07587	4.85243	0.00105039	0.00441091	-0.411557	2	NA	653770	NA	3316100	3289600	13407000	19146000	11110000	NA	-3.2459	NA	-3.33196	-1.19567	-0.0630689	0.705212	0.67614	-3.28893	0.0306538	3.31959	0.00105039	0.00441091
1089	sp|Q12830|BPTF_HUMAN	sp|Q12830|BPTF_HUMAN	13	sp|Q12830|BPTF_HUMAN Nucleosome-remodeling factor subunit BPTF OS=Homo sapiens GN=BPTF PE=1 SV=3	-3.87849	-0.562123	sp|Q12830|BPTF_HUMAN	3.31637	2.03535	4.59738	-1.98342	5.80584	0.000205496	0.00135846	1.07663	1	NA	510290	327890	2351800	3775400	5042800	17040000	5288200	NA	-3.60878	-4.15184	-3.87485	-1.01008	-1.44246	0.54335	-0.339303	-3.87849	-0.562123	3.31637	0.000205496	0.00135846
2453	sp|Q9ULX6|AKP8L_HUMAN	sp|Q9ULX6|AKP8L_HUMAN	8	sp|Q9ULX6|AKP8L_HUMAN A-kinase anchor protein 8-like OS=Homo sapiens GN=AKAP8L PE=1 SV=3	-4.37115	-1.05708	sp|Q9ULX6|AKP8L_HUMAN	3.31407	0.775916	5.85222	-2.16177	2.97786	0.0164085	0.0393138	-3.09529	2	54836	NA	731510	NA	16722000	7817800	2801400	1142600	-5.81666	NA	-2.92563	NA	0.995127	-0.823957	-1.96443	-2.43507	-4.37115	-1.05708	3.31407	0.0164085	0.0393138
138	sp|O15265|ATX7_HUMAN	sp|O15265|ATX7_HUMAN	5	sp|O15265|ATX7_HUMAN Ataxin-7 OS=Homo sapiens GN=ATXN7 PE=1 SV=1	-5.17635	-1.86528	sp|O15265|ATX7_HUMAN	3.31107	0.88513	5.737	-2.5275	3.18073	0.0140137	0.0344503	-2.7396	3	NA	NA	167710	NA	3913200	7297200	1245000	1099800	NA	NA	-5.17635	NA	-0.961776	-0.921171	-3.0909	-2.48729	-5.17635	-1.86528	3.31107	0.0140137	0.0344503
1230	sp|Q14865|ARI5B_HUMAN	sp|Q14865|ARI5B_HUMAN	4	sp|Q14865|ARI5B_HUMAN AT-rich interactive domain-containing protein 5B OS=Homo sapiens GN=ARID5B PE=1 SV=3	NA	-1.99326	sp|Q14865|ARI5B_HUMAN	NA	NA	NA	-1.99326	NA	NA	NA	NA	4	NA	NA	NA	NA	1842000	5022800	2606500	1103000	NA	NA	NA	NA	-1.97704	-1.44807	-2.0646	-2.48332	-5.2973	-1.99326	3.30404	0	0
2184	sp|Q9H944|MED20_HUMAN	sp|Q9H944|MED20_HUMAN	4	sp|Q9H944|MED20_HUMAN Mediator of RNA polymerase II transcription subunit 20 OS=Homo sapiens GN=MED20 PE=1 SV=1	-3.73397	-0.430261	sp|Q9H944|MED20_HUMAN	3.30371	1.84068	4.76674	-1.5315	5.15001	0.00071067	0.00326936	-0.0343338	2	241580	NA	NA	2382000	9712100	15271000	4414300	3854600	-3.61325	NA	NA	-3.85469	0.263021	0.120573	-1.33281	-0.771829	-3.73397	-0.430261	3.30371	0.00071067	0.00326936
1366	sp|Q52LA3|LIN52_HUMAN	sp|Q52LA3|LIN52_HUMAN	2	sp|Q52LA3|LIN52_HUMAN Protein lin-52 homolog OS=Homo sapiens GN=LIN52 PE=1 SV=1	NA	-1.99587	sp|Q52LA3|LIN52_HUMAN	NA	NA	NA	-1.99587	NA	NA	NA	NA	4	NA	NA	NA	NA	3021800	3764900	4876900	478970	NA	NA	NA	NA	-1.31008	-1.85472	-1.19438	-3.62431	-5.2973	-1.99587	3.30143	0	0
198	sp|O60341|KDM1A_HUMAN	sp|O60341|KDM1A_HUMAN	31	sp|O60341|KDM1A_HUMAN Lysine-specific histone demethylase 1A OS=Homo sapiens GN=KDM1A PE=1 SV=2	0.0582634	3.35344	sp|O60341|KDM1A_HUMAN	3.29518	2.11833	4.47203	1.70585	6.19534	8.12098e-05	0.000716373	1.90387	0	2273200	5028300	4369000	50417000	169350000	193760000	127780000	35176000	-0.282182	-0.258072	-0.194628	0.967935	4.11465	3.70466	3.34186	2.2526	0.0582634	3.35344	3.29518	8.12098e-05	0.000716373
1073	sp|Q08945|SSRP1_HUMAN	sp|Q08945|SSRP1_HUMAN	28	sp|Q08945|SSRP1_HUMAN FACT complex subunit SSRP1 OS=Homo sapiens GN=SSRP1 PE=1 SV=1	1.46525	4.75673	sp|Q08945|SSRP1_HUMAN	3.29148	2.18305	4.39991	3.11099	6.57039	4.91538e-05	0.000515135	2.39338	0	5241500	26430000	18580000	42882000	254500000	659400000	247160000	206390000	0.95919	2.17225	2.01739	0.712179	4.66349	5.43234	4.25822	4.67287	1.46525	4.75673	3.29148	4.91538e-05	0.000515135
1828	sp|Q969G3|SMCE1_HUMAN	sp|Q969G3|SMCE1_HUMAN	14	sp|Q969G3|SMCE1_HUMAN SWI/SNF-related matrix-associated actin-dependent regulator of chromatin subfamily E member 1 OS=Homo sapiens GN=SMARCE1 PE=1 SV=2	-1.13966	2.14898	sp|Q969G3|SMCE1_HUMAN	3.28864	2.1819	4.39538	0.504663	6.57475	4.88732e-05	0.000515135	2.39895	0	968170	3141100	1636900	21670000	69493000	78738000	37562000	21923000	-1.55048	-0.947161	-1.69482	-0.366175	2.91448	2.43434	1.64127	1.60585	-1.13966	2.14898	3.28864	4.88732e-05	0.000515135
643	sp|P35869|AHR_HUMAN	sp|P35869|AHR_HUMAN	6	sp|P35869|AHR_HUMAN Aryl hydrocarbon receptor OS=Homo sapiens GN=AHR PE=1 SV=2	NA	-2.01824	sp|P35869|AHR_HUMAN	NA	NA	NA	-2.01824	NA	NA	NA	NA	4	NA	NA	NA	NA	2522000	8846800	3866800	281150	NA	NA	NA	NA	-1.55369	-0.649522	-1.51674	-4.35303	-5.2973	-2.01824	3.27905	0	0
2549	sp|Q9Y4A5|TRRAP_HUMAN	sp|Q9Y4A5|TRRAP_HUMAN	9	sp|Q9Y4A5|TRRAP_HUMAN Transformation/transcription domain-associated protein OS=Homo sapiens GN=TRRAP PE=1 SV=3	-6.30407	-3.0266	sp|Q9Y4A5|TRRAP_HUMAN	3.27747	-0.249944	6.80488	-3.68209	2.16531	0.0642976	0.116189	-4.16401	3	NA	NA	NA	505430	6317500	524480	1182900	365880	NA	NA	NA	-6.30407	-0.316421	-4.63529	-3.16197	-3.99271	-6.30407	-3.0266	3.27747	0.0642976	0.116189
2349	sp|Q9P035|HACD3_HUMAN	sp|Q9P035|HACD3_HUMAN	3	sp|Q9P035|HACD3_HUMAN Very-long-chain (3R)-3-hydroxyacyl-CoA dehydratase 3 OS=Homo sapiens GN=HACD3 PE=1 SV=2	-6.18983	-2.91444	sp|Q9P035|HACD3_HUMAN	3.27539	0.522612	6.02816	-4.2246	2.77287	0.0256039	0.0556402	-3.43549	3	NA	155150	NA	319810	310220	NA	7536600	428580	NA	-5.35247	NA	-7.02718	-4.37717	NA	-0.589795	-3.77636	-6.18983	-2.91444	3.27539	0.0256039	0.0556402
1856	sp|Q96C92|SDCG3_HUMAN	sp|Q96C92|SDCG3_HUMAN	9	sp|Q96C92|SDCG3_HUMAN Serologically defined colon cancer antigen 3 OS=Homo sapiens GN=SDCCAG3 PE=1 SV=3	-2.93613	0.314495	sp|Q96C92|SDCG3_HUMAN	3.25063	1.85923	4.64203	-0.769048	5.32813	0.000565882	0.00279975	0.184462	2	NA	610530	NA	5522400	8714900	24290000	19967000	5066500	NA	-3.34612	NA	-2.52615	0.117048	0.775286	0.763532	-0.397884	-2.93613	0.314495	3.25063	0.000565882	0.00279975
2305	sp|Q9NWH9|SLTM_HUMAN	sp|Q9NWH9|SLTM_HUMAN	12	sp|Q9NWH9|SLTM_HUMAN SAFB-like transcription modulator OS=Homo sapiens GN=SLTM PE=1 SV=2	-1.48518	1.75695	sp|Q9NWH9|SLTM_HUMAN	3.24213	1.68756	4.7967	0.135887	4.61454	0.00083417	0.00370742	-0.396439	0	528580	759530	6736000	15151000	29219000	53735000	36523000	24955000	-2.44978	-3.0263	0.466941	-0.93158	1.7471	1.89537	1.6023	1.78304	-1.48518	1.75695	3.24213	0.00083417	0.00370742
1055	sp|Q05BQ5|MBTD1_HUMAN	sp|Q05BQ5|MBTD1_HUMAN	4	sp|Q05BQ5|MBTD1_HUMAN MBT domain-containing protein 1 OS=Homo sapiens GN=MBTD1 PE=1 SV=2	NA	-2.06295	sp|Q05BQ5|MBTD1_HUMAN	NA	NA	NA	-2.06295	NA	NA	NA	NA	4	NA	NA	NA	NA	1562100	2004800	4469300	1578100	NA	NA	NA	NA	-2.19911	-2.7437	-1.31561	-1.99338	-5.2973	-2.06295	3.23435	0	0
2099	sp|Q9C0J8|WDR33_HUMAN	sp|Q9C0J8|WDR33_HUMAN	26	sp|Q9C0J8|WDR33_HUMAN pre-mRNA 3 end processing protein WDR33 OS=Homo sapiens GN=WDR33 PE=1 SV=2	-0.38992	2.83568	sp|Q9C0J8|WDR33_HUMAN	3.2256	1.86321	4.588	1.22288	5.23863	0.000318812	0.00186237	0.557539	0	829760	4539800	3545200	56278000	105410000	89822000	96313000	36352000	-1.77971	-0.407749	-0.51391	1.14169	3.47584	2.62013	2.94917	2.29759	-0.38992	2.83568	3.2256	0.000318812	0.00186237
312	sp|O95400|CD2B2_HUMAN	sp|O95400|CD2B2_HUMAN	2	sp|O95400|CD2B2_HUMAN CD2 antigen cytoplasmic tail-binding protein 2 OS=Homo sapiens GN=CD2BP2 PE=1 SV=1	-6.2365	-3.0112	sp|O95400|CD2B2_HUMAN	3.22529	0.0360943	6.41449	-4.0863	2.30647	0.0479732	0.0920461	-4.12432	2	NA	125710	NA	366390	3463100	3586000	2174900	51339	NA	-5.66064	NA	-6.81235	-1.12641	-1.9234	-2.31604	-6.67896	-6.2365	-3.0112	3.22529	0.0479732	0.0920461
743	sp|P49336|CDK8_HUMAN	sp|P49336|CDK8_HUMAN	9	sp|P49336|CDK8_HUMAN Cyclin-dependent kinase 8 OS=Homo sapiens GN=CDK8 PE=1 SV=1	-3.85698	-0.634163	sp|P49336|CDK8_HUMAN	3.22282	1.64462	4.80102	-1.92329	4.75896	0.00167894	0.00627254	-0.778137	3	NA	565900	306150	NA	NA	10575000	4246200	6217100	NA	-3.45729	-4.25667	NA	NA	-0.397803	-1.38674	-0.11795	-3.85698	-0.634163	3.22282	0.00167894	0.00627254
2352	sp|Q9P0M6|H2AW_HUMAN	sp|Q9P0M6|H2AW_HUMAN	15	sp|Q9P0M6|H2AW_HUMAN Core histone macro-H2A.2 OS=Homo sapiens GN=H2AFY2 PE=1 SV=3	0.108798	3.33047	sp|Q9P0M6|H2AW_HUMAN	3.22168	1.78274	4.66061	1.71964	4.95393	0.000491031	0.0025525	0.129592	0	2755900	9878400	11833000	9752800	103730000	222160000	68941000	86625000	0.00394124	0.730902	1.32792	-1.62757	3.4542	3.89761	2.48475	3.48534	0.108798	3.33047	3.22168	0.000491031	0.0025525
2431	sp|Q9UKV8|AGO2_HUMAN	sp|Q9UKV8|AGO2_HUMAN	23	sp|Q9UKV8|AGO2_HUMAN Protein argonaute-2 OS=Homo sapiens GN=AGO2 PE=1 SV=3	-0.473823	2.7324	sp|Q9UKV8|AGO2_HUMAN	3.20622	2.25754	4.15489	1.12929	7.47798	1.56935e-05	0.000243977	3.49333	0	2033200	3349000	3611800	25508000	38938000	125170000	108820000	44969000	-0.447979	-0.853299	-0.48547	-0.108543	2.134	3.08826	3.11876	2.58856	-0.473823	2.7324	3.20622	1.56935e-05	0.000243977
484	sp|P17482|HXB9_HUMAN	sp|P17482|HXB9_HUMAN	10	sp|P17482|HXB9_HUMAN Homeobox protein Hox-B9 OS=Homo sapiens GN=HOXB9 PE=1 SV=2	-1.18725	2.01583	sp|P17482|HXB9_HUMAN	3.20309	1.96665	4.43952	0.41429	5.732	0.000154999	0.00113602	1.26954	0	1018300	2519200	1642300	22405000	18209000	51301000	42886000	75541000	-1.47546	-1.27029	-1.68979	-0.313475	1.10991	1.82998	1.82538	3.29806	-1.18725	2.01583	3.20309	0.000154999	0.00113602
440	sp|P12004|PCNA_HUMAN	sp|P12004|PCNA_HUMAN	8	sp|P12004|PCNA_HUMAN Proliferating cell nuclear antigen OS=Homo sapiens GN=PCNA PE=1 SV=1	-2.41119	0.786583	sp|P12004|PCNA_HUMAN	3.19777	1.8515	4.54404	-0.812302	5.25561	0.000310815	0.00182513	0.582682	0	321990	1016300	3360900	3463700	14170000	31694000	18875000	10045000	-3.18631	-2.59978	-0.59549	-3.26316	0.772003	1.15062	0.685411	0.538302	-2.41119	0.786583	3.19777	0.000310815	0.00182513
1973	sp|Q99081|HTF4_HUMAN	sp|Q99081|HTF4_HUMAN	6	sp|Q99081|HTF4_HUMAN Transcription factor 12 OS=Homo sapiens GN=TCF12 PE=1 SV=1	-3.64452	-0.456229	sp|Q99081|HTF4_HUMAN	3.18829	0.94276	5.43382	-1.2533	3.40529	0.0125921	0.0314136	-2.55843	4	NA	NA	NA	2720900	2863300	12322000	NA	7821700	NA	NA	NA	-3.64452	-1.38267	-0.182118	NA	0.196104	-3.64452	-0.456229	3.18829	0.0125921	0.0314136
310	sp|O95373|IPO7_HUMAN	sp|O95373|IPO7_HUMAN	23	sp|O95373|IPO7_HUMAN Importin-7 OS=Homo sapiens GN=IPO7 PE=1 SV=1	-2.9639	0.210458	sp|O95373|IPO7_HUMAN	3.17436	1.04714	5.30159	-1.37672	3.30181	0.00745162	0.0204639	-2.56506	0	82870	1095100	476330	18916000	25839000	21819000	13453000	2137100	-5.20309	-2.49041	-3.58119	-0.580923	1.58146	0.623942	0.215041	-1.57861	-2.9639	0.210458	3.17436	0.00745162	0.0204639
1466	sp|Q6NUN9|ZN746_HUMAN	sp|Q6NUN9|ZN746_HUMAN	6	sp|Q6NUN9|ZN746_HUMAN Zinc finger protein 746 OS=Homo sapiens GN=ZNF746 PE=1 SV=1	NA	-2.13116	sp|Q6NUN9|ZN746_HUMAN	NA	NA	NA	-2.13116	NA	NA	NA	NA	4	NA	NA	NA	NA	4449800	13501000	5147100	55868	NA	NA	NA	NA	-0.788632	-0.0532127	-1.11948	-6.56332	-5.2973	-2.13116	3.16614	0	0
435	sp|P11388|TOP2A_HUMAN	sp|P11388|TOP2A_HUMAN	63	sp|P11388|TOP2A_HUMAN DNA topoisomerase 2-alpha OS=Homo sapiens GN=TOP2A PE=1 SV=3	2.2678	5.42767	sp|P11388|TOP2A_HUMAN	3.15988	2.1721	4.14765	3.84773	7.07817	2.56327e-05	0.000335185	3.02313	0	11298000	28347000	37043000	76378000	422480000	811140000	472380000	372850000	2.10041	2.2748	3.07178	1.62419	5.3464	5.72451	5.15795	5.48183	2.2678	5.42767	3.15988	2.56327e-05	0.000335185
2475	sp|Q9UPR3|SMG5_HUMAN	sp|Q9UPR3|SMG5_HUMAN	8	sp|Q9UPR3|SMG5_HUMAN Protein SMG5 OS=Homo sapiens GN=SMG5 PE=1 SV=3	-3.81086	-0.673942	sp|Q9UPR3|SMG5_HUMAN	3.13692	1.75603	4.51782	-2.2424	5.02635	0.00043946	0.00236247	0.239622	0	82038	729720	300820	5083700	2869400	15259000	5970200	4627000	-5.21808	-3.08494	-4.28351	-2.65693	-1.37981	0.119464	-0.913422	-0.522004	-3.81086	-0.673942	3.13692	0.00043946	0.00236247
343	sp|O95983|MBD3_HUMAN	sp|O95983|MBD3_HUMAN	8	sp|O95983|MBD3_HUMAN Methyl-CpG-binding domain protein 3 OS=Homo sapiens GN=MBD3 PE=1 SV=1	-2.12833	1.00784	sp|O95983|MBD3_HUMAN	3.13617	0.9681	5.30424	-0.33623	3.24401	0.00935081	0.0246569	-2.68511	1	114620	NA	1734500	26345000	22922000	43461000	18594000	8757700	-4.72113	NA	-1.60632	-0.0575319	1.42006	1.59602	0.664577	0.350713	-2.12833	1.00784	3.13617	0.00935081	0.0246569
1461	sp|Q6MZP7|LIN54_HUMAN	sp|Q6MZP7|LIN54_HUMAN	22	sp|Q6MZP7|LIN54_HUMAN Protein lin-54 homolog OS=Homo sapiens GN=LIN54 PE=1 SV=3	0.445722	3.57636	sp|Q6MZP7|LIN54_HUMAN	3.13063	2.06775	4.19352	2.01104	6.5171	5.27294e-05	0.000538707	2.32511	0	2603000	9416000	6939100	42304000	55990000	234030000	246100000	84958000	-0.0808747	0.66069	0.512335	0.690738	2.62337	3.97104	4.25225	3.45876	0.445722	3.57636	3.13063	5.27294e-05	0.000538707
1971	sp|Q96T88|UHRF1_HUMAN	sp|Q96T88|UHRF1_HUMAN	12	sp|Q96T88|UHRF1_HUMAN E3 ubiquitin-protein ligase UHRF1 OS=Homo sapiens GN=UHRF1 PE=1 SV=1	-2.56206	0.567619	sp|Q96T88|UHRF1_HUMAN	3.12968	1.53337	4.72598	-0.997221	4.33803	0.00129993	0.00513014	-0.83714	0	274590	884950	3357700	3124700	9767000	29418000	35123000	4390900	-3.42294	-2.80247	-0.596945	-3.42589	0.270616	1.04549	1.54801	-0.593644	-2.56206	0.567619	3.12968	0.00129993	0.00513014
2491	sp|Q9UQR1|ZN148_HUMAN	sp|Q9UQR1|ZN148_HUMAN	22	sp|Q9UQR1|ZN148_HUMAN Zinc finger protein 148 OS=Homo sapiens GN=ZNF148 PE=1 SV=2	-0.728209	2.39867	sp|Q9UQR1|ZN148_HUMAN	3.12688	1.96439	4.28937	1.05858	6.03226	0.000153229	0.00113128	1.36145	1	NA	2287500	2580500	31528000	47133000	77806000	63680000	39503000	NA	-1.41159	-0.999256	0.226223	2.39135	2.41754	2.37449	2.41129	-0.728209	2.39867	3.12688	0.000153229	0.00113128
1632	sp|Q8IY63|AMOL1_HUMAN	sp|Q8IY63|AMOL1_HUMAN	11	sp|Q8IY63|AMOL1_HUMAN Angiomotin-like protein 1 OS=Homo sapiens GN=AMOTL1 PE=1 SV=1	-5.77031	-2.6508	sp|Q8IY63|AMOL1_HUMAN	3.11951	-0.44903	6.68805	-3.2747	2.0372	0.0781314	0.134887	-4.34169	3	NA	116640	NA	NA	187100	11133000	1737300	1019200	NA	-5.77031	NA	NA	-5.05846	-0.325264	-2.62808	-2.5914	-5.77031	-2.6508	3.11951	0.0781314	0.134887
588	sp|P30044|PRDX5_HUMAN	sp|P30044|PRDX5_HUMAN	7	sp|P30044|PRDX5_HUMAN Peroxiredoxin-5, mitochondrial OS=Homo sapiens GN=PRDX5 PE=1 SV=4	-3.91598	-0.799995	sp|P30044|PRDX5_HUMAN	3.11599	1.62371	4.60827	-2.04639	4.86612	0.00147302	0.00562513	-0.652325	3	163050	NA	459990	NA	2755000	9582600	NA	4954200	-4.19743	NA	-3.63453	NA	-1.43463	-0.536818	NA	-0.428544	-3.91598	-0.799995	3.11599	0.00147302	0.00562513
2472	sp|Q9UPN9|TRI33_HUMAN	sp|Q9UPN9|TRI33_HUMAN	21	sp|Q9UPN9|TRI33_HUMAN E3 ubiquitin-protein ligase TRIM33 OS=Homo sapiens GN=TRIM33 PE=1 SV=3	-1.31186	1.80093	sp|Q9UPN9|TRI33_HUMAN	3.1128	2.06037	4.16522	0.244537	6.54434	5.08678e-05	0.000524227	2.36007	0	1215700	2442700	1830900	12815000	44503000	74970000	42376000	11437000	-1.21218	-1.31545	-1.52367	-1.19614	2.31399	2.36516	1.80877	0.715819	-1.31186	1.80093	3.1128	5.08678e-05	0.000524227
342	sp|O95948|ONEC2_HUMAN;sp|O60422|ONEC3_HUMAN	sp|O95948|ONEC2_HUMAN	3	sp|O95948|ONEC2_HUMAN One cut domain family member 2 OS=Homo sapiens GN=ONECUT2 PE=2 SV=2;sp|O60422|ONEC3_HUMAN One cut domain family member 3 OS=Homo sapiens GN=ONECUT3 PE=3 SV=2	NA	-2.19533	sp|O95948|ONEC2_HUMAN	NA	NA	NA	-2.19533	NA	NA	NA	NA	4	NA	NA	NA	NA	733760	2657100	1248400	6159600	NA	NA	NA	NA	-3.2172	-2.34633	-3.08711	-0.13066	-5.2973	-2.19533	3.10197	0	0
983	sp|P78406|RAE1L_HUMAN	sp|P78406|RAE1L_HUMAN	18	sp|P78406|RAE1L_HUMAN mRNA export factor OS=Homo sapiens GN=RAE1 PE=1 SV=1	1.19338	4.29413	sp|P78406|RAE1L_HUMAN	3.10076	1.88918	4.31233	2.74376	5.66274	0.000171158	0.00120938	1.17187	0	4596600	9172800	8828700	133520000	141060000	310920000	182420000	282040000	0.764102	0.622366	0.880358	2.50669	3.86838	4.37179	3.83635	5.10002	1.19338	4.29413	3.10076	0.000171158	0.00120938
283	sp|O94762|RECQ5_HUMAN	sp|O94762|RECQ5_HUMAN	7	sp|O94762|RECQ5_HUMAN ATP-dependent DNA helicase Q5 OS=Homo sapiens GN=RECQL5 PE=1 SV=2	-3.93769	-0.840933	sp|O94762|RECQ5_HUMAN	3.09675	0.586104	5.6074	-1.46028	2.87448	0.0219991	0.0495297	-3.16468	3	NA	NA	NA	2260100	2945200	3007100	16480000	5269200	NA	NA	NA	-3.93769	-1.34467	-2.17177	0.496935	-0.344226	-3.93769	-0.840933	3.09675	0.0219991	0.0495297
2189	sp|Q9H9G7|AGO3_HUMAN	sp|Q9H9G7|AGO3_HUMAN	16	sp|Q9H9G7|AGO3_HUMAN Protein argonaute-3 OS=Homo sapiens GN=AGO3 PE=1 SV=2	-3.20302	-0.126136	sp|Q9H9G7|AGO3_HUMAN	3.07689	2.1107	4.04308	-1.66458	7.04624	2.66788e-05	0.000340335	2.98463	0	311950	537800	773300	3591100	6779900	22159000	8014000	4968600	-3.23338	-3.53188	-2.84074	-3.20609	-0.221243	0.645755	-0.504483	-0.424574	-3.20302	-0.126136	3.07689	2.66788e-05	0.000340335
862	sp|P56545|CTBP2_HUMAN	sp|P56545|CTBP2_HUMAN	6	sp|P56545|CTBP2_HUMAN C-terminal-binding protein 2 OS=Homo sapiens GN=CTBP2 PE=1 SV=1	-3.24102	-0.164635	sp|P56545|CTBP2_HUMAN	3.07639	1.77001	4.38277	-1.70283	5.21051	0.000332535	0.0019141	0.515826	0	349920	628810	434530	4422900	2388900	9607700	22401000	10341000	-3.06271	-3.30291	-3.72155	-2.87693	-1.62674	-0.533127	0.923303	0.578026	-3.24102	-0.164635	3.07639	0.000332535	0.0019141
855	sp|P55795|HNRH2_HUMAN	sp|P55795|HNRH2_HUMAN	14	sp|P55795|HNRH2_HUMAN Heterogeneous nuclear ribonucleoprotein H2 OS=Homo sapiens GN=HNRNPH2 PE=1 SV=1	-0.518776	2.55647	sp|P55795|HNRH2_HUMAN	3.07524	1.84874	4.30175	1.01885	5.54776	0.000202088	0.00135107	1.00808	0	961740	10945000	2674300	20536000	44336000	87422000	61959000	60687000	-1.56038	0.881066	-0.944695	-0.451096	2.30893	2.58193	2.33644	2.99858	-0.518776	2.55647	3.07524	0.000202088	0.00135107
1805	sp|Q92794|KAT6A_HUMAN	sp|Q92794|KAT6A_HUMAN	9	sp|Q92794|KAT6A_HUMAN Histone acetyltransferase KAT6A OS=Homo sapiens GN=KAT6A PE=1 SV=2	-3.50167	-0.434573	sp|Q92794|KAT6A_HUMAN	3.06709	1.03589	5.09829	-1.45694	3.44377	0.00794055	0.0215895	-2.3872	2	NA	1779300	NA	1001400	6935300	11359000	7740500	4068500	NA	-1.77955	NA	-5.22378	-0.190709	-0.296914	-0.552715	-0.697956	-3.50167	-0.434573	3.06709	0.00794055	0.0215895
1264	sp|Q15291|RBBP5_HUMAN	sp|Q15291|RBBP5_HUMAN	11	sp|Q15291|RBBP5_HUMAN Retinoblastoma-binding protein 5 OS=Homo sapiens GN=RBBP5 PE=1 SV=2	-2.97116	0.0881977	sp|Q15291|RBBP5_HUMAN	3.05936	1.68315	4.43557	-1.44148	4.91876	0.000518354	0.00263079	0.075879	0	311980	1274000	494070	4478200	28610000	6171200	11953000	5607300	-3.23324	-2.2688	-3.52532	-2.8573	1.71872	-1.1576	0.0508327	-0.259159	-2.97116	0.0881977	3.05936	0.000518354	0.00263079
422	sp|P10071|GLI3_HUMAN	sp|P10071|GLI3_HUMAN	4	sp|P10071|GLI3_HUMAN Transcriptional activator GLI3 OS=Homo sapiens GN=GLI3 PE=1 SV=6	NA	-2.23872	sp|P10071|GLI3_HUMAN	NA	NA	NA	-2.23872	NA	NA	NA	NA	4	NA	NA	NA	NA	3016000	571510	5121700	1568500	NA	NA	NA	NA	-1.31267	-4.51414	-1.12635	-2.00172	-5.2973	-2.23872	3.05858	0	0
787	sp|P51398|RT29_HUMAN	sp|P51398|RT29_HUMAN	4	sp|P51398|RT29_HUMAN 28S ribosomal protein S29, mitochondrial OS=Homo sapiens GN=DAP3 PE=1 SV=1	-4.6309	-1.57352	sp|P51398|RT29_HUMAN	3.05738	0.218779	5.89598	-2.88382	2.41547	0.0374342	0.0760937	-4.02824	1	808200	NA	348070	171330	2564100	11825000	3639400	800630	-1.81883	NA	-4.06057	-8.01329	-1.53138	-0.240196	-1.60093	-2.92156	-4.6309	-1.57352	3.05738	0.0374342	0.0760937
24	REV__sp|Q16720|AT2B3_HUMAN	REV__sp|Q16720|AT2B3_HUMAN	2	sp|Q16720|AT2B3_HUMAN Plasma membrane calcium-transporting ATPase 3 OS=Homo sapiens GN=ATP2B3 PE=1 SV=3	-3.2055	-0.181256	REV__sp|Q16720|AT2B3_HUMAN	3.02424	-0.401199	6.44969	-0.786105	2.05749	0.0757596	0.13195	-4.3137	3	NA	NA	609090	NA	49948000	8064200	7182900	1874700	NA	NA	-3.2055	NA	2.46951	-0.780182	-0.656562	-1.7578	-3.2055	-0.181256	3.02424	0.0757596	0.13195
1870	sp|Q96E39|RMXL1_HUMAN	sp|Q96E39|RMXL1_HUMAN	19	sp|Q96E39|RMXL1_HUMAN RNA binding motif protein, X-linked-like-1 OS=Homo sapiens GN=RBMXL1 PE=1 SV=1	-4.42183	-1.40195	sp|Q96E39|RMXL1_HUMAN	3.01988	1.35829	4.68147	-2.6099	4.23549	0.00325939	0.0106392	-1.42072	3	200280	NA	NA	1189500	NA	8740100	4231400	1409800	-3.89184	NA	NA	-4.95182	NA	-0.666639	-1.39159	-2.14763	-4.42183	-1.40195	3.01988	0.00325939	0.0106392
2323	sp|Q9NYH9|UTP6_HUMAN	sp|Q9NYH9|UTP6_HUMAN	11	sp|Q9NYH9|UTP6_HUMAN U3 small nucleolar RNA-associated protein 6 homolog OS=Homo sapiens GN=UTP6 PE=2 SV=2	-2.28523	0.728555	sp|Q9NYH9|UTP6_HUMAN	3.01379	1.58491	4.44267	-0.778339	4.66688	0.000767895	0.00346884	-0.314219	0	314970	1296200	2145600	5992500	20109000	42370000	5740800	14907000	-3.21907	-2.2435	-1.28129	-2.39708	1.24364	1.56016	-0.967846	1.07827	-2.28523	0.728555	3.01379	0.000767895	0.00346884
294	sp|O94925|GLSK_HUMAN	sp|O94925|GLSK_HUMAN	5	sp|O94925|GLSK_HUMAN Glutaminase kidney isoform, mitochondrial OS=Homo sapiens GN=GLS PE=1 SV=1	NA	-2.28812	sp|O94925|GLSK_HUMAN	NA	NA	NA	-2.28812	NA	NA	NA	NA	4	NA	NA	NA	NA	1319000	7916900	595060	1813800	NA	NA	NA	NA	-2.42703	-0.806187	-4.11631	-1.80297	-5.2973	-2.28812	3.00917	0	0
525	sp|P22670|RFX1_HUMAN	sp|P22670|RFX1_HUMAN	7	sp|P22670|RFX1_HUMAN MHC class II regulatory factor RFX1 OS=Homo sapiens GN=RFX1 PE=1 SV=2	-3.95678	-0.950871	sp|P22670|RFX1_HUMAN	3.00591	1.16435	4.84748	-2.45383	3.6116	0.00436848	0.0134415	-2.03891	0	122890	215100	157650	13927000	3878000	8089500	7108800	2466000	-4.61761	-4.87398	-5.27088	-1.06467	-0.973951	-0.775763	-0.670965	-1.3828	-3.95678	-0.950871	3.00591	0.00436848	0.0134415
2515	sp|Q9Y2T2|AP3M1_HUMAN	sp|Q9Y2T2|AP3M1_HUMAN	3	sp|Q9Y2T2|AP3M1_HUMAN AP-3 complex subunit mu-1 OS=Homo sapiens GN=AP3M1 PE=1 SV=1	-6.08452	-3.08703	sp|Q9Y2T2|AP3M1_HUMAN	2.99749	1.2077	4.78729	-4.28603	3.90295	0.00507375	0.0150428	-1.85267	3	NA	NA	93063	577780	319290	2731600	1753200	NA	NA	NA	-6.07635	-6.09269	-4.33834	-2.30732	-2.61543	NA	-6.08452	-3.08703	2.99749	0.00507375	0.0150428
1922	sp|Q96KQ4|ASPP1_HUMAN	sp|Q96KQ4|ASPP1_HUMAN	8	sp|Q96KQ4|ASPP1_HUMAN Apoptosis-stimulating of p53 protein 1 OS=Homo sapiens GN=PPP1R13B PE=1 SV=3	-3.82903	-0.831886	sp|Q96KQ4|ASPP1_HUMAN	2.99714	1.12381	4.87048	-1.43131	3.72847	0.00644182	0.0182286	-2.00812	3	NA	NA	NA	2421000	5009800	12787000	4841200	2499800	NA	NA	NA	-3.82903	-0.628917	-0.129862	-1.20458	-1.36418	-3.82903	-0.831886	2.99714	0.00644182	0.0182286
1773	sp|Q8WYP5|ELYS_HUMAN	sp|Q8WYP5|ELYS_HUMAN	24	sp|Q8WYP5|ELYS_HUMAN Protein ELYS OS=Homo sapiens GN=AHCTF1 PE=1 SV=3	-1.39529	1.59042	sp|Q8WYP5|ELYS_HUMAN	2.98572	0.734389	5.23705	0.0975648	2.9344	0.0141575	0.0346411	-3.19222	0	91630	3456700	4158100	38693000	31134000	41425000	31004000	22248000	-5.05377	-0.806942	-0.270232	0.54977	1.83263	1.52834	1.37475	1.62598	-1.39529	1.59042	2.98572	0.0141575	0.0346411
2495	sp|Q9Y230|RUVB2_HUMAN	sp|Q9Y230|RUVB2_HUMAN	37	sp|Q9Y230|RUVB2_HUMAN RuvB-like 2 OS=Homo sapiens GN=RUVBL2 PE=1 SV=3	3.85622	6.83708	sp|Q9Y230|RUVB2_HUMAN	2.98086	2.01761	3.94411	5.34665	6.84717	3.43319e-05	0.000413296	2.74127	0	30986000	70066000	61763000	434850000	1787200000	2027500000	1598400000	626020000	3.59958	3.60011	3.85299	4.37221	7.28969	7.01687	6.85112	6.19065	3.85622	6.83708	2.98086	3.43319e-05	0.000413296
253	sp|O75528|TADA3_HUMAN	sp|O75528|TADA3_HUMAN	13	sp|O75528|TADA3_HUMAN Transcriptional adapter 3 OS=Homo sapiens GN=TADA3 PE=1 SV=1	-1.61095	1.35221	sp|O75528|TADA3_HUMAN	2.96315	1.95652	3.96979	-0.129371	6.51317	5.30042e-05	0.00053918	2.32005	0	910950	2417700	1223000	11759000	39259000	35714000	20376000	15744000	-1.641	-1.33052	-2.14026	-1.33201	2.14506	1.31908	0.791697	1.15299	-1.61095	1.35221	2.96315	5.30042e-05	0.00053918
1923	sp|Q96KQ7|EHMT2_HUMAN	sp|Q96KQ7|EHMT2_HUMAN	11	sp|Q96KQ7|EHMT2_HUMAN Histone-lysine N-methyltransferase EHMT2 OS=Homo sapiens GN=EHMT2 PE=1 SV=3	-4.5773	-1.62488	sp|Q96KQ7|EHMT2_HUMAN	2.95242	0.659049	5.24579	-2.60902	2.93605	0.0175304	0.0413305	-3.15949	2	NA	170090	NA	2261400	11199000	6095900	1321700	893330	NA	-5.21783	NA	-3.93678	0.454959	-1.17492	-3.00786	-2.77171	-4.5773	-1.62488	2.95242	0.0175304	0.0413305
2106	sp|Q9GZS3|WDR61_HUMAN	sp|Q9GZS3|WDR61_HUMAN	4	sp|Q9GZS3|WDR61_HUMAN WD repeat-containing protein 61 OS=Homo sapiens GN=WDR61 PE=1 SV=1	-4.54792	-1.6032	sp|Q9GZS3|WDR61_HUMAN	2.94473	0.564615	5.32484	-3.2859	2.77462	0.0204637	0.0467968	-3.44899	1	262290	1281500	39123	1125000	1477500	4948900	5347300	NA	-3.49103	-2.2602	-7.40056	-5.0399	-2.27414	-1.46898	-1.06647	NA	-4.54792	-1.6032	2.94473	0.0204637	0.0467968
1674	sp|Q8NAT1|PMGT2_HUMAN	sp|Q8NAT1|PMGT2_HUMAN	15	sp|Q8NAT1|PMGT2_HUMAN Protein O-linked-mannose beta-1,4-N-acetylglucosaminyltransferase 2 OS=Homo sapiens GN=POMGNT2 PE=1 SV=1	-2.76863	0.156881	sp|Q8NAT1|PMGT2_HUMAN	2.92551	1.23029	4.62073	-1.30587	3.81843	0.00307405	0.0101893	-1.69124	0	139060	1937200	677580	7988200	7699800	27718000	28050000	2230900	-4.43392	-1.65503	-3.04266	-1.94291	-0.0498124	0.961521	1.23567	-1.51985	-2.76863	0.156881	2.92551	0.00307405	0.0101893
2013	sp|Q9BQ52|RNZ2_HUMAN	sp|Q9BQ52|RNZ2_HUMAN	5	sp|Q9BQ52|RNZ2_HUMAN Zinc phosphodiesterase ELAC protein 2 OS=Homo sapiens GN=ELAC2 PE=1 SV=2	-5.71659	-2.79205	sp|Q9BQ52|RNZ2_HUMAN	2.92454	1.26182	4.58726	-4.25432	4.21845	0.00458638	0.0139663	-1.63964	4	NA	NA	96626	887670	NA	NA	1655500	819900	NA	NA	-6.01893	-5.41425	NA	NA	-2.69507	-2.88903	-5.71659	-2.79205	2.92454	0.00458638	0.0139663
1926	sp|Q96L91|EP400_HUMAN	sp|Q96L91|EP400_HUMAN	68	sp|Q96L91|EP400_HUMAN E1A-binding protein p400 OS=Homo sapiens GN=EP400 PE=1 SV=4	1.58071	4.49159	sp|Q96L91|EP400_HUMAN	2.91088	1.7817	4.04005	3.03615	5.70389	0.000161351	0.00116937	1.22999	0	5041800	26769000	8823600	120990000	364790000	262910000	284820000	149020000	0.90147	2.19092	0.879475	2.35099	5.14858	4.13519	4.45521	4.22738	1.58071	4.49159	2.91088	0.000161351	0.00116937
366	sp|P05114|HMGN1_HUMAN	sp|P05114|HMGN1_HUMAN	7	sp|P05114|HMGN1_HUMAN Non-histone chromosomal protein HMG-14 OS=Homo sapiens GN=HMGN1 PE=1 SV=3	0.575467	3.48626	sp|P05114|HMGN1_HUMAN	2.91079	-0.0237001	5.84528	2.23878	2.22451	0.0515339	0.0975301	-4.32969	1	1305600	2157500	84383000	NA	36784000	242450000	335670000	69468000	-1.10617	-1.49728	4.32985	NA	2.05732	4.0209	4.68339	3.18343	0.575467	3.48626	2.91079	0.0515339	0.0975301
1211	sp|Q14676|MDC1_HUMAN	sp|Q14676|MDC1_HUMAN	40	sp|Q14676|MDC1_HUMAN Mediator of DNA damage checkpoint protein 1 OS=Homo sapiens GN=MDC1 PE=1 SV=3	1.12447	4.02468	sp|Q14676|MDC1_HUMAN	2.90021	1.94094	3.85949	2.57458	6.68951	4.20691e-05	0.000475039	2.54447	0	5467600	10988000	8224700	86294000	132910000	271040000	165520000	172950000	1.02194	0.886809	0.772067	1.81705	3.78819	4.17815	3.70131	4.43108	1.12447	4.02468	2.90021	4.20691e-05	0.000475039
2188	sp|Q9H9F9|ARP5_HUMAN	sp|Q9H9F9|ARP5_HUMAN	4	sp|Q9H9F9|ARP5_HUMAN Actin-related protein 5 OS=Homo sapiens GN=ACTR5 PE=1 SV=2	-4.59115	-1.6926	sp|Q9H9F9|ARP5_HUMAN	2.89855	1.5451	4.252	-2.65879	4.88426	0.00100678	0.00428881	-0.370502	2	NA	203730	NA	1879800	3149100	2620300	4463600	1775000	NA	-4.95352	NA	-4.22878	-1.25448	-2.366	-1.31738	-1.83255	-4.59115	-1.6926	2.89855	0.00100678	0.00428881
200	sp|O60504|VINEX_HUMAN	sp|O60504|VINEX_HUMAN	2	sp|O60504|VINEX_HUMAN Vinexin OS=Homo sapiens GN=SORBS3 PE=1 SV=2	-3.90761	-1.01251	sp|O60504|VINEX_HUMAN	2.8951	1.18391	4.60629	-2.46006	4.05772	0.00555545	0.0161337	-1.82401	4	241360	NA	317590	NA	4809500	NA	NA	2542300	-3.6146	NA	-4.20061	NA	-0.683894	NA	NA	-1.34112	-3.90761	-1.01251	2.8951	0.00555545	0.0161337
628	sp|P35244|RFA3_HUMAN	sp|P35244|RFA3_HUMAN	7	sp|P35244|RFA3_HUMAN Replication protein A 14 kDa subunit OS=Homo sapiens GN=RPA3 PE=1 SV=1	-1.46873	1.4262	sp|P35244|RFA3_HUMAN	2.89494	1.20625	4.58362	-0.0212638	3.79314	0.00320818	0.010545	-1.73354	0	293400	3064000	1242500	38679000	11633000	45538000	45205000	22448000	-3.32448	-0.983558	-2.11609	0.549198	0.506189	1.66188	1.89853	1.63822	-1.46873	1.4262	2.89494	0.00320818	0.010545
844	sp|P55060|XPO2_HUMAN	sp|P55060|XPO2_HUMAN	2	sp|P55060|XPO2_HUMAN Exportin-2 OS=Homo sapiens GN=CSE1L PE=1 SV=3	-5.34086	-2.45036	sp|P55060|XPO2_HUMAN	2.8905	1.5039	4.27711	-3.68915	4.67494	0.000990787	0.00423597	-0.467104	1	40422	175610	247490	NA	2607000	1574700	2540700	698640	-6.26983	-5.17105	-4.58171	NA	-1.50902	-3.08436	-2.10011	-3.10795	-5.34086	-2.45036	2.8905	0.000990787	0.00423597
967	sp|P67870|CSK2B_HUMAN	sp|P67870|CSK2B_HUMAN	8	sp|P67870|CSK2B_HUMAN Casein kinase II subunit beta OS=Homo sapiens GN=CSNK2B PE=1 SV=1	-0.4158	2.46983	sp|P67870|CSK2B_HUMAN	2.88563	1.42682	4.34445	1.02702	4.37673	0.00122091	0.00491105	-0.774839	0	895580	11576000	1764400	40455000	47170000	62562000	93641000	41142000	-1.66628	0.963157	-1.5802	0.620128	2.39241	2.10993	2.91009	2.4669	-0.4158	2.46983	2.88563	0.00122091	0.00491105
1628	sp|Q8IXT5|RB12B_HUMAN	sp|Q8IXT5|RB12B_HUMAN	5	sp|Q8IXT5|RB12B_HUMAN RNA-binding protein 12B OS=Homo sapiens GN=RBM12B PE=1 SV=2	-4.01818	-1.1399	sp|Q8IXT5|RB12B_HUMAN	2.87828	1.618	4.13856	-2.37345	5.1218	0.000520672	0.00263688	0.167117	1	NA	679920	180820	2458500	2755200	6830200	4108900	4127700	NA	-3.18846	-5.06134	-3.80475	-1.43453	-1.01447	-1.43239	-0.678196	-4.01818	-1.1399	2.87828	0.000520672	0.00263688
589	sp|P30048|PRDX3_HUMAN	sp|P30048|PRDX3_HUMAN	3	sp|P30048|PRDX3_HUMAN Thioredoxin-dependent peroxide reductase, mitochondrial OS=Homo sapiens GN=PRDX3 PE=1 SV=3	-4.35539	-1.47832	sp|P30048|PRDX3_HUMAN	2.87707	1.47796	4.27618	-2.71135	4.61162	0.00108789	0.00452807	-0.559488	1	NA	558840	317450	901860	3610700	6270800	5035400	1044300	NA	-3.47568	-4.20129	-5.38919	-1.07018	-1.13501	-1.14995	-2.55812	-4.35539	-1.47832	2.87707	0.00108789	0.00452807
1877	sp|Q96ES7|SGF29_HUMAN	sp|Q96ES7|SGF29_HUMAN	9	sp|Q96ES7|SGF29_HUMAN SAGA-associated factor 29 OS=Homo sapiens GN=SGF29 PE=1 SV=1	-2.81003	0.0660306	sp|Q96ES7|SGF29_HUMAN	2.87606	1.72083	4.0313	-1.372	5.50854	0.000213961	0.00140263	0.951744	0	344070	1033500	472020	7792600	4919000	10923000	19908000	9842100	-3.08776	-2.5752	-3.59508	-1.98208	-0.653562	-0.352128	0.759422	0.51039	-2.81003	0.0660306	2.87606	0.000213961	0.00140263
2508	sp|Q9Y2P8|RCL1_HUMAN	sp|Q9Y2P8|RCL1_HUMAN	11	sp|Q9Y2P8|RCL1_HUMAN RNA 3-terminal phosphate cyclase-like protein OS=Homo sapiens GN=RCL1 PE=1 SV=3	-1.74904	1.11609	sp|Q9Y2P8|RCL1_HUMAN	2.86513	1.1295	4.60077	-0.316474	3.65254	0.00407342	0.0126824	-1.9698	0	216250	1075300	5696100	15341000	15362000	51907000	18750000	14718000	-3.77784	-2.51713	0.2107	-0.91189	0.880831	1.84655	0.676181	1.06081	-1.74904	1.11609	2.86513	0.00407342	0.0126824
2212	sp|Q9HCJ0|TNR6C_HUMAN	sp|Q9HCJ0|TNR6C_HUMAN	5	sp|Q9HCJ0|TNR6C_HUMAN Trinucleotide repeat-containing gene 6C protein OS=Homo sapiens GN=TNRC6C PE=1 SV=3	-5.28863	-2.4247	sp|Q9HCJ0|TNR6C_HUMAN	2.86393	0.852491	4.87537	-2.99749	3.31813	0.0114879	0.0290895	-2.5522	3	NA	NA	NA	961130	1689700	3853600	2161200	540580	NA	NA	NA	-5.28863	-2.09332	-1.82187	-2.32482	-3.45879	-5.28863	-2.4247	2.86393	0.0114879	0.0290895
2121	sp|Q9H0H5|RGAP1_HUMAN	sp|Q9H0H5|RGAP1_HUMAN	10	sp|Q9H0H5|RGAP1_HUMAN Rac GTPase-activating protein 1 OS=Homo sapiens GN=RACGAP1 PE=1 SV=1	-2.40049	0.460366	sp|Q9H0H5|RGAP1_HUMAN	2.86086	1.27458	4.44713	-0.970062	3.9905	0.00230315	0.00806444	-1.40503	0	218540	913000	685460	26337000	9976400	19941000	17182000	9699400	-3.76219	-2.75676	-3.02499	-0.0580118	0.299198	0.496976	0.554877	0.490412	-2.40049	0.460366	2.86086	0.00230315	0.00806444
1276	sp|Q15424|SAFB1_HUMAN	sp|Q15424|SAFB1_HUMAN	25	sp|Q15424|SAFB1_HUMAN Scaffold attachment factor B1 OS=Homo sapiens GN=SAFB PE=1 SV=4	2.13631	4.99544	sp|Q15424|SAFB1_HUMAN	2.85914	1.77938	3.93889	3.56588	5.85891	0.000129469	0.0010151	1.44657	0	16529000	29649000	24925000	53868000	227630000	557060000	369880000	365880000	2.66579	2.34057	2.46633	1.07254	4.51315	5.19442	4.81819	5.45601	2.13631	4.99544	2.85914	0.000129469	0.0010151
1679	sp|Q8NBS9|TXND5_HUMAN	sp|Q8NBS9|TXND5_HUMAN	7	sp|Q8NBS9|TXND5_HUMAN Thioredoxin domain-containing protein 5 OS=Homo sapiens GN=TXNDC5 PE=1 SV=2	-4.97546	-2.12092	sp|Q8NBS9|TXND5_HUMAN	2.85454	1.01388	4.69521	-3.34429	3.47791	0.00636973	0.0181115	-2.3074	1	44240	108890	NA	4304900	2528100	1425600	2830900	1873500	-6.13572	-5.87101	NA	-2.91965	-1.55043	-3.22468	-1.94988	-1.75867	-4.97546	-2.12092	2.85454	0.00636973	0.0181115
1529	sp|Q7L590|MCM10_HUMAN	sp|Q7L590|MCM10_HUMAN	39	sp|Q7L590|MCM10_HUMAN Protein MCM10 homolog OS=Homo sapiens GN=MCM10 PE=1 SV=2	1.07379	3.92283	sp|Q7L590|MCM10_HUMAN	2.84904	1.61456	4.08353	2.49831	5.10647	0.000389028	0.00215518	0.360429	0	3371200	19889000	7157200	78939000	68390000	190580000	320660000	181520000	0.303392	1.75583	0.559625	1.6763	2.89292	3.68131	4.61985	4.49724	1.07379	3.92283	2.84904	0.000389028	0.00215518
2044	sp|Q9BTK6|PAGR1_HUMAN	sp|Q9BTK6|PAGR1_HUMAN	2	sp|Q9BTK6|PAGR1_HUMAN PAXIP1-associated glutamate-rich protein 1 OS=Homo sapiens GN=PAGR1 PE=1 SV=1	-4.79885	-1.95011	sp|Q9BTK6|PAGR1_HUMAN	2.84874	1.69465	4.00283	-3.37448	5.46163	0.000229148	0.00145907	0.884037	0	141840	269550	114740	1592300	3880400	3578900	1673500	1336100	-4.40451	-4.5435	-5.75637	-4.49103	-0.973117	-1.9262	-2.68005	-2.22108	-4.79885	-1.95011	2.84874	0.000229148	0.00145907
1223	sp|Q14781|CBX2_HUMAN	sp|Q14781|CBX2_HUMAN	8	sp|Q14781|CBX2_HUMAN Chromobox protein homolog 2 OS=Homo sapiens GN=CBX2 PE=1 SV=2	-2.7189	0.127168	sp|Q14781|CBX2_HUMAN	2.84607	1.57233	4.1198	-1.29587	4.94396	0.000498621	0.00257188	0.114379	0	215030	540310	1300200	10456000	12444000	12774000	13128000	6126200	-3.78625	-3.52506	-2.04672	-1.51757	0.596993	-0.131297	0.181073	-0.138097	-2.7189	0.127168	2.84607	0.000498621	0.00257188
769	sp|P50219|MNX1_HUMAN	sp|P50219|MNX1_HUMAN	3	sp|P50219|MNX1_HUMAN Motor neuron and pancreas homeobox protein 1 OS=Homo sapiens GN=MNX1 PE=1 SV=3	-4.40322	-1.55892	sp|P50219|MNX1_HUMAN	2.8443	0.819262	4.86934	-2.27	3.36866	0.013209	0.0327795	-2.60352	4	NA	NA	NA	1683300	NA	6680200	2543200	2210800	NA	NA	NA	-4.40322	NA	-1.0458	-2.09874	-1.53223	-4.40322	-1.55892	2.8443	0.013209	0.0327795
218	sp|O60885|BRD4_HUMAN	sp|O60885|BRD4_HUMAN	41	sp|O60885|BRD4_HUMAN Bromodomain-containing protein 4 OS=Homo sapiens GN=BRD4 PE=1 SV=2	3.07834	5.92216	sp|O60885|BRD4_HUMAN	2.84382	1.86763	3.82001	4.50025	6.44581	5.79559e-05	0.000557314	2.23312	0	28398000	56511000	21513000	222960000	517510000	1013200000	1016000000	473560000	3.46998	3.28522	2.24137	3.31679	5.61977	6.03829	6.22172	5.80888	3.07834	5.92216	2.84382	5.79559e-05	0.000557314
1427	sp|Q5VUA4|ZN318_HUMAN	sp|Q5VUA4|ZN318_HUMAN	47	sp|Q5VUA4|ZN318_HUMAN Zinc finger protein 318 OS=Homo sapiens GN=ZNF318 PE=1 SV=2	0.927956	3.76878	sp|Q5VUA4|ZN318_HUMAN	2.84083	1.92991	3.75174	2.34837	6.90042	3.20769e-05	0.000390734	2.80692	0	4802600	14765000	7088900	52043000	179270000	193020000	174550000	81949000	0.829245	1.31952	0.544972	1.01809	4.19135	3.69926	3.77509	3.40944	0.927956	3.76878	2.84083	3.20769e-05	0.000390734
154	sp|O43159|RRP8_HUMAN	sp|O43159|RRP8_HUMAN	7	sp|O43159|RRP8_HUMAN Ribosomal RNA-processing protein 8 OS=Homo sapiens GN=RRP8 PE=1 SV=2	-3.9861	-1.15385	sp|O43159|RRP8_HUMAN	2.83225	0.402373	5.26213	-2.36767	2.61399	0.0268106	0.0577836	-3.70944	1	NA	636010	1503000	358480	9165200	4886900	2427600	2923100	NA	-3.28624	-1.82523	-6.84684	0.184928	-1.48676	-2.16336	-1.15021	-3.9861	-1.15385	2.83225	0.0268106	0.0577836
49	sp|A5YKK6|CNOT1_HUMAN	sp|A5YKK6|CNOT1_HUMAN	21	sp|A5YKK6|CNOT1_HUMAN CCR4-NOT transcription complex subunit 1 OS=Homo sapiens GN=CNOT1 PE=1 SV=2	-3.17344	-0.342584	sp|A5YKK6|CNOT1_HUMAN	2.83086	1.38405	4.27767	-1.75801	4.32927	0.00131855	0.00517766	-0.85127	0	250200	1140100	515980	3510000	22727000	11648000	6755900	1850300	-3.56115	-2.43143	-3.45901	-3.24218	1.40854	-0.261472	-0.74169	-1.77572	-3.17344	-0.342584	2.83086	0.00131855	0.00517766
501	sp|P18754|RCC1_HUMAN	sp|P18754|RCC1_HUMAN	17	sp|P18754|RCC1_HUMAN Regulator of chromosome condensation OS=Homo sapiens GN=RCC1 PE=1 SV=1	2.10654	4.92925	sp|P18754|RCC1_HUMAN	2.82272	1.41552	4.22992	3.5179	4.43834	0.00110535	0.00456854	-0.676062	0	6101200	22634000	62918000	66898000	266730000	621420000	591240000	143100000	1.18487	1.94517	3.8813	1.41481	4.72673	5.34866	5.4697	4.17193	2.10654	4.92925	2.82272	0.00110535	0.00456854
2200	sp|Q9HBD1|RC3H2_HUMAN	sp|Q9HBD1|RC3H2_HUMAN	7	sp|Q9HBD1|RC3H2_HUMAN Roquin-2 OS=Homo sapiens GN=RC3H2 PE=1 SV=2	-4.17312	-1.35216	sp|Q9HBD1|RC3H2_HUMAN	2.82096	0.977558	4.66435	-2.56114	3.43189	0.00686655	0.0191323	-2.38141	1	NA	351320	133330	4536200	938310	10581000	3173300	5306900	NA	-4.15548	-5.52691	-2.83696	-2.88588	-0.397003	-1.79129	-0.334474	-4.17312	-1.35216	2.82096	0.00686655	0.0191323
613	sp|P32322|P5CR1_HUMAN	sp|P32322|P5CR1_HUMAN	12	sp|P32322|P5CR1_HUMAN Pyrroline-5-carboxylate reductase 1, mitochondrial OS=Homo sapiens GN=PYCR1 PE=1 SV=2	0.402725	3.22262	sp|P32322|P5CR1_HUMAN	2.8199	1.06673	4.57306	2.65864	3.74842	0.0062669	0.017853	-1.98231	3	NA	NA	6458800	NA	76905000	177920000	83113000	88245000	NA	NA	0.402725	NA	3.05103	3.58435	2.74443	3.51068	0.402725	3.22262	2.8199	0.0062669	0.017853
156	sp|O43175|SERA_HUMAN	sp|O43175|SERA_HUMAN	8	sp|O43175|SERA_HUMAN D-3-phosphoglycerate dehydrogenase OS=Homo sapiens GN=PHGDH PE=1 SV=4	-3.29279	-0.482348	sp|O43175|SERA_HUMAN	2.81044	0.953114	4.66777	-1.88757	3.34807	0.00687691	0.0191386	-2.48619	0	427780	579650	132500	10924000	17346000	6850400	6537000	2868200	-2.76418	-3.42213	-5.53646	-1.44839	1.04449	-1.0103	-0.787441	-1.17614	-3.29279	-0.482348	2.81044	0.00687691	0.0191386
1347	sp|Q2TAY7|SMU1_HUMAN	sp|Q2TAY7|SMU1_HUMAN	7	sp|Q2TAY7|SMU1_HUMAN WD40 repeat-containing protein SMU1 OS=Homo sapiens GN=SMU1 PE=1 SV=2	-3.45931	-0.649992	sp|Q2TAY7|SMU1_HUMAN	2.80932	1.24022	4.37841	-1.58643	4.0833	0.00306089	0.0101599	-1.45358	2	NA	446590	NA	3805300	7095900	16962000	5238300	2082900	NA	-3.80407	NA	-3.11455	-0.159863	0.268723	-1.09508	-1.61375	-3.45931	-0.649992	2.80932	0.00306089	0.0101599
2048	sp|Q9BUI4|RPC3_HUMAN	sp|Q9BUI4|RPC3_HUMAN	6	sp|Q9BUI4|RPC3_HUMAN DNA-directed RNA polymerase III subunit RPC3 OS=Homo sapiens GN=POLR3C PE=1 SV=1	NA	-2.49308	sp|Q9BUI4|RPC3_HUMAN	NA	NA	NA	-2.49308	NA	NA	NA	NA	4	NA	NA	NA	NA	2958600	2518100	9820300	84987	NA	NA	NA	NA	-1.33856	-2.42212	-0.222151	-5.9895	-5.2973	-2.49308	2.80421	0	0
693	sp|P42704|LPPRC_HUMAN	sp|P42704|LPPRC_HUMAN	8	sp|P42704|LPPRC_HUMAN Leucine-rich PPR motif-containing protein, mitochondrial OS=Homo sapiens GN=LRPPRC PE=1 SV=3	NA	-2.50127	sp|P42704|LPPRC_HUMAN	NA	NA	NA	-2.50127	NA	NA	NA	NA	4	NA	NA	NA	NA	5795600	3449400	2426100	127930	NA	NA	NA	NA	-0.432599	-1.97819	-2.16422	-5.43007	-5.2973	-2.50127	2.79603	0	0
1682	sp|Q8NC96|NECP1_HUMAN	sp|Q8NC96|NECP1_HUMAN	6	sp|Q8NC96|NECP1_HUMAN Adaptin ear-binding coat-associated protein 1 OS=Homo sapiens GN=NECAP1 PE=1 SV=2	-1.75731	1.03402	sp|Q8NC96|NECP1_HUMAN	2.79132	1.32767	4.25498	-0.162267	4.27688	0.00180047	0.00657757	-1.05789	1	NA	1246200	3542800	5773600	8590600	28861000	46551000	14932000	NA	-2.30111	-0.514945	-2.45587	0.0976916	1.01853	1.93929	1.08056	-1.75731	1.03402	2.79132	0.00180047	0.00657757
814	sp|P52747|ZN143_HUMAN	sp|P52747|ZN143_HUMAN	3	sp|P52747|ZN143_HUMAN Zinc finger protein 143 OS=Homo sapiens GN=ZNF143 PE=1 SV=2	-4.91564	-2.12771	sp|P52747|ZN143_HUMAN	2.78793	1.21769	4.35817	-3.05702	4.04927	0.00321562	0.0105547	-1.50184	2	142470	NA	NA	877000	2517100	1893500	4445200	870490	-4.39792	NA	NA	-5.43336	-1.55631	-2.82428	-1.32312	-2.80713	-4.91564	-2.12771	2.78793	0.00321562	0.0105547
1317	sp|Q16531|DDB1_HUMAN	sp|Q16531|DDB1_HUMAN	3	sp|Q16531|DDB1_HUMAN DNA damage-binding protein 1 OS=Homo sapiens GN=DDB1 PE=1 SV=1	-6.10532	-3.31744	sp|Q16531|DDB1_HUMAN	2.78788	-0.427964	6.00373	-4.01441	2.07919	0.0789484	0.135999	-4.28461	4	NA	NA	NA	573180	NA	5422900	487180	310270	NA	NA	NA	-6.10532	NA	-1.33995	-4.39415	-4.21822	-6.10532	-3.31744	2.78788	0.0789484	0.135999
1693	sp|Q8NDT2|RB15B_HUMAN	sp|Q8NDT2|RB15B_HUMAN	8	sp|Q8NDT2|RB15B_HUMAN Putative RNA-binding protein 15B OS=Homo sapiens GN=RBM15B PE=1 SV=3	-3.2183	-0.435576	sp|Q8NDT2|RB15B_HUMAN	2.78273	1.58059	3.98486	-1.36315	5.27931	0.000602074	0.0029221	0.125014	2	NA	NA	627490	3434400	4666100	13271000	8133600	4854800	NA	NA	-3.16002	-3.27658	-0.724679	-0.077452	-0.483907	-0.456267	-3.2183	-0.435576	2.78273	0.000602074	0.0029221
1819	sp|Q92989|CLP1_HUMAN	sp|Q92989|CLP1_HUMAN	6	sp|Q92989|CLP1_HUMAN Polyribonucleotide 5-hydroxyl-kinase Clp1 OS=Homo sapiens GN=CLP1 PE=1 SV=1	-2.7994	-0.0267233	sp|Q92989|CLP1_HUMAN	2.77268	1.71827	3.82708	-1.21501	5.89724	0.000182384	0.00126595	1.19257	1	NA	822440	903050	4401100	8781200	10150000	17008000	5366400	NA	-2.90975	-2.60371	-2.88473	0.127259	-0.455668	0.540739	-0.319224	-2.7994	-0.0267233	2.77268	0.000182384	0.00126595
1907	sp|Q96I24|FUBP3_HUMAN	sp|Q96I24|FUBP3_HUMAN	26	sp|Q96I24|FUBP3_HUMAN Far upstream element-binding protein 3 OS=Homo sapiens GN=FUBP3 PE=1 SV=2	0.800416	3.57067	sp|Q96I24|FUBP3_HUMAN	2.77025	1.56614	3.97437	2.18554	5.09049	0.000398572	0.00219021	0.336415	0	2338400	7741600	9531400	101310000	129880000	222430000	105740000	90643000	-0.240163	0.373926	0.997387	2.07051	3.75712	3.89932	3.07888	3.54736	0.800416	3.57067	2.77025	0.000398572	0.00219021
2365	sp|Q9P2N5|RBM27_HUMAN	sp|Q9P2N5|RBM27_HUMAN	43	sp|Q9P2N5|RBM27_HUMAN RNA-binding protein 27 OS=Homo sapiens GN=RBM27 PE=1 SV=2	3.62849	6.39204	sp|Q9P2N5|RBM27_HUMAN	2.76355	1.48049	4.04661	5.01027	4.76574	0.000657432	0.00312181	-0.160001	0	16816000	88151000	34908000	609300000	480380000	1348200000	1430500000	1059600000	2.69137	3.93639	2.98107	4.90515	5.51945	6.44126	6.69697	6.9105	3.62849	6.39204	2.76355	0.000657432	0.00312181
1694	sp|Q8NDV7|TNR6A_HUMAN	sp|Q8NDV7|TNR6A_HUMAN	39	sp|Q8NDV7|TNR6A_HUMAN Trinucleotide repeat-containing gene 6A protein OS=Homo sapiens GN=TNRC6A PE=1 SV=2	0.284747	3.04621	sp|Q8NDV7|TNR6A_HUMAN	2.76146	1.4224	4.10052	1.66548	4.56296	0.00090541	0.00394966	-0.477841	0	8307000	2583800	4677700	45883000	65947000	137540000	86695000	76576000	1.64345	-1.23321	-0.0902997	0.819051	2.84391	3.22121	2.80304	3.31668	0.284747	3.04621	2.76146	0.00090541	0.00394966
1447	sp|Q69YH5|CDCA2_HUMAN	sp|Q69YH5|CDCA2_HUMAN	10	sp|Q69YH5|CDCA2_HUMAN Cell division cycle-associated protein 2 OS=Homo sapiens GN=CDCA2 PE=1 SV=2	-4.56423	-1.80302	sp|Q69YH5|CDCA2_HUMAN	2.7612	0.350263	5.17214	-2.9864	2.56843	0.0289464	0.0617043	-3.78296	1	NA	826740	65105	1953200	330200	10423000	5424800	2340400	NA	-2.90212	-6.6223	-4.16826	-4.29307	-0.418227	-1.04649	-1.45431	-4.56423	-1.80302	2.7612	0.0289464	0.0617043
604	sp|P31942|HNRH3_HUMAN	sp|P31942|HNRH3_HUMAN	12	sp|P31942|HNRH3_HUMAN Heterogeneous nuclear ribonucleoprotein H3 OS=Homo sapiens GN=HNRNPH3 PE=1 SV=2	0.658742	3.41049	sp|P31942|HNRH3_HUMAN	2.75175	1.47737	4.02612	2.03462	4.77772	0.000645238	0.00308683	-0.141415	0	5150900	3701800	14197000	45392000	87335000	262920000	77509000	96772000	0.933281	-0.706613	1.60625	0.802052	3.22239	4.13524	2.64747	3.63685	0.658742	3.41049	2.75175	0.000645238	0.00308683
2118	sp|Q9H0E3|SP130_HUMAN	sp|Q9H0E3|SP130_HUMAN	10	sp|Q9H0E3|SP130_HUMAN Histone deacetylase complex subunit SAP130 OS=Homo sapiens GN=SAP130 PE=1 SV=1	-1.84345	0.907763	sp|Q9H0E3|SP130_HUMAN	2.75121	1.04883	4.45359	-0.271328	3.62429	0.00502368	0.0149502	-2.07316	1	256700	4768900	1661900	NA	30696000	17239000	23785000	9906900	-3.52304	-0.335644	-1.67166	NA	1.81354	0.291574	1.00657	0.519366	-1.84345	0.907763	2.75121	0.00502368	0.0149502
1380	sp|Q58A45|PAN3_HUMAN	sp|Q58A45|PAN3_HUMAN	6	sp|Q58A45|PAN3_HUMAN PAB-dependent poly(A)-specific ribonuclease subunit PAN3 OS=Homo sapiens GN=PAN3 PE=1 SV=3	NA	-2.55222	sp|Q58A45|PAN3_HUMAN	NA	NA	NA	-2.55222	NA	NA	NA	NA	4	NA	NA	NA	NA	1206700	2394900	2276400	803670	NA	NA	NA	NA	-2.54693	-2.49289	-2.25269	-2.91638	-5.2973	-2.55222	2.74508	0	0
1537	sp|Q7Z3B4|NUP54_HUMAN	sp|Q7Z3B4|NUP54_HUMAN	5	sp|Q7Z3B4|NUP54_HUMAN Nucleoporin p54 OS=Homo sapiens GN=NUP54 PE=1 SV=2	-3.94591	-1.20896	sp|Q7Z3B4|NUP54_HUMAN	2.73695	1.63648	3.83742	-2.57744	5.50297	0.000215708	0.00141017	0.943715	0	123540	529580	325740	3062700	5768400	7303200	4032100	1549600	-4.60977	-3.55444	-4.16189	-3.45756	-0.438937	-0.920012	-1.4586	-2.0183	-3.94591	-1.20896	2.73695	0.000215708	0.00141017
1283	sp|Q15528|MED22_HUMAN	sp|Q15528|MED22_HUMAN	3	sp|Q15528|MED22_HUMAN Mediator of RNA polymerase II transcription subunit 22 OS=Homo sapiens GN=MED22 PE=1 SV=2	-4.47196	-1.73621	sp|Q15528|MED22_HUMAN	2.73575	1.20434	4.26715	-3.10408	3.95271	0.00245316	0.00843945	-1.46761	0	58128	262220	901180	1178100	928090	5910000	4344500	2312600	-5.73003	-4.58388	-2.60688	-4.96703	-2.90064	-1.21861	-1.35495	-1.47065	-4.47196	-1.73621	2.73575	0.00245316	0.00843945
671	sp|P40763|STAT3_HUMAN	sp|P40763|STAT3_HUMAN	15	sp|P40763|STAT3_HUMAN Signal transducer and activator of transcription 3 OS=Homo sapiens GN=STAT3 PE=1 SV=2	-1.20172	1.52237	sp|P40763|STAT3_HUMAN	2.72409	1.46384	3.98435	0.160327	4.78268	0.000640254	0.00307114	-0.133718	0	1397600	4873600	791880	17614000	24129000	52289000	35313000	16151000	-1.00499	-0.303838	-2.80446	-0.693596	1.4892	1.85689	1.55551	1.1879	-1.20172	1.52237	2.72409	0.000640254	0.00307114
1338	sp|Q1MSJ5|CSPP1_HUMAN	sp|Q1MSJ5|CSPP1_HUMAN	6	sp|Q1MSJ5|CSPP1_HUMAN Centrosome and spindle pole-associated protein 1 OS=Homo sapiens GN=CSPP1 PE=1 SV=4	-4.73914	-2.01695	sp|Q1MSJ5|CSPP1_HUMAN	2.72219	0.514827	4.92955	-2.56139	2.87397	0.0220155	0.0495297	-3.16539	3	NA	NA	NA	1360900	1154300	1790800	5916500	2055100	NA	NA	NA	-4.73914	-2.60675	-2.90295	-0.925972	-1.63212	-4.73914	-2.01695	2.72219	0.0220155	0.0495297
1294	sp|Q15651|HMGN3_HUMAN	sp|Q15651|HMGN3_HUMAN	4	sp|Q15651|HMGN3_HUMAN High mobility group nucleosome-binding domain-containing protein 3 OS=Homo sapiens GN=HMGN3 PE=1 SV=2	-3.79949	-1.08033	sp|Q15651|HMGN3_HUMAN	2.71916	1.48045	3.95788	-2.24568	4.92289	0.00069087	0.00320726	-0.11132	1	221660	399640	443420	NA	2150800	6619000	3758400	7090800	-3.74112	-3.96674	-3.6906	NA	-1.76821	-1.05878	-1.55624	0.0619136	-3.79949	-1.08033	2.71916	0.00069087	0.00320726
106	sp|O14641|DVL2_HUMAN	sp|O14641|DVL2_HUMAN	16	sp|O14641|DVL2_HUMAN Segment polarity protein dishevelled homolog DVL-2 OS=Homo sapiens GN=DVL2 PE=1 SV=1	-0.513985	2.19949	sp|O14641|DVL2_HUMAN	2.71347	1.81283	3.61412	0.842752	6.66624	4.33615e-05	0.000482703	2.51513	0	1928700	5084500	2672700	22002000	33863000	89522000	50365000	33554000	-0.526383	-0.241793	-0.94561	-0.342152	1.94584	2.61542	2.04867	2.18803	-0.513985	2.19949	2.71347	4.33615e-05	0.000482703
292	sp|O94913|PCF11_HUMAN	sp|O94913|PCF11_HUMAN	27	sp|O94913|PCF11_HUMAN Pre-mRNA cleavage complex 2 protein Pcf11 OS=Homo sapiens GN=PCF11 PE=1 SV=3	-0.145101	2.56349	sp|O94913|PCF11_HUMAN	2.70859	1.60016	3.81701	1.20919	5.40686	0.000248346	0.00154643	0.804559	0	1288800	4292800	5914200	44384000	64955000	83449000	83592000	32915000	-1.12541	-0.489682	0.268118	0.766571	2.82349	2.51632	2.75241	2.16173	-0.145101	2.56349	2.70859	0.000248346	0.00154643
1566	sp|Q86U06|RBM23_HUMAN	sp|Q86U06|RBM23_HUMAN	3	sp|Q86U06|RBM23_HUMAN Probable RNA-binding protein 23 OS=Homo sapiens GN=RBM23 PE=1 SV=1	-7.47221	-4.76806	sp|Q86U06|RBM23_HUMAN	2.70415	0.0458404	5.36247	-5.4441	2.43972	0.0471454	0.0907421	-3.80494	4	NA	36490	NA	NA	181700	227740	1000800	NA	NA	-7.47221	NA	NA	-5.09792	-5.81209	-3.39417	NA	-7.47221	-4.76806	2.70415	0.0471454	0.0907421
2497	sp|Q9Y253|POLH_HUMAN	sp|Q9Y253|POLH_HUMAN	14	sp|Q9Y253|POLH_HUMAN DNA polymerase eta OS=Homo sapiens GN=POLH PE=1 SV=1	-1.60803	1.08133	sp|Q9Y253|POLH_HUMAN	2.68936	0.593227	4.7855	-0.0712531	2.87731	0.0172239	0.0407688	-3.28189	1	334060	1535200	NA	33102000	6023300	69060000	53993000	8509500	-3.13163	-1.99566	NA	0.303195	-0.380675	2.24933	2.14528	0.311388	-1.60803	1.08133	2.68936	0.0172239	0.0407688
1262	sp|Q15269|PWP2_HUMAN	sp|Q15269|PWP2_HUMAN	17	sp|Q15269|PWP2_HUMAN Periodic tryptophan protein 2 homolog OS=Homo sapiens GN=PWP2 PE=2 SV=2	-1.03956	1.64725	sp|Q15269|PWP2_HUMAN	2.68681	1.27263	4.10099	0.303844	4.20379	0.00161832	0.0060913	-1.05475	0	795340	4064600	6252200	7237000	34460000	70046000	16997000	25460000	-1.84267	-0.569682	0.353046	-2.09894	1.96939	2.26933	0.53984	1.81044	-1.03956	1.64725	2.68681	0.00161832	0.0060913
2565	sp|Q9Y5B9|SP16H_HUMAN	sp|Q9Y5B9|SP16H_HUMAN	50	sp|Q9Y5B9|SP16H_HUMAN FACT complex subunit SPT16 OS=Homo sapiens GN=SUPT16H PE=1 SV=1	2.67755	5.36318	sp|Q9Y5B9|SP16H_HUMAN	2.68563	1.70645	3.6648	4.02037	6.06867	9.66254e-05	0.000814414	1.73372	0	16347000	38473000	41548000	102670000	462440000	921750000	444190000	263540000	2.64934	2.72213	3.24716	2.09158	5.46817	5.90484	5.07248	5.00722	2.67755	5.36318	2.68563	9.66254e-05	0.000814414
2264	sp|Q9NRX1|PNO1_HUMAN	sp|Q9NRX1|PNO1_HUMAN	3	sp|Q9NRX1|PNO1_HUMAN RNA-binding protein PNO1 OS=Homo sapiens GN=PNO1 PE=1 SV=1	-3.49494	-0.813888	sp|Q9NRX1|PNO1_HUMAN	2.68105	0.184306	5.1778	-2.95873	2.50247	0.038496	0.0777829	-3.68939	3	340410	536230	1103500	1123100	NA	7873800	NA	NA	-3.10365	-3.53616	-2.29738	-5.04257	NA	-0.813888	NA	NA	-3.49494	-0.813888	2.68105	0.038496	0.0777829
2428	sp|Q9UKM9|RALY_HUMAN	sp|Q9UKM9|RALY_HUMAN	10	sp|Q9UKM9|RALY_HUMAN RNA-binding protein Raly OS=Homo sapiens GN=RALY PE=1 SV=1	0.41871	3.09799	sp|Q9UKM9|RALY_HUMAN	2.67928	1.37464	3.98393	1.75835	4.54396	0.000933259	0.00402649	-0.507935	0	2148100	9555200	17487000	19098000	84853000	170200000	108600000	44386000	-0.366293	0.682183	1.92475	-0.565794	3.18355	3.52177	3.11595	2.57071	0.41871	3.09799	2.67928	0.000933259	0.00402649
274	sp|O75928|PIAS2_HUMAN	sp|O75928|PIAS2_HUMAN	6	sp|O75928|PIAS2_HUMAN E3 SUMO-protein ligase PIAS2 OS=Homo sapiens GN=PIAS2 PE=1 SV=3	-7.77159	-5.09339	sp|O75928|PIAS2_HUMAN	2.6782	0.625324	4.73107	-5.76294	3.12893	0.0181517	0.0424646	-2.90372	4	NA	NA	NA	199650	194130	549580	NA	104860	NA	NA	NA	-7.77159	-5.00876	-4.56934	NA	-5.70208	-7.77159	-5.09339	2.6782	0.0181517	0.0424646
1637	sp|Q8IYH5|ZZZ3_HUMAN	sp|Q8IYH5|ZZZ3_HUMAN	15	sp|Q8IYH5|ZZZ3_HUMAN ZZ-type zinc finger-containing protein 3 OS=Homo sapiens GN=ZZZ3 PE=1 SV=1	-2.01392	0.662204	sp|Q8IYH5|ZZZ3_HUMAN	2.67612	0.329474	5.02277	-0.484706	2.55749	0.0294841	0.0625713	-3.80059	1	NA	2861300	901820	6165300	61043000	42389000	17801000	1302600	NA	-1.0838	-2.60579	-2.35216	2.7398	1.56079	0.604037	-2.25581	-2.01392	0.662204	2.67612	0.0294841	0.0625713
1563	sp|Q86TJ2|TAD2B_HUMAN	sp|Q86TJ2|TAD2B_HUMAN	4	sp|Q86TJ2|TAD2B_HUMAN Transcriptional adapter 2-beta OS=Homo sapiens GN=TADA2B PE=1 SV=2	-3.70308	-1.03126	sp|Q86TJ2|TAD2B_HUMAN	2.67182	0.105835	5.23781	-1.56562	2.42656	0.0431983	0.084886	-3.79671	3	NA	NA	NA	2621900	7480300	15164000	2719300	1416500	NA	NA	NA	-3.70308	-0.0887808	0.110653	-2.00575	-2.14115	-3.70308	-1.03126	2.67182	0.0431983	0.084886
1351	sp|Q3KNV8|PCGF3_HUMAN	sp|Q3KNV8|PCGF3_HUMAN	5	sp|Q3KNV8|PCGF3_HUMAN Polycomb group RING finger protein 3 OS=Homo sapiens GN=PCGF3 PE=1 SV=1	-3.47949	-0.81235	sp|Q3KNV8|PCGF3_HUMAN	2.66714	0.434438	4.89985	-1.34578	2.7839	0.0251848	0.0548809	-3.29191	3	NA	NA	509110	NA	7969500	13737000	4099300	1842400	NA	NA	-3.47949	NA	-0.00342543	-0.0287667	-1.43564	-1.78157	-3.47949	-0.81235	2.66714	0.0251848	0.0548809
361	sp|P04406|G3P_HUMAN	sp|P04406|G3P_HUMAN	14	sp|P04406|G3P_HUMAN Glyceraldehyde-3-phosphate dehydrogenase OS=Homo sapiens GN=GAPDH PE=1 SV=3	-0.606587	2.05958	sp|P04406|G3P_HUMAN	2.66617	-0.103365	5.4357	0.726497	2.13005	0.0576269	0.10625	-4.52761	0	2346300	305140	10730000	51200000	37240000	81297000	214460000	5147600	-0.235151	-4.36187	1.17839	0.992284	2.07392	2.47946	4.0611	-0.376162	-0.606587	2.05958	2.66617	0.0576269	0.10625
2320	sp|Q9NY61|AATF_HUMAN	sp|Q9NY61|AATF_HUMAN	14	sp|Q9NY61|AATF_HUMAN Protein AATF OS=Homo sapiens GN=AATF PE=1 SV=1	-2.64574	0.0192056	sp|Q9NY61|AATF_HUMAN	2.66494	1.24182	4.08806	-1.31327	4.14339	0.00178736	0.00656015	-1.1534	0	292970	843500	1841600	4445700	13035000	21290000	3396100	9948000	-3.32666	-2.87272	-1.51476	-2.8688	0.659511	0.589319	-1.69704	0.525029	-2.64574	0.0192056	2.66494	0.00178736	0.00656015
1603	sp|Q8IUE6|H2A2B_HUMAN	sp|Q8IUE6|H2A2B_HUMAN	5	sp|Q8IUE6|H2A2B_HUMAN Histone H2A type 2-B OS=Homo sapiens GN=HIST2H2AB PE=1 SV=3	0.719749	3.38056	sp|Q8IUE6|H2A2B_HUMAN	2.66081	1.6486	3.67303	2.24021	5.8952	0.000182868	0.00126595	1.19	1	4121000	10625000	7948300	NA	83972000	211810000	103830000	85590000	0.601807	0.837608	0.719831	NA	3.16948	3.83031	3.05356	3.4689	0.719749	3.38056	2.66081	0.000182868	0.00126595
2288	sp|Q9NV56|MRGBP_HUMAN	sp|Q9NV56|MRGBP_HUMAN	2	sp|Q9NV56|MRGBP_HUMAN MRG/MORF4L-binding protein OS=Homo sapiens GN=MRGBP PE=1 SV=1	-4.91602	-2.25705	sp|Q9NV56|MRGBP_HUMAN	2.65898	0.717229	4.60073	-4.25128	3.28426	0.0147594	0.0358356	-2.70822	4	126130	NA	153510	1262600	NA	2830700	NA	NA	-4.57894	NA	-5.31154	-4.85759	NA	-2.25705	NA	NA	-4.91602	-2.25705	2.65898	0.0147594	0.0358356
2499	sp|Q9Y265|RUVB1_HUMAN	sp|Q9Y265|RUVB1_HUMAN	29	sp|Q9Y265|RUVB1_HUMAN RuvB-like 1 OS=Homo sapiens GN=RUVBL1 PE=1 SV=1	3.81345	6.46556	sp|Q9Y265|RUVB1_HUMAN	2.65212	1.58897	3.71526	5.1395	5.51961	0.000210536	0.00138403	0.967669	0	30365000	60018000	50000000	563170000	1309900000	1667500000	1178700000	478140000	3.56949	3.3734	3.53013	4.78076	6.87105	6.74111	6.42804	5.82205	3.81345	6.46556	2.65212	0.000210536	0.00138403
1342	sp|Q2M1P5|KIF7_HUMAN	sp|Q2M1P5|KIF7_HUMAN	34	sp|Q2M1P5|KIF7_HUMAN Kinesin-like protein KIF7 OS=Homo sapiens GN=KIF7 PE=1 SV=2	-0.455966	2.19456	sp|Q2M1P5|KIF7_HUMAN	2.65053	1.43291	3.86815	0.869299	4.81649	0.000607379	0.00293732	-0.0813938	0	1850600	2028000	3563500	47026000	27565000	78682000	68702000	33760000	-0.587806	-1.58794	-0.506043	0.857927	1.66858	2.43334	2.47993	2.1964	-0.455966	2.19456	2.65053	0.000607379	0.00293732
1139	sp|Q13330|MTA1_HUMAN	sp|Q13330|MTA1_HUMAN	19	sp|Q13330|MTA1_HUMAN Metastasis-associated protein MTA1 OS=Homo sapiens GN=MTA1 PE=1 SV=2	-0.193425	2.45408	sp|Q13330|MTA1_HUMAN	2.6475	1.69631	3.59869	1.13033	6.15852	8.53988e-05	0.000746348	1.85466	0	2589700	6222000	3057800	27336000	69194000	89888000	64175000	27207000	-0.0884865	0.053894	-0.739916	0.000809372	2.90867	2.62117	2.38525	1.90122	-0.193425	2.45408	2.6475	8.53988e-05	0.000746348
977	sp|P78332|RBM6_HUMAN	sp|P78332|RBM6_HUMAN	55	sp|P78332|RBM6_HUMAN RNA-binding protein 6 OS=Homo sapiens GN=RBM6 PE=1 SV=5	1.56856	4.20901	sp|P78332|RBM6_HUMAN	2.64045	1.30567	3.97524	2.88878	4.37699	0.00122038	0.00491105	-0.774414	0	4277600	24821000	10284000	126650000	69239000	270080000	460060000	200330000	0.657226	2.08026	1.11352	2.42323	2.90955	4.17314	5.12124	4.63211	1.56856	4.20901	2.64045	0.00122038	0.00491105
1008	sp|P98179|RBM3_HUMAN	sp|P98179|RBM3_HUMAN	4	sp|P98179|RBM3_HUMAN RNA-binding protein 3 OS=Homo sapiens GN=RBM3 PE=1 SV=1	-1.13249	1.50728	sp|P98179|RBM3_HUMAN	2.63977	0.513312	4.76622	0.187396	2.74674	0.0196826	0.045451	-3.51109	0	719580	458120	10977000	27583000	10398000	72127000	37301000	24040000	-1.99141	-3.76673	1.21317	0.0150212	0.354968	2.31063	1.63158	1.73194	-1.13249	1.50728	2.63977	0.0196826	0.045451
23	REV__sp|Q13576|IQGA2_HUMAN	REV__sp|Q13576|IQGA2_HUMAN	3	sp|Q13576|IQGA2_HUMAN Ras GTPase-activating-like protein IQGAP2 OS=Homo sapiens GN=IQGAP2 PE=1 SV=4	-1.46482	1.17493	REV__sp|Q13576|IQGA2_HUMAN	2.63975	0.755445	4.52405	0.514992	3.35991	0.0133613	0.0330978	-2.61433	4	NA	NA	NA	10811000	17118000	30283000	31841000	NA	NA	NA	NA	-1.46482	1.02666	1.08637	1.41175	NA	-1.46482	1.17493	2.63975	0.0133613	0.0330978
2163	sp|Q9H6L4|ARMC7_HUMAN	sp|Q9H6L4|ARMC7_HUMAN	4	sp|Q9H6L4|ARMC7_HUMAN Armadillo repeat-containing protein 7 OS=Homo sapiens GN=ARMC7 PE=1 SV=1	-5.93293	-3.29521	sp|Q9H6L4|ARMC7_HUMAN	2.63773	-1.84015	7.1156	-3.82275	1.37276	0.209239	0.302762	-5.19967	3	NA	NA	NA	639260	148400	6319300	202430	3095200	NA	NA	NA	-5.93293	-5.37069	-1.12414	-5.61403	-1.07195	-5.93293	-3.29521	2.63773	0.209239	0.302762
2470	sp|Q9UPN4|CP131_HUMAN	sp|Q9UPN4|CP131_HUMAN	31	sp|Q9UPN4|CP131_HUMAN Centrosomal protein of 131 kDa OS=Homo sapiens GN=CEP131 PE=1 SV=3	-0.388535	2.24371	sp|Q9UPN4|CP131_HUMAN	2.63224	1.68565	3.57884	0.927585	6.15276	8.6075e-05	0.000746827	1.84695	0	1859900	6707100	3942500	16613000	32945000	62588000	84884000	33401000	-0.580357	0.163846	-0.351594	-0.786036	1.90881	2.11051	2.77372	2.18178	-0.388535	2.24371	2.63224	8.6075e-05	0.000746827
449	sp|P13056|NR2C1_HUMAN	sp|P13056|NR2C1_HUMAN	18	sp|P13056|NR2C1_HUMAN Nuclear receptor subfamily 2 group C member 1 OS=Homo sapiens GN=NR2C1 PE=1 SV=2	-0.88979	1.73732	sp|P13056|NR2C1_HUMAN	2.62711	1.43038	3.82384	0.423765	4.85725	0.000570091	0.00281468	-0.0185157	0	1399800	3359800	1367300	32248000	17452000	49445000	45813000	33886000	-1.00265	-0.848584	-1.96983	0.261899	1.0527	1.778	1.91709	2.2015	-0.88979	1.73732	2.62711	0.000570091	0.00281468
1048	sp|Q04837|SSBP_HUMAN	sp|Q04837|SSBP_HUMAN	7	sp|Q04837|SSBP_HUMAN Single-stranded DNA-binding protein, mitochondrial OS=Homo sapiens GN=SSBP1 PE=1 SV=1	-2.14389	0.476605	sp|Q04837|SSBP_HUMAN	2.62049	-0.0761038	5.31709	-0.0474937	2.26467	0.0552674	0.102945	-4.02489	3	NA	NA	1220100	NA	6363200	45040000	5782500	20658000	NA	NA	-2.14389	NA	-0.306709	1.64637	-0.957793	1.52455	-2.14389	0.476605	2.62049	0.0552674	0.102945
1477	sp|Q6P2H3|CEP85_HUMAN	sp|Q6P2H3|CEP85_HUMAN	19	sp|Q6P2H3|CEP85_HUMAN Centrosomal protein of 85 kDa OS=Homo sapiens GN=CEP85 PE=1 SV=1	-0.904626	1.71249	sp|Q6P2H3|CEP85_HUMAN	2.61711	1.42197	3.81225	0.40393	4.8452	0.000580853	0.00285586	-0.0370743	0	1564300	3575700	1898400	19226000	10652000	71089000	37893000	42734000	-0.837548	-0.757372	-1.46834	-0.55524	0.387486	2.29018	1.65345	2.51883	-0.904626	1.71249	2.61711	0.000580853	0.00285586
1538	sp|Q7Z3K3|POGZ_HUMAN	sp|Q7Z3K3|POGZ_HUMAN	18	sp|Q7Z3K3|POGZ_HUMAN Pogo transposable element with ZNF domain OS=Homo sapiens GN=POGZ PE=1 SV=2	-1.60855	0.99868	sp|Q7Z3K3|POGZ_HUMAN	2.60723	1.29798	3.91648	-0.304936	4.40623	0.00116408	0.00475298	-0.727486	0	984370	1469600	1015700	20882000	29793000	43622000	18598000	6559100	-1.52582	-2.05962	-2.42407	-0.424698	1.77331	1.60124	0.664875	-0.0447027	-1.60855	0.99868	2.60723	0.00116408	0.00475298
1900	sp|Q96GY3|LIN37_HUMAN	sp|Q96GY3|LIN37_HUMAN	5	sp|Q96GY3|LIN37_HUMAN Protein lin-37 homolog OS=Homo sapiens GN=LIN37 PE=1 SV=1	-4.45105	-1.84744	sp|Q96GY3|LIN37_HUMAN	2.60361	0.416459	4.79077	-2.96328	2.66964	0.0244141	0.0536473	-3.61938	1	52918	812970	NA	1527300	578850	12478000	6925400	766360	-5.86957	-2.92671	NA	-4.55688	-3.53672	-0.16437	-0.707271	-2.9814	-4.45105	-1.84744	2.60361	0.0244141	0.0536473
1576	sp|Q86V15|CASZ1_HUMAN	sp|Q86V15|CASZ1_HUMAN	2	sp|Q86V15|CASZ1_HUMAN Zinc finger protein castor homolog 1 OS=Homo sapiens GN=CASZ1 PE=1 SV=4	NA	-2.69556	sp|Q86V15|CASZ1_HUMAN	NA	NA	NA	-2.69556	NA	NA	NA	NA	4	NA	NA	NA	NA	474990	2901800	1973300	1255800	NA	NA	NA	NA	-3.80317	-2.22205	-2.45116	-2.30586	-5.2973	-2.69556	2.60174	0	0
711	sp|P46109|CRKL_HUMAN	sp|P46109|CRKL_HUMAN	19	sp|P46109|CRKL_HUMAN Crk-like protein OS=Homo sapiens GN=CRKL PE=1 SV=1	2.98447	5.58556	sp|P46109|CRKL_HUMAN	2.60109	1.56221	3.63997	4.28501	5.53988	0.000204418	0.00135513	0.996771	0	29611000	27696000	26753000	265130000	362750000	893060000	626110000	467640000	3.53213	2.24077	2.57448	3.59048	5.14102	5.86024	5.54929	5.79167	2.98447	5.58556	2.60109	0.000204418	0.00135513
1823	sp|Q93009|UBP7_HUMAN	sp|Q93009|UBP7_HUMAN	32	sp|Q93009|UBP7_HUMAN Ubiquitin carboxyl-terminal hydrolase 7 OS=Homo sapiens GN=USP7 PE=1 SV=2	1.30707	3.90749	sp|Q93009|UBP7_HUMAN	2.60041	1.29115	3.90968	2.60728	4.39465	0.00118603	0.00481196	-0.74605	0	4424600	8984300	8468900	195870000	139280000	240710000	212900000	102610000	0.707433	0.591956	0.816778	3.11212	3.85126	4.01074	4.05096	3.71698	1.30707	3.90749	2.60041	0.00118603	0.00481196
1484	sp|Q6PI98|IN80C_HUMAN	sp|Q6PI98|IN80C_HUMAN	2	sp|Q6PI98|IN80C_HUMAN INO80 complex subunit C OS=Homo sapiens GN=INO80C PE=1 SV=1	-5.69034	-3.09084	sp|Q6PI98|IN80C_HUMAN	2.5995	1.58432	3.61468	-4.20492	5.74254	0.000223346	0.00144392	0.995576	1	NA	137860	106310	753800	753940	1195900	1273900	975620	NA	-5.52552	-5.87298	-5.67253	-3.18065	-3.47253	-3.05902	-2.65118	-5.69034	-3.09084	2.5995	0.000223346	0.00144392
1607	sp|Q8IVF2|AHNK2_HUMAN	sp|Q8IVF2|AHNK2_HUMAN	4	sp|Q8IVF2|AHNK2_HUMAN Protein AHNAK2 OS=Homo sapiens GN=AHNAK2 PE=1 SV=2	-1.71901	0.879484	sp|Q8IVF2|AHNK2_HUMAN	2.59849	1.02368	4.1733	0.0133211	3.76317	0.00489891	0.0146719	-1.91417	2	NA	NA	1976900	7552200	6375900	46346000	30654000	11954000	NA	NA	-1.40643	-2.03159	-0.304023	1.68669	1.35898	0.776294	-1.71901	0.879484	2.59849	0.00489891	0.0146719
2407	sp|Q9UIG0|BAZ1B_HUMAN	sp|Q9UIG0|BAZ1B_HUMAN	41	sp|Q9UIG0|BAZ1B_HUMAN Tyrosine-protein kinase BAZ1B OS=Homo sapiens GN=BAZ1B PE=1 SV=2	0.498735	3.09659	sp|Q9UIG0|BAZ1B_HUMAN	2.59785	1.49814	3.69756	1.79766	5.22691	0.000324456	0.00187677	0.540171	0	3543200	5573800	8465300	48562000	100080000	204540000	51218000	66679000	0.377334	-0.107229	0.816128	0.908708	3.40593	3.78104	2.072	3.12738	0.498735	3.09659	2.59785	0.000324456	0.00187677
544	sp|P25440|BRD2_HUMAN	sp|P25440|BRD2_HUMAN	11	sp|P25440|BRD2_HUMAN Bromodomain-containing protein 2 OS=Homo sapiens GN=BRD2 PE=1 SV=2	-2.49286	0.10048	sp|P25440|BRD2_HUMAN	2.59334	0.56754	4.61914	-0.418188	2.98333	0.018719	0.0435005	-3.01259	3	NA	NA	NA	5640000	4639000	26869000	9633600	9525200	NA	NA	NA	-2.49286	-0.732527	0.917636	-0.248812	0.465623	-2.49286	0.10048	2.59334	0.018719	0.0435005
301	sp|O95202|LETM1_HUMAN	sp|O95202|LETM1_HUMAN	2	sp|O95202|LETM1_HUMAN LETM1 and EF-hand domain-containing protein 1, mitochondrial OS=Homo sapiens GN=LETM1 PE=1 SV=1	-7.92934	-5.33934	sp|O95202|LETM1_HUMAN	2.59	0.157882	5.02212	-5.98684	2.55406	0.0401017	0.0799325	-3.65285	4	NA	NA	27679	NA	318300	331150	115660	NA	NA	NA	-7.92934	NA	-4.34253	-5.28397	-6.39152	NA	-7.92934	-5.33934	2.59	0.0401017	0.0799325
2536	sp|Q9Y3D9|RT23_HUMAN	sp|Q9Y3D9|RT23_HUMAN	4	sp|Q9Y3D9|RT23_HUMAN 28S ribosomal protein S23, mitochondrial OS=Homo sapiens GN=MRPS23 PE=1 SV=2	-3.61095	-1.02152	sp|Q9Y3D9|RT23_HUMAN	2.58944	1.20127	3.9776	-2.31623	4.12735	0.00183527	0.00668401	-1.17966	0	321740	396640	884350	1446400	6887400	3751600	10685000	1663400	-3.18747	-3.97778	-2.63569	-4.64287	-0.200047	-1.85971	-0.104933	-1.92137	-3.61095	-1.02152	2.58944	0.00183527	0.00668401
1437	sp|Q5W0B1|RN219_HUMAN	sp|Q5W0B1|RN219_HUMAN	9	sp|Q5W0B1|RN219_HUMAN RING finger protein 219 OS=Homo sapiens GN=RNF219 PE=1 SV=1	-2.91252	-0.327175	sp|Q5W0B1|RN219_HUMAN	2.58534	0.660281	4.5104	-1.43518	3.01183	0.0137524	0.0338787	-3.06273	1	125980	NA	651240	14025000	14277000	13170000	8424900	2154400	-4.5807	NA	-3.10325	-1.05359	0.782139	-0.0882292	-0.435031	-1.56758	-2.91252	-0.327175	2.58534	0.0137524	0.0338787
311	sp|O95391|SLU7_HUMAN	sp|O95391|SLU7_HUMAN	21	sp|O95391|SLU7_HUMAN Pre-mRNA-splicing factor SLU7 OS=Homo sapiens GN=SLU7 PE=1 SV=2	0.0411511	2.6212	sp|O95391|SLU7_HUMAN	2.58005	1.00571	4.15439	1.33118	3.6261	0.00426154	0.0131812	-2.01442	0	845940	14252000	2884500	69582000	47842000	76432000	92431000	52062000	-1.75102	1.26773	-0.829073	1.47696	2.41147	2.39241	2.89203	2.7889	0.0411511	2.6212	2.58005	0.00426154	0.0131812
2178	sp|Q9H8G1|ZN430_HUMAN;sp|O95780|ZN682_HUMAN;sp|Q9P255|ZN492_HUMAN;sp|Q8IYN0|ZN100_HUMAN;sp|Q96ND8|ZN583_HUMAN;sp|A6NK75|ZNF98_HUMAN;sp|A8MTY0|ZN724_HUMAN;sp|Q6ECI4|ZN470_HUMAN;sp|Q8NHY6|ZFP28_HUMAN;sp|Q05481|ZNF91_HUMAN	sp|Q9H8G1|ZN430_HUMAN	2	sp|Q9H8G1|ZN430_HUMAN Zinc finger protein 430 OS=Homo sapiens GN=ZNF430 PE=1 SV=3;sp|O95780|ZN682_HUMAN Zinc finger protein 682 OS=Homo sapiens GN=ZNF682 PE=2 SV=1;sp|Q9P255|ZN492_HUMAN Zinc finger protein 492 OS=Homo sapiens GN=ZNF492 PE=2 SV=2;sp|Q8IYN0|	-0.927542	1.65169	sp|Q9H8G1|ZN430_HUMAN	2.57923	1.27496	3.88351	0.546304	4.43483	0.0014167	0.0054453	-0.820647	1	2014200	4699500	1372900	NA	22047000	29690000	63519000	25446000	-0.46193	-0.357114	-1.96358	NA	1.36761	1.05848	2.37098	1.80969	-0.927542	1.65169	2.57923	0.0014167	0.0054453
2316	sp|Q9NXR8|ING3_HUMAN	sp|Q9NXR8|ING3_HUMAN	4	sp|Q9NXR8|ING3_HUMAN Inhibitor of growth protein 3 OS=Homo sapiens GN=ING3 PE=1 SV=2	-5.84474	-3.27144	sp|Q9NXR8|ING3_HUMAN	2.5733	0.203314	4.94328	-3.91476	2.60412	0.0373724	0.0760334	-3.58644	4	NA	NA	NA	675960	1603700	975390	700070	NA	NA	NA	NA	-5.84474	-2.1637	-3.76005	-3.89057	NA	-5.84474	-3.27144	2.5733	0.0373724	0.0760334
1889	sp|Q96G21|IMP4_HUMAN	sp|Q96G21|IMP4_HUMAN	6	sp|Q96G21|IMP4_HUMAN U3 small nucleolar ribonucleoprotein protein IMP4 OS=Homo sapiens GN=IMP4 PE=1 SV=1	-2.18566	0.377597	sp|Q96G21|IMP4_HUMAN	2.56326	1.32858	3.79795	-0.904034	4.73474	0.00123025	0.00492101	-0.583985	2	640040	NA	1133600	7072500	12938000	25262000	NA	5257400	-2.16547	NA	-2.25626	-2.13527	0.649447	0.830636	NA	-0.347293	-2.18566	0.377597	2.56326	0.00123025	0.00492101
22	REV__sp|Q07283|TRHY_HUMAN	REV__sp|Q07283|TRHY_HUMAN	3	sp|Q07283|TRHY_HUMAN Trichohyalin OS=Homo sapiens GN=TCHH PE=1 SV=2	-1.72935	0.831977	REV__sp|Q07283|TRHY_HUMAN	2.56133	1.31148	3.81118	-0.265734	4.59582	0.00111367	0.00458256	-0.582635	1	1773500	1277400	1121900	NA	20768000	20303000	17228000	13671000	-0.651039	-2.2649	-2.27211	NA	1.28709	0.522355	0.558591	0.959874	-1.72935	0.831977	2.56133	0.00111367	0.00458256
2358	sp|Q9P281|BAHC1_HUMAN	sp|Q9P281|BAHC1_HUMAN	9	sp|Q9P281|BAHC1_HUMAN BAH and coiled-coil domain-containing protein 1 OS=Homo sapiens GN=BAHCC1 PE=1 SV=3	NA	-2.73725	sp|Q9P281|BAHC1_HUMAN	NA	NA	NA	-2.73725	NA	NA	NA	NA	4	NA	NA	NA	NA	890100	743290	6186800	764500	NA	NA	NA	NA	-2.95695	-4.14341	-0.863921	-2.98473	-5.2973	-2.73725	2.56005	0	0
539	sp|P24928|RPB1_HUMAN	sp|P24928|RPB1_HUMAN	6	sp|P24928|RPB1_HUMAN DNA-directed RNA polymerase II subunit RPB1 OS=Homo sapiens GN=POLR2A PE=1 SV=2	-4.7353	-2.18401	sp|P24928|RPB1_HUMAN	2.55129	-0.259772	5.36235	-3.27742	2.03538	0.0705188	0.124849	-4.62084	1	1093000	68919	80670	NA	6044400	1110500	1461900	1670900	-1.37027	-6.54091	-6.29473	NA	-0.375964	-3.57705	-2.86782	-1.91522	-4.7353	-2.18401	2.55129	0.0705188	0.124849
2438	sp|Q9ULG1|INO80_HUMAN	sp|Q9ULG1|INO80_HUMAN	3	sp|Q9ULG1|INO80_HUMAN DNA helicase INO80 OS=Homo sapiens GN=INO80 PE=1 SV=2	-4.24466	-1.69752	sp|Q9ULG1|INO80_HUMAN	2.54714	0.30092	4.79337	-2.20695	2.64264	0.031141	0.06556	-3.49115	3	NA	NA	NA	1861000	1354000	10776000	3438600	1218300	NA	NA	NA	-4.24466	-2.39175	-0.371242	-1.67976	-2.34733	-4.24466	-1.69752	2.54714	0.031141	0.06556
1777	sp|Q92540|SMG7_HUMAN	sp|Q92540|SMG7_HUMAN	10	sp|Q92540|SMG7_HUMAN Protein SMG7 OS=Homo sapiens GN=SMG7 PE=1 SV=2	-2.01171	0.533323	sp|Q92540|SMG7_HUMAN	2.54503	1.18569	3.90437	-0.557405	4.19875	0.00202973	0.00723589	-1.17654	1	429430	2729800	NA	7123300	7860400	17686000	38125000	7649600	-2.75846	-1.15271	NA	-2.12396	-0.0219982	0.327687	1.66193	0.165672	-2.01171	0.533323	2.54503	0.00202973	0.00723589
1599	sp|Q86YT6|MIB1_HUMAN	sp|Q86YT6|MIB1_HUMAN	4	sp|Q86YT6|MIB1_HUMAN E3 ubiquitin-protein ligase MIB1 OS=Homo sapiens GN=MIB1 PE=1 SV=1	-4.29057	-1.75302	sp|Q86YT6|MIB1_HUMAN	2.53755	0.990319	4.08478	-2.84055	3.67804	0.0046072	0.0139936	-1.98767	1	NA	254890	257280	2587600	3238600	8879100	969720	1937100	NA	-4.62541	-4.52243	-3.72388	-1.21672	-0.644381	-3.43799	-1.71301	-4.29057	-1.75302	2.53755	0.0046072	0.0139936
2551	sp|Q9Y4C1|KDM3A_HUMAN	sp|Q9Y4C1|KDM3A_HUMAN	15	sp|Q9Y4C1|KDM3A_HUMAN Lysine-specific demethylase 3A OS=Homo sapiens GN=KDM3A PE=1 SV=4	-3.39569	-0.864437	sp|Q9Y4C1|KDM3A_HUMAN	2.53125	0.944774	4.11774	-1.70819	3.63882	0.00590306	0.016948	-2.09685	2	NA	573110	NA	3273000	5432000	10039000	9776300	1319400	NA	-3.43875	NA	-3.35263	-0.519898	-0.47118	-0.228388	-2.23828	-3.39569	-0.864437	2.53125	0.00590306	0.016948
2062	sp|Q9BWF3|RBM4_HUMAN	sp|Q9BWF3|RBM4_HUMAN	18	sp|Q9BWF3|RBM4_HUMAN RNA-binding protein 4 OS=Homo sapiens GN=RBM4 PE=1 SV=1	0.13074	2.65678	sp|Q9BWF3|RBM4_HUMAN	2.52604	1.5266	3.52548	1.39376	5.59233	0.000189444	0.00129216	1.07181	0	2636900	8656800	7128500	19829000	36138000	108710000	100950000	48424000	-0.0616477	0.537571	0.553485	-0.506448	2.03345	2.88937	3.01449	2.68981	0.13074	2.65678	2.52604	0.000189444	0.00129216
2391	sp|Q9UHA3|RLP24_HUMAN	sp|Q9UHA3|RLP24_HUMAN	2	sp|Q9UHA3|RLP24_HUMAN Probable ribosome biogenesis protein RLP24 OS=Homo sapiens GN=RSL24D1 PE=1 SV=1	-3.36201	-0.841218	sp|Q9UHA3|RLP24_HUMAN	2.5208	1.32108	3.72051	-1.92156	4.7121	0.00093814	0.00404016	-0.413175	1	234850	NA	433380	4930700	3705300	8974600	3749600	6114300	-3.65523	NA	-3.72559	-2.70521	-1.03533	-0.629289	-1.55949	-0.140757	-3.36201	-0.841218	2.5208	0.00093814	0.00404016
1980	sp|Q99504|EYA3_HUMAN	sp|Q99504|EYA3_HUMAN	6	sp|Q99504|EYA3_HUMAN Eyes absent homolog 3 OS=Homo sapiens GN=EYA3 PE=1 SV=3	-1.36641	1.15344	sp|Q99504|EYA3_HUMAN	2.51985	1.35025	3.68945	-0.106482	4.76701	0.00065613	0.00312181	-0.158034	0	580420	3803900	1532000	17631000	11144000	33631000	42245000	15444000	-2.31076	-0.666765	-1.79603	-0.692072	0.448326	1.2343	1.80446	1.12667	-1.36641	1.15344	2.51985	0.00065613	0.00312181
801	sp|P51970|NDUA8_HUMAN	sp|P51970|NDUA8_HUMAN	5	sp|P51970|NDUA8_HUMAN NADH dehydrogenase [ubiquinone] 1 alpha subcomplex subunit 8 OS=Homo sapiens GN=NDUFA8 PE=1 SV=3	-3.60713	-1.08886	sp|P51970|NDUA8_HUMAN	2.51827	0.694261	4.34228	-2.52787	3.09622	0.0119479	0.0300608	-2.9253	1	65434	451920	1741200	3005600	NA	6936500	4963700	3023500	-5.55411	-3.78669	-1.60043	-3.48729	NA	-0.992684	-1.16987	-1.10401	-3.60713	-1.08886	2.51827	0.0119479	0.0300608
665	sp|P39880|CUX1_HUMAN	sp|P39880|CUX1_HUMAN	17	sp|P39880|CUX1_HUMAN Homeobox protein cut-like 1 OS=Homo sapiens GN=CUX1 PE=1 SV=3	-3.30228	-0.786049	sp|P39880|CUX1_HUMAN	2.51624	0.0853725	4.9471	-1.86444	2.32138	0.0438313	0.0858439	-4.17755	1	NA	1013200	570260	2177600	42712000	10187000	2455600	871930	NA	-2.60425	-3.30616	-3.99644	2.25865	-0.450535	-2.14743	-2.80487	-3.30228	-0.786049	2.51624	0.0438313	0.0858439
1429	sp|Q5VVJ2|MYSM1_HUMAN	sp|Q5VVJ2|MYSM1_HUMAN	5	sp|Q5VVJ2|MYSM1_HUMAN Histone H2A deubiquitinase MYSM1 OS=Homo sapiens GN=MYSM1 PE=1 SV=1	-5.45771	-2.94201	sp|Q5VVJ2|MYSM1_HUMAN	2.5157	0.263512	4.76788	-3.78058	2.5475	0.0325862	0.0681163	-3.75702	2	75526	NA	NA	802080	5166500	1570800	519190	425250	-5.34097	NA	NA	-5.57445	-0.587418	-3.08786	-4.30576	-3.78703	-5.45771	-2.94201	2.5157	0.0325862	0.0681163
1392	sp|Q5JSZ5|PRC2B_HUMAN	sp|Q5JSZ5|PRC2B_HUMAN	73	sp|Q5JSZ5|PRC2B_HUMAN Protein PRRC2B OS=Homo sapiens GN=PRRC2B PE=1 SV=2	2.41183	4.92205	sp|Q5JSZ5|PRC2B_HUMAN	2.51022	1.49301	3.52743	3.66694	5.46024	0.000229615	0.00145907	0.882024	0	12564000	34390000	14026000	212860000	276500000	511830000	446940000	219480000	2.25823	2.55782	1.58773	3.24355	4.7752	5.07496	5.08106	4.75699	2.41183	4.92205	2.51022	0.000229615	0.00145907
2011	sp|Q9BQ04|RBM4B_HUMAN	sp|Q9BQ04|RBM4B_HUMAN	15	sp|Q9BQ04|RBM4B_HUMAN RNA-binding protein 4B OS=Homo sapiens GN=RBM4B PE=1 SV=1	-4.61622	-2.12159	sp|Q9BQ04|RBM4B_HUMAN	2.49463	0.718875	4.27039	-2.62052	3.27387	0.0122443	0.0306756	-2.61231	3	NA	NA	NA	1471000	2199500	2053300	2413900	1730700	NA	NA	NA	-4.61622	-1.73804	-2.70998	-2.17122	-1.86712	-4.61622	-2.12159	2.49463	0.0122443	0.0306756
306	sp|O95251|KAT7_HUMAN	sp|O95251|KAT7_HUMAN	8	sp|O95251|KAT7_HUMAN Histone acetyltransferase KAT7 OS=Homo sapiens GN=KAT7 PE=1 SV=1	-2.97595	-0.483957	sp|O95251|KAT7_HUMAN	2.49199	1.00941	3.97458	-1.55195	3.7695	0.00397939	0.0124365	-1.84286	1	NA	1262700	571910	3290400	6753800	24625000	6946800	1816400	NA	-2.28185	-3.30175	-3.34426	-0.22644	0.794609	-0.702985	-1.80101	-2.97595	-0.483957	2.49199	0.00397939	0.0124365
603	sp|P31689|DNJA1_HUMAN	sp|P31689|DNJA1_HUMAN	12	sp|P31689|DNJA1_HUMAN DnaJ homolog subfamily A member 1 OS=Homo sapiens GN=DNAJA1 PE=1 SV=2	-0.228231	2.25934	sp|P31689|DNJA1_HUMAN	2.48758	1.44541	3.52974	1.01556	5.2814	0.000299081	0.00176458	0.620758	0	1442600	5224000	5479000	29030000	22874000	81794000	71102000	45495000	-0.957895	-0.202153	0.151319	0.0958044	1.41723	2.48806	2.52762	2.60447	-0.228231	2.25934	2.48758	0.000299081	0.00176458
2473	sp|Q9UPP1|PHF8_HUMAN	sp|Q9UPP1|PHF8_HUMAN	11	sp|Q9UPP1|PHF8_HUMAN Histone lysine demethylase PHF8 OS=Homo sapiens GN=PHF8 PE=1 SV=3	-2.69803	-0.212685	sp|Q9UPP1|PHF8_HUMAN	2.48535	0.910001	4.0607	-1.27783	3.53808	0.00577591	0.0166844	-2.21089	1	NA	936410	343060	12063000	6385900	6559500	12571000	9091200	NA	-2.71968	-4.08273	-1.29169	-0.301911	-1.07152	0.120853	0.401835	-2.69803	-0.212685	2.48535	0.00577591	0.0166844
2063	sp|Q9BWG6|SCNM1_HUMAN	sp|Q9BWG6|SCNM1_HUMAN	2	sp|Q9BWG6|SCNM1_HUMAN Sodium channel modifier 1 OS=Homo sapiens GN=SCNM1 PE=1 SV=1	-3.68671	-1.20585	sp|Q9BWG6|SCNM1_HUMAN	2.48085	1.27363	3.68808	-2.44628	4.54697	0.000928785	0.0040219	-0.503161	0	215850	988390	432090	1490400	2530800	4440400	10091000	2316900	-3.78059	-2.64056	-3.73015	-4.59552	-1.54899	-1.62193	-0.18438	-1.46811	-3.68671	-1.20585	2.48085	0.000928785	0.0040219
479	sp|P17028|ZNF24_HUMAN	sp|P17028|ZNF24_HUMAN	17	sp|P17028|ZNF24_HUMAN Zinc finger protein 24 OS=Homo sapiens GN=ZNF24 PE=1 SV=4	0.285964	2.76254	sp|P17028|ZNF24_HUMAN	2.47658	1.12242	3.83074	1.52425	4.0466	0.00209783	0.00744493	-1.31238	0	1340100	11578000	5138500	58194000	38865000	82072000	189180000	43368000	-1.06741	0.96341	0.0532734	1.19459	2.13147	2.49284	3.88689	2.53897	0.285964	2.76254	2.47658	0.00209783	0.00744493
1472	sp|Q6P1R3|MSD2_HUMAN	sp|Q6P1R3|MSD2_HUMAN	7	sp|Q6P1R3|MSD2_HUMAN Myb/SANT-like DNA-binding domain-containing protein 2 OS=Homo sapiens GN=MSANTD2 PE=1 SV=1	-2.17517	0.295919	sp|Q6P1R3|MSD2_HUMAN	2.47109	1.36746	3.57472	-0.939624	4.9542	0.000490827	0.0025525	0.130005	0	766560	1010200	994880	9089100	13300000	9624900	26585000	6146800	-1.89743	-2.6086	-2.45572	-1.73892	0.686628	-0.530604	1.16116	-0.133505	-2.17517	0.295919	2.47109	0.000490827	0.0025525
1090	sp|Q12834|CDC20_HUMAN	sp|Q12834|CDC20_HUMAN	13	sp|Q12834|CDC20_HUMAN Cell division cycle protein 20 homolog OS=Homo sapiens GN=CDC20 PE=1 SV=2	-1.77043	0.696129	sp|Q12834|CDC20_HUMAN	2.46656	1.22438	3.70873	-0.537149	4.39356	0.00118813	0.00481196	-0.747809	0	565330	1777300	1282300	15627000	5220300	37082000	18302000	18094000	-2.3499	-1.7812	-2.06791	-0.882706	-0.57346	1.3721	0.64259	1.34328	-1.77043	0.696129	2.46656	0.00118813	0.00481196
237	sp|O75367|H2AY_HUMAN	sp|O75367|H2AY_HUMAN	17	sp|O75367|H2AY_HUMAN Core histone macro-H2A.1 OS=Homo sapiens GN=H2AFY PE=1 SV=4	2.81226	5.27445	sp|O75367|H2AY_HUMAN	2.46219	1.50658	3.4178	4.04335	5.70097	0.000162027	0.00116937	1.22587	0	15428000	41102000	50794000	118080000	367840000	714630000	445510000	330180000	2.56336	2.81894	3.5542	2.31253	5.15979	5.54581	5.07661	5.31558	2.81226	5.27445	2.46219	0.000162027	0.00116937
985	sp|P78527|PRKDC_HUMAN	sp|P78527|PRKDC_HUMAN	16	sp|P78527|PRKDC_HUMAN DNA-dependent protein kinase catalytic subunit OS=Homo sapiens GN=PRKDC PE=1 SV=3	-2.87832	-0.419542	sp|P78527|PRKDC_HUMAN	2.45878	0.484325	4.43323	-1.4733	2.79273	0.0198506	0.0457495	-3.41955	1	119220	NA	547590	18640000	10026000	12870000	5713900	3538300	-4.66266	NA	-3.36815	-0.604146	0.305881	-0.120735	-0.974369	-0.888945	-2.87832	-0.419542	2.45878	0.0198506	0.0457495
2379	sp|Q9UEG4|ZN629_HUMAN	sp|Q9UEG4|ZN629_HUMAN	12	sp|Q9UEG4|ZN629_HUMAN Zinc finger protein 629 OS=Homo sapiens GN=ZNF629 PE=1 SV=2	-2.07612	0.382347	sp|Q9UEG4|ZN629_HUMAN	2.45847	0.520717	4.39623	-0.846889	2.80721	0.0176994	0.0416872	-3.40858	0	699160	786560	503710	31020000	5594300	7169200	44405000	14948000	-2.03419	-2.97508	-3.49579	0.200559	-0.48023	-0.946136	1.87373	1.08202	-2.07612	0.382347	2.45847	0.0176994	0.0416872
2266	sp|Q9NRZ9|HELLS_HUMAN	sp|Q9NRZ9|HELLS_HUMAN	9	sp|Q9NRZ9|HELLS_HUMAN Lymphoid-specific helicase OS=Homo sapiens GN=HELLS PE=1 SV=1	-3.9257	-1.46755	sp|Q9NRZ9|HELLS_HUMAN	2.45815	-0.727668	5.64396	-2.52105	1.73039	0.115691	0.185609	-5.06806	1	12323	1951100	NA	7243300	4911700	3134800	9852500	822950	-8.03498	-1.64456	NA	-2.09757	-0.655563	-2.1131	-0.217604	-2.88395	-3.9257	-1.46755	2.45815	0.115691	0.185609
1491	sp|Q6UN15|FIP1_HUMAN	sp|Q6UN15|FIP1_HUMAN	14	sp|Q6UN15|FIP1_HUMAN Pre-mRNA 3-end-processing factor FIP1 OS=Homo sapiens GN=FIP1L1 PE=1 SV=1	1.12018	3.57645	sp|Q6UN15|FIP1_HUMAN	2.45627	1.33189	3.58066	2.34831	4.8336	0.00059142	0.00290177	-0.0549677	0	6783800	8253300	6315900	117300000	125970000	158950000	140710000	100520000	1.34246	0.467665	0.368537	2.30206	3.71593	3.4253	3.47574	3.68883	1.12018	3.57645	2.45627	0.00059142	0.00290177
1596	sp|Q86Y91|KI18B_HUMAN	sp|Q86Y91|KI18B_HUMAN	3	sp|Q86Y91|KI18B_HUMAN Kinesin-like protein KIF18B OS=Homo sapiens GN=KIF18B PE=1 SV=3	-4.16544	-1.70923	sp|Q86Y91|KI18B_HUMAN	2.45621	1.28598	3.62644	-2.76189	4.70707	0.000945081	0.00404859	-0.420455	1	137460	235400	NA	3376800	2898700	4955800	2617600	1634800	-4.45112	-4.74191	NA	-3.3033	-1.36612	-1.46701	-2.05869	-1.94509	-4.16544	-1.70923	2.45621	0.000945081	0.00404859
819	sp|P52948|NUP98_HUMAN	sp|P52948|NUP98_HUMAN	25	sp|P52948|NUP98_HUMAN Nuclear pore complex protein Nup98-Nup96 OS=Homo sapiens GN=NUP98 PE=1 SV=4	1.51331	3.96544	sp|P52948|NUP98_HUMAN	2.45212	1.22795	3.67629	2.73937	4.4321	0.00111651	0.00458256	-0.686042	0	6271300	12610000	9827100	150420000	80673000	263400000	169470000	239150000	1.22573	1.08846	1.04407	2.69498	3.11548	4.13781	3.73406	4.87439	1.51331	3.96544	2.45212	0.00111651	0.00458256
1662	sp|Q8N684|CPSF7_HUMAN	sp|Q8N684|CPSF7_HUMAN	18	sp|Q8N684|CPSF7_HUMAN Cleavage and polyadenylation specificity factor subunit 7 OS=Homo sapiens GN=CPSF7 PE=1 SV=1	2.60454	5.0473	sp|Q8N684|CPSF7_HUMAN	2.44277	1.42202	3.46351	3.82592	5.29507	0.000293051	0.00173769	0.640907	0	11030000	38923000	27169000	184330000	186750000	470860000	560370000	403620000	2.06474	2.73916	2.59806	3.01618	4.24643	4.95727	5.39521	5.59029	2.60454	5.0473	2.44277	0.000293051	0.00173769
418	sp|P09874|PARP1_HUMAN	sp|P09874|PARP1_HUMAN	74	sp|P09874|PARP1_HUMAN Poly [ADP-ribose] polymerase 1 OS=Homo sapiens GN=PARP1 PE=1 SV=4	6.137	8.57812	sp|P09874|PARP1_HUMAN	2.44112	1.38585	3.49639	7.35756	5.11839	0.000382068	0.00213163	0.378315	0	170730000	245420000	482140000	1205700000	2933800000	8284400000	5528000000	4149700000	6.13538	5.43599	6.99315	5.98347	7.95752	9.00251	8.57464	8.7778	6.137	8.57812	2.44112	0.000382068	0.00213163
1110	sp|Q12996|CSTF3_HUMAN	sp|Q12996|CSTF3_HUMAN	16	sp|Q12996|CSTF3_HUMAN Cleavage stimulation factor subunit 3 OS=Homo sapiens GN=CSTF3 PE=1 SV=1	-1.37048	1.06783	sp|Q12996|CSTF3_HUMAN	2.43832	1.34311	3.53352	-0.151326	4.92611	0.000512515	0.00261804	0.0871184	0	582750	2335800	2453600	17324000	10213000	35726000	35199000	14817000	-2.30481	-1.38099	-1.07631	-0.719825	0.33078	1.31955	1.55101	1.06998	-1.37048	1.06783	2.43832	0.000512515	0.00261804
1082	sp|Q10570|CPSF1_HUMAN	sp|Q10570|CPSF1_HUMAN	30	sp|Q10570|CPSF1_HUMAN Cleavage and polyadenylation specificity factor subunit 1 OS=Homo sapiens GN=CPSF1 PE=1 SV=2	0.252513	2.68324	sp|Q10570|CPSF1_HUMAN	2.43073	1.29805	3.56341	1.46788	4.74828	0.000675643	0.00315713	-0.187129	0	2310400	5440200	6138800	54322000	124420000	65223000	73828000	36023000	-0.258063	-0.142761	0.325076	1.0858	3.69925	2.16869	2.57988	2.28515	0.252513	2.68324	2.43073	0.000675643	0.00315713
517	sp|P21796|VDAC1_HUMAN	sp|P21796|VDAC1_HUMAN	8	sp|P21796|VDAC1_HUMAN Voltage-dependent anion-selective channel protein 1 OS=Homo sapiens GN=VDAC1 PE=1 SV=2	-0.668018	1.75562	sp|P21796|VDAC1_HUMAN	2.42364	0.0564116	4.79086	0.370683	2.29607	0.0457285	0.0889236	-4.21748	1	421010	2690800	25814000	12541000	25871000	48724000	46123000	NA	-2.78788	-1.17378	2.51988	-1.23029	1.58312	1.75728	1.92646	NA	-0.668018	1.75562	2.42364	0.0457285	0.0889236
2258	sp|Q9NRA8|4ET_HUMAN	sp|Q9NRA8|4ET_HUMAN	17	sp|Q9NRA8|4ET_HUMAN Eukaryotic translation initiation factor 4E transporter OS=Homo sapiens GN=EIF4ENIF1 PE=1 SV=2	0.269908	2.68327	sp|Q9NRA8|4ET_HUMAN	2.41337	1.24686	3.57987	1.47659	4.57766	0.000884481	0.00389436	-0.45461	0	3043200	5440400	3676000	71939000	40050000	122120000	105520000	40097000	0.151294	-0.142707	-0.458546	1.52959	2.17194	3.05346	3.07599	2.43171	0.269908	2.68327	2.41337	0.000884481	0.00389436
1194	sp|Q14186|TFDP1_HUMAN	sp|Q14186|TFDP1_HUMAN	10	sp|Q14186|TFDP1_HUMAN Transcription factor Dp-1 OS=Homo sapiens GN=TFDP1 PE=1 SV=1	-0.944516	1.46649	sp|Q14186|TFDP1_HUMAN	2.41101	1.12784	3.69418	0.260987	4.15742	0.00174652	0.00646958	-1.13045	0	579830	2455200	3823800	31814000	16617000	43504000	45282000	18600000	-2.31227	-1.30798	-0.398309	0.240491	0.98664	1.59742	1.90089	1.38101	-0.944516	1.46649	2.41101	0.00174652	0.00646958
1219	sp|Q14692|BMS1_HUMAN	sp|Q14692|BMS1_HUMAN	22	sp|Q14692|BMS1_HUMAN Ribosome biogenesis protein BMS1 homolog OS=Homo sapiens GN=BMS1 PE=1 SV=1	-0.99377	1.41223	sp|Q14692|BMS1_HUMAN	2.406	0.344824	4.46718	0.209231	2.58279	0.0262451	0.0567722	-3.78729	0	196390	2746800	6838000	39933000	30560000	70491000	15136000	16109000	-3.92098	-1.14361	0.489907	0.599609	1.80756	2.27826	0.37877	1.18434	-0.99377	1.41223	2.406	0.0262451	0.0567722
1132	sp|Q13242|SRSF9_HUMAN	sp|Q13242|SRSF9_HUMAN	17	sp|Q13242|SRSF9_HUMAN Serine/arginine-rich splicing factor 9 OS=Homo sapiens GN=SRSF9 PE=1 SV=1	1.40388	3.80906	sp|Q13242|SRSF9_HUMAN	2.40518	1.10773	3.70264	2.60647	4.1017	0.00191474	0.00690947	-1.22174	0	3111800	10903000	27566000	93009000	102580000	221020000	134040000	181680000	0.184418	0.875435	2.62023	1.93545	3.43918	3.89035	3.40829	4.49844	1.40388	3.80906	2.40518	0.00191474	0.00690947
1493	sp|Q6UVJ0|SAS6_HUMAN	sp|Q6UVJ0|SAS6_HUMAN	13	sp|Q6UVJ0|SAS6_HUMAN Spindle assembly abnormal protein 6 homolog OS=Homo sapiens GN=SASS6 PE=1 SV=1	-2.52465	-0.120377	sp|Q6UVJ0|SAS6_HUMAN	2.40427	0.48822	4.32032	-1.32251	2.77642	0.018683	0.0434831	-3.46082	0	623880	191000	1005700	21105000	12009000	20906000	5617900	4382400	-2.20347	-5.04802	-2.43919	-0.407915	0.54905	0.563642	-0.997905	-0.596295	-2.52465	-0.120377	2.40427	0.018683	0.0434831
710	sp|P46108|CRK_HUMAN	sp|P46108|CRK_HUMAN	22	sp|P46108|CRK_HUMAN Adapter molecule crk OS=Homo sapiens GN=CRK PE=1 SV=2	3.1746	5.5718	sp|P46108|CRK_HUMAN	2.39721	1.32197	3.47245	4.3732	4.93297	0.000507126	0.00259613	0.0976033	0	21607000	44632000	29135000	341430000	268230000	746370000	750780000	605160000	3.06387	2.93961	2.70482	3.99009	4.73429	5.60711	5.80152	6.1443	3.1746	5.5718	2.39721	0.000507126	0.00259613
1360	sp|Q49AJ0|F135B_HUMAN;sp|Q9P2D6|F135A_HUMAN	sp|Q49AJ0|F135B_HUMAN	2	sp|Q49AJ0|F135B_HUMAN Protein FAM135B OS=Homo sapiens GN=FAM135B PE=2 SV=2;sp|Q9P2D6|F135A_HUMAN Protein FAM135A OS=Homo sapiens GN=FAM135A PE=1 SV=2	-4.89344	-2.49745	sp|Q49AJ0|F135B_HUMAN	2.39599	1.04397	3.74801	-3.69544	4.04167	0.00325128	0.0106392	-1.54162	2	NA	120950	237330	1777300	1854300	2255900	NA	785860	NA	-5.71717	-4.64577	-4.31737	-1.96807	-2.57724	NA	-2.94703	-4.89344	-2.49745	2.39599	0.00325128	0.0106392
1436	sp|Q5VZL5|ZMYM4_HUMAN	sp|Q5VZL5|ZMYM4_HUMAN	24	sp|Q5VZL5|ZMYM4_HUMAN Zinc finger MYM-type protein 4 OS=Homo sapiens GN=ZMYM4 PE=1 SV=1	-0.985154	1.41057	sp|Q5VZL5|ZMYM4_HUMAN	2.39572	0.999335	3.79211	0.212708	3.79611	0.00319212	0.0105215	-1.72857	0	3288200	1781100	1798400	15675000	62132000	32868000	15272000	17346000	0.26635	-1.77807	-1.55104	-0.877861	2.76362	1.20193	0.391194	1.28554	-0.985154	1.41057	2.39572	0.00319212	0.0105215
1961	sp|Q96SI1|KCD15_HUMAN	sp|Q96SI1|KCD15_HUMAN	5	sp|Q96SI1|KCD15_HUMAN BTB/POZ domain-containing protein KCTD15 OS=Homo sapiens GN=KCTD15 PE=1 SV=1	-5.31761	-2.92416	sp|Q96SI1|KCD15_HUMAN	2.39345	0.737736	4.04917	-3.72198	3.29685	0.00995807	0.025797	-2.6086	2	141330	NA	84416	NA	763680	3537800	903360	726560	-4.40986	NA	-6.22537	NA	-3.16335	-1.94249	-3.53645	-3.05435	-5.31761	-2.92416	2.39345	0.00995807	0.025797
1647	sp|Q8N3J3|CQ053_HUMAN	sp|Q8N3J3|CQ053_HUMAN	6	sp|Q8N3J3|CQ053_HUMAN Uncharacterized protein C17orf53 OS=Homo sapiens GN=C17orf53 PE=1 SV=1	-3.05618	-0.663933	sp|Q8N3J3|CQ053_HUMAN	2.39224	0.65373	4.13076	-1.86005	3.04464	0.0116698	0.0294868	-3.00414	0	278690	1033500	400710	5969200	764830	11196000	16153000	8777500	-3.40091	-2.5752	-3.84536	-2.40323	-3.16133	-0.317304	0.469097	0.353802	-3.05618	-0.663933	2.39224	0.0116698	0.0294868
265	sp|O75683|SURF6_HUMAN	sp|O75683|SURF6_HUMAN	5	sp|O75683|SURF6_HUMAN Surfeit locus protein 6 OS=Homo sapiens GN=SURF6 PE=1 SV=3	-3.09493	-0.713543	sp|O75683|SURF6_HUMAN	2.38139	0.173748	4.58903	-2.14238	2.51385	0.0378372	0.0767108	-3.81278	3	NA	284420	574920	10399000	7531300	5394100	NA	NA	NA	-4.46486	-3.29373	-1.52621	-0.0796256	-1.34746	NA	NA	-3.09493	-0.713543	2.38139	0.0378372	0.0767108
1653	sp|Q8N5C6|SRBD1_HUMAN	sp|Q8N5C6|SRBD1_HUMAN	12	sp|Q8N5C6|SRBD1_HUMAN S1 RNA-binding domain-containing protein 1 OS=Homo sapiens GN=SRBD1 PE=1 SV=2	-3.93637	-1.5614	sp|Q8N5C6|SRBD1_HUMAN	2.37498	0.191256	4.5587	-2.74888	2.4804	0.0362897	0.0742251	-3.90599	2	NA	1343000	143310	1913200	NA	2150500	10826000	1625700	NA	-2.19155	-5.41661	-4.20096	NA	-2.64474	-0.0867234	-1.95273	-3.93637	-1.5614	2.37498	0.0362897	0.0742251
2332	sp|Q9NYZ3|GTSE1_HUMAN	sp|Q9NYZ3|GTSE1_HUMAN	21	sp|Q9NYZ3|GTSE1_HUMAN G2 and S phase-expressed protein 1 OS=Homo sapiens GN=GTSE1 PE=1 SV=3	0.0999756	2.47474	sp|Q9NYZ3|GTSE1_HUMAN	2.37476	1.22091	3.52861	1.28736	4.55386	0.00091864	0.00398527	-0.49225	0	2754900	3465600	5012400	57819000	33515000	103580000	54375000	60342000	0.00340196	-0.803176	0.0153054	1.18437	1.93192	2.82118	2.15508	2.99078	0.0999756	2.47474	2.37476	0.00091864	0.00398527
2233	sp|Q9NPF5|DMAP1_HUMAN	sp|Q9NPF5|DMAP1_HUMAN	16	sp|Q9NPF5|DMAP1_HUMAN DNA methyltransferase 1-associated protein 1 OS=Homo sapiens GN=DMAP1 PE=1 SV=1	-0.163383	2.20797	sp|Q9NPF5|DMAP1_HUMAN	2.37135	1.1041	3.63861	1.02229	4.1404	0.0017962	0.00657216	-1.1583	0	818870	7484900	5495200	41632000	48023000	71304000	41021000	37973000	-1.79934	0.32454	0.155831	0.665439	2.41656	2.29444	1.76363	2.35726	-0.163383	2.20797	2.37135	0.0017962	0.00657216
2474	sp|Q9UPQ9|TNR6B_HUMAN	sp|Q9UPQ9|TNR6B_HUMAN	49	sp|Q9UPQ9|TNR6B_HUMAN Trinucleotide repeat-containing gene 6B protein OS=Homo sapiens GN=TNRC6B PE=1 SV=4	1.52082	3.89166	sp|Q9UPQ9|TNR6B_HUMAN	2.37084	1.41313	3.32855	2.70624	5.47742	0.00022391	0.00144392	0.90687	0	6722000	22045000	8994100	93227000	105910000	268770000	214020000	113910000	1.32886	1.90656	0.908722	1.93915	3.48222	4.16629	4.05825	3.85988	1.52082	3.89166	2.37084	0.00022391	0.00144392
241	sp|O75390|CISY_HUMAN	sp|O75390|CISY_HUMAN	5	sp|O75390|CISY_HUMAN Citrate synthase, mitochondrial OS=Homo sapiens GN=CS PE=1 SV=2	-5.75701	-3.39031	sp|O75390|CISY_HUMAN	2.3667	0.101017	4.63238	-4.57366	2.31128	0.0421552	0.0832064	-4.23635	0	128450	93350	93602	502850	272360	1438400	10496000	107590	-4.55185	-6.09652	-6.06752	-6.31215	-4.55254	-3.21207	-0.129722	-5.66692	-5.75701	-3.39031	2.3667	0.0421552	0.0832064
371	sp|P05204|HMGN2_HUMAN	sp|P05204|HMGN2_HUMAN	5	sp|P05204|HMGN2_HUMAN Non-histone chromosomal protein HMG-17 OS=Homo sapiens GN=HMGN2 PE=1 SV=3	2.20844	4.57237	sp|P05204|HMGN2_HUMAN	2.36393	1.1507	3.57716	3.3904	4.31123	0.00135778	0.00529646	-0.880396	0	16784000	15555000	40106000	73159000	170970000	398850000	550340000	132700000	2.68854	1.39586	3.19318	1.55616	4.12748	4.72313	5.37013	4.06873	2.20844	4.57237	2.36393	0.00135778	0.00529646
82	sp|O00483|NDUA4_HUMAN	sp|O00483|NDUA4_HUMAN	2	sp|O00483|NDUA4_HUMAN Cytochrome c oxidase subunit NDUFA4 OS=Homo sapiens GN=NDUFA4 PE=1 SV=1	-4.89161	-2.52793	sp|O00483|NDUA4_HUMAN	2.36368	0.822072	3.90528	-3.70977	3.49683	0.00732175	0.0201775	-2.34359	2	56289	260960	296410	NA	725530	1840100	3951200	NA	-5.7778	-4.59094	-4.30608	NA	-3.2324	-2.86464	-1.48675	NA	-4.89161	-2.52793	2.36368	0.00732175	0.0201775
1348	sp|Q2TBE0|C19L2_HUMAN	sp|Q2TBE0|C19L2_HUMAN	20	sp|Q2TBE0|C19L2_HUMAN CWF19-like protein 2 OS=Homo sapiens GN=CWF19L2 PE=1 SV=4	-0.7921	1.56567	sp|Q2TBE0|C19L2_HUMAN	2.35777	0.654374	4.06117	0.386785	3.06263	0.011308	0.0286719	-2.97342	0	622380	3017800	1749700	77021000	13749000	47161000	47843000	26068000	-2.20704	-1.00581	-1.59299	1.63744	0.731364	1.71128	1.97731	1.84272	-0.7921	1.56567	2.35777	0.011308	0.0286719
1195	sp|Q14191|WRN_HUMAN	sp|Q14191|WRN_HUMAN	3	sp|Q14191|WRN_HUMAN Werner syndrome ATP-dependent helicase OS=Homo sapiens GN=WRN PE=1 SV=2	-7.84771	-5.49303	sp|Q14191|WRN_HUMAN	2.35467	-0.19664	4.90599	-5.96397	2.15082	0.0657317	0.118147	-4.18421	3	NA	NA	NA	190260	282330	279080	369850	35963	NA	NA	NA	-7.84771	-4.5041	-5.5253	-4.77687	-7.16586	-7.84771	-5.49303	2.35467	0.0657317	0.118147
1249	sp|Q15047|SETB1_HUMAN	sp|Q15047|SETB1_HUMAN	4	sp|Q15047|SETB1_HUMAN Histone-lysine N-methyltransferase SETDB1 OS=Homo sapiens GN=SETDB1 PE=1 SV=1	-4.02888	-1.67507	sp|Q15047|SETB1_HUMAN	2.35381	0.540662	4.16695	-3.24428	2.96073	0.016859	0.0402297	-3.12159	2	124370	183860	383250	5620100	1640300	NA	NA	2784100	-4.59982	-5.10382	-3.91344	-2.49844	-2.1333	NA	NA	-1.21685	-4.02888	-1.67507	2.35381	0.016859	0.0402297
436	sp|P11498|PYC_HUMAN	sp|P11498|PYC_HUMAN	65	sp|P11498|PYC_HUMAN Pyruvate carboxylase, mitochondrial OS=Homo sapiens GN=PC PE=1 SV=2	6.67084	9.0217	sp|P11498|PYC_HUMAN	2.35087	1.14528	3.55645	7.84627	4.31459	0.0013504	0.00527638	-0.874979	0	159150000	387760000	510830000	3079400000	9531500000	14409000000	5684000000	2612900000	6.03102	6.1059	7.08148	7.46495	9.54515	9.7833	8.61329	8.14507	6.67084	9.0217	2.35087	0.0013504	0.00527638
703	sp|P45973|CBX5_HUMAN	sp|P45973|CBX5_HUMAN	10	sp|P45973|CBX5_HUMAN Chromobox protein homolog 5 OS=Homo sapiens GN=CBX5 PE=1 SV=1	0.571497	2.92102	sp|P45973|CBX5_HUMAN	2.34952	1.41709	3.28195	1.74626	5.57536	0.000194155	0.00131291	1.04759	0	3280400	13685000	7679000	30000000	58675000	128980000	89958000	61315000	0.262822	1.20828	0.667159	0.147734	2.68649	3.13056	2.85436	3.01266	0.571497	2.92102	2.34952	0.000194155	0.00131291
705	sp|P46013|KI67_HUMAN	sp|P46013|KI67_HUMAN	98	sp|P46013|KI67_HUMAN Antigen KI-67 OS=Homo sapiens GN=MKI67 PE=1 SV=2	2.30141	4.64469	sp|P46013|KI67_HUMAN	2.34328	1.18766	3.4989	3.47305	4.48661	0.00102288	0.00433394	-0.59903	0	5165500	37053000	30647000	162700000	178090000	390520000	402670000	221060000	0.937487	2.66705	2.78213	2.81897	4.18246	4.69335	4.93617	4.7668	2.30141	4.64469	2.34328	0.00102288	0.00433394
1246	sp|Q15032|R3HD1_HUMAN	sp|Q15032|R3HD1_HUMAN	4	sp|Q15032|R3HD1_HUMAN R3H domain-containing protein 1 OS=Homo sapiens GN=R3HDM1 PE=1 SV=3	-2.91904	-0.580754	sp|Q15032|R3HD1_HUMAN	2.33828	1.02441	3.65216	-1.36018	4.05884	0.00317127	0.0104674	-1.48825	2	NA	608590	NA	5659900	3661100	12923000	8247100	4086500	NA	-3.35078	NA	-2.4873	-1.0515	-0.114938	-0.464658	-0.691918	-2.91904	-0.580754	2.33828	0.00317127	0.0104674
2145	sp|Q9H3G5|CPVL_HUMAN	sp|Q9H3G5|CPVL_HUMAN	4	sp|Q9H3G5|CPVL_HUMAN Probable serine carboxypeptidase CPVL OS=Homo sapiens GN=CPVL PE=1 SV=2	-2.50958	-0.173433	sp|Q9H3G5|CPVL_HUMAN	2.33614	1.38804	3.28425	-1.34151	5.45195	0.000232421	0.00145907	0.87003	0	673680	894950	849200	5739300	10923000	13309000	7222700	5085500	-2.08935	-2.78601	-2.69767	-2.46528	0.421337	-0.0734184	-0.648887	-0.392764	-2.50958	-0.173433	2.33614	0.000232421	0.00145907
139	sp|O15294|OGT1_HUMAN	sp|O15294|OGT1_HUMAN	26	sp|O15294|OGT1_HUMAN UDP-N-acetylglucosamine--peptide N-acetylglucosaminyltransferase 110 kDa subunit OS=Homo sapiens GN=OGT PE=1 SV=3	0.656048	2.98839	sp|O15294|OGT1_HUMAN	2.33234	1.24248	3.42221	1.82222	4.73509	0.000689765	0.00320726	-0.207667	0	3698200	8228000	6136700	66086000	143670000	114160000	92343000	34132000	0.440956	0.463168	0.324553	1.39552	3.89308	2.95838	2.8907	2.21139	0.656048	2.98839	2.33234	0.000689765	0.00320726
132	sp|O15164|TIF1A_HUMAN	sp|O15164|TIF1A_HUMAN	29	sp|O15164|TIF1A_HUMAN Transcription intermediary factor 1-alpha OS=Homo sapiens GN=TRIM24 PE=1 SV=3	0.93982	3.27165	sp|O15164|TIF1A_HUMAN	2.33183	1.40943	3.25423	2.10574	5.59354	0.000189114	0.00129216	1.07353	0	5211700	14171000	8886200	41460000	134730000	138500000	84772000	74397000	0.950718	1.25938	0.890278	0.658898	3.80651	3.23102	2.77188	3.27719	0.93982	3.27165	2.33183	0.000189114	0.00129216
2158	sp|Q9H583|HEAT1_HUMAN	sp|Q9H583|HEAT1_HUMAN	34	sp|Q9H583|HEAT1_HUMAN HEAT repeat-containing protein 1 OS=Homo sapiens GN=HEATR1 PE=1 SV=3	-1.00358	1.32485	sp|Q9H583|HEAT1_HUMAN	2.32843	0.92379	3.73307	0.160634	3.66781	0.00396878	0.0124222	-1.94407	0	783170	3555800	6899600	8276900	24276000	69464000	16062000	14961000	-1.86558	-0.765545	0.503611	-1.88682	1.49738	2.25756	0.461249	1.08321	-1.00358	1.32485	2.32843	0.00396878	0.0124222
1822	sp|Q92997|DVL3_HUMAN	sp|Q92997|DVL3_HUMAN	18	sp|Q92997|DVL3_HUMAN Segment polarity protein dishevelled homolog DVL-3 OS=Homo sapiens GN=DVL3 PE=1 SV=2	1.57469	3.89876	sp|Q92997|DVL3_HUMAN	2.32407	0.986139	3.662	2.73672	3.84348	0.00294688	0.00986472	-1.64938	0	7054700	9414800	10777000	188620000	67289000	311190000	193670000	173000000	1.40064	0.660503	1.18507	3.05253	2.87106	4.37302	3.91947	4.43148	1.57469	3.89876	2.32407	0.00294688	0.00986472
2214	sp|Q9HCK8|CHD8_HUMAN	sp|Q9HCK8|CHD8_HUMAN	81	sp|Q9HCK8|CHD8_HUMAN Chromodomain-helicase-DNA-binding protein 8 OS=Homo sapiens GN=CHD8 PE=1 SV=5	2.7919	5.10757	sp|Q9HCK8|CHD8_HUMAN	2.31567	1.26236	3.36898	3.94973	4.86439	0.000563818	0.0027954	-0.00753531	0	12356000	43777000	22000000	292800000	384310000	557500000	557710000	199630000	2.23342	2.91128	2.27558	3.74732	5.21881	5.19553	5.3886	4.62732	2.7919	5.10757	2.31567	0.000563818	0.0027954
2102	sp|Q9GZR1|SENP6_HUMAN	sp|Q9GZR1|SENP6_HUMAN	6	sp|Q9GZR1|SENP6_HUMAN Sentrin-specific protease 6 OS=Homo sapiens GN=SENP6 PE=1 SV=2	-3.62032	-1.31184	sp|Q9GZR1|SENP6_HUMAN	2.30848	-0.0229193	4.63988	-2.08133	2.25824	0.051829	0.0978792	-4.19707	2	NA	NA	124350	9879500	3092500	9344800	3226100	2061600	NA	NA	-5.63346	-1.60717	-1.27892	-0.572267	-1.76837	-1.6278	-3.62032	-1.31184	2.30848	0.051829	0.0978792
1162	sp|Q13573|SNW1_HUMAN	sp|Q13573|SNW1_HUMAN	34	sp|Q13573|SNW1_HUMAN SNW domain-containing protein 1 OS=Homo sapiens GN=SNW1 PE=1 SV=1	3.30276	5.6109	sp|Q13573|SNW1_HUMAN	2.30813	1.22917	3.3871	4.45683	4.73327	0.000691736	0.00320726	-0.2105	0	17897000	70899000	31915000	336180000	270920000	796810000	860520000	546760000	2.78395	3.61742	2.84409	3.96561	4.74773	5.69937	5.99102	6.00548	3.30276	5.6109	2.30813	0.000691736	0.00320726
2514	sp|Q9Y2S7|PDIP2_HUMAN	sp|Q9Y2S7|PDIP2_HUMAN	2	sp|Q9Y2S7|PDIP2_HUMAN Polymerase delta-interacting protein 2 OS=Homo sapiens GN=POLDIP2 PE=1 SV=1	-4.89483	-2.58771	sp|Q9Y2S7|PDIP2_HUMAN	2.30712	-0.0558714	4.67011	-3.16449	2.34166	0.0542075	0.101422	-3.93566	4	NA	212060	NA	NA	1329100	1080400	NA	1912400	NA	-4.89483	NA	NA	-2.41676	-3.61581	NA	-1.73056	-4.89483	-2.58771	2.30712	0.0542075	0.101422
2153	sp|Q9H4I2|ZHX3_HUMAN	sp|Q9H4I2|ZHX3_HUMAN	14	sp|Q9H4I2|ZHX3_HUMAN Zinc fingers and homeoboxes protein 3 OS=Homo sapiens GN=ZHX3 PE=1 SV=3	-1.08955	1.21552	sp|Q9H4I2|ZHX3_HUMAN	2.30508	1.18011	3.43004	0.227632	4.59519	0.00111472	0.00458256	-0.58357	1	NA	1718800	2833300	18903000	15317000	41656000	23782000	19457000	NA	-1.83021	-0.85644	-0.582009	0.876878	1.53618	1.0064	1.44263	-1.08955	1.21552	2.30508	0.00111472	0.00458256
1740	sp|Q8TEP8|CE192_HUMAN	sp|Q8TEP8|CE192_HUMAN	7	sp|Q8TEP8|CE192_HUMAN Centrosomal protein of 192 kDa OS=Homo sapiens GN=CEP192 PE=1 SV=2	-5.45205	-3.14761	sp|Q8TEP8|CE192_HUMAN	2.30444	0.772807	3.83608	-4.13522	3.37417	0.0075472	0.0206629	-2.47448	1	101430	83780	NA	1017600	404580	4569200	731490	672600	-4.90279	-6.25493	NA	-5.19843	-4.01935	-1.58159	-3.82958	-3.15991	-5.45205	-3.14761	2.30444	0.0075472	0.0206629
1640	sp|Q8IZH2|XRN1_HUMAN	sp|Q8IZH2|XRN1_HUMAN	46	sp|Q8IZH2|XRN1_HUMAN 5-3 exoribonuclease 1 OS=Homo sapiens GN=XRN1 PE=1 SV=1	1.95634	4.2518	sp|Q8IZH2|XRN1_HUMAN	2.29546	1.22141	3.36951	3.10407	4.72882	0.000696583	0.0032234	-0.217432	0	5711300	27626000	15448000	157360000	176970000	421010000	237540000	111510000	1.08674	2.23707	1.73529	2.76625	4.17396	4.7994	4.20308	3.83075	1.95634	4.2518	2.29546	0.000696583	0.0032234
12	CON__Q3ZBS7	CON__Q3ZBS7	4		-5.56466	-3.27677	CON__Q3ZBS7	2.2879	-0.350354	4.92615	-4.42072	1.97779	0.0810416	0.139097	-4.66227	2	NA	212970	293750	239270	1824900	2980000	NA	108440	NA	-4.88856	-4.31986	-7.48558	-1.9896	-2.18454	NA	-5.65616	-5.56466	-3.27677	2.2879	0.0810416	0.139097
2033	sp|Q9BSC4|NOL10_HUMAN	sp|Q9BSC4|NOL10_HUMAN	14	sp|Q9BSC4|NOL10_HUMAN Nucleolar protein 10 OS=Homo sapiens GN=NOL10 PE=1 SV=1	-1.11344	1.1689	sp|Q9BSC4|NOL10_HUMAN	2.28234	0.406835	4.15785	0.0277304	2.69259	0.0216462	0.0488384	-3.60262	0	340620	1241700	9894200	25661000	20792000	56837000	18306000	11895000	-3.10274	-2.30641	1.05447	-0.0990944	1.28865	1.97454	0.642894	0.769526	-1.11344	1.1689	2.28234	0.0216462	0.0488384
2294	sp|Q9NVM9|ASUN_HUMAN	sp|Q9NVM9|ASUN_HUMAN	4	sp|Q9NVM9|ASUN_HUMAN Protein asunder homolog OS=Homo sapiens GN=ASUN PE=1 SV=2	-4.39146	-2.11357	sp|Q9NVM9|ASUN_HUMAN	2.27788	-1.17909	5.73485	-3.02473	1.53558	0.165445	0.249489	-5.17687	3	NA	422760	NA	1230300	17772000	584960	1391300	NA	NA	-3.88438	NA	-4.89853	1.07718	-4.48133	-2.93657	NA	-4.39146	-2.11357	2.27788	0.165445	0.249489
408	sp|P08651|NFIC_HUMAN	sp|P08651|NFIC_HUMAN	7	sp|P08651|NFIC_HUMAN Nuclear factor 1 C-type OS=Homo sapiens GN=NFIC PE=1 SV=2	-2.33818	-0.0690254	sp|P08651|NFIC_HUMAN	2.26915	-0.677958	5.21627	-0.522856	1.79434	0.11276	0.182145	-4.67054	3	NA	NA	NA	6220100	1524800	16071000	26586000	10522000	NA	NA	NA	-2.33818	-2.23168	0.192603	1.16121	0.601761	-2.33818	-0.0690254	2.26915	0.11276	0.182145
2185	sp|Q9H981|ARP8_HUMAN	sp|Q9H981|ARP8_HUMAN	3	sp|Q9H981|ARP8_HUMAN Actin-related protein 8 OS=Homo sapiens GN=ACTR8 PE=1 SV=2	-6.85905	-4.59343	sp|Q9H981|ARP8_HUMAN	2.26562	-0.919805	5.45105	-5.04655	1.65752	0.138279	0.216692	-4.8493	3	NA	NA	NA	355720	297940	2573100	273070	65191	NA	NA	NA	-6.85905	-4.43159	-2.39164	-5.19825	-6.35222	-6.85905	-4.59343	2.26562	0.138279	0.216692
2535	sp|Q9Y3C6|PPIL1_HUMAN	sp|Q9Y3C6|PPIL1_HUMAN	7	sp|Q9Y3C6|PPIL1_HUMAN Peptidyl-prolyl cis-trans isomerase-like 1 OS=Homo sapiens GN=PPIL1 PE=1 SV=1	1.15812	3.42033	sp|Q9Y3C6|PPIL1_HUMAN	2.26221	0.761819	3.76261	2.28923	3.33608	0.00702134	0.0194945	-2.50662	0	2912800	17255000	5493100	165220000	51353000	130880000	203190000	129670000	0.0862182	1.54776	0.155247	2.84326	2.50689	3.15119	3.98612	4.03713	1.15812	3.42033	2.26221	0.00702134	0.0194945
1879	sp|Q96EV2|RBM33_HUMAN	sp|Q96EV2|RBM33_HUMAN	28	sp|Q96EV2|RBM33_HUMAN RNA-binding protein 33 OS=Homo sapiens GN=RBM33 PE=1 SV=3	3.48551	5.7449	sp|Q96EV2|RBM33_HUMAN	2.25939	1.18078	3.338	4.61521	4.63484	0.000807773	0.00361735	-0.364501	0	28313000	65841000	31018000	381880000	289300000	968900000	850190000	627540000	3.46552	3.50902	2.80052	4.16699	4.83617	5.97522	5.97424	6.19397	3.48551	5.7449	2.25939	0.000807773	0.00361735
1767	sp|Q8WXI9|P66B_HUMAN	sp|Q8WXI9|P66B_HUMAN	21	sp|Q8WXI9|P66B_HUMAN Transcriptional repressor p66-beta OS=Homo sapiens GN=GATAD2B PE=1 SV=1	0.949586	3.20813	sp|Q8WXI9|P66B_HUMAN	2.25854	1.26285	3.25424	2.07886	5.01893	0.00044447	0.00237857	0.228382	0	3995800	15136000	7633400	59455000	152590000	112890000	85441000	66948000	0.555963	1.35587	0.658057	1.22846	3.97424	2.9426	2.7828	3.13288	0.949586	3.20813	2.25854	0.00044447	0.00237857
1612	sp|Q8IWA0|WDR75_HUMAN	sp|Q8IWA0|WDR75_HUMAN	24	sp|Q8IWA0|WDR75_HUMAN WD repeat-containing protein 75 OS=Homo sapiens GN=WDR75 PE=1 SV=1	-0.536451	1.72194	sp|Q8IWA0|WDR75_HUMAN	2.2584	0.336104	4.18069	0.592747	2.5995	0.0254875	0.0554383	-3.75928	0	954070	1594300	10030000	32858000	68907000	112810000	10398000	16127000	-1.57227	-1.94034	1.0753	0.291506	2.90307	2.9416	-0.142752	1.18587	-0.536451	1.72194	2.2584	0.0254875	0.0554383
1738	sp|Q8TED0|UTP15_HUMAN	sp|Q8TED0|UTP15_HUMAN	14	sp|Q8TED0|UTP15_HUMAN U3 small nucleolar RNA-associated protein 15 homolog OS=Homo sapiens GN=UTP15 PE=1 SV=3	-1.20138	1.05607	sp|Q8TED0|UTP15_HUMAN	2.25744	0.448482	4.06641	-0.0726543	2.76119	0.0191895	0.0445302	-3.48662	0	1064500	633150	11401000	11449000	26485000	33111000	18999000	11328000	-1.40953	-3.29284	1.27109	-1.37423	1.61473	1.21232	0.694506	0.70272	-1.20138	1.05607	2.25744	0.0191895	0.0445302
2239	sp|Q9NQ50|RM40_HUMAN	sp|Q9NQ50|RM40_HUMAN	2	sp|Q9NQ50|RM40_HUMAN 39S ribosomal protein L40, mitochondrial OS=Homo sapiens GN=MRPL40 PE=1 SV=1	-6.5716	-4.32257	sp|Q9NQ50|RM40_HUMAN	2.24903	0.224516	4.27355	-5.22218	2.58888	0.0337744	0.0700418	-3.70344	3	NA	NA	102490	284090	253860	1725800	242130	NA	NA	NA	-5.9289	-7.2143	-4.64732	-2.9551	-5.36529	NA	-6.5716	-4.32257	2.24903	0.0337744	0.0700418
1730	sp|Q8TD26|CHD6_HUMAN	sp|Q8TD26|CHD6_HUMAN	23	sp|Q8TD26|CHD6_HUMAN Chromodomain-helicase-DNA-binding protein 6 OS=Homo sapiens GN=CHD6 PE=1 SV=4	-5.28676	-3.03967	sp|Q8TD26|CHD6_HUMAN	2.24709	0.578948	3.91523	-3.7887	3.07219	0.0141413	0.0346411	-2.9507	2	NA	NA	90924	1622200	1497500	2128700	627820	652370	NA	NA	-6.11188	-4.46164	-2.25602	-2.65911	-4.04187	-3.20168	-5.28676	-3.03967	2.24709	0.0141413	0.0346411
425	sp|P10515|ODP2_HUMAN	sp|P10515|ODP2_HUMAN	4	sp|P10515|ODP2_HUMAN Dihydrolipoyllysine-residue acetyltransferase component of pyruvate dehydrogenase complex, mitochondrial OS=Homo sapiens GN=DLAT PE=1 SV=3	-5.29026	-3.05205	sp|P10515|ODP2_HUMAN	2.23822	0.812831	3.66361	-4.17115	3.58121	0.00644019	0.0182286	-2.21696	2	NA	151170	276290	587340	1305400	1090000	1226400	NA	NA	-5.39053	-4.4135	-6.06677	-2.441	-3.60333	-3.11181	NA	-5.29026	-3.05205	2.23822	0.00644019	0.0182286
120	sp|O14965|AURKA_HUMAN	sp|O14965|AURKA_HUMAN	8	sp|O14965|AURKA_HUMAN Aurora kinase A OS=Homo sapiens GN=AURKA PE=1 SV=2	-3.68101	-1.44337	sp|O14965|AURKA_HUMAN	2.23764	0.329307	4.14598	-2.56219	2.59445	0.0257142	0.0558285	-3.76775	0	121720	1544300	149290	4789600	686810	5269900	9849600	3590700	-4.63182	-1.987	-5.35414	-2.75108	-3.3063	-1.38032	-0.218012	-0.868837	-3.68101	-1.44337	2.23764	0.0257142	0.0558285
1300	sp|Q15723|ELF2_HUMAN	sp|Q15723|ELF2_HUMAN	18	sp|Q15723|ELF2_HUMAN ETS-related transcription factor Elf-2 OS=Homo sapiens GN=ELF2 PE=1 SV=2	0.102152	2.33446	sp|Q15723|ELF2_HUMAN	2.23231	1.16613	3.29848	1.2183	4.6327	0.000810519	0.00362277	-0.367871	0	1585400	8315200	5547200	39376000	40942000	55874000	104290000	32068000	-0.817639	0.478608	0.170223	0.577416	2.20162	1.95044	3.0597	2.12607	0.102152	2.33446	2.23231	0.000810519	0.00362277
264	sp|O75665|OFD1_HUMAN	sp|O75665|OFD1_HUMAN	7	sp|O75665|OFD1_HUMAN Oral-facial-digital syndrome 1 protein OS=Homo sapiens GN=OFD1 PE=1 SV=1	-4.95581	-2.72418	sp|O75665|OFD1_HUMAN	2.23163	-0.558628	5.02189	-3.28209	1.9182	0.0994833	0.163838	-4.49605	4	NA	NA	NA	1186500	NA	3087500	3249400	296650	NA	NA	NA	-4.95581	NA	-2.13454	-1.75837	-4.27962	-4.95581	-2.72418	2.23163	0.0994833	0.163838
1189	sp|Q14151|SAFB2_HUMAN	sp|Q14151|SAFB2_HUMAN	24	sp|Q14151|SAFB2_HUMAN Scaffold attachment factor B2 OS=Homo sapiens GN=SAFB2 PE=1 SV=1	-0.335044	1.89299	sp|Q14151|SAFB2_HUMAN	2.22804	1.12557	3.3305	0.778974	4.47164	0.00104774	0.00440763	-0.622886	0	2353200	3693400	5306600	19886000	27200000	75476000	21689000	47667000	-0.230788	-0.70994	0.102464	-0.501913	1.65062	2.37465	0.878437	2.66826	-0.335044	1.89299	2.22804	0.00104774	0.00440763
1993	sp|Q99661|KIF2C_HUMAN	sp|Q99661|KIF2C_HUMAN	20	sp|Q99661|KIF2C_HUMAN Kinesin-like protein KIF2C OS=Homo sapiens GN=KIF2C PE=1 SV=2	-2.46159	-0.235867	sp|Q99661|KIF2C_HUMAN	2.22573	0.288973	4.16248	-1.34873	2.54277	0.0281517	0.0602138	-3.85423	0	689540	177720	1788900	13802000	2396000	11036000	15120000	10817000	-2.05477	-5.15356	-1.55913	-1.07892	-1.62274	-0.337609	0.3773	0.639582	-2.46159	-0.235867	2.22573	0.0281517	0.0602138
1164	sp|Q13595|TRA2A_HUMAN	sp|Q13595|TRA2A_HUMAN	16	sp|Q13595|TRA2A_HUMAN Transformer-2 protein homolog alpha OS=Homo sapiens GN=TRA2A PE=1 SV=1	0.934695	3.15435	sp|Q13595|TRA2A_HUMAN	2.21965	0.981306	3.458	2.04452	3.96599	0.00239931	0.00832703	-1.4456	0	4787600	32319000	4762800	37733000	86568000	125210000	93938000	81605000	0.824597	2.46685	-0.0627491	0.510076	3.21051	3.08871	2.91449	3.40368	0.934695	3.15435	2.21965	0.00239931	0.00832703
1862	sp|Q96CX2|KCD12_HUMAN	sp|Q96CX2|KCD12_HUMAN	5	sp|Q96CX2|KCD12_HUMAN BTB/POZ domain-containing protein KCTD12 OS=Homo sapiens GN=KCTD12 PE=1 SV=1	-4.56175	-2.35011	sp|Q96CX2|KCD12_HUMAN	2.21164	-0.629474	5.05276	-3.08733	1.77536	0.111358	0.180126	-4.89978	2	NA	66688	944950	NA	1805300	4953500	4191100	248160	NA	-6.5891	-2.53441	NA	-2.00415	-1.46767	-1.40488	-4.52375	-4.56175	-2.35011	2.21164	0.111358	0.180126
573	sp|P28331|NDUS1_HUMAN	sp|P28331|NDUS1_HUMAN	3	sp|P28331|NDUS1_HUMAN NADH-ubiquinone oxidoreductase 75 kDa subunit, mitochondrial OS=Homo sapiens GN=NDUFS1 PE=1 SV=3	-5.37164	-3.16446	sp|P28331|NDUS1_HUMAN	2.20718	-1.66534	6.07969	-3.6059	1.32826	0.222863	0.318183	-5.25117	3	NA	NA	147590	NA	1535200	5539700	1421700	71865	NA	NA	-5.37164	NA	-2.22252	-1.30989	-2.90655	-6.2189	-5.37164	-3.16446	2.20718	0.222863	0.318183
192	sp|O60264|SMCA5_HUMAN	sp|O60264|SMCA5_HUMAN	50	sp|O60264|SMCA5_HUMAN SWI/SNF-related matrix-associated actin-dependent regulator of chromatin subfamily A member 5 OS=Homo sapiens GN=SMARCA5 PE=1 SV=1	2.77437	4.97886	sp|O60264|SMCA5_HUMAN	2.2045	1.2386	3.1704	3.87662	5.04995	0.000423919	0.00229461	0.275312	0	12835000	58165000	38570000	120650000	302630000	551840000	322860000	305230000	2.28994	3.32747	3.13351	2.34655	4.89687	5.18114	4.62934	5.20811	2.77437	4.97886	2.2045	0.000423919	0.00229461
1327	sp|Q16649|NFIL3_HUMAN	sp|Q16649|NFIL3_HUMAN	2	sp|Q16649|NFIL3_HUMAN Nuclear factor interleukin-3-regulated protein OS=Homo sapiens GN=NFIL3 PE=1 SV=2	NA	-3.09348	sp|Q16649|NFIL3_HUMAN	NA	NA	NA	-3.09348	NA	NA	NA	NA	4	NA	NA	NA	NA	401320	3218000	1127400	734860	NA	NA	NA	NA	-4.03025	-2.07614	-3.22872	-3.03881	-5.2973	-3.09348	2.20382	0	0
1818	sp|Q92979|NEP1_HUMAN	sp|Q92979|NEP1_HUMAN	12	sp|Q92979|NEP1_HUMAN Ribosomal RNA small subunit methyltransferase NEP1 OS=Homo sapiens GN=EMG1 PE=1 SV=4	-0.290894	1.91205	sp|Q92979|NEP1_HUMAN	2.20294	0.588995	3.81689	0.810578	3.02011	0.0121821	0.0305524	-3.04602	0	911710	2627100	17232000	23812000	46295000	73471000	30685000	21575000	-1.63976	-1.20887	1.9023	-0.217247	2.36718	2.33667	1.36038	1.58396	-0.290894	1.91205	2.20294	0.0121821	0.0305524
87	sp|O00566|MPP10_HUMAN	sp|O00566|MPP10_HUMAN	11	sp|O00566|MPP10_HUMAN U3 small nucleolar ribonucleoprotein protein MPP10 OS=Homo sapiens GN=MPHOSPH10 PE=1 SV=2	-1.85575	0.343825	sp|O00566|MPP10_HUMAN	2.19957	0.0411846	4.35796	-0.755962	2.25485	0.0464843	0.0898468	-4.3279	0	1004300	271820	5787000	9733900	17695000	27508000	3462500	14320000	-1.49603	-4.53122	0.234894	-1.63063	1.07133	0.950793	-1.67014	1.02331	-1.85575	0.343825	2.19957	0.0464843	0.0898468
1801	sp|Q92769|HDAC2_HUMAN	sp|Q92769|HDAC2_HUMAN	16	sp|Q92769|HDAC2_HUMAN Histone deacetylase 2 OS=Homo sapiens GN=HDAC2 PE=1 SV=2	1.07908	3.27552	sp|Q92769|HDAC2_HUMAN	2.19643	1.22552	3.16734	2.1773	5.00549	0.000453695	0.00240329	0.208017	0	4138500	15989000	8840500	65842000	129180000	178320000	90433000	56593000	0.608104	1.43616	0.882399	1.38967	3.74983	3.58751	2.86167	2.90304	1.07908	3.27552	2.19643	0.000453695	0.00240329
1489	sp|Q6RFH5|WDR74_HUMAN	sp|Q6RFH5|WDR74_HUMAN	8	sp|Q6RFH5|WDR74_HUMAN WD repeat-containing protein 74 OS=Homo sapiens GN=WDR74 PE=1 SV=1	-3.34353	-1.14781	sp|Q6RFH5|WDR74_HUMAN	2.19572	-0.816992	5.20843	-1.87972	1.66218	0.132637	0.208877	-5.05473	2	NA	153110	2098500	NA	5568200	19035000	896970	3286800	NA	-5.37186	-1.31521	NA	-0.486531	0.431381	-3.54631	-0.989799	-3.34353	-1.14781	2.19572	0.132637	0.208877
1739	sp|Q8TEK3|DOT1L_HUMAN	sp|Q8TEK3|DOT1L_HUMAN	10	sp|Q8TEK3|DOT1L_HUMAN Histone-lysine N-methyltransferase, H3 lysine-79 specific OS=Homo sapiens GN=DOT1L PE=1 SV=2	-2.71337	-0.521044	sp|Q8TEK3|DOT1L_HUMAN	2.19233	-0.557528	4.94218	-0.959509	1.85795	0.102479	0.167853	-4.58567	3	NA	NA	NA	4905300	10345000	26365000	2944300	2386100	NA	NA	NA	-2.71337	0.348083	0.890924	-1.89533	-1.42786	-2.71337	-0.521044	2.19233	0.102479	0.167853
414	sp|P09234|RU1C_HUMAN	sp|P09234|RU1C_HUMAN	2	sp|P09234|RU1C_HUMAN U1 small nuclear ribonucleoprotein C OS=Homo sapiens GN=SNRPC PE=1 SV=1	-3.43592	-1.24446	sp|P09234|RU1C_HUMAN	2.19145	-0.213188	4.59609	-1.68275	2.12383	0.0684888	0.121896	-4.22177	3	NA	574220	NA	NA	1471500	16955000	3775800	2405900	NA	-3.43592	NA	NA	-2.27962	0.268141	-1.54982	-1.41655	-3.43592	-1.24446	2.19145	0.0684888	0.121896
1830	sp|Q969X6|UTP4_HUMAN	sp|Q969X6|UTP4_HUMAN	15	sp|Q969X6|UTP4_HUMAN U3 small nucleolar RNA-associated protein 4 homolog OS=Homo sapiens GN=UTP4 PE=1 SV=1	-0.720546	1.46929	sp|Q969X6|UTP4_HUMAN	2.18983	0.383122	3.99654	0.37437	2.68183	0.0220591	0.0495805	-3.62078	0	393280	2938000	8992100	29922000	46178000	63743000	13470000	15828000	-2.88913	-1.04506	0.908382	0.14362	2.36377	2.13631	0.216796	1.16027	-0.720546	1.46929	2.18983	0.0220591	0.0495805
1313	sp|Q16254|E2F4_HUMAN	sp|Q16254|E2F4_HUMAN	3	sp|Q16254|E2F4_HUMAN Transcription factor E2F4 OS=Homo sapiens GN=E2F4 PE=1 SV=2	-4.98344	-2.79469	sp|Q16254|E2F4_HUMAN	2.18875	0.617511	3.75999	-3.52427	3.17697	0.0119996	0.0301588	-2.79067	2	NA	107650	NA	2066600	834630	1246000	2038700	1247800	NA	-5.88778	NA	-4.0791	-3.04365	-3.41464	-2.40587	-2.3146	-4.98344	-2.79469	2.18875	0.0119996	0.0301588
1030	sp|Q02241|KIF23_HUMAN	sp|Q02241|KIF23_HUMAN	21	sp|Q02241|KIF23_HUMAN Kinesin-like protein KIF23 OS=Homo sapiens GN=KIF23 PE=1 SV=3	-0.333694	1.85417	sp|Q02241|KIF23_HUMAN	2.18786	1.09781	3.27792	0.760236	4.441	0.00110064	0.00456187	-0.671812	0	1519000	3934200	3217800	46081000	34689000	40893000	58956000	22822000	-0.881214	-0.617438	-0.661979	0.825854	1.97831	1.51011	2.26743	1.66082	-0.333694	1.85417	2.18786	0.00110064	0.00456187
2302	sp|Q9NW64|RBM22_HUMAN	sp|Q9NW64|RBM22_HUMAN	17	sp|Q9NW64|RBM22_HUMAN Pre-mRNA-splicing factor RBM22 OS=Homo sapiens GN=RBM22 PE=1 SV=1	1.53512	3.71976	sp|Q9NW64|RBM22_HUMAN	2.18463	1.1677	3.20157	2.62744	4.75329	0.000670366	0.00314526	-0.179344	0	6057900	26968000	16878000	48108000	94295000	170590000	185890000	142460000	1.17429	2.20176	1.87058	0.893867	3.32571	3.525	3.86252	4.1658	1.53512	3.71976	2.18463	0.000670366	0.00314526
1019	sp|Q01085|TIAR_HUMAN;sp|P31483|TIA1_HUMAN	sp|Q01085|TIAR_HUMAN	4	sp|Q01085|TIAR_HUMAN Nucleolysin TIAR OS=Homo sapiens GN=TIAL1 PE=1 SV=1;sp|P31483|TIA1_HUMAN Nucleolysin TIA-1 isoform p40 OS=Homo sapiens GN=TIA1 PE=1 SV=3	-3.78099	-1.59713	sp|Q01085|TIAR_HUMAN	2.18386	-0.176799	4.54452	-2.53307	2.07466	0.0660928	0.118615	-4.5611	1	74778	NA	1255800	2333200	331460	6599000	8483800	4331800	-5.35576	NA	-2.09982	-3.88739	-4.28794	-1.06305	-0.425353	-0.61218	-3.78099	-1.59713	2.18386	0.0660928	0.118615
1158	sp|Q13547|HDAC1_HUMAN	sp|Q13547|HDAC1_HUMAN	17	sp|Q13547|HDAC1_HUMAN Histone deacetylase 1 OS=Homo sapiens GN=HDAC1 PE=1 SV=1	2.1646	4.34676	sp|Q13547|HDAC1_HUMAN	2.18216	1.27932	3.085	3.25568	5.3479	0.000270941	0.00163684	0.718488	0	11986000	26025000	19428000	112420000	254710000	391310000	245210000	107370000	2.18825	2.14963	2.08559	2.23492	4.6646	4.6962	4.24722	3.779	2.1646	4.34676	2.18216	0.000270941	0.00163684
739	sp|P49116|NR2C2_HUMAN	sp|P49116|NR2C2_HUMAN	17	sp|P49116|NR2C2_HUMAN Nuclear receptor subfamily 2 group C member 2 OS=Homo sapiens GN=NR2C2 PE=1 SV=1	-0.272996	1.90734	sp|P49116|NR2C2_HUMAN	2.18034	1.05705	3.30362	0.817172	4.2948	0.00139459	0.00539548	-0.906969	0	3407100	6608700	2245300	22012000	18127000	51255000	56352000	41908000	0.319132	0.142201	-1.21188	-0.341435	1.10383	1.82871	2.20468	2.49213	-0.272996	1.90734	2.18034	0.00139459	0.00539548
2576	sp|Q9Y5Z7|HCFC2_HUMAN	sp|Q9Y5Z7|HCFC2_HUMAN	5	sp|Q9Y5Z7|HCFC2_HUMAN Host cell factor 2 OS=Homo sapiens GN=HCFC2 PE=1 SV=1	-5.29504	-3.12105	sp|Q9Y5Z7|HCFC2_HUMAN	2.17398	1.18901	3.15895	-4.20805	4.88362	0.000547271	0.002748	0.0220208	0	76840	216890	122340	927680	635150	2529300	1350100	460410	-5.31534	-4.86185	-5.65837	-5.3446	-3.41166	-2.41586	-2.97833	-3.67837	-5.29504	-3.12105	2.17398	0.000547271	0.002748
2286	sp|Q9NV06|DCA13_HUMAN	sp|Q9NV06|DCA13_HUMAN	15	sp|Q9NV06|DCA13_HUMAN DDB1- and CUL4-associated factor 13 OS=Homo sapiens GN=DCAF13 PE=1 SV=2	-0.694137	1.47574	sp|Q9NV06|DCA13_HUMAN	2.16988	1.06792	3.27183	0.390801	4.35693	0.00126068	0.00501722	-0.806688	0	1025100	2774400	6256600	19460000	26467000	51846000	23745000	19420000	-1.46557	-1.12897	0.354121	-0.536127	1.61381	1.84489	1.00424	1.44002	-0.694137	1.47574	2.16988	0.00126068	0.00501722
2084	sp|Q9BZ95|NSD3_HUMAN	sp|Q9BZ95|NSD3_HUMAN	12	sp|Q9BZ95|NSD3_HUMAN Histone-lysine N-methyltransferase NSD3 OS=Homo sapiens GN=WHSC1L1 PE=1 SV=1	-1.67323	0.488157	sp|Q9BZ95|NSD3_HUMAN	2.16139	0.561096	3.76168	-0.438153	3.02893	0.0133653	0.0330978	-3.03486	1	514660	NA	1267400	20622000	9546000	15652000	8745200	28004000	-2.48943	NA	-2.08577	-0.444494	0.239778	0.155336	-0.383202	1.94071	-1.67323	0.488157	2.16139	0.0133653	0.0330978
824	sp|P53618|COPB_HUMAN	sp|P53618|COPB_HUMAN	7	sp|P53618|COPB_HUMAN Coatomer subunit beta OS=Homo sapiens GN=COPB1 PE=1 SV=3	-2.46919	-0.3101	sp|P53618|COPB_HUMAN	2.15909	0.774391	3.54379	-1.38964	3.55611	0.00669005	0.0187958	-2.25454	2	NA	843700	1156000	6336700	11583000	12238000	4723000	NA	NA	-2.87238	-2.22636	-2.30884	0.500385	-0.191768	-1.23892	NA	-2.46919	-0.3101	2.15909	0.00669005	0.0187958
322	sp|O95619|YETS4_HUMAN	sp|O95619|YETS4_HUMAN	9	sp|O95619|YETS4_HUMAN YEATS domain-containing protein 4 OS=Homo sapiens GN=YEATS4 PE=1 SV=1	-1.37747	0.775575	sp|O95619|YETS4_HUMAN	2.15304	0.68115	3.62493	-0.147157	3.28045	0.00880504	0.0234801	-2.62605	1	NA	5472200	1178300	8738500	25287000	15958000	29170000	7170700	NA	-0.134171	-2.19716	-1.80107	1.55236	0.182649	1.29005	0.0772404	-1.37747	0.775575	2.15304	0.00880504	0.0234801
247	sp|O75475|PSIP1_HUMAN	sp|O75475|PSIP1_HUMAN	28	sp|O75475|PSIP1_HUMAN PC4 and SFRS1-interacting protein OS=Homo sapiens GN=PSIP1 PE=1 SV=1	1.9785	4.12308	sp|O75475|PSIP1_HUMAN	2.14458	1.02925	3.25991	3.05079	4.2545	0.00148938	0.00566924	-0.972282	0	7002800	13876000	32834000	125460000	173840000	388260000	187750000	107520000	1.38967	1.22857	2.88747	2.40831	4.14991	4.68516	3.87635	3.78091	1.9785	4.12308	2.14458	0.00148938	0.00566924
1550	sp|Q7Z5L9|I2BP2_HUMAN	sp|Q7Z5L9|I2BP2_HUMAN	21	sp|Q7Z5L9|I2BP2_HUMAN Interferon regulatory factor 2-binding protein 2 OS=Homo sapiens GN=IRF2BP2 PE=1 SV=2	1.54	3.678	sp|Q7Z5L9|I2BP2_HUMAN	2.138	0.936483	3.33952	2.609	3.93719	0.00251769	0.00863627	-1.49336	0	4479700	16008000	12937000	135680000	54558000	225510000	212100000	141760000	0.725823	1.4379	1.46422	2.53204	2.58846	3.91872	4.04573	4.15907	1.54	3.678	2.138	0.00251769	0.00863627
1188	sp|Q14145|KEAP1_HUMAN	sp|Q14145|KEAP1_HUMAN	3	sp|Q14145|KEAP1_HUMAN Kelch-like ECH-associated protein 1 OS=Homo sapiens GN=KEAP1 PE=1 SV=2	-4.902	-2.77295	sp|Q14145|KEAP1_HUMAN	2.12905	-0.481585	4.73968	-3.62457	1.90054	0.096102	0.159719	-4.69087	3	NA	313270	137430	NA	3179200	406990	2570100	NA	NA	-4.32336	-5.48063	NA	-1.24166	-4.99306	-2.08413	NA	-4.902	-2.77295	2.12905	0.096102	0.159719
2589	sp|Q9Y6J9|TAF6L_HUMAN	sp|Q9Y6J9|TAF6L_HUMAN	9	sp|Q9Y6J9|TAF6L_HUMAN TAF6-like RNA polymerase II p300/CBP-associated factor-associated factor 65 kDa subunit 6L OS=Homo sapiens GN=TAF6L PE=1 SV=1	-1.51056	0.614875	sp|Q9Y6J9|TAF6L_HUMAN	2.12544	0.877667	3.37321	-0.296028	3.82005	0.00367149	0.0117091	-1.76321	1	502250	2626900	NA	16498000	17151000	14788000	17465000	11964000	-2.5257	-1.20898	NA	-0.797011	1.02926	0.0752336	0.577569	0.777438	-1.51056	0.614875	2.12544	0.00367149	0.0117091
1827	sp|Q93077|H2A1C_HUMAN;sp|Q7L7L0|H2A3_HUMAN;sp|P04908|H2A1B_HUMAN	sp|Q93077|H2A1C_HUMAN	8	sp|Q93077|H2A1C_HUMAN Histone H2A type 1-C OS=Homo sapiens GN=HIST1H2AC PE=1 SV=3;sp|Q7L7L0|H2A3_HUMAN Histone H2A type 3 OS=Homo sapiens GN=HIST3H2A PE=1 SV=3;sp|P04908|H2A1B_HUMAN Histone H2A type 1-B/E OS=Homo sapiens GN=HIST1H2AB PE=1 SV=2	2.3619	4.48457	sp|Q93077|H2A1C_HUMAN	2.12267	1.23884	3.00651	3.42324	5.314	0.000284915	0.00170228	0.668758	0	14086000	25747000	25679000	122740000	246370000	451320000	232150000	151490000	2.42814	2.13391	2.51187	2.37368	4.61974	4.89747	4.1712	4.24987	2.3619	4.48457	2.12267	0.000284915	0.00170228
2590	sp|Q9Y6K0|CEPT1_HUMAN	sp|Q9Y6K0|CEPT1_HUMAN	3	sp|Q9Y6K0|CEPT1_HUMAN Choline/ethanolaminephosphotransferase 1 OS=Homo sapiens GN=CEPT1 PE=1 SV=1	-3.53168	-1.4094	sp|Q9Y6K0|CEPT1_HUMAN	2.12228	0.997362	3.2472	-2.31895	4.23095	0.00193172	0.00694947	-1.12755	1	NA	736760	508170	2115900	2064300	3948700	4857100	3703400	NA	-3.07087	-3.48232	-4.04185	-1.82352	-1.78748	-1.20003	-0.826565	-3.53168	-1.4094	2.12228	0.00193172	0.00694947
1465	sp|Q6NTE8|CE045_HUMAN	sp|Q6NTE8|CE045_HUMAN	10	sp|Q6NTE8|CE045_HUMAN UPF0544 protein C5orf45 OS=Homo sapiens GN=C5orf45 PE=2 SV=2	-2.45194	-0.331918	sp|Q6NTE8|CE045_HUMAN	2.12002	0.703025	3.53702	-1.39193	3.3104	0.00734128	0.0201928	-2.55041	0	357070	788490	1001500	11567000	1898600	13054000	11096000	11828000	-3.03265	-2.97149	-2.44559	-1.35802	-1.93626	-0.100709	-0.0525064	0.7618	-2.45194	-0.331918	2.12002	0.00734128	0.0201928
1614	sp|Q8IWI9|MGAP_HUMAN	sp|Q8IWI9|MGAP_HUMAN	39	sp|Q8IWI9|MGAP_HUMAN MAX gene-associated protein OS=Homo sapiens GN=MGA PE=1 SV=3	0.3183	2.4351	sp|Q8IWI9|MGAP_HUMAN	2.1168	0.631104	3.60249	1.3767	3.15253	0.00966358	0.0252559	-2.81988	0	6048200	2454100	6130100	54364000	128590000	79495000	39053000	26275000	1.17191	-1.30863	0.322908	1.08702	3.74367	2.44784	1.69534	1.85354	0.3183	2.4351	2.1168	0.00966358	0.0252559
2556	sp|Q9Y4P8|WIPI2_HUMAN	sp|Q9Y4P8|WIPI2_HUMAN	6	sp|Q9Y4P8|WIPI2_HUMAN WD repeat domain phosphoinositide-interacting protein 2 OS=Homo sapiens GN=WIPI2 PE=1 SV=1	-1.46972	0.64473	sp|Q9Y4P8|WIPI2_HUMAN	2.11445	0.172655	4.05624	-0.412493	2.40937	0.0355431	0.0730555	-4.07561	0	1634100	375380	1436500	46692000	12805000	33010000	12841000	10394000	-0.772682	-4.05846	-1.89438	0.846665	0.635524	1.20801	0.15037	0.585019	-1.46972	0.64473	2.11445	0.0355431	0.0730555
1517	sp|Q71UI9|H2AV_HUMAN;sp|P0C0S5|H2AZ_HUMAN	sp|Q71UI9|H2AV_HUMAN	6	sp|Q71UI9|H2AV_HUMAN Histone H2A.V OS=Homo sapiens GN=H2AFV PE=1 SV=3;sp|P0C0S5|H2AZ_HUMAN Histone H2A.Z OS=Homo sapiens GN=H2AFZ PE=1 SV=2	3.64356	5.75317	sp|Q71UI9|H2AV_HUMAN	2.10962	1.02585	3.19339	4.69837	4.307	0.00136715	0.00531546	-0.88723	0	54961000	41268000	78207000	192480000	499650000	1015000000	634730000	481340000	4.45114	2.82484	4.21371	3.08454	5.57244	6.04079	5.56829	5.83117	3.64356	5.75317	2.10962	0.00136715	0.00531546
1732	sp|Q8TDD1|DDX54_HUMAN	sp|Q8TDD1|DDX54_HUMAN	6	sp|Q8TDD1|DDX54_HUMAN ATP-dependent RNA helicase DDX54 OS=Homo sapiens GN=DDX54 PE=1 SV=2	-4.63821	-2.53622	sp|Q8TDD1|DDX54_HUMAN	2.102	0.545928	3.65807	-3.58722	2.9889	0.0128668	0.0320312	-3.09927	0	72305	676460	181180	1234700	3126800	4225300	834870	508350	-5.40574	-3.19593	-5.0583	-4.89289	-1.26406	-1.69197	-3.64597	-3.54288	-4.63821	-2.53622	2.102	0.0128668	0.0320312
625	sp|P35232|PHB_HUMAN	sp|P35232|PHB_HUMAN	6	sp|P35232|PHB_HUMAN Prohibitin OS=Homo sapiens GN=PHB PE=1 SV=1	-3.55555	-1.45381	sp|P35232|PHB_HUMAN	2.10174	-1.80157	6.00505	-2.50468	1.22802	0.25219	0.349277	-5.64957	2	NA	44452	6473200	2329900	5756800	1266800	7876600	NA	NA	-7.18315	0.406129	-3.88963	-0.441649	-3.39128	-0.528504	NA	-3.55555	-1.45381	2.10174	0.25219	0.349277
1330	sp|Q16778|H2B2E_HUMAN;sp|P33778|H2B1B_HUMAN;sp|P23527|H2B1O_HUMAN;sp|P06899|H2B1J_HUMAN;sp|Q8N257|H2B3B_HUMAN;sp|Q96A08|H2B1A_HUMAN	sp|Q16778|H2B2E_HUMAN	9	sp|Q16778|H2B2E_HUMAN Histone H2B type 2-E OS=Homo sapiens GN=HIST2H2BE PE=1 SV=3;sp|P33778|H2B1B_HUMAN Histone H2B type 1-B OS=Homo sapiens GN=HIST1H2BB PE=1 SV=2;sp|P23527|H2B1O_HUMAN Histone H2B type 1-O OS=Homo sapiens GN=HIST1H2BO PE=1 SV=3;sp|P06899|	5.09449	7.19282	sp|Q16778|H2B2E_HUMAN	2.09833	1.05578	3.14089	6.14366	4.45334	0.001079	0.00449902	-0.65209	0	75645000	244040000	219170000	398940000	1477400000	3130800000	1544900000	1413300000	4.92579	5.42773	5.78841	4.23604	7.03319	7.62979	6.80383	7.30449	5.09449	7.19282	2.09833	0.001079	0.00449902
582	sp|P29375|KDM5A_HUMAN	sp|P29375|KDM5A_HUMAN	2	sp|P29375|KDM5A_HUMAN Lysine-specific demethylase 5A OS=Homo sapiens GN=KDM5A PE=1 SV=3	-7.13777	-5.04878	sp|P29375|KDM5A_HUMAN	2.08899	-0.117915	4.2959	-5.57103	2.27022	0.0600317	0.110167	-4.03088	4	NA	NA	46464	NA	NA	631150	345470	90692	NA	NA	-7.13777	NA	NA	-4.37412	-4.87159	-5.90063	-7.13777	-5.04878	2.08899	0.0600317	0.110167
2056	sp|Q9BVJ6|UT14A_HUMAN	sp|Q9BVJ6|UT14A_HUMAN	22	sp|Q9BVJ6|UT14A_HUMAN U3 small nucleolar RNA-associated protein 14 homolog A OS=Homo sapiens GN=UTP14A PE=1 SV=1	0.220108	2.30697	sp|Q9BVJ6|UT14A_HUMAN	2.08686	0.482194	3.69153	1.26354	2.87751	0.0156439	0.037673	-3.2891	0	1570900	2361200	15390000	64101000	60196000	60762000	36777000	53503000	-0.831292	-1.36515	1.72955	1.34733	2.72097	2.06875	1.61193	2.82624	0.220108	2.30697	2.08686	0.0156439	0.037673
2141	sp|Q9H2X6|HIPK2_HUMAN	sp|Q9H2X6|HIPK2_HUMAN	3	sp|Q9H2X6|HIPK2_HUMAN Homeodomain-interacting protein kinase 2 OS=Homo sapiens GN=HIPK2 PE=1 SV=2	NA	-3.22247	sp|Q9H2X6|HIPK2_HUMAN	NA	NA	NA	-3.22247	NA	NA	NA	NA	4	NA	NA	NA	NA	488670	577760	1501300	1824000	NA	NA	NA	NA	-3.76491	-4.4988	-2.83088	-1.7953	-5.2973	-3.22247	2.07483	0	0
1272	sp|Q15397|PUM3_HUMAN	sp|Q15397|PUM3_HUMAN	23	sp|Q15397|PUM3_HUMAN Pumilio homolog 3 OS=Homo sapiens GN=PUM3 PE=1 SV=3	-0.460323	1.60848	sp|Q15397|PUM3_HUMAN	2.0688	0.106785	4.03082	0.721849	2.36468	0.0407641	0.0809792	-4.10901	1	NA	1386500	11166000	20223000	45902000	100450000	15782000	12741000	NA	-2.14487	1.23926	-0.475363	2.3557	2.77789	0.436822	0.863507	-0.460323	1.60848	2.0688	0.0407641	0.0809792
2493	sp|Q9Y221|NIP7_HUMAN	sp|Q9Y221|NIP7_HUMAN	7	sp|Q9Y221|NIP7_HUMAN 60S ribosome subunit biogenesis protein NIP7 homolog OS=Homo sapiens GN=NIP7 PE=1 SV=1	-1.87973	0.185538	sp|Q9Y221|NIP7_HUMAN	2.06527	0.0425474	4.08799	-0.847096	2.25917	0.0461381	0.0894411	-4.32092	0	195220	1157100	2555500	24610000	24739000	36428000	6905600	2406100	-3.92986	-2.40976	-1.01413	-0.165167	1.52284	1.347	-0.711248	-1.41644	-1.87973	0.185538	2.06527	0.0461381	0.0894411
1945	sp|Q96QT6|PHF12_HUMAN	sp|Q96QT6|PHF12_HUMAN	6	sp|Q96QT6|PHF12_HUMAN PHD finger protein 12 OS=Homo sapiens GN=PHF12 PE=1 SV=2	-3.08717	-1.02361	sp|Q96QT6|PHF12_HUMAN	2.06356	-0.223601	4.35073	-1.84904	2.10261	0.0707365	0.12508	-4.40686	3	NA	237930	NA	10926000	5393600	5170200	NA	2957700	NA	-4.72625	NA	-1.4481	-0.529457	-1.40727	NA	-1.13411	-3.08717	-1.02361	2.06356	0.0707365	0.12508
1666	sp|Q8N6T7|SIR6_HUMAN	sp|Q8N6T7|SIR6_HUMAN	2	sp|Q8N6T7|SIR6_HUMAN NAD-dependent protein deacetylase sirtuin-6 OS=Homo sapiens GN=SIRT6 PE=1 SV=2	-4.11162	-2.05036	sp|Q8N6T7|SIR6_HUMAN	2.06126	0.0119423	4.11058	-2.56567	2.41234	0.0490158	0.0935901	-3.84143	4	NA	NA	NA	2024500	1664300	4995600	1796400	NA	NA	NA	NA	-4.11162	-2.11373	-1.45573	-2.58162	NA	-4.11162	-2.05036	2.06126	0.0490158	0.0935901
1620	sp|Q8IWZ8|SUGP1_HUMAN	sp|Q8IWZ8|SUGP1_HUMAN	28	sp|Q8IWZ8|SUGP1_HUMAN SURP and G-patch domain-containing protein 1 OS=Homo sapiens GN=SUGP1 PE=1 SV=2	1.89801	3.94376	sp|Q8IWZ8|SUGP1_HUMAN	2.04575	0.901006	3.19049	2.92089	3.95415	0.00244727	0.00843146	-1.46523	0	8246600	32506000	7910200	157900000	139510000	205890000	245520000	115790000	1.6326	2.4753	0.712488	2.77166	3.85349	3.79032	4.24897	3.88227	1.89801	3.94376	2.04575	0.00244727	0.00843146
1639	sp|Q8IZD4|DCP1B_HUMAN	sp|Q8IZD4|DCP1B_HUMAN	7	sp|Q8IZD4|DCP1B_HUMAN mRNA-decapping enzyme 1B OS=Homo sapiens GN=DCP1B PE=1 SV=2	-2.06877	-0.0261413	sp|Q8IZD4|DCP1B_HUMAN	2.04263	0.435042	3.65022	-0.901554	2.84952	0.0180456	0.0422916	-3.32714	1	NA	1107000	679550	17615000	7425400	8071900	28720000	4717600	NA	-2.47458	-3.03823	-0.693506	-0.0987061	-0.778835	1.26846	-0.49548	-2.06877	-0.0261413	2.04263	0.0180456	0.0422916
54	sp|A8CG34|P121C_HUMAN	sp|A8CG34|P121C_HUMAN	16	sp|A8CG34|P121C_HUMAN Nuclear envelope pore membrane protein POM 121C OS=Homo sapiens GN=POM121C PE=1 SV=2	-2.38287	-0.34864	sp|A8CG34|P121C_HUMAN	2.03423	0.436926	3.63153	-1.22045	2.85607	0.0178484	0.0419543	-3.31647	1	NA	687440	543970	18713000	5594200	17063000	6915800	4763600	NA	-3.17235	-3.37829	-0.59797	-0.480254	0.277098	-0.709198	-0.482207	-2.38287	-0.34864	2.03423	0.0178484	0.0419543
1948	sp|Q96RE7|NACC1_HUMAN	sp|Q96RE7|NACC1_HUMAN	10	sp|Q96RE7|NACC1_HUMAN Nucleus accumbens-associated protein 1 OS=Homo sapiens GN=NACC1 PE=1 SV=1	-1.77257	0.25901	sp|Q96RE7|NACC1_HUMAN	2.03158	-0.7112	4.77436	-0.147306	1.72616	0.124866	0.19844	-4.76032	3	NA	1787800	NA	NA	18276000	33456000	15019000	1993500	NA	-1.77257	NA	NA	1.11486	1.22694	0.367991	-1.67375	-1.77257	0.25901	2.03158	0.124866	0.19844
2607	zz|FGCZCont0255_P12763|FETUA_BOVIN;CON__P12763	zz|FGCZCont0255_P12763|FETUA_BOVIN	6	zz|FGCZCont0255_P12763|FETUA_BOVIN blastpHomologue_0.0;	-0.36394	1.66667	zz|FGCZCont0255_P12763|FETUA_BOVIN	2.03061	0.307632	3.75359	0.651366	2.60769	0.0251241	0.0547993	-3.74554	0	1479100	5687100	12161000	8596600	52299000	80369000	11175000	23737000	-0.920767	-0.0777569	1.3697	-1.82694	2.53149	2.46326	-0.0426521	1.71459	-0.36394	1.66667	2.03061	0.0251241	0.0547993
189	sp|O60216|RAD21_HUMAN	sp|O60216|RAD21_HUMAN	10	sp|O60216|RAD21_HUMAN Double-strand-break repair protein rad21 homolog OS=Homo sapiens GN=RAD21 PE=1 SV=2	-2.45866	-0.4283	sp|O60216|RAD21_HUMAN	2.03036	0.379867	3.68085	-1.44348	2.72188	0.0205613	0.0469745	-3.55316	0	421870	1458300	2349100	2410300	14217000	20753000	4528900	1891300	-2.78485	-2.07092	-1.14282	-3.83603	0.776464	0.55328	-1.29721	-1.74574	-2.45866	-0.4283	2.03036	0.0205613	0.0469745
2527	sp|Q9Y399|RT02_HUMAN	sp|Q9Y399|RT02_HUMAN	5	sp|Q9Y399|RT02_HUMAN 28S ribosomal protein S2, mitochondrial OS=Homo sapiens GN=MRPS2 PE=1 SV=1	-2.95657	-0.926724	sp|Q9Y399|RT02_HUMAN	2.02984	0.0632081	3.99648	-1.73866	2.40534	0.0446145	0.0869448	-3.97069	3	NA	NA	1278000	2404100	9338000	4707900	NA	2346300	NA	NA	-2.07304	-3.8401	0.210095	-1.5394	NA	-1.45086	-2.95657	-0.926724	2.02984	0.0446145	0.0869448
2162	sp|Q9H6F5|CCD86_HUMAN	sp|Q9H6F5|CCD86_HUMAN	9	sp|Q9H6F5|CCD86_HUMAN Coiled-coil domain-containing protein 86 OS=Homo sapiens GN=CCDC86 PE=1 SV=1	0.295567	2.32508	sp|Q9H6F5|CCD86_HUMAN	2.02951	0.596785	3.46224	1.45529	3.17676	0.0104518	0.0268302	-2.7943	1	NA	2854900	12179000	39989000	45527000	92509000	39288000	45026000	NA	-1.08708	1.37196	0.601823	2.34464	2.66172	1.70367	2.59029	0.295567	2.32508	2.02951	0.0104518	0.0268302
184	sp|O43809|CPSF5_HUMAN	sp|O43809|CPSF5_HUMAN	21	sp|O43809|CPSF5_HUMAN Cleavage and polyadenylation specificity factor subunit 5 OS=Homo sapiens GN=NUDT21 PE=1 SV=1	4.39761	6.41712	sp|O43809|CPSF5_HUMAN	2.01951	1.06246	2.97656	5.40736	4.66895	0.000765388	0.00346884	-0.310971	0	45000000	133940000	82017000	502590000	516690000	1500700000	1487500000	913240000	4.15402	4.54908	4.28639	4.60095	5.61763	6.59243	6.75124	6.70717	4.39761	6.41712	2.01951	0.000765388	0.00346884
2290	sp|Q9NVC6|MED17_HUMAN	sp|Q9NVC6|MED17_HUMAN	7	sp|Q9NVC6|MED17_HUMAN Mediator of RNA polymerase II transcription subunit 17 OS=Homo sapiens GN=MED17 PE=1 SV=2	-2.59927	-0.583615	sp|Q9NVC6|MED17_HUMAN	2.01566	0.635368	3.39594	-1.59144	3.23114	0.00842588	0.0226224	-2.68564	0	635990	1569300	1435700	1726200	9410000	8071600	7638700	2808500	-2.1749	-1.96349	-1.89523	-4.36346	0.220444	-0.778888	-0.571104	-1.20491	-2.59927	-0.583615	2.01566	0.00842588	0.0226224
2089	sp|Q9BZJ0|CRNL1_HUMAN	sp|Q9BZJ0|CRNL1_HUMAN	15	sp|Q9BZJ0|CRNL1_HUMAN Crooked neck-like protein 1 OS=Homo sapiens GN=CRNKL1 PE=1 SV=4	-1.15575	0.859633	sp|Q9BZJ0|CRNL1_HUMAN	2.01539	0.695493	3.33528	-0.14806	3.37853	0.00652357	0.0183938	-2.43431	0	2086500	2833900	4133800	4537800	11465000	24019000	30826000	12394000	-0.409527	-1.09789	-0.279189	-2.83641	0.486588	0.759459	1.36675	0.825737	-1.15575	0.859633	2.01539	0.00652357	0.0183938
191	sp|O60244|MED14_HUMAN	sp|O60244|MED14_HUMAN	7	sp|O60244|MED14_HUMAN Mediator of RNA polymerase II transcription subunit 14 OS=Homo sapiens GN=MED14 PE=1 SV=2	-4.85022	-2.84251	sp|O60244|MED14_HUMAN	2.00771	-2.01255	6.02797	-3.24406	1.16382	0.279977	0.380176	-5.43218	3	NA	NA	NA	1268500	8845600	1034500	1696200	154860	NA	NA	NA	-4.85022	0.137105	-3.67705	-2.66134	-5.16876	-4.85022	-2.84251	2.00771	0.279977	0.380176
4	CON__P01966;zz|FGCZCont0141_P69906|HBA_PANPA;sp|P69905|HBA_HUMAN	CON__P01966	6	;zz|FGCZCont0141_P69906|HBA_PANPA blastpHomologue_2.0e-99;sp|P69905|HBA_HUMAN Hemoglobin subunit alpha OS=Homo sapiens GN=HBA1 PE=1 SV=2	-1.12036	0.884226	CON__P01966	2.00459	0.0631344	3.94604	-0.118068	2.28458	0.0441525	0.0863297	-4.27976	0	1070400	1244600	6119700	13641000	48944000	47614000	3436600	14608000	-1.40132	-2.30299	0.320314	-1.09745	2.44216	1.72477	-1.68057	1.05055	-1.12036	0.884226	2.00459	0.0441525	0.0863297
2510	sp|Q9Y2R4|DDX52_HUMAN	sp|Q9Y2R4|DDX52_HUMAN	11	sp|Q9Y2R4|DDX52_HUMAN Probable ATP-dependent RNA helicase DDX52 OS=Homo sapiens GN=DDX52 PE=1 SV=3	-2.23664	-0.234068	sp|Q9Y2R4|DDX52_HUMAN	2.00257	0.475358	3.52978	-1.23535	2.90133	0.0150032	0.0363901	-3.24855	0	231450	2371100	1673800	6577700	8910700	25506000	3052300	6381900	-3.6769	-1.35902	-1.66075	-2.24986	0.146985	0.844196	-1.84529	-0.0821645	-2.23664	-0.234068	2.00257	0.0150032	0.0363901
1454	sp|Q6I9Y2|THOC7_HUMAN	sp|Q6I9Y2|THOC7_HUMAN	5	sp|Q6I9Y2|THOC7_HUMAN THO complex subunit 7 homolog OS=Homo sapiens GN=THOC7 PE=1 SV=3	-4.3967	-2.39633	sp|Q6I9Y2|THOC7_HUMAN	2.00037	-0.497122	4.49786	-3.25363	1.79623	0.104115	0.169924	-4.97432	1	1310300	NA	147500	389260	1302200	2107500	2147200	1424000	-1.10083	NA	-5.37257	-6.71669	-2.44431	-2.67323	-2.33385	-2.13392	-4.3967	-2.39633	2.00037	0.104115	0.169924
2165	sp|Q9H6R4|NOL6_HUMAN	sp|Q9H6R4|NOL6_HUMAN	17	sp|Q9H6R4|NOL6_HUMAN Nucleolar protein 6 OS=Homo sapiens GN=NOL6 PE=1 SV=2	-0.159803	1.83851	sp|Q9H6R4|NOL6_HUMAN	1.99831	0.738912	3.25771	0.839351	3.51082	0.00519245	0.0153177	-2.20948	0	1027700	6534800	9921900	21729000	43741000	62900000	30197000	21952000	-1.46181	0.125731	1.05874	-0.361879	2.29072	2.11753	1.33811	1.60766	-0.159803	1.83851	1.99831	0.00519245	0.0153177
1756	sp|Q8WUQ7|CATIN_HUMAN	sp|Q8WUQ7|CATIN_HUMAN	17	sp|Q8WUQ7|CATIN_HUMAN Cactin OS=Homo sapiens GN=CACTIN PE=1 SV=3	-0.000761935	1.99133	sp|Q8WUQ7|CATIN_HUMAN	1.99209	0.835683	3.1485	0.995283	3.8116	0.00310971	0.010293	-1.70266	0	2050900	6440800	3690400	44766000	15922000	57174000	83559000	36456000	-0.435099	0.104511	-0.452572	0.780111	0.929074	1.98288	2.75186	2.30149	-0.000761935	1.99133	1.99209	0.00310971	0.010293
680	sp|P41252|SYIC_HUMAN	sp|P41252|SYIC_HUMAN	2	sp|P41252|SYIC_HUMAN Isoleucine--tRNA ligase, cytoplasmic OS=Homo sapiens GN=IARS PE=1 SV=2	-5.35614	-3.36451	sp|P41252|SYIC_HUMAN	1.99163	-0.0444217	4.02768	-4.55949	2.2796	0.0540251	0.101313	-4.15291	3	NA	384570	90744	640250	1192200	731580	NA	NA	NA	-4.02304	-6.11491	-5.93049	-2.56322	-4.16581	NA	NA	-5.35614	-3.36451	1.99163	0.0540251	0.101313
1960	sp|Q96SB8|SMC6_HUMAN	sp|Q96SB8|SMC6_HUMAN	6	sp|Q96SB8|SMC6_HUMAN Structural maintenance of chromosomes protein 6 OS=Homo sapiens GN=SMC6 PE=1 SV=2	-6.42707	-4.44099	sp|Q96SB8|SMC6_HUMAN	1.98608	0.114084	3.85807	-5.29216	2.37929	0.0397772	0.0794197	-4.08581	1	19855	NA	153040	408940	583120	1102900	99672	350300	-7.32621	NA	-5.31623	-6.63876	-3.52682	-3.58673	-6.59816	-4.05224	-6.42707	-4.44099	1.98608	0.0397772	0.0794197
2455	sp|Q9UM82|SPAT2_HUMAN	sp|Q9UM82|SPAT2_HUMAN	6	sp|Q9UM82|SPAT2_HUMAN Spermatogenesis-associated protein 2 OS=Homo sapiens GN=SPATA2 PE=1 SV=2	-3.55417	-1.57212	sp|Q9UM82|SPAT2_HUMAN	1.98205	0.202756	3.76135	-2.36494	2.596	0.033413	0.0695367	-3.69307	3	NA	507070	NA	2999900	NA	8237900	1542700	2874500	NA	-3.61805	NA	-3.49029	NA	-0.750119	-2.7931	-1.17314	-3.55417	-1.57212	1.98205	0.033413	0.0695367
313	sp|O95429|BAG4_HUMAN	sp|O95429|BAG4_HUMAN	4	sp|O95429|BAG4_HUMAN BAG family molecular chaperone regulator 4 OS=Homo sapiens GN=BAG4 PE=1 SV=1	-4.26157	-2.28178	sp|O95429|BAG4_HUMAN	1.9798	0.0939425	3.86565	-2.67774	2.44653	0.0419073	0.0828319	-3.76849	3	NA	326770	NA	NA	2712600	1934100	1875000	1211400	NA	-4.26157	NA	NA	-1.45552	-2.79435	-2.52214	-2.3551	-4.26157	-2.28178	1.9798	0.0419073	0.0828319
2193	sp|Q9HAF1|EAF6_HUMAN	sp|Q9HAF1|EAF6_HUMAN	3	sp|Q9HAF1|EAF6_HUMAN Chromatin modification-related protein MEAF6 OS=Homo sapiens GN=MEAF6 PE=1 SV=1	-2.92235	-0.943124	sp|Q9HAF1|EAF6_HUMAN	1.97923	0.718561	3.23989	-1.79136	3.52089	0.00593944	0.0170317	-2.23843	1	NA	393820	1053000	5944200	3238100	11123000	5401500	2867300	NA	-3.98823	-2.36896	-2.40986	-1.21693	-0.326532	-1.05247	-1.17657	-2.92235	-0.943124	1.97923	0.00593944	0.0170317
239	sp|O75376|NCOR1_HUMAN	sp|O75376|NCOR1_HUMAN	66	sp|O75376|NCOR1_HUMAN Nuclear receptor corepressor 1 OS=Homo sapiens GN=NCOR1 PE=1 SV=2	3.41395	5.38855	sp|O75376|NCOR1_HUMAN	1.9746	1.04992	2.89928	4.40125	4.72495	0.000700824	0.00323668	-0.22346	0	31284000	39162000	62723000	237610000	446060000	711380000	533570000	318920000	3.6138	2.74813	3.87656	3.41734	5.41958	5.53938	5.32714	5.26812	3.41395	5.38855	1.9746	0.000700824	0.00323668
1365	sp|Q4VCS5|AMOT_HUMAN	sp|Q4VCS5|AMOT_HUMAN	54	sp|Q4VCS5|AMOT_HUMAN Angiomotin OS=Homo sapiens GN=AMOT PE=1 SV=1	4.33931	6.30809	sp|Q4VCS5|AMOT_HUMAN	1.96878	1.01772	2.91983	5.3237	4.58037	0.000880682	0.00388866	-0.450333	0	57599000	125900000	59169000	499310000	777590000	1828500000	783300000	694390000	4.52081	4.45841	3.78742	4.5906	6.16838	6.87113	5.86042	6.33243	4.33931	6.30809	1.96878	0.000880682	0.00388866
1228	sp|Q14839|CHD4_HUMAN	sp|Q14839|CHD4_HUMAN	60	sp|Q14839|CHD4_HUMAN Chromodomain-helicase-DNA-binding protein 4 OS=Homo sapiens GN=CHD4 PE=1 SV=2	3.54455	5.51256	sp|Q14839|CHD4_HUMAN	1.96801	1.04483	2.89119	4.52855	4.71684	0.000709811	0.00326936	-0.236112	0	29870000	54997000	56348000	279680000	687070000	827590000	511970000	267190000	3.54507	3.24545	3.71277	3.67489	6.00163	5.75283	5.26974	5.02604	3.54455	5.51256	1.96801	0.000709811	0.00326936
1324	sp|Q16630|CPSF6_HUMAN	sp|Q16630|CPSF6_HUMAN	15	sp|Q16630|CPSF6_HUMAN Cleavage and polyadenylation specificity factor subunit 6 OS=Homo sapiens GN=CPSF6 PE=1 SV=2	4.28591	6.25333	sp|Q16630|CPSF6_HUMAN	1.96742	0.912207	3.02264	5.26962	4.12539	0.00184122	0.00668505	-1.18287	0	38830000	110070000	69865000	609550000	416480000	1217100000	1297500000	997460000	3.93489	4.26162	4.04134	4.90579	5.32713	6.29695	6.56142	6.82783	4.28591	6.25333	1.96742	0.00184122	0.00668505
2287	sp|Q9NV31|IMP3_HUMAN	sp|Q9NV31|IMP3_HUMAN	6	sp|Q9NV31|IMP3_HUMAN U3 small nucleolar ribonucleoprotein protein IMP3 OS=Homo sapiens GN=IMP3 PE=1 SV=1	-2.1945	-0.228248	sp|Q9NV31|IMP3_HUMAN	1.96626	0.800511	3.132	-1.21138	3.73203	0.00355811	0.0114092	-1.83602	0	567330	1067300	2233300	4993500	6525600	21040000	4929900	6612900	-2.34465	-2.52807	-1.22007	-2.68521	-0.272753	0.572655	-1.17936	-0.0335289	-2.1945	-0.228248	1.96626	0.00355811	0.0114092
250	sp|O75494|SRS10_HUMAN	sp|O75494|SRS10_HUMAN	10	sp|O75494|SRS10_HUMAN Serine/arginine-rich splicing factor 10 OS=Homo sapiens GN=SRSF10 PE=1 SV=1	0.686666	2.65185	sp|O75494|SRS10_HUMAN	1.96519	0.953674	2.9767	1.66926	4.29874	0.00138568	0.00537862	-0.900599	0	6615800	5797100	8781100	40428000	44776000	135400000	62959000	49774000	1.30519	-0.0496998	0.872097	0.619073	2.32223	3.19909	2.35868	2.72742	0.686666	2.65185	1.96519	0.00138568	0.00537862
122	sp|O14979|HNRDL_HUMAN	sp|O14979|HNRDL_HUMAN	13	sp|O14979|HNRDL_HUMAN Heterogeneous nuclear ribonucleoprotein D-like OS=Homo sapiens GN=HNRNPDL PE=1 SV=3	2.65782	4.61983	sp|O14979|HNRDL_HUMAN	1.96201	0.870227	3.0538	3.63882	3.97625	0.00235856	0.00820974	-1.42861	0	9140100	30361000	58424000	151130000	255560000	436480000	269450000	193090000	1.78546	2.37532	3.76806	2.70242	4.66909	4.85031	4.37816	4.58176	2.65782	4.61983	1.96201	0.00235856	0.00820974
1179	sp|Q14004|CDK13_HUMAN	sp|Q14004|CDK13_HUMAN	14	sp|Q14004|CDK13_HUMAN Cyclin-dependent kinase 13 OS=Homo sapiens GN=CDK13 PE=1 SV=2	-2.56819	-0.613762	sp|Q14004|CDK13_HUMAN	1.95443	0.274197	3.63466	-1.59098	2.57371	0.0266662	0.0575775	-3.8025	0	168920	1329100	483670	21710000	2929400	12000000	8288500	4963600	-4.14488	-2.20679	-3.55783	-0.363261	-1.35192	-0.219472	-0.457703	-0.425951	-2.56819	-0.613762	1.95443	0.0266662	0.0575775
1153	sp|Q13501|SQSTM_HUMAN	sp|Q13501|SQSTM_HUMAN	5	sp|Q13501|SQSTM_HUMAN Sequestosome-1 OS=Homo sapiens GN=SQSTM1 PE=1 SV=1	-5.12584	-3.17229	sp|Q13501|SQSTM_HUMAN	1.95355	-0.68536	4.59245	-4.14906	1.68834	0.12741	0.201804	-5.07141	2	145760	25220	NA	4090700	906270	894910	1646500	NA	-4.364	-8.01322	NA	-3.00029	-2.9327	-3.88153	-2.70265	NA	-5.12584	-3.17229	1.95355	0.12741	0.201804
228	sp|O75151|PHF2_HUMAN	sp|O75151|PHF2_HUMAN	8	sp|O75151|PHF2_HUMAN Lysine-specific demethylase PHF2 OS=Homo sapiens GN=PHF2 PE=1 SV=4	-1.49849	0.450098	sp|O75151|PHF2_HUMAN	1.94859	0.176073	3.72111	0.0603798	2.56193	0.0351795	0.0723834	-3.60527	3	NA	NA	NA	10583000	14453000	12486000	16479000	11047000	NA	NA	NA	-1.49849	0.798647	-0.163466	0.496851	0.668362	-1.49849	0.450098	1.94859	0.0351795	0.0723834
69	sp|O00257|CBX4_HUMAN	sp|O00257|CBX4_HUMAN	8	sp|O00257|CBX4_HUMAN E3 SUMO-protein ligase CBX4 OS=Homo sapiens GN=CBX4 PE=1 SV=3	-2.61254	-0.666766	sp|O00257|CBX4_HUMAN	1.94577	0.1403	3.75124	-1.31536	2.45788	0.0376253	0.0764162	-3.89417	2	NA	NA	382410	11937000	5211300	7367600	11579000	2838600	NA	NA	-3.91679	-1.30828	-0.575785	-0.907627	0.00667716	-1.19033	-2.61254	-0.666766	1.94577	0.0376253	0.0764162
1727	sp|Q8TCU4|ALMS1_HUMAN	sp|Q8TCU4|ALMS1_HUMAN	3	sp|Q8TCU4|ALMS1_HUMAN Alstrom syndrome protein 1 OS=Homo sapiens GN=ALMS1 PE=1 SV=3	-4.99332	-3.04986	sp|Q8TCU4|ALMS1_HUMAN	1.94347	0.515913	3.37102	-3.82724	3.17265	0.0141794	0.0346411	-2.85931	3	NA	NA	229010	962520	978400	1876600	938710	NA	NA	NA	-4.7003	-5.28635	-2.82951	-2.83693	-3.48313	NA	-4.99332	-3.04986	1.94347	0.0141794	0.0346411
337	sp|O95816|BAG2_HUMAN	sp|O95816|BAG2_HUMAN	4	sp|O95816|BAG2_HUMAN BAG family molecular chaperone regulator 2 OS=Homo sapiens GN=BAG2 PE=1 SV=1	-1.84969	0.0930723	sp|O95816|BAG2_HUMAN	1.94276	0.476737	3.40878	-0.878307	2.93216	0.0142132	0.0346879	-3.19604	0	719580	1167000	1138000	16892000	27703000	6597500	6874600	9610700	-1.99141	-2.39728	-2.25034	-0.759723	1.67531	-1.06337	-0.717497	0.477846	-1.84969	0.0930723	1.94276	0.0142132	0.0346879
2219	sp|Q9HCS7|SYF1_HUMAN	sp|Q9HCS7|SYF1_HUMAN	18	sp|Q9HCS7|SYF1_HUMAN Pre-mRNA-splicing factor SYF1 OS=Homo sapiens GN=XAB2 PE=1 SV=2	-0.575181	1.35943	sp|Q9HCS7|SYF1_HUMAN	1.93461	0.687093	3.18213	0.392124	3.43127	0.00595515	0.017056	-2.34457	0	1940300	9120600	1489300	19192000	36724000	35918000	26723000	12963000	-0.517473	0.614008	-1.83922	-0.558037	2.05512	1.32711	1.16835	0.887135	-0.575181	1.35943	1.93461	0.00595515	0.017056
777	sp|P50750|CDK9_HUMAN	sp|P50750|CDK9_HUMAN	20	sp|P50750|CDK9_HUMAN Cyclin-dependent kinase 9 OS=Homo sapiens GN=CDK9 PE=1 SV=3	2.25425	4.18761	sp|P50750|CDK9_HUMAN	1.93336	0.833036	3.03369	3.22093	3.88777	0.00273527	0.00928811	-1.57554	0	16262000	34335000	9925600	156800000	130480000	287450000	226990000	193700000	2.64159	2.55548	1.05931	2.76062	3.76333	4.26107	4.13998	4.58607	2.25425	4.18761	1.93336	0.00273527	0.00928811
1709	sp|Q8NG31|CASC5_HUMAN	sp|Q8NG31|CASC5_HUMAN	20	sp|Q8NG31|CASC5_HUMAN Protein CASC5 OS=Homo sapiens GN=CASC5 PE=1 SV=3	-2.04171	-0.109465	sp|Q8NG31|CASC5_HUMAN	1.93225	0.397417	3.46708	-1.07559	2.78555	0.0183857	0.0428758	-3.44533	0	366660	1182600	2084800	10772000	28100000	14905000	5834000	2671700	-2.99327	-2.37783	-1.32522	-1.47053	1.69448	0.0863508	-0.945476	-1.27322	-2.04171	-0.109465	1.93225	0.0183857	0.0428758
1794	sp|Q92665|RT31_HUMAN	sp|Q92665|RT31_HUMAN	2	sp|Q92665|RT31_HUMAN 28S ribosomal protein S31, mitochondrial OS=Homo sapiens GN=MRPS31 PE=1 SV=3	-4.92175	-2.99344	sp|Q92665|RT31_HUMAN	1.92831	0.191724	3.66489	-3.63621	2.53245	0.0333824	0.0695345	-3.78009	2	NA	122440	329520	NA	1926500	1754300	1332800	331200	NA	-5.69924	-4.14426	NA	-1.9166	-2.932	-2.99624	-4.12893	-4.92175	-2.99344	1.92831	0.0333824	0.0695345
2187	sp|Q9H9B1|EHMT1_HUMAN	sp|Q9H9B1|EHMT1_HUMAN	20	sp|Q9H9B1|EHMT1_HUMAN Histone-lysine N-methyltransferase EHMT1 OS=Homo sapiens GN=EHMT1 PE=1 SV=4	-1.18304	0.742546	sp|Q9H9B1|EHMT1_HUMAN	1.92559	0.707701	3.14347	-0.220248	3.49837	0.00530489	0.0155522	-2.23061	0	1563800	2423100	1887600	13707000	42863000	19368000	14193000	6589000	-0.838023	-1.32725	-1.47706	-1.08983	2.2634	0.455846	0.289418	-0.0384814	-1.18304	0.742546	1.92559	0.00530489	0.0155522
785	sp|P51148|RAB5C_HUMAN	sp|P51148|RAB5C_HUMAN	5	sp|P51148|RAB5C_HUMAN Ras-related protein Rab-5C OS=Homo sapiens GN=RAB5C PE=1 SV=2	-2.41134	-0.488046	sp|P51148|RAB5C_HUMAN	1.92329	-0.554077	4.40067	-1.31231	1.74105	0.11374	0.183477	-5.053	1	NA	2034900	4665900	811040	7617200	13230000	8247900	2541600	NA	-1.58297	-0.0941594	-5.55689	-0.0643447	-0.081817	-0.464523	-1.3415	-2.41134	-0.488046	1.92329	0.11374	0.183477
434	sp|P11387|TOP1_HUMAN	sp|P11387|TOP1_HUMAN	34	sp|P11387|TOP1_HUMAN DNA topoisomerase 1 OS=Homo sapiens GN=TOP1 PE=1 SV=2	3.45614	5.37586	sp|P11387|TOP1_HUMAN	1.91972	0.952457	2.88698	4.416	4.39139	0.00119229	0.00481818	-0.751281	0	19831000	55823000	80015000	230920000	382690000	787070000	493130000	348800000	2.93642	3.26728	4.24863	3.37221	5.21312	5.68202	5.21766	5.39062	3.45614	5.37586	1.91972	0.00119229	0.00481818
1024	sp|Q01658|NC2B_HUMAN	sp|Q01658|NC2B_HUMAN	4	sp|Q01658|NC2B_HUMAN Protein Dr1 OS=Homo sapiens GN=DR1 PE=1 SV=1	-3.21895	-1.30107	sp|Q01658|NC2B_HUMAN	1.91789	-2.81128	6.64705	-1.78054	0.972644	0.365294	0.468021	-5.58849	4	NA	665910	NA	NA	22476000	680200	NA	3195700	NA	-3.21895	NA	NA	1.39358	-4.26854	NA	-1.02825	-3.21895	-1.30107	1.91789	0.365294	0.468021
1902	sp|Q96HA1|P121A_HUMAN	sp|Q96HA1|P121A_HUMAN	20	sp|Q96HA1|P121A_HUMAN Nuclear envelope pore membrane protein POM 121 OS=Homo sapiens GN=POM121 PE=1 SV=2	1.14334	3.05765	sp|Q96HA1|P121A_HUMAN	1.91431	0.481696	3.34693	2.10049	2.95659	0.0136168	0.0336146	-3.15438	0	4637600	8750700	5316900	199010000	58888000	130340000	143010000	56286000	0.777297	0.553372	0.105427	3.13725	2.69137	3.14536	3.49826	2.8956	1.14334	3.05765	1.91431	0.0136168	0.0336146
2206	sp|Q9HC52|CBX8_HUMAN	sp|Q9HC52|CBX8_HUMAN	8	sp|Q9HC52|CBX8_HUMAN Chromobox protein homolog 8 OS=Homo sapiens GN=CBX8 PE=1 SV=3	-2.10246	-0.191439	sp|Q9HC52|CBX8_HUMAN	1.91102	0.0184621	3.80357	-1.14695	2.23421	0.0481719	0.0923032	-4.3612	0	693000	584850	642320	30443000	2336400	26278000	20064000	3872200	-2.04734	-3.40905	-3.12433	0.170894	-1.65668	0.886261	0.770264	-0.765598	-2.10246	-0.191439	1.91102	0.0481719	0.0923032
621	sp|P33993|MCM7_HUMAN	sp|P33993|MCM7_HUMAN	12	sp|P33993|MCM7_HUMAN DNA replication licensing factor MCM7 OS=Homo sapiens GN=MCM7 PE=1 SV=4	-1.79085	0.114828	sp|P33993|MCM7_HUMAN	1.90568	0.861425	2.94994	-0.838012	4.03787	0.00212848	0.00753136	-1.32678	0	719020	1569300	1704800	10085000	15301000	20318000	6611900	5994000	-1.99257	-1.96349	-1.63271	-1.57465	0.87547	0.523397	-0.771616	-0.167938	-1.79085	0.114828	1.90568	0.00212848	0.00753136
2144	sp|Q9H334|FOXP1_HUMAN	sp|Q9H334|FOXP1_HUMAN	4	sp|Q9H334|FOXP1_HUMAN Forkhead box protein P1 OS=Homo sapiens GN=FOXP1 PE=1 SV=1	-3.99203	-2.09197	sp|Q9H334|FOXP1_HUMAN	1.90007	-0.301083	4.10122	-2.85199	2.01167	0.0812189	0.139199	-4.53563	3	NA	509370	NA	1716200	4512300	4203900	NA	419110	NA	-3.61143	NA	-4.37264	-0.769839	-1.69913	NA	-3.80692	-3.99203	-2.09197	1.90007	0.0812189	0.139199
1983	sp|Q99550|MPP9_HUMAN	sp|Q99550|MPP9_HUMAN	6	sp|Q99550|MPP9_HUMAN M-phase phosphoprotein 9 OS=Homo sapiens GN=MPHOSPH9 PE=1 SV=4	-4.78851	-2.88885	sp|Q99550|MPP9_HUMAN	1.89967	-0.797445	4.59678	-3.52207	1.60634	0.144456	0.224434	-5.12934	2	183360	NA	NA	812510	113110	5710800	1673600	1724700	-4.02299	NA	NA	-5.55403	-5.73658	-1.26698	-2.67997	-1.87187	-4.78851	-2.88885	1.89967	0.144456	0.224434
709	sp|P46100|ATRX_HUMAN	sp|P46100|ATRX_HUMAN	10	sp|P46100|ATRX_HUMAN Transcriptional regulator ATRX OS=Homo sapiens GN=ATRX PE=1 SV=5	-2.9681	-1.07069	sp|P46100|ATRX_HUMAN	1.89741	0.62232	3.1725	-1.88386	3.33715	0.00802013	0.0217699	-2.53427	1	718340	479620	NA	3580500	4388300	7310100	6863500	1769300	-1.99397	-3.69956	NA	-3.21076	-0.807384	-0.91868	-0.719742	-1.83695	-2.9681	-1.07069	1.89741	0.00802013	0.0217699
21	REV__sp|P63010|AP2B1_HUMAN	REV__sp|P63010|AP2B1_HUMAN	2	sp|P63010|AP2B1_HUMAN AP-2 complex subunit beta OS=Homo sapiens GN=AP2B1 PE=1 SV=1	-3.55397	-1.65792	REV__sp|P63010|AP2B1_HUMAN	1.89604	-0.0395126	3.8316	-2.03713	2.28287	0.0537567	0.100927	-3.99932	3	NA	NA	NA	2881400	1463700	5846700	2515700	3268900	NA	NA	NA	-3.55397	-2.28678	-1.2338	-2.11385	-0.997269	-3.55397	-1.65792	1.89604	0.0537567	0.100927
507	sp|P19784|CSK22_HUMAN	sp|P19784|CSK22_HUMAN	14	sp|P19784|CSK22_HUMAN Casein kinase II subunit alpha OS=Homo sapiens GN=CSNK2A2 PE=1 SV=1	0.302598	2.19297	sp|P19784|CSK22_HUMAN	1.89037	0.908265	2.87248	1.24778	4.2589	0.0014787	0.00563769	-0.965136	0	2960600	6918900	4519200	52556000	43366000	68710000	73833000	22986000	0.110405	0.20938	-0.142976	1.03358	2.27912	2.24216	2.57998	1.67062	0.302598	2.19297	1.89037	0.0014787	0.00563769
71	sp|O00267|SPT5H_HUMAN	sp|O00267|SPT5H_HUMAN	10	sp|O00267|SPT5H_HUMAN Transcription elongation factor SPT5 OS=Homo sapiens GN=SUPT5H PE=1 SV=1	-2.88898	-0.999985	sp|O00267|SPT5H_HUMAN	1.88899	-0.379147	4.15713	-1.37778	1.94088	0.0904171	0.151551	-4.47358	3	NA	834190	NA	NA	1956700	17694000	4044600	3314500	NA	-2.88898	NA	NA	-1.89564	0.328325	-1.4543	-0.97832	-2.88898	-0.999985	1.88899	0.0904171	0.151551
657	sp|P38398|BRCA1_HUMAN	sp|P38398|BRCA1_HUMAN	10	sp|P38398|BRCA1_HUMAN Breast cancer type 1 susceptibility protein OS=Homo sapiens GN=BRCA1 PE=1 SV=2	-3.08488	-1.19673	sp|P38398|BRCA1_HUMAN	1.88815	0.613889	3.16241	-2.1408	3.27859	0.00775831	0.0211427	-2.60466	0	218500	595420	487700	9620900	5457200	6613600	2618200	2913000	-3.76246	-3.38282	-3.54515	-1.64908	-0.513662	-1.05993	-2.05837	-1.15494	-3.08488	-1.19673	1.88815	0.00775831	0.0211427
1967	sp|Q96T37|RBM15_HUMAN	sp|Q96T37|RBM15_HUMAN	22	sp|Q96T37|RBM15_HUMAN Putative RNA-binding protein 15 OS=Homo sapiens GN=RBM15 PE=1 SV=2	0.690468	2.57708	sp|Q96T37|RBM15_HUMAN	1.88661	0.864084	2.90914	1.63378	4.0824	0.00197689	0.00709036	-1.25345	0	2834900	15758000	5430400	57056000	48860000	77770000	80164000	50875000	0.0459374	1.41485	0.137704	1.16338	2.43984	2.41689	2.69425	2.75735	0.690468	2.57708	1.88661	0.00197689	0.00709036
2603	zz|FGCZCont0159_Q2EF73|UBC9_ICTTR;sp|P63279|UBC9_HUMAN	zz|FGCZCont0159_Q2EF73|UBC9_ICTTR	7	zz|FGCZCont0159_Q2EF73|UBC9_ICTTR blastpHomologue_2.0e-117;sp|P63279|UBC9_HUMAN SUMO-conjugating enzyme UBC9 OS=Homo sapiens GN=UBE2I PE=1 SV=1	-0.794121	1.09169	zz|FGCZCont0159_Q2EF73|UBC9_ICTTR	1.88581	0.705197	3.06642	0.148784	3.53427	0.00498742	0.0148991	-2.16974	0	2163100	4411900	2147000	13700000	47336000	27946000	16057000	10026000	-0.355953	-0.449602	-1.28029	-1.09063	2.39714	0.973077	0.460817	0.535712	-0.794121	1.09169	1.88581	0.00498742	0.0148991
1570	sp|Q86U86|PB1_HUMAN	sp|Q86U86|PB1_HUMAN	13	sp|Q86U86|PB1_HUMAN Protein polybromo-1 OS=Homo sapiens GN=PBRM1 PE=1 SV=1	-3.86237	-1.9799	sp|Q86U86|PB1_HUMAN	1.88248	-1.27188	5.03683	-2.92114	1.36106	0.208302	0.301776	-5.49393	2	58961	NA	200760	14724000	8048300	3949200	575710	NA	-5.70889	NA	-4.90148	-0.976747	0.00983168	-1.7873	-4.16222	NA	-3.86237	-1.9799	1.88248	0.208302	0.301776
2202	sp|Q9HBM6|TAF9B_HUMAN	sp|Q9HBM6|TAF9B_HUMAN	10	sp|Q9HBM6|TAF9B_HUMAN Transcription initiation factor TFIID subunit 9B OS=Homo sapiens GN=TAF9B PE=1 SV=1	-0.554763	1.32697	sp|Q9HBM6|TAF9B_HUMAN	1.88173	0.453937	3.30953	0.386104	2.91609	0.0146197	0.0356062	-3.22342	0	475040	7311600	4608900	31248000	26355000	32012000	30229000	16241000	-2.60847	0.290232	-0.112942	0.212129	1.6081	1.1647	1.33958	1.1955	-0.554763	1.32697	1.88173	0.0146197	0.0356062
2448	sp|Q9ULV3|CIZ1_HUMAN	sp|Q9ULV3|CIZ1_HUMAN	11	sp|Q9ULV3|CIZ1_HUMAN Cip1-interacting zinc finger protein OS=Homo sapiens GN=CIZ1 PE=1 SV=2	-2.3843	-0.502609	sp|Q9ULV3|CIZ1_HUMAN	1.88169	0.203908	3.55946	-1.44345	2.48154	0.0313351	0.0658434	-3.9562	0	548600	846730	525400	16013000	23670000	6846000	6261900	2080400	-2.39454	-2.86712	-3.43136	-0.844154	1.46332	-1.01121	-0.847161	-1.61539	-2.3843	-0.502609	1.88169	0.0313351	0.0658434
72	sp|O00268|TAF4_HUMAN	sp|O00268|TAF4_HUMAN	4	sp|O00268|TAF4_HUMAN Transcription initiation factor TFIID subunit 4 OS=Homo sapiens GN=TAF4 PE=1 SV=2	-5.45424	-3.57847	sp|O00268|TAF4_HUMAN	1.87577	-0.15726	3.9088	-4.38237	2.06915	0.0666977	0.119415	-4.56951	1	91884	NA	30460	2925400	389580	1657000	1285800	317890	-5.04966	NA	-7.78304	-3.53002	-4.07025	-3.01249	-3.04611	-4.18503	-5.45424	-3.57847	1.87577	0.0666977	0.119415
1512	sp|Q6ZWJ1|STXB4_HUMAN	sp|Q6ZWJ1|STXB4_HUMAN	4	sp|Q6ZWJ1|STXB4_HUMAN Syntaxin-binding protein 4 OS=Homo sapiens GN=STXBP4 PE=1 SV=2	-4.07134	-2.19718	sp|Q6ZWJ1|STXB4_HUMAN	1.87416	-0.600159	4.34847	-3.13426	1.81663	0.11507	0.184825	-4.74137	4	NA	254750	NA	2950600	NA	1171000	6062300	NA	NA	-4.62621	NA	-3.51647	NA	-3.50221	-0.892157	NA	-4.07134	-2.19718	1.87416	0.11507	0.184825
538	sp|P24752|THIL_HUMAN	sp|P24752|THIL_HUMAN	4	sp|P24752|THIL_HUMAN Acetyl-CoA acetyltransferase, mitochondrial OS=Homo sapiens GN=ACAT1 PE=1 SV=1	-4.63703	-2.7738	sp|P24752|THIL_HUMAN	1.86322	-0.174034	3.90048	-3.51909	2.13136	0.0677084	0.120816	-4.36588	3	NA	NA	584610	610420	949460	1610500	2049100	NA	NA	NA	-3.26819	-6.00587	-2.86997	-3.05264	-2.3988	NA	-4.63703	-2.7738	1.86322	0.0677084	0.120816
1909	sp|Q96IX5|USMG5_HUMAN	sp|Q96IX5|USMG5_HUMAN	2	sp|Q96IX5|USMG5_HUMAN Up-regulated during skeletal muscle growth protein 5 OS=Homo sapiens GN=USMG5 PE=1 SV=1	-3.05359	-1.19166	sp|Q96IX5|USMG5_HUMAN	1.86193	0.146303	3.57755	-1.93643	2.52917	0.0369688	0.0754075	-3.79046	3	NA	NA	397440	6580100	3006900	4209500	7694600	NA	NA	NA	-3.85788	-2.24929	-1.31674	-1.69726	-0.560976	NA	-3.05359	-1.19166	1.86193	0.0369688	0.0754075
1982	sp|Q99549|MPP8_HUMAN	sp|Q99549|MPP8_HUMAN	6	sp|Q99549|MPP8_HUMAN M-phase phosphoprotein 8 OS=Homo sapiens GN=MPHOSPH8 PE=1 SV=2	-2.92782	-1.06774	sp|Q99549|MPP8_HUMAN	1.86008	0.238599	3.48156	-1.99778	2.53822	0.0283769	0.0606059	-3.86183	0	107520	872020	1653200	6013900	3377400	6801400	2265600	7667800	-4.81614	-2.82402	-1.67968	-2.39144	-1.16018	-1.02043	-2.25929	0.168922	-2.92782	-1.06774	1.86008	0.0283769	0.0606059
1925	sp|Q96L73|NSD1_HUMAN	sp|Q96L73|NSD1_HUMAN	14	sp|Q96L73|NSD1_HUMAN Histone-lysine N-methyltransferase, H3 lysine-36 and H4 lysine-20 specific OS=Homo sapiens GN=NSD1 PE=1 SV=1	-1.51151	0.348156	sp|Q96L73|NSD1_HUMAN	1.85966	0.0489655	3.67036	-0.581676	2.27246	0.0450889	0.0877969	-4.2994	0	850400	436230	5450400	18598000	23027000	9527900	11167000	10168000	-1.7432	-3.83844	0.143322	-0.60771	1.42621	-0.544893	-0.0436469	0.554949	-1.51151	0.348156	1.85966	0.0450889	0.0877969
1377	sp|Q53SF7|COBL1_HUMAN	sp|Q53SF7|COBL1_HUMAN	6	sp|Q53SF7|COBL1_HUMAN Cordon-bleu protein-like 1 OS=Homo sapiens GN=COBLL1 PE=1 SV=2	-0.41153	1.44158	sp|Q53SF7|COBL1_HUMAN	1.85311	-2.14991	5.85612	-0.0409089	1.07883	0.313943	0.413682	-5.51941	3	2280000	512810	10197000	55957000	NA	38954000	NA	NA	-0.277744	-3.60157	1.10054	1.13265	NA	1.44158	NA	NA	-0.41153	1.44158	1.85311	0.313943	0.413682
2123	sp|Q9H0U3|MAGT1_HUMAN	sp|Q9H0U3|MAGT1_HUMAN	8	sp|Q9H0U3|MAGT1_HUMAN Magnesium transporter protein 1 OS=Homo sapiens GN=MAGT1 PE=1 SV=1	-0.283528	1.56856	sp|Q9H0U3|MAGT1_HUMAN	1.85209	0.644147	3.06003	0.510224	3.43852	0.00679253	0.01896	-2.37074	1	1062800	7025500	4581300	30390000	NA	46101000	36529000	19193000	-1.41191	0.231772	-0.122121	0.168141	NA	1.67921	1.60253	1.42394	-0.283528	1.56856	1.85209	0.00679253	0.01896
1621	sp|Q8IX01|SUGP2_HUMAN	sp|Q8IX01|SUGP2_HUMAN	29	sp|Q8IX01|SUGP2_HUMAN SURP and G-patch domain-containing protein 2 OS=Homo sapiens GN=SUGP2 PE=1 SV=2	0.630572	2.48104	sp|Q8IX01|SUGP2_HUMAN	1.85047	0.543934	3.157	1.55581	3.13379	0.00998506	0.0258385	-2.85189	0	4068000	11363000	2968700	84768000	93991000	60824000	59873000	34949000	0.582573	0.935958	-0.785105	1.78886	3.32135	2.07018	2.28887	2.24375	0.630572	2.48104	1.85047	0.00998506	0.0258385
1673	sp|Q8N9T8|KRI1_HUMAN	sp|Q8N9T8|KRI1_HUMAN	7	sp|Q8N9T8|KRI1_HUMAN Protein KRI1 homolog OS=Homo sapiens GN=KRI1 PE=1 SV=3	-1.35322	0.492056	sp|Q8N9T8|KRI1_HUMAN	1.84527	0.330556	3.35999	-0.43058	2.69549	0.0215363	0.0487098	-3.59773	0	475000	1227100	4357600	22857000	17116000	25928000	6938400	11978000	-2.60859	-2.32373	-0.19862	-0.281918	1.02651	0.867346	-0.704666	0.779038	-1.35322	0.492056	1.84527	0.0215363	0.0487098
1691	sp|Q8NDD1|CA131_HUMAN	sp|Q8NDD1|CA131_HUMAN	8	sp|Q8NDD1|CA131_HUMAN Uncharacterized protein C1orf131 OS=Homo sapiens GN=C1orf131 PE=1 SV=3	-1.65581	0.182003	sp|Q8NDD1|CA131_HUMAN	1.83781	0.679022	2.9966	-0.736903	3.50918	0.00520715	0.0153228	-2.21227	0	1156300	2710100	1942600	4822900	10948000	8204600	14956000	11283000	-1.28661	-1.16331	-1.43317	-2.74014	0.424417	-0.755832	0.362152	0.697275	-1.65581	0.182003	1.83781	0.00520715	0.0153228
2130	sp|Q9H1D9|RPC6_HUMAN	sp|Q9H1D9|RPC6_HUMAN	3	sp|Q9H1D9|RPC6_HUMAN DNA-directed RNA polymerase III subunit RPC6 OS=Homo sapiens GN=POLR3F PE=1 SV=1	-5.25382	-3.4229	sp|Q9H1D9|RPC6_HUMAN	1.83091	-0.345527	4.00735	-3.88063	2.01761	0.0862503	0.146019	-4.36585	4	NA	NA	159420	NA	NA	760390	1724200	517380	NA	NA	-5.25382	NA	NA	-4.11132	-2.6386	-3.51879	-5.25382	-3.4229	1.83091	0.0862503	0.146019
649	sp|P36873|PP1G_HUMAN	sp|P36873|PP1G_HUMAN	18	sp|P36873|PP1G_HUMAN Serine/threonine-protein phosphatase PP1-gamma catalytic subunit OS=Homo sapiens GN=PPP1CC PE=1 SV=1	-0.123333	1.70754	sp|P36873|PP1G_HUMAN	1.83087	0.0816716	3.58008	0.792104	2.31594	0.0418159	0.0827205	-4.22876	0	9395200	1429100	2287900	50292000	24844000	41764000	52433000	22762000	1.82636	-2.10055	-1.18316	0.964013	1.52855	1.53984	2.10456	1.65722	-0.123333	1.70754	1.83087	0.0418159	0.0827205
471	sp|P15927|RFA2_HUMAN	sp|P15927|RFA2_HUMAN	10	sp|P15927|RFA2_HUMAN Replication protein A 32 kDa subunit OS=Homo sapiens GN=RPA2 PE=1 SV=1	0.658965	2.48823	sp|P15927|RFA2_HUMAN	1.82926	0.563236	3.09529	1.5736	3.197	0.00894228	0.0237368	-2.74394	0	3626400	10955000	10316000	31471000	15374000	115150000	107060000	60944000	0.411823	0.882404	1.11827	0.223364	0.881883	2.97056	3.09611	3.00436	0.658965	2.48823	1.82926	0.00894228	0.0237368
2376	sp|Q9UBW7|ZMYM2_HUMAN	sp|Q9UBW7|ZMYM2_HUMAN	11	sp|Q9UBW7|ZMYM2_HUMAN Zinc finger MYM-type protein 2 OS=Homo sapiens GN=ZMYM2 PE=1 SV=1	-2.18194	-0.354479	sp|Q9UBW7|ZMYM2_HUMAN	1.82746	0.706935	2.94799	-1.26821	3.60857	0.00439115	0.0134936	-2.04402	0	499640	1692600	1298500	6401000	13846000	10509000	4348500	5064400	-2.53345	-1.85271	-2.04872	-2.29289	0.740837	-0.406635	-1.35367	-0.398451	-2.18194	-0.354479	1.82746	0.00439115	0.0134936
186	sp|O43818|U3IP2_HUMAN	sp|O43818|U3IP2_HUMAN	8	sp|O43818|U3IP2_HUMAN U3 small nucleolar RNA-interacting protein 2 OS=Homo sapiens GN=RRP9 PE=1 SV=1	-1.12599	0.700779	sp|O43818|U3IP2_HUMAN	1.82677	-0.413523	4.06706	-0.0821219	1.82867	0.0988131	0.162962	-4.92753	1	436500	NA	4670300	19277000	31784000	29293000	2945500	25228000	-2.73419	NA	-0.0927191	-0.551055	1.86047	1.03948	-1.89476	1.79792	-1.12599	0.700779	1.82677	0.0988131	0.162962
516	sp|P21675|TAF1_HUMAN;sp|Q8IZX4|TAF1L_HUMAN	sp|P21675|TAF1_HUMAN	3	sp|P21675|TAF1_HUMAN Transcription initiation factor TFIID subunit 1 OS=Homo sapiens GN=TAF1 PE=1 SV=2;sp|Q8IZX4|TAF1L_HUMAN Transcription initiation factor TFIID subunit 1-like OS=Homo sapiens GN=TAF1L PE=1 SV=1	-6.13404	-4.30975	sp|P21675|TAF1_HUMAN	1.8243	-1.33879	4.98738	-5.22189	1.38325	0.211929	0.305061	-5.28277	4	NA	NA	57291	867590	1373400	NA	128350	NA	NA	NA	-6.81768	-5.4504	-2.37258	NA	-6.24691	NA	-6.13404	-4.30975	1.8243	0.211929	0.305061
1597	sp|Q86YP4|P66A_HUMAN	sp|Q86YP4|P66A_HUMAN	22	sp|Q86YP4|P66A_HUMAN Transcriptional repressor p66-alpha OS=Homo sapiens GN=GATAD2A PE=1 SV=1	1.27925	3.10174	sp|Q86YP4|P66A_HUMAN	1.82249	0.949613	2.69537	2.19049	4.61977	0.00082728	0.0036907	-0.3882	0	6841300	15497000	9784200	63571000	98091000	100760000	94616000	76838000	1.355	1.39039	1.03739	1.33421	3.37888	2.78224	2.92448	3.32135	1.27925	3.10174	1.82249	0.00082728	0.0036907
959	sp|P63208|SKP1_HUMAN	sp|P63208|SKP1_HUMAN	10	sp|P63208|SKP1_HUMAN S-phase kinase-associated protein 1 OS=Homo sapiens GN=SKP1 PE=1 SV=2	0.492541	2.3101	sp|P63208|SKP1_HUMAN	1.81756	0.741324	2.8938	1.40132	3.73672	0.00352995	0.0113497	-1.82815	0	3769500	12194000	5206100	34933000	51621000	124130000	60552000	18123000	0.469331	1.03933	0.0732456	0.388257	2.51391	3.07649	2.30453	1.34548	0.492541	2.3101	1.81756	0.00352995	0.0113497
2078	sp|Q9BY77|PDIP3_HUMAN	sp|Q9BY77|PDIP3_HUMAN	27	sp|Q9BY77|PDIP3_HUMAN Polymerase delta-interacting protein 3 OS=Homo sapiens GN=POLDIP3 PE=1 SV=2	2.86946	4.66996	sp|Q9BY77|PDIP3_HUMAN	1.8005	0.679173	2.92182	3.76971	3.55279	0.00483134	0.0145063	-2.13836	0	14709000	49772000	18828000	312160000	174100000	325210000	468710000	251930000	2.49245	3.09925	2.03765	3.84848	4.15193	4.43518	5.14712	4.9456	2.86946	4.66996	1.8005	0.00483134	0.0145063
2272	sp|Q9NSY1|BMP2K_HUMAN	sp|Q9NSY1|BMP2K_HUMAN	7	sp|Q9NSY1|BMP2K_HUMAN BMP-2-inducible protein kinase OS=Homo sapiens GN=BMP2K PE=1 SV=2	-2.84569	-1.05198	sp|Q9NSY1|BMP2K_HUMAN	1.7937	-0.941772	4.52918	-2.24779	1.49547	0.170778	0.256221	-5.27345	2	400890	2391900	359590	3685600	NA	NA	1103400	15763000	-2.86065	-1.34623	-4.01082	-3.16505	NA	NA	-3.25861	1.15464	-2.84569	-1.05198	1.7937	0.170778	0.256221
734	sp|P48729|KC1A_HUMAN	sp|P48729|KC1A_HUMAN	14	sp|P48729|KC1A_HUMAN Casein kinase I isoform alpha OS=Homo sapiens GN=CSNK1A1 PE=1 SV=2	0.490075	2.28334	sp|P48729|KC1A_HUMAN	1.79327	0.737784	2.84875	1.38671	3.75926	0.00339754	0.011014	-1.79031	0	2789200	8991600	7290000	44134000	25714000	49736000	105150000	48824000	0.0217883	0.593145	0.587719	0.757647	1.57492	1.78628	3.07111	2.70106	0.490075	2.28334	1.79327	0.00339754	0.011014
753	sp|P49674|KC1E_HUMAN	sp|P49674|KC1E_HUMAN	15	sp|P49674|KC1E_HUMAN Casein kinase I isoform epsilon OS=Homo sapiens GN=CSNK1E PE=1 SV=1	-0.216447	1.57203	sp|P49674|KC1E_HUMAN	1.78847	0.643446	2.9335	0.67779	3.45601	0.00570635	0.0165036	-2.30252	0	2527300	4645900	3912200	27257000	10091000	44989000	72865000	24666000	-0.124729	-0.373914	-0.363383	-0.00376324	0.314588	1.64477	2.56165	1.7671	-0.216447	1.57203	1.78847	0.00570635	0.0165036
826	sp|P53680|AP2S1_HUMAN	sp|P53680|AP2S1_HUMAN	3	sp|P53680|AP2S1_HUMAN AP-2 complex subunit sigma OS=Homo sapiens GN=AP2S1 PE=1 SV=2	-2.16901	-0.380558	sp|P53680|AP2S1_HUMAN	1.78845	0.395272	3.18163	-1.27478	2.8404	0.0166973	0.0399247	-3.35222	0	211150	3970800	1451600	6055900	5512100	11694000	10313000	4332400	-3.8133	-0.603876	-1.8784	-2.38045	-0.500175	-0.255912	-0.154154	-0.611991	-2.16901	-0.380558	1.78845	0.0166973	0.0399247
2117	sp|Q9H0D6|XRN2_HUMAN	sp|Q9H0D6|XRN2_HUMAN	30	sp|Q9H0D6|XRN2_HUMAN 5-3 exoribonuclease 2 OS=Homo sapiens GN=XRN2 PE=1 SV=1	1.64899	3.43713	sp|Q9H0D6|XRN2_HUMAN	1.78814	0.841206	2.73507	2.54306	4.17822	0.00168774	0.00627254	-1.09646	0	5493700	16965000	19583000	93648000	107900000	153550000	107410000	106200000	1.02902	1.52294	2.09773	1.94626	3.5073	3.37654	3.10064	3.76402	1.64899	3.43713	1.78814	0.00168774	0.00627254
2246	sp|Q9NQC7|CYLD_HUMAN	sp|Q9NQC7|CYLD_HUMAN	10	sp|Q9NQC7|CYLD_HUMAN Ubiquitin carboxyl-terminal hydrolase CYLD OS=Homo sapiens GN=CYLD PE=1 SV=1	-2.17339	-0.388586	sp|Q9NQC7|CYLD_HUMAN	1.7848	-0.153518	3.72312	-0.983519	2.10002	0.0667407	0.119415	-4.43312	2	1115800	NA	NA	4072900	2959800	33114000	5432100	5117600	-1.33959	NA	NA	-3.00718	-1.33801	1.21245	-1.04462	-0.384157	-2.17339	-0.388586	1.7848	0.0667407	0.119415
1118	sp|Q13112|CAF1B_HUMAN	sp|Q13112|CAF1B_HUMAN	13	sp|Q13112|CAF1B_HUMAN Chromatin assembly factor 1 subunit B OS=Homo sapiens GN=CHAF1B PE=1 SV=1	-0.369937	1.4131	sp|Q13112|CAF1B_HUMAN	1.78304	0.370368	3.19571	0.521582	2.79273	0.0181554	0.0424646	-3.43316	0	1485200	1747700	6435700	46597000	15294000	72985000	30715000	15019000	-0.914651	-1.80579	0.39725	0.843447	0.874853	2.32731	1.36174	1.0885	-0.369937	1.4131	1.78304	0.0181554	0.0424646
1450	sp|Q6DKI1|RL7L_HUMAN	sp|Q6DKI1|RL7L_HUMAN	10	sp|Q6DKI1|RL7L_HUMAN 60S ribosomal protein L7-like 1 OS=Homo sapiens GN=RPL7L1 PE=1 SV=1	-1.36409	0.418786	sp|Q6DKI1|RL7L_HUMAN	1.78288	-0.237416	3.80317	-0.472652	1.95261	0.0779093	0.134782	-4.80376	0	250770	2920400	8892000	9105900	17259000	45598000	5001500	7469200	-3.55777	-1.05386	0.891275	-1.736	1.03772	1.66374	-1.15934	0.133027	-1.36409	0.418786	1.78288	0.0779093	0.134782
2138	sp|Q9H2P0|ADNP_HUMAN	sp|Q9H2P0|ADNP_HUMAN	43	sp|Q9H2P0|ADNP_HUMAN Activity-dependent neuroprotector homeobox protein OS=Homo sapiens GN=ADNP PE=1 SV=1	2.87555	4.65411	sp|Q9H2P0|ADNP_HUMAN	1.77855	0.836935	2.72017	3.76483	4.17927	0.00168483	0.00627254	-1.09474	0	12067000	44657000	31987000	252920000	248330000	379070000	327500000	208300000	2.19826	2.94043	2.84753	3.51599	4.63042	4.65137	4.64916	4.68547	2.87555	4.65411	1.77855	0.00168483	0.00627254
2135	sp|Q9H2H8|PPIL3_HUMAN	sp|Q9H2H8|PPIL3_HUMAN	6	sp|Q9H2H8|PPIL3_HUMAN Peptidyl-prolyl cis-trans isomerase-like 3 OS=Homo sapiens GN=PPIL3 PE=1 SV=1	-1.15897	0.61744	sp|Q9H2H8|PPIL3_HUMAN	1.77641	0.327355	3.22546	-0.270763	2.71248	0.0209032	0.0475465	-3.56903	0	1003700	2779200	978090	36770000	12728000	25214000	8869600	18559000	-1.49692	-1.12644	-2.48173	0.46923	0.627397	0.827953	-0.363582	1.37799	-1.15897	0.61744	1.77641	0.0209032	0.0475465
2213	sp|Q9HCJ3|RAVR2_HUMAN	sp|Q9HCJ3|RAVR2_HUMAN	5	sp|Q9HCJ3|RAVR2_HUMAN Ribonucleoprotein PTB-binding 2 OS=Homo sapiens GN=RAVER2 PE=1 SV=2	-3.15525	-1.37885	sp|Q9HCJ3|RAVR2_HUMAN	1.7764	0.354159	3.19864	-2.14016	2.80107	0.0195745	0.0452485	-3.40599	1	307250	716130	NA	3847000	1893100	14705000	1956500	2861200	-3.25594	-3.11247	NA	-3.09733	-1.94017	0.0672936	-2.46303	-1.17948	-3.15525	-1.37885	1.7764	0.0195745	0.0452485
1084	sp|Q12788|TBL3_HUMAN	sp|Q12788|TBL3_HUMAN	18	sp|Q12788|TBL3_HUMAN Transducin beta-like protein 3 OS=Homo sapiens GN=TBL3 PE=1 SV=2	1.09852	2.87151	sp|Q12788|TBL3_HUMAN	1.773	0.303389	3.2426	1.98502	2.66941	0.0225454	0.0502427	-3.64172	0	2545700	7950500	34407000	56080000	89440000	159820000	57921000	43903000	-0.11395	0.412922	2.95897	1.13612	3.25448	3.433	2.24283	2.55574	1.09852	2.87151	1.773	0.0225454	0.0502427
1904	sp|Q96HR3|MED30_HUMAN	sp|Q96HR3|MED30_HUMAN	2	sp|Q96HR3|MED30_HUMAN Mediator of RNA polymerase II transcription subunit 30 OS=Homo sapiens GN=MED30 PE=1 SV=1	-4.78499	-3.01468	sp|Q96HR3|MED30_HUMAN	1.77031	0.413213	3.12742	-3.60478	2.97507	0.0164808	0.0394469	-3.09956	2	NA	282460	176880	NA	1320500	1437500	816700	911790	NA	-4.47499	-5.095	NA	-2.4255	-3.21295	-3.67653	-2.74373	-4.78499	-3.01468	1.77031	0.0164808	0.0394469
1630	sp|Q8IY18|SMC5_HUMAN	sp|Q8IY18|SMC5_HUMAN	4	sp|Q8IY18|SMC5_HUMAN Structural maintenance of chromosomes protein 5 OS=Homo sapiens GN=SMC5 PE=1 SV=2	-4.64483	-2.87652	sp|Q8IY18|SMC5_HUMAN	1.7683	0.203682	3.33292	-3.76068	2.57755	0.0310532	0.0654335	-3.75628	2	NA	159360	291350	1809700	1965700	787790	1675100	NA	NA	-5.31326	-4.33239	-4.28883	-1.88946	-4.06138	-2.67873	NA	-4.64483	-2.87652	1.7683	0.0310532	0.0654335
246	sp|O75461|E2F6_HUMAN	sp|O75461|E2F6_HUMAN	4	sp|O75461|E2F6_HUMAN Transcription factor E2F6 OS=Homo sapiens GN=E2F6 PE=1 SV=1	-4.96186	-3.1941	sp|O75461|E2F6_HUMAN	1.76776	-0.884311	4.41982	-4.37261	1.52019	0.164564	0.248478	-5.24181	2	95668	294690	143670	1130600	4580800	257530	NA	NA	-4.98969	-4.41291	-5.41278	-5.03206	-0.749538	-5.63867	NA	NA	-4.96186	-3.1941	1.76776	0.164564	0.248478
1714	sp|Q8NI36|WDR36_HUMAN	sp|Q8NI36|WDR36_HUMAN	26	sp|Q8NI36|WDR36_HUMAN WD repeat-containing protein 36 OS=Homo sapiens GN=WDR36 PE=1 SV=1	1.03941	2.8048	sp|Q8NI36|WDR36_HUMAN	1.76538	0.444318	3.08645	1.9221	2.95681	0.0136116	0.0336146	-3.15401	0	2619500	7867200	22135000	72723000	97658000	141210000	52583000	41519000	-0.0714854	0.397496	2.28493	1.54672	3.37292	3.25836	2.10853	2.47938	1.03941	2.8048	1.76538	0.0136116	0.0336146
2374	sp|Q9UBU9|NXF1_HUMAN	sp|Q9UBU9|NXF1_HUMAN	16	sp|Q9UBU9|NXF1_HUMAN Nuclear RNA export factor 1 OS=Homo sapiens GN=NXF1 PE=1 SV=1	-1.11678	0.646355	sp|Q9UBU9|NXF1_HUMAN	1.76313	0.467581	3.05868	-0.235211	3.0112	0.0123738	0.0309672	-3.06123	0	1424400	5237200	1014900	15787000	5669900	27587000	25353000	14052000	-0.976761	-0.198457	-2.42528	-0.866612	-0.462144	0.954838	1.09525	0.997473	-1.11678	0.646355	1.76313	0.0123738	0.0309672
2467	sp|Q9UNY4|TTF2_HUMAN	sp|Q9UNY4|TTF2_HUMAN	42	sp|Q9UNY4|TTF2_HUMAN Transcription termination factor 2 OS=Homo sapiens GN=TTF2 PE=1 SV=2	1.40525	3.1638	sp|Q9UNY4|TTF2_HUMAN	1.75856	0.55064	2.96647	2.28453	3.22128	0.00857178	0.0229358	-2.70247	0	4994700	9659100	11691000	153400000	88433000	183870000	130050000	39724000	0.887523	0.698022	1.30947	2.72598	3.23923	3.63075	3.36631	2.41892	1.40525	3.1638	1.75856	0.00857178	0.0229358
1689	sp|Q8ND82|Z280C_HUMAN	sp|Q8ND82|Z280C_HUMAN	18	sp|Q8ND82|Z280C_HUMAN Zinc finger protein 280C OS=Homo sapiens GN=ZNF280C PE=1 SV=1	0.68316	2.43732	sp|Q8ND82|Z280C_HUMAN	1.75416	0.505361	3.00296	1.56024	3.10803	0.0104448	0.0268302	-2.89589	0	4054400	4406100	8422500	85270000	56914000	110290000	33875000	48657000	0.577597	-0.451529	0.808383	1.79819	2.64543	2.90973	1.49776	2.69638	0.68316	2.43732	1.75416	0.0104448	0.0268302
1713	sp|Q8NI35|INADL_HUMAN	sp|Q8NI35|INADL_HUMAN	10	sp|Q8NI35|INADL_HUMAN InaD-like protein OS=Homo sapiens GN=INADL PE=1 SV=3	-6.08478	-4.33314	sp|Q8NI35|INADL_HUMAN	1.75164	-0.811248	4.31453	-4.68347	1.59277	0.152147	0.233009	-4.93179	3	NA	NA	NA	580680	562560	1601600	287900	115310	NA	NA	NA	-6.08478	-3.57518	-3.06046	-5.1248	-5.57214	-6.08478	-4.33314	1.75164	0.152147	0.233009
1443	sp|Q68CP9|ARID2_HUMAN	sp|Q68CP9|ARID2_HUMAN	8	sp|Q68CP9|ARID2_HUMAN AT-rich interactive domain-containing protein 2 OS=Homo sapiens GN=ARID2 PE=1 SV=2	-3.07294	-1.32688	sp|Q68CP9|ARID2_HUMAN	1.74606	-0.63901	4.13113	-1.9089	1.66962	0.131131	0.207419	-5.04469	2	NA	431530	NA	6406300	14222000	2704500	1382200	3728300	NA	-3.85431	NA	-2.29158	0.776938	-2.32138	-2.94569	-0.817399	-3.07294	-1.32688	1.74606	0.131131	0.207419
1519	sp|Q76L83|ASXL2_HUMAN	sp|Q76L83|ASXL2_HUMAN	2	sp|Q76L83|ASXL2_HUMAN Putative Polycomb group protein ASXL2 OS=Homo sapiens GN=ASXL2 PE=1 SV=1	-5.89226	-4.14985	sp|Q76L83|ASXL2_HUMAN	1.74241	-0.514799	3.99962	-4.58545	1.85137	0.109486	0.177586	-4.58275	4	52116	NA	NA	NA	659500	788930	NA	171490	-5.89226	NA	NA	NA	-3.36097	-4.05934	NA	-5.02924	-5.89226	-4.14985	1.74241	0.109486	0.177586
2512	sp|Q9Y2R9|RT07_HUMAN	sp|Q9Y2R9|RT07_HUMAN	2	sp|Q9Y2R9|RT07_HUMAN 28S ribosomal protein S7, mitochondrial OS=Homo sapiens GN=MRPS7 PE=1 SV=2	-4.06716	-2.33077	sp|Q9Y2R9|RT07_HUMAN	1.73639	0.644267	2.8285	-3.19896	3.51791	0.00512954	0.0151891	-2.19746	0	126270	269300	470200	2896900	2263200	2877800	2409500	645580	-4.57729	-4.54486	-3.60099	-3.54549	-1.69957	-2.23377	-2.17376	-3.21599	-4.06716	-2.33077	1.73639	0.00512954	0.0151891
1007	sp|P98175|RBM10_HUMAN	sp|P98175|RBM10_HUMAN	42	sp|P98175|RBM10_HUMAN RNA-binding protein 10 OS=Homo sapiens GN=RBM10 PE=1 SV=3	3.46895	5.19955	sp|P98175|RBM10_HUMAN	1.7306	0.340294	3.1209	4.33425	2.7542	0.0194266	0.0450361	-3.49847	0	12025000	74931000	34352000	658470000	206330000	563990000	691070000	383160000	2.19308	3.69842	2.95653	5.02776	4.38077	5.21186	5.68641	5.51914	3.46895	5.19955	1.7306	0.0194266	0.0450361
432	sp|P11177|ODPB_HUMAN	sp|P11177|ODPB_HUMAN	7	sp|P11177|ODPB_HUMAN Pyruvate dehydrogenase E1 component subunit beta, mitochondrial OS=Homo sapiens GN=PDHB PE=1 SV=3	-3.74064	-2.01164	sp|P11177|ODPB_HUMAN	1.729	-0.75296	4.21096	-2.75264	1.56227	0.150737	0.23145	-5.29893	1	60166	195900	3503100	NA	3643300	2919900	1644700	1491000	-5.67883	-5.01092	-0.532166	NA	-1.05807	-2.21328	-2.70417	-2.07103	-3.74064	-2.01164	1.729	0.150737	0.23145
135	sp|O15213|WDR46_HUMAN	sp|O15213|WDR46_HUMAN	14	sp|O15213|WDR46_HUMAN WD repeat-containing protein 46 OS=Homo sapiens GN=WDR46 PE=1 SV=3	0.414914	2.1417	sp|O15213|WDR46_HUMAN	1.72679	0.624998	2.82858	1.27831	3.46776	0.00559197	0.0162126	-2.28257	0	2344800	7739100	12841000	28550000	31560000	104370000	43210000	30292000	-0.236101	0.373453	1.45284	0.0694621	1.85094	2.8319	1.83584	2.04814	0.414914	2.1417	1.72679	0.00559197	0.0162126
1105	sp|Q12962|TAF10_HUMAN	sp|Q12962|TAF10_HUMAN	2	sp|Q12962|TAF10_HUMAN Transcription initiation factor TFIID subunit 10 OS=Homo sapiens GN=TAF10 PE=1 SV=1	-2.40704	-0.682512	sp|Q12962|TAF10_HUMAN	1.72452	0.0400262	3.40902	-1.25735	2.33485	0.0458385	0.0889629	-4.08138	2	NA	2231100	NA	3245600	7522200	10901000	3480800	4272600	NA	-1.44816	NA	-3.36592	-0.0812547	-0.354972	-1.66282	-0.631003	-2.40704	-0.682512	1.72452	0.0458385	0.0889629
1075	sp|Q09028|RBBP4_HUMAN	sp|Q09028|RBBP4_HUMAN	14	sp|Q09028|RBBP4_HUMAN Histone-binding protein RBBP4 OS=Homo sapiens GN=RBBP4 PE=1 SV=3	2.68631	4.40861	sp|Q09028|RBBP4_HUMAN	1.72229	0.824229	2.62035	3.54746	4.24335	0.00151677	0.00576423	-0.990387	0	13865000	46704000	22360000	186440000	238220000	311640000	291270000	145920000	2.40464	3.00607	2.30038	3.03417	4.57442	4.37506	4.48632	4.19863	2.68631	4.40861	1.72229	0.00151677	0.00576423
1213	sp|Q14683|SMC1A_HUMAN	sp|Q14683|SMC1A_HUMAN	21	sp|Q14683|SMC1A_HUMAN Structural maintenance of chromosomes protein 1A OS=Homo sapiens GN=SMC1A PE=1 SV=2	-1.02576	0.691036	sp|Q14683|SMC1A_HUMAN	1.7168	0.0515441	3.38205	-0.167362	2.28112	0.0444184	0.0867059	-4.28538	0	413320	3952600	6051700	14690000	42750000	24098000	11683000	5527000	-2.81528	-0.610604	0.303239	-0.9804	2.25984	0.764091	0.0190973	-0.278889	-1.02576	0.691036	1.7168	0.0444184	0.0867059
2224	sp|Q9NNW5|WDR6_HUMAN	sp|Q9NNW5|WDR6_HUMAN	14	sp|Q9NNW5|WDR6_HUMAN WD repeat-containing protein 6 OS=Homo sapiens GN=WDR6 PE=1 SV=1	-0.629645	1.08497	sp|Q9NNW5|WDR6_HUMAN	1.71461	0.412819	3.0164	0.22766	2.91429	0.0146658	0.0356495	-3.22648	0	899660	6392700	3435500	21337000	19350000	38129000	48149000	5647100	-1.65953	0.0935329	-0.561942	-0.390642	1.1918	1.41138	1.98617	-0.249484	-0.629645	1.08497	1.71461	0.0146658	0.0356495
1929	sp|Q96MU7|YTDC1_HUMAN	sp|Q96MU7|YTDC1_HUMAN	6	sp|Q96MU7|YTDC1_HUMAN YTH domain-containing protein 1 OS=Homo sapiens GN=YTHDC1 PE=1 SV=3	-0.652674	1.05296	sp|Q96MU7|YTDC1_HUMAN	1.70563	0.513342	2.89792	0.200142	3.16528	0.00945087	0.0248245	-2.7981	0	742650	5652800	4164400	22431000	11414000	42683000	18730000	20084000	-1.94452	-0.0866167	-0.267919	-0.311643	0.480581	1.57054	0.674699	1.48601	-0.652674	1.05296	1.70563	0.00945087	0.0248245
622	sp|P34897|GLYM_HUMAN	sp|P34897|GLYM_HUMAN	5	sp|P34897|GLYM_HUMAN Serine hydroxymethyltransferase, mitochondrial OS=Homo sapiens GN=SHMT2 PE=1 SV=3	-2.41627	-0.71242	sp|P34897|GLYM_HUMAN	1.70385	-0.136331	3.54403	-1.05319	2.15779	0.0650384	0.117178	-4.1745	3	NA	NA	1020900	NA	6564800	11613000	4657900	3119900	NA	NA	-2.41627	NA	-0.264683	-0.265717	-1.2582	-1.06108	-2.41627	-0.71242	1.70385	0.0650384	0.117178
2511	sp|Q9Y2R5|RT17_HUMAN	sp|Q9Y2R5|RT17_HUMAN	3	sp|Q9Y2R5|RT17_HUMAN 28S ribosomal protein S17, mitochondrial OS=Homo sapiens GN=MRPS17 PE=1 SV=1	-4.22808	-2.53386	sp|Q9Y2R5|RT17_HUMAN	1.69423	0.165957	3.2225	-3.66334	2.52832	0.0336044	0.0698119	-3.78642	2	117920	210870	657650	1864100	1553000	1845200	NA	NA	-4.67895	-4.90307	-3.08828	-4.24203	-2.20699	-2.86073	NA	NA	-4.22808	-2.53386	1.69423	0.0336044	0.0698119
2509	sp|Q9Y2Q9|RT28_HUMAN	sp|Q9Y2Q9|RT28_HUMAN	3	sp|Q9Y2Q9|RT28_HUMAN 28S ribosomal protein S28, mitochondrial OS=Homo sapiens GN=MRPS28 PE=1 SV=1	-2.97853	-1.28502	sp|Q9Y2Q9|RT28_HUMAN	1.69351	-0.177244	3.56427	-1.62372	2.10964	0.0699834	0.124181	-4.24148	3	NA	NA	706620	NA	4972600	5700400	2713100	2772300	NA	NA	-2.97853	NA	-0.638959	-1.26955	-2.00892	-1.22266	-2.97853	-1.28502	1.69351	0.0699834	0.124181
626	sp|P35240|MERL_HUMAN	sp|P35240|MERL_HUMAN	4	sp|P35240|MERL_HUMAN Merlin OS=Homo sapiens GN=NF2 PE=1 SV=1	-4.1606	-2.469	sp|P35240|MERL_HUMAN	1.6916	-1.09288	4.47607	-3.7377	1.45703	0.191351	0.281014	-5.07312	4	NA	233840	174040	5235600	NA	2435800	NA	NA	NA	-4.75164	-5.11974	-2.61041	NA	-2.469	NA	NA	-4.1606	-2.469	1.6916	0.191351	0.281014
618	sp|P33981|TTK_HUMAN	sp|P33981|TTK_HUMAN	13	sp|P33981|TTK_HUMAN Dual specificity protein kinase TTK OS=Homo sapiens GN=TTK PE=1 SV=2	-1.43519	0.249017	sp|P33981|TTK_HUMAN	1.68421	0.53579	2.83263	-0.593088	3.24492	0.00822614	0.0221365	-2.66212	0	2049300	1587500	1360600	11403000	15717000	9189700	15551000	8219700	-0.436259	-1.9466	-1.97733	-1.38059	0.911613	-0.595877	0.416341	0.263993	-1.43519	0.249017	1.68421	0.00822614	0.0221365
1897	sp|Q96GQ7|DDX27_HUMAN	sp|Q96GQ7|DDX27_HUMAN	20	sp|Q96GQ7|DDX27_HUMAN Probable ATP-dependent RNA helicase DDX27 OS=Homo sapiens GN=DDX27 PE=1 SV=2	1.35286	3.03688	sp|Q96GQ7|DDX27_HUMAN	1.68401	-0.363167	3.7312	2.19487	1.82011	0.0972099	0.161106	-5.00279	0	2086400	11657000	99832000	32228000	81021000	153160000	89244000	52871000	-0.409598	0.973369	4.58676	0.260919	3.12128	3.37295	2.84329	2.80999	1.35286	3.03688	1.68401	0.0972099	0.161106
2441	sp|Q9ULI0|ATD2B_HUMAN	sp|Q9ULI0|ATD2B_HUMAN	6	sp|Q9ULI0|ATD2B_HUMAN ATPase family AAA domain-containing protein 2B OS=Homo sapiens GN=ATAD2B PE=1 SV=3	NA	-3.61405	sp|Q9ULI0|ATD2B_HUMAN	NA	NA	NA	-3.61405	NA	NA	NA	NA	4	NA	NA	NA	NA	286340	601600	364310	3969900	NA	NA	NA	NA	-4.4851	-4.44176	-4.79783	-0.731514	-5.2973	-3.61405	1.68325	0	0
285	sp|O94776|MTA2_HUMAN	sp|O94776|MTA2_HUMAN	25	sp|O94776|MTA2_HUMAN Metastasis-associated protein MTA2 OS=Homo sapiens GN=MTA2 PE=1 SV=1	2.01293	3.69531	sp|O94776|MTA2_HUMAN	1.68238	0.775805	2.58895	2.85412	4.1061	0.00190085	0.00686983	-1.21451	0	8714700	22460000	21344000	108160000	172560000	208750000	152870000	72434000	1.71464	1.93387	2.22932	2.17389	4.13995	3.80978	3.59087	3.24061	2.01293	3.69531	1.68238	0.00190085	0.00686983
854	sp|P55771|PAX9_HUMAN;sp|P15863|PAX1_HUMAN	sp|P55771|PAX9_HUMAN	3	sp|P55771|PAX9_HUMAN Paired box protein Pax-9 OS=Homo sapiens GN=PAX9 PE=1 SV=3;sp|P15863|PAX1_HUMAN Paired box protein Pax-1 OS=Homo sapiens GN=PAX1 PE=1 SV=4	NA	-3.6221	sp|P55771|PAX9_HUMAN	NA	NA	NA	-3.6221	NA	NA	NA	NA	4	NA	NA	NA	NA	190410	730670	6265900	263880	NA	NA	NA	NA	-5.03483	-4.16757	-0.846274	-4.43974	-5.2973	-3.6221	1.67519	0	0
481	sp|P17096|HMGA1_HUMAN	sp|P17096|HMGA1_HUMAN	5	sp|P17096|HMGA1_HUMAN High mobility group protein HMG-I/HMG-Y OS=Homo sapiens GN=HMGA1 PE=1 SV=3	2.01692	3.69197	sp|P17096|HMGA1_HUMAN	1.67506	0.711754	2.63836	2.85445	3.84748	0.0029271	0.00982638	-1.64271	0	9304400	42010000	17163000	70991000	120500000	216690000	152030000	98865000	1.81193	2.85094	1.89617	1.50863	3.65611	3.86244	3.58322	3.66612	2.01692	3.69197	1.67506	0.0029271	0.00982638
1308	sp|Q15906|VPS72_HUMAN	sp|Q15906|VPS72_HUMAN	8	sp|Q15906|VPS72_HUMAN Vacuolar protein sorting-associated protein 72 homolog OS=Homo sapiens GN=VPS72 PE=1 SV=1	-0.312827	1.35815	sp|Q15906|VPS72_HUMAN	1.67098	0.666488	2.67547	0.522663	3.68073	0.00388241	0.0122166	-1.92231	0	1668600	5511600	4799500	22102000	11756000	41466000	47751000	18969000	-0.741637	-0.123664	-0.0510193	-0.334988	0.52036	1.52973	1.97464	1.40788	-0.312827	1.35815	1.67098	0.00388241	0.0122166
1355	sp|Q3T8J9|GON4L_HUMAN;sp|Q9H869|YYAP1_HUMAN	sp|Q3T8J9|GON4L_HUMAN	2	sp|Q3T8J9|GON4L_HUMAN GON-4-like protein OS=Homo sapiens GN=GON4L PE=1 SV=1;sp|Q9H869|YYAP1_HUMAN YY1-associated protein 1 OS=Homo sapiens GN=YY1AP1 PE=1 SV=2	-2.62269	-0.956691	sp|Q3T8J9|GON4L_HUMAN	1.666	0.167557	3.16445	-1.51203	2.53568	0.0332098	0.0692359	-3.77513	2	NA	537410	NA	9242700	3494400	6008100	5456100	4776200	NA	-3.53295	NA	-1.71244	-1.11429	-1.19538	-1.0385	-0.478594	-2.62269	-0.956691	1.666	0.0332098	0.0692359
2019	sp|Q9BQE3|TBA1C_HUMAN	sp|Q9BQE3|TBA1C_HUMAN	23	sp|Q9BQE3|TBA1C_HUMAN Tubulin alpha-1C chain OS=Homo sapiens GN=TUBA1C PE=1 SV=1	-1.82116	-0.165537	sp|Q9BQE3|TBA1C_HUMAN	1.65562	-1.00433	4.31557	-0.717411	1.41954	0.191176	0.280932	-5.36874	2	NA	318200	NA	41441000	8951500	13220000	10137000	4518900	NA	-4.30049	NA	0.658174	0.15314	-0.0828836	-0.178063	-0.55434	-1.82116	-0.165537	1.65562	0.191176	0.280932
1590	sp|Q86XL3|ANKL2_HUMAN	sp|Q86XL3|ANKL2_HUMAN	3	sp|Q86XL3|ANKL2_HUMAN Ankyrin repeat and LEM domain-containing protein 2 OS=Homo sapiens GN=ANKLE2 PE=1 SV=4	2.57802	4.22302	sp|Q86XL3|ANKL2_HUMAN	1.64501	0.672965	2.61705	3.40052	3.74448	0.00348375	0.0112318	-1.81512	0	18876000	38550000	35620000	80743000	178860000	241310000	249580000	171280000	2.86309	2.72506	3.01192	1.712	4.18827	4.01425	4.27176	4.41781	2.57802	4.22302	1.64501	0.00348375	0.0112318
2337	sp|Q9NZC7|WWOX_HUMAN	sp|Q9NZC7|WWOX_HUMAN	16	sp|Q9NZC7|WWOX_HUMAN WW domain-containing oxidoreductase OS=Homo sapiens GN=WWOX PE=1 SV=1	0.507696	2.13992	sp|Q9NZC7|WWOX_HUMAN	1.63222	-0.356862	3.62131	1.4404	1.84027	0.0969778	0.160835	-4.91069	1	NA	3126000	4118600	156950000	22534000	123910000	33436000	45646000	NA	-0.954219	-0.284818	2.76213	1.39705	3.07399	1.47964	2.609	0.507696	2.13992	1.63222	0.0969778	0.160835
1227	sp|Q14814|MEF2D_HUMAN	sp|Q14814|MEF2D_HUMAN	13	sp|Q14814|MEF2D_HUMAN Myocyte-specific enhancer factor 2D OS=Homo sapiens GN=MEF2D PE=1 SV=1	1.45153	3.07551	sp|Q14814|MEF2D_HUMAN	1.62398	0.597008	2.65095	2.26352	3.49889	0.00530008	0.0155522	-2.22972	0	6843500	10881000	15513000	87361000	41693000	135670000	126560000	90521000	1.35547	0.872477	1.74171	1.83647	2.22611	3.2019	3.32853	3.54551	1.45153	3.07551	1.62398	0.00530008	0.0155522
1121	sp|Q13151|ROA0_HUMAN	sp|Q13151|ROA0_HUMAN	14	sp|Q13151|ROA0_HUMAN Heterogeneous nuclear ribonucleoprotein A0 OS=Homo sapiens GN=HNRNPA0 PE=1 SV=1	3.13046	4.74807	sp|Q13151|ROA0_HUMAN	1.61762	0.653561	2.58167	3.93927	3.71263	0.0036773	0.0117118	-1.86862	0	14835000	43265000	61460000	217440000	252160000	472190000	314800000	224150000	2.50512	2.89405	3.84547	3.27718	4.65104	4.96124	4.59423	4.78578	3.13046	4.74807	1.61762	0.0036773	0.0117118
65	sp|O00217|NDUS8_HUMAN	sp|O00217|NDUS8_HUMAN	3	sp|O00217|NDUS8_HUMAN NADH dehydrogenase [ubiquinone] iron-sulfur protein 8, mitochondrial OS=Homo sapiens GN=NDUFS8 PE=1 SV=1	-5.11054	-3.49851	sp|O00217|NDUS8_HUMAN	1.61204	-1.183	4.40708	-3.90152	1.38326	0.211927	0.305061	-5.15921	4	NA	NA	175090	NA	210390	1241300	NA	1381700	NA	NA	-5.11054	NA	-4.90039	-3.41997	NA	-2.17517	-5.11054	-3.49851	1.61204	0.211927	0.305061
2466	sp|Q9UNX4|WDR3_HUMAN	sp|Q9UNX4|WDR3_HUMAN	27	sp|Q9UNX4|WDR3_HUMAN WD repeat-containing protein 3 OS=Homo sapiens GN=WDR3 PE=1 SV=1	0.178896	1.78664	sp|Q9UNX4|WDR3_HUMAN	1.60775	0.303513	2.91198	0.982769	2.72754	0.0203578	0.0466669	-3.54358	0	1647300	5076300	13656000	30495000	40809000	85322000	25630000	17420000	-0.760727	-0.244157	1.54688	0.17359	2.19724	2.54763	1.11034	1.29136	0.178896	1.78664	1.60775	0.0203578	0.0466669
2599	zz|FGCZCont0092_Q5I0H3|SUMO1_RAT;sp|P63165|SUMO1_HUMAN	zz|FGCZCont0092_Q5I0H3|SUMO1_RAT	4	zz|FGCZCont0092_Q5I0H3|SUMO1_RAT blastpHomologue_6.0e-71;sp|P63165|SUMO1_HUMAN Small ubiquitin-related modifier 1 OS=Homo sapiens GN=SUMO1 PE=1 SV=1	-0.413604	1.18711	zz|FGCZCont0092_Q5I0H3|SUMO1_RAT	1.60072	-0.142025	3.34346	0.272418	2.05986	0.0677287	0.120816	-4.58366	1	2495800	5522000	3037700	18220000	80092000	27822000	7975300	NA	-0.143366	-0.120903	-0.749994	-0.640153	3.10574	0.966804	-0.511207	NA	-0.413604	1.18711	1.60072	0.0677287	0.120816
2396	sp|Q9UHD2|TBK1_HUMAN	sp|Q9UHD2|TBK1_HUMAN	4	sp|Q9UHD2|TBK1_HUMAN Serine/threonine-protein kinase TBK1 OS=Homo sapiens GN=TBK1 PE=1 SV=1	-4.08481	-2.4923	sp|Q9UHD2|TBK1_HUMAN	1.59251	-0.292303	3.47732	-3.40231	1.89483	0.0887673	0.149316	-4.83089	1	148470	90564	1032300	3053300	828910	1967500	3503500	NA	-4.33663	-6.1409	-2.3993	-3.46241	-3.05292	-2.7702	-1.65379	NA	-4.08481	-2.4923	1.59251	0.0887673	0.149316
393	sp|P07305|H10_HUMAN	sp|P07305|H10_HUMAN	5	sp|P07305|H10_HUMAN Histone H1.0 OS=Homo sapiens GN=H1F0 PE=1 SV=3	1.29466	2.88632	sp|P07305|H10_HUMAN	1.59166	0.418417	2.76491	2.09049	3.00173	0.0125808	0.0314136	-3.07739	0	2702000	18874000	21293000	62181000	76266000	111070000	107220000	41771000	-0.0254086	1.67911	2.22566	1.29928	3.03979	2.91967	3.09819	2.48765	1.29466	2.88632	1.59166	0.0125808	0.0314136
1329	sp|Q16777|H2A2C_HUMAN;sp|Q6FI13|H2A2A_HUMAN	sp|Q16777|H2A2C_HUMAN	8	sp|Q16777|H2A2C_HUMAN Histone H2A type 2-C OS=Homo sapiens GN=HIST2H2AC PE=1 SV=4;sp|Q6FI13|H2A2A_HUMAN Histone H2A type 2-A OS=Homo sapiens GN=HIST2H2AA3 PE=1 SV=3	8.57836	10.1638	sp|Q16777|H2A2C_HUMAN	1.58543	0.556634	2.61422	9.37107	3.40978	0.00618035	0.0176581	-2.38112	0	1135900000	1921300000	2113800000	3485400000	13695000000	22088000000	14370000000	12947000000	8.95136	8.44974	9.25171	7.66062	10.0335	10.3859	9.90158	10.3342	8.57836	10.1638	1.58543	0.00618035	0.0176581
1678	sp|Q8NBM4|UBAC2_HUMAN	sp|Q8NBM4|UBAC2_HUMAN	5	sp|Q8NBM4|UBAC2_HUMAN Ubiquitin-associated domain-containing protein 2 OS=Homo sapiens GN=UBAC2 PE=1 SV=1	-4.81464	-3.23091	sp|Q8NBM4|UBAC2_HUMAN	1.58373	-0.172387	3.33984	-3.54766	2.10168	0.0708371	0.12508	-4.25254	3	NA	NA	212500	NA	562540	2138100	1066300	568710	NA	NA	-4.81464	NA	-3.57523	-2.65289	-3.30611	-3.38941	-4.81464	-3.23091	1.58373	0.0708371	0.12508
2317	sp|Q9NXV6|CARF_HUMAN	sp|Q9NXV6|CARF_HUMAN	7	sp|Q9NXV6|CARF_HUMAN CDKN2A-interacting protein OS=Homo sapiens GN=CDKN2AIP PE=1 SV=3	-2.66225	-1.07994	sp|Q9NXV6|CARF_HUMAN	1.58231	0.049309	3.11531	-1.8711	2.2838	0.0442125	0.0863754	-4.28103	0	501030	3074400	252930	5294900	3704300	8779800	6373600	1816100	-2.52932	-0.978596	-4.54849	-2.59262	-1.0357	-0.660246	-0.822602	-1.80124	-2.66225	-1.07994	1.58231	0.0442125	0.0863754
1503	sp|Q6ZRI6|CO039_HUMAN	sp|Q6ZRI6|CO039_HUMAN	16	sp|Q6ZRI6|CO039_HUMAN Uncharacterized protein C15orf39 OS=Homo sapiens GN=C15orf39 PE=1 SV=3	-0.269975	1.30966	sp|Q6ZRI6|CO039_HUMAN	1.57964	-0.402286	3.56156	0.993734	1.85741	0.102561	0.167853	-4.58638	3	NA	NA	4158800	NA	17587000	65324000	33112000	10047000	NA	NA	-0.269975	NA	1.06308	2.17087	1.46611	0.538574	-0.269975	1.30966	1.57964	0.102561	0.167853
19	REV__sp|P11055|MYH3_HUMAN	REV__sp|P11055|MYH3_HUMAN	2	sp|P11055|MYH3_HUMAN Myosin-3 OS=Homo sapiens GN=MYH3 PE=1 SV=3	-3.21222	-1.63799	REV__sp|P11055|MYH3_HUMAN	1.57423	-0.307792	3.45624	-2.26768	1.94931	0.0892706	0.150056	-4.62306	3	NA	1199800	NA	2081500	NA	5942100	1730400	3101000	NA	-2.35668	NA	-4.06775	NA	-1.21097	-2.63361	-1.06939	-3.21222	-1.63799	1.57423	0.0892706	0.150056
252	sp|O75525|KHDR3_HUMAN	sp|O75525|KHDR3_HUMAN	3	sp|O75525|KHDR3_HUMAN KH domain-containing, RNA-binding, signal transduction-associated protein 3 OS=Homo sapiens GN=KHDRBS3 PE=1 SV=1	-3.61074	-2.04182	sp|O75525|KHDR3_HUMAN	1.56891	0.321874	2.81595	-2.56479	2.86932	0.0194878	0.0451337	-3.2621	2	NA	456780	518880	NA	2589300	3291200	2161700	1279600	NA	-3.77102	-3.45045	NA	-1.5182	-2.04442	-2.3245	-2.28018	-3.61074	-2.04182	1.56891	0.0194878	0.0451337
803	sp|P52272|HNRPM_HUMAN	sp|P52272|HNRPM_HUMAN	35	sp|P52272|HNRPM_HUMAN Heterogeneous nuclear ribonucleoprotein M OS=Homo sapiens GN=HNRNPM PE=1 SV=3	3.07443	4.63213	sp|P52272|HNRPM_HUMAN	1.55771	0.477398	2.63801	3.85328	3.19041	0.00904553	0.023959	-2.75518	0	24979000	63084000	49076000	101300000	419870000	311820000	307410000	151880000	3.27936	3.44637	3.50162	2.07036	5.33805	4.37587	4.56123	4.25339	3.07443	4.63213	1.55771	0.00904553	0.023959
858	sp|P56182|RRP1_HUMAN	sp|P56182|RRP1_HUMAN	9	sp|P56182|RRP1_HUMAN Ribosomal RNA processing protein 1 homolog A OS=Homo sapiens GN=RRP1 PE=1 SV=1	-0.455973	1.0974	sp|P56182|RRP1_HUMAN	1.55338	-0.0556757	3.16243	0.320715	2.13607	0.0570354	0.105421	-4.51807	0	528470	7397300	10942000	15561000	19003000	39890000	30348000	9092800	-2.45009	0.307298	1.20829	-0.889393	1.16742	1.47507	1.34504	0.402075	-0.455973	1.0974	1.55338	0.0570354	0.105421
1558	sp|Q7Z7F0|K0907_HUMAN	sp|Q7Z7F0|K0907_HUMAN	10	sp|Q7Z7F0|K0907_HUMAN UPF0469 protein KIAA0907 OS=Homo sapiens GN=KIAA0907 PE=1 SV=1	-1.28301	0.267994	sp|Q7Z7F0|K0907_HUMAN	1.551	0.18694	2.91507	-0.507507	2.51586	0.0295093	0.0625713	-3.89911	0	363140	5472900	2189900	17100000	6919200	21038000	18164000	7087200	-3.0076	-0.133984	-1.25006	-0.740387	-0.19384	0.572521	0.632077	0.0612189	-1.28301	0.267994	1.551	0.0295093	0.0625713
955	sp|P63151|2ABA_HUMAN	sp|P63151|2ABA_HUMAN	14	sp|P63151|2ABA_HUMAN Serine/threonine-protein phosphatase 2A 55 kDa regulatory subunit B alpha isoform OS=Homo sapiens GN=PPP2R2A PE=1 SV=1	0.658871	2.20535	sp|P63151|2ABA_HUMAN	1.54648	0.144051	2.94892	1.43211	2.4399	0.0336994	0.0699477	-4.0252	0	3594700	23129000	4498300	35415000	29897000	38560000	162070000	28074000	0.398777	1.97686	-0.15006	0.409908	1.778	1.42724	3.67205	1.94413	0.658871	2.20535	1.54648	0.0336994	0.0699477
1299	sp|Q15717|ELAV1_HUMAN	sp|Q15717|ELAV1_HUMAN	16	sp|Q15717|ELAV1_HUMAN ELAV-like protein 1 OS=Homo sapiens GN=ELAVL1 PE=1 SV=2	2.50617	4.05102	sp|Q15717|ELAV1_HUMAN	1.54485	0.612343	2.47736	3.2786	3.66558	0.00398389	0.0124365	-1.94782	0	15937000	33166000	35333000	91453000	125650000	299030000	224330000	131010000	2.61159	2.50474	2.99956	1.90879	3.7125	4.31679	4.1236	4.0512	2.50617	4.05102	1.54485	0.00398389	0.0124365
802	sp|P51991|ROA3_HUMAN	sp|P51991|ROA3_HUMAN	28	sp|P51991|ROA3_HUMAN Heterogeneous nuclear ribonucleoprotein A3 OS=Homo sapiens GN=HNRNPA3 PE=1 SV=2	5.36218	6.89998	sp|P51991|ROA3_HUMAN	1.5378	0.580739	2.49486	6.13108	3.55524	0.00481111	0.0145009	-2.13422	0	94514000	150500000	225810000	969020000	1286900000	2236300000	1232400000	1223900000	5.2567	4.7198	5.83401	5.6382	6.84719	7.15514	6.48992	7.10767	5.36218	6.89998	1.5378	0.00481111	0.0145009
1895	sp|Q96GD4|AURKB_HUMAN	sp|Q96GD4|AURKB_HUMAN	11	sp|Q96GD4|AURKB_HUMAN Aurora kinase B OS=Homo sapiens GN=AURKB PE=1 SV=3	-1.45973	0.0760872	sp|Q96GD4|AURKB_HUMAN	1.53582	0.265301	2.80634	-0.691823	2.67466	0.0223387	0.049947	-3.63288	0	502230	2113400	2053400	20717000	6732600	7892200	14745000	14111000	-2.52576	-1.52753	-1.34841	-0.437232	-0.230676	-0.810595	0.342416	1.0032	-1.45973	0.0760872	1.53582	0.0223387	0.049947
2459	sp|Q9UMY1|NOL7_HUMAN	sp|Q9UMY1|NOL7_HUMAN	6	sp|Q9UMY1|NOL7_HUMAN Nucleolar protein 7 OS=Homo sapiens GN=NOL7 PE=1 SV=2	-1.4882	0.0434033	sp|Q9UMY1|NOL7_HUMAN	1.53161	-0.180326	3.24354	-0.613	2.0064	0.0739637	0.129204	-4.66465	1	NA	835300	4522900	11011000	17946000	16668000	4676500	7248000	NA	-2.88703	-0.141725	-1.43586	1.09031	0.244057	-1.25266	0.0919068	-1.4882	0.0434033	1.53161	0.0739637	0.129204
762	sp|P49792|RBP2_HUMAN	sp|P49792|RBP2_HUMAN	164	sp|P49792|RBP2_HUMAN E3 SUMO-protein ligase RanBP2 OS=Homo sapiens GN=RANBP2 PE=1 SV=2	5.91051	7.4417	sp|P49792|RBP2_HUMAN	1.53119	0.463935	2.59845	6.6761	3.17446	0.00930078	0.0245799	-2.78243	0	121420000	327370000	209440000	1605700000	4243500000	2756900000	1816500000	1001100000	5.62894	5.85796	5.71901	6.43613	8.45482	7.45038	7.02879	6.83282	5.91051	7.4417	1.53119	0.00930078	0.0245799
111	sp|O14735|CDIPT_HUMAN	sp|O14735|CDIPT_HUMAN	4	sp|O14735|CDIPT_HUMAN CDP-diacylglycerol--inositol 3-phosphatidyltransferase OS=Homo sapiens GN=CDIPT PE=1 SV=1	-2.97046	-1.43971	sp|O14735|CDIPT_HUMAN	1.53074	-0.943297	4.00478	-2.31442	1.38756	0.196809	0.288311	-5.52397	1	581840	1533900	72738	13406000	3136700	4719100	3848600	NA	-2.30713	-1.9969	-6.45289	-1.12491	-1.2598	-1.53605	-1.5233	NA	-2.97046	-1.43971	1.53074	0.196809	0.288311
771	sp|P50454|SERPH_HUMAN	sp|P50454|SERPH_HUMAN	5	sp|P50454|SERPH_HUMAN Serpin H1 OS=Homo sapiens GN=SERPINH1 PE=1 SV=2	-3.12146	-1.59232	sp|P50454|SERPH_HUMAN	1.52915	0.0937902	2.9645	-2.35689	2.35721	0.0389225	0.0782879	-4.16133	0	463170	800120	1029900	1596500	5371700	5145500	4270000	733510	-2.64607	-2.95005	-2.40286	-4.48687	-0.534939	-1.41402	-1.37897	-3.04133	-3.12146	-1.59232	1.52915	0.0389225	0.0782879
565	sp|P27694|RFA1_HUMAN	sp|P27694|RFA1_HUMAN	32	sp|P27694|RFA1_HUMAN Replication protein A 70 kDa DNA-binding subunit OS=Homo sapiens GN=RPA1 PE=1 SV=2	2.54132	4.06774	sp|P27694|RFA1_HUMAN	1.52642	0.326947	2.7259	3.30453	2.81574	0.0174363	0.0411498	-3.39411	0	14055000	30593000	24023000	176090000	54602000	403550000	331250000	154500000	2.42487	2.38647	2.41	2.94393	2.58955	4.73965	4.66498	4.27678	2.54132	4.06774	1.52642	0.0174363	0.0411498
1667	sp|Q8N720|ZN655_HUMAN	sp|Q8N720|ZN655_HUMAN	3	sp|Q8N720|ZN655_HUMAN Zinc finger protein 655 OS=Homo sapiens GN=ZNF655 PE=1 SV=3	-2.93773	-1.41355	sp|Q8N720|ZN655_HUMAN	1.52417	0.236478	2.81187	-2.06677	2.65447	0.0250454	0.0546859	-3.64396	1	184520	1546300	NA	4601300	1901400	6013500	4825200	2588200	-4.01362	-1.98511	NA	-2.81445	-1.93427	-1.19412	-1.20918	-1.31665	-2.93773	-1.41355	1.52417	0.0250454	0.0546859
1210	sp|Q14671|PUM1_HUMAN	sp|Q14671|PUM1_HUMAN	9	sp|Q14671|PUM1_HUMAN Pumilio homolog 1 OS=Homo sapiens GN=PUM1 PE=1 SV=3	-1.40341	0.118831	sp|Q14671|PUM1_HUMAN	1.52224	0.427379	2.61709	-0.642287	3.07633	0.0110401	0.0281064	-2.95002	0	851780	2382200	1164800	22513000	9221500	19711000	11258000	6002100	-1.74079	-1.35218	-2.21477	-0.305877	0.19318	0.48061	-0.0323737	-0.166091	-1.40341	0.118831	1.52224	0.0110401	0.0281064
1873	sp|Q96EB6|SIR1_HUMAN	sp|Q96EB6|SIR1_HUMAN	6	sp|Q96EB6|SIR1_HUMAN NAD-dependent protein deacetylase sirtuin-1 OS=Homo sapiens GN=SIRT1 PE=1 SV=2	-1.72959	-0.209634	sp|Q96EB6|SIR1_HUMAN	1.51995	0.177745	2.86216	-0.96961	2.50564	0.0300418	0.0635862	-3.91613	0	2502400	1005600	914520	10056000	5972100	9890400	16964000	4732100	-0.139442	-2.61528	-2.58443	-1.5792	-0.392178	-0.492218	0.537141	-0.491282	-1.72959	-0.209634	1.51995	0.0300418	0.0635862
1004	sp|P84243|H33_HUMAN	sp|P84243|H33_HUMAN	12	sp|P84243|H33_HUMAN Histone H3.3 OS=Homo sapiens GN=H3F3A PE=1 SV=2	-5.23593	-3.71752	sp|P84243|H33_HUMAN	1.51842	-0.112759	3.14959	-4.47673	2.23257	0.0633555	0.114926	-4.18335	4	NA	180820	150320	NA	575720	888920	NA	NA	NA	-5.12823	-5.34363	NA	-3.54403	-3.89101	NA	NA	-5.23593	-3.71752	1.51842	0.0633555	0.114926
203	sp|O60563|CCNT1_HUMAN	sp|O60563|CCNT1_HUMAN	21	sp|O60563|CCNT1_HUMAN Cyclin-T1 OS=Homo sapiens GN=CCNT1 PE=1 SV=1	3.48958	4.99996	sp|O60563|CCNT1_HUMAN	1.51039	0.570141	2.45063	4.24477	3.55431	0.00481875	0.0145054	-2.13578	0	24642000	54692000	43205000	378970000	234090000	539260000	482210000	284900000	3.25918	3.23731	3.30692	4.1549	4.55085	5.14861	5.18656	5.11382	3.48958	4.99996	1.51039	0.00481875	0.0145054
1898	sp|Q96GX5|GWL_HUMAN	sp|Q96GX5|GWL_HUMAN	6	sp|Q96GX5|GWL_HUMAN Serine/threonine-protein kinase greatwall OS=Homo sapiens GN=MASTL PE=1 SV=1	-4.57268	-3.06922	sp|Q96GX5|GWL_HUMAN	1.50346	-0.34839	3.35531	-3.82095	1.79637	0.101102	0.166156	-5.03773	0	47351	238020	192130	5399700	189120	1898000	2211400	1439600	-6.03474	-4.72569	-4.96863	-2.56165	-5.04399	-2.82093	-2.29292	-2.11902	-4.57268	-3.06922	1.50346	0.101102	0.166156
974	sp|P68431|H31_HUMAN;sp|Q16695|H31T_HUMAN;sp|Q6NXT2|H3C_HUMAN	sp|P68431|H31_HUMAN	12	sp|P68431|H31_HUMAN Histone H3.1 OS=Homo sapiens GN=HIST1H3A PE=1 SV=2;sp|Q16695|H31T_HUMAN Histone H3.1t OS=Homo sapiens GN=HIST3H3 PE=1 SV=3;sp|Q6NXT2|H3C_HUMAN Histone H3.3C OS=Homo sapiens GN=H3F3C PE=1 SV=3	7.98339	9.4851	sp|P68431|H31_HUMAN	1.50171	0.550015	2.45341	8.73425	3.49138	0.00536907	0.0157014	-2.24247	0	625400000	1447300000	1336200000	2745000000	7927700000	13406000000	9349000000	7894500000	8.06458	8.03483	8.55083	7.28333	9.2969	9.68151	9.30448	9.6575	7.98339	9.4851	1.50171	0.00536907	0.0157014
1332	sp|Q16878|CDO1_HUMAN	sp|Q16878|CDO1_HUMAN	2	sp|Q16878|CDO1_HUMAN Cysteine dioxygenase type 1 OS=Homo sapiens GN=CDO1 PE=1 SV=2	-2.2323	-0.732433	sp|Q16878|CDO1_HUMAN	1.49986	-1.49013	4.48986	-1.48236	1.20309	0.27065	0.368997	-5.48594	4	1985800	NA	NA	2198200	8061100	4921400	NA	NA	-0.48303	NA	NA	-3.98156	0.0119729	-1.47684	NA	NA	-2.2323	-0.732433	1.49986	0.27065	0.368997
37	REV__sp|Q96QC0|PP1RA_HUMAN	REV__sp|Q96QC0|PP1RA_HUMAN	2	sp|Q96QC0|PP1RA_HUMAN Serine/threonine-protein phosphatase 1 regulatory subunit 10 OS=Homo sapiens GN=PPP1R10 PE=1 SV=1	-0.3134	1.18519	REV__sp|Q96QC0|PP1RA_HUMAN	1.49859	-0.102703	3.09988	0.585754	2.18097	0.0627823	0.11415	-4.29488	3	2365300	NA	3810500	NA	NA	45898000	37344000	8132500	-0.223167	NA	-0.403633	NA	NA	1.67299	1.63318	0.249404	-0.3134	1.18519	1.49859	0.0627823	0.11415
331	sp|O95757|HS74L_HUMAN	sp|O95757|HS74L_HUMAN	11	sp|O95757|HS74L_HUMAN Heat shock 70 kDa protein 4L OS=Homo sapiens GN=HSPA4L PE=1 SV=3	-3.92019	-2.42364	sp|O95757|HS74L_HUMAN	1.49655	-0.634195	3.6273	-3.32157	1.63681	0.142582	0.221961	-5.04653	3	69774	955280	NA	2778500	2018900	1679100	NA	NA	-5.45868	-2.69047	NA	-3.61142	-1.85348	-2.9938	NA	NA	-3.92019	-2.42364	1.49655	0.142582	0.221961
1284	sp|Q15532|SSXT_HUMAN	sp|Q15532|SSXT_HUMAN	2	sp|Q15532|SSXT_HUMAN Protein SSXT OS=Homo sapiens GN=SS18 PE=1 SV=3	-1.88989	-0.394407	sp|Q15532|SSXT_HUMAN	1.49548	-0.180863	3.17183	-0.693504	2.07901	0.0733219	0.128368	-4.28395	3	NA	NA	NA	8260800	6193200	12897000	6909800	5035600	NA	NA	NA	-1.88989	-0.343196	-0.117779	-0.710403	-0.406252	-1.88989	-0.394407	1.49548	0.0733219	0.128368
2049	sp|Q9BUJ2|HNRL1_HUMAN	sp|Q9BUJ2|HNRL1_HUMAN	25	sp|Q9BUJ2|HNRL1_HUMAN Heterogeneous nuclear ribonucleoprotein U-like protein 1 OS=Homo sapiens GN=HNRNPUL1 PE=1 SV=2	2.40295	3.89745	sp|Q9BUJ2|HNRL1_HUMAN	1.4945	0.234626	2.75437	3.1502	2.62469	0.024386	0.0536356	-3.71699	0	6348700	19320000	45732000	215190000	128620000	270110000	141410000	144990000	1.24396	1.71332	3.39378	3.26075	3.74398	4.1733	3.48264	4.18988	2.40295	3.89745	1.4945	0.024386	0.0536356
930	sp|P62805|H4_HUMAN	sp|P62805|H4_HUMAN	20	sp|P62805|H4_HUMAN Histone H4 OS=Homo sapiens GN=HIST1H4A PE=1 SV=2	8.59017	10.0839	sp|P62805|H4_HUMAN	1.49375	0.464099	2.5234	9.33705	3.20994	0.00874281	0.023367	-2.72183	0	785830000	2053300000	2417700000	4193300000	12417000000	21994000000	11894000000	13739000000	8.40389	8.54706	9.45698	7.95277	9.90148	10.3799	9.63891	10.4154	8.59017	10.0839	1.49375	0.00874281	0.023367
2299	sp|Q9NVX2|NLE1_HUMAN	sp|Q9NVX2|NLE1_HUMAN	2	sp|Q9NVX2|NLE1_HUMAN Notchless protein homolog 1 OS=Homo sapiens GN=NLE1 PE=1 SV=4	-3.95612	-2.46703	sp|Q9NVX2|NLE1_HUMAN	1.48909	-0.853231	3.83142	-3.06266	1.48154	0.178975	0.265983	-5.24475	3	NA	NA	664020	1277800	1935900	5578800	NA	316490	NA	NA	-3.07355	-4.83868	-1.91004	-1.29996	NA	-4.19107	-3.95612	-2.46703	1.48909	0.178975	0.265983
991	sp|P82912|RT11_HUMAN	sp|P82912|RT11_HUMAN	2	sp|P82912|RT11_HUMAN 28S ribosomal protein S11, mitochondrial OS=Homo sapiens GN=MRPS11 PE=1 SV=2	-3.11791	-1.62939	sp|P82912|RT11_HUMAN	1.48852	-0.0775863	3.05463	-2.2248	2.21499	0.0596123	0.109568	-4.24603	3	215680	NA	995960	NA	1874400	4209200	4728600	NA	-3.78176	NA	-2.45407	NA	-1.95354	-1.69736	-1.23727	NA	-3.11791	-1.62939	1.48852	0.0596123	0.109568
1699	sp|Q8NEJ9|NGDN_HUMAN	sp|Q8NEJ9|NGDN_HUMAN	5	sp|Q8NEJ9|NGDN_HUMAN Neuroguidin OS=Homo sapiens GN=NGDN PE=1 SV=1	-2.90752	-1.42996	sp|Q8NEJ9|NGDN_HUMAN	1.47757	-0.355072	3.3102	-2.16874	1.83878	0.100866	0.165884	-4.8621	2	NA	518330	1943200	2620400	2883100	10235000	1943100	NA	NA	-3.58589	-1.4327	-3.70398	-1.37339	-0.443904	-2.47258	NA	-2.90752	-1.42996	1.47757	0.100866	0.165884
1133	sp|Q13243|SRSF5_HUMAN	sp|Q13243|SRSF5_HUMAN	3	sp|Q13243|SRSF5_HUMAN Serine/arginine-rich splicing factor 5 OS=Homo sapiens GN=SRSF5 PE=1 SV=1	-2.99826	-1.52878	sp|Q13243|SRSF5_HUMAN	1.46949	-0.00381313	2.94279	-2.41047	2.32441	0.0504613	0.0957304	-4.0881	3	NA	869620	936500	2765900	NA	5353100	3390500	NA	NA	-2.82806	-2.54813	-3.6186	NA	-1.35822	-1.69933	NA	-2.99826	-1.52878	1.46949	0.0504613	0.0957304
1441	sp|Q659A1|ICE2_HUMAN	sp|Q659A1|ICE2_HUMAN	2	sp|Q659A1|ICE2_HUMAN Little elongation complex subunit 2 OS=Homo sapiens GN=ICE2 PE=1 SV=2	-4.41383	-2.94504	sp|Q659A1|ICE2_HUMAN	1.46879	-0.57907	3.51665	-3.57452	1.60848	0.140262	0.219218	-5.23677	1	336630	NA	50207	3836000	897230	2542800	983060	752380	-3.12024	NA	-7.01938	-3.10186	-2.9462	-2.40835	-3.41901	-3.00659	-4.41383	-2.94504	1.46879	0.140262	0.219218
993	sp|P82930|RT34_HUMAN	sp|P82930|RT34_HUMAN	5	sp|P82930|RT34_HUMAN 28S ribosomal protein S34, mitochondrial OS=Homo sapiens GN=MRPS34 PE=1 SV=2	-2.77561	-1.31073	sp|P82930|RT34_HUMAN	1.46489	-0.36342	3.29319	-1.93853	1.79685	0.104012	0.169874	-4.97344	1	NA	653530	1381600	3776700	6068100	10106000	6277000	499610	NA	-3.24644	-1.95393	-3.12647	-0.370691	-0.461797	-0.843816	-3.5666	-2.77561	-1.31073	1.46489	0.104012	0.169874
2103	sp|Q9GZR2|REXO4_HUMAN	sp|Q9GZR2|REXO4_HUMAN	7	sp|Q9GZR2|REXO4_HUMAN RNA exonuclease 4 OS=Homo sapiens GN=REXO4 PE=1 SV=2	-2.35487	-0.894921	sp|Q9GZR2|REXO4_HUMAN	1.45995	-0.875689	3.79559	-1.6249	1.38306	0.195229	0.286174	-5.60205	0	91580	898040	5377100	9277100	12325000	11001000	1424900	3463400	-5.05458	-2.78096	0.122631	-1.70657	0.584046	-0.34209	-2.90343	-0.918211	-2.35487	-0.894921	1.45995	0.195229	0.286174
853	sp|P55769|NH2L1_HUMAN	sp|P55769|NH2L1_HUMAN	10	sp|P55769|NH2L1_HUMAN NHP2-like protein 1 OS=Homo sapiens GN=SNU13 PE=1 SV=3	2.47763	3.9374	sp|P55769|NH2L1_HUMAN	1.45977	-0.0480915	2.96763	3.20752	2.14206	0.0564524	0.10461	-4.50857	0	12076000	18314000	83322000	83532000	270470000	354110000	96728000	87155000	2.19936	1.635	4.31052	1.76565	4.74549	4.55529	2.95514	3.49368	2.47763	3.9374	1.45977	0.0564524	0.10461
660	sp|P38646|GRP75_HUMAN	sp|P38646|GRP75_HUMAN	40	sp|P38646|GRP75_HUMAN Stress-70 protein, mitochondrial OS=Homo sapiens GN=HSPA9 PE=1 SV=2	4.77426	6.23197	sp|P38646|GRP75_HUMAN	1.45772	0.466262	2.44917	5.50311	3.25319	0.00810866	0.0219454	-2.64801	0	78812000	116970000	179390000	409490000	1109800000	1246900000	829780000	548020000	4.98673	4.35067	5.48235	4.27728	6.6477	6.33107	5.94049	6.00863	4.77426	6.23197	1.45772	0.00810866	0.0219454
2318	sp|Q9NY12|GAR1_HUMAN	sp|Q9NY12|GAR1_HUMAN	7	sp|Q9NY12|GAR1_HUMAN H/ACA ribonucleoprotein complex subunit 1 OS=Homo sapiens GN=GAR1 PE=1 SV=1	-0.4373	1.01496	sp|Q9NY12|GAR1_HUMAN	1.45226	-0.038004	2.94253	0.288831	2.1562	0.0550986	0.102711	-4.4861	0	695390	3633700	7741900	34037000	24639000	38284000	9728500	18324000	-2.04222	-0.733806	0.679625	0.347204	1.51738	1.4171	-0.235196	1.36056	-0.4373	1.01496	1.45226	0.0550986	0.102711
2547	sp|Q9Y467|SALL2_HUMAN	sp|Q9Y467|SALL2_HUMAN	4	sp|Q9Y467|SALL2_HUMAN Sal-like protein 2 OS=Homo sapiens GN=SALL2 PE=1 SV=4	-4.82306	-3.37484	sp|Q9Y467|SALL2_HUMAN	1.44822	-3.51604	6.41247	-3.73689	0.699674	0.508226	0.599407	-5.81197	4	NA	NA	NA	1290500	5545300	1514000	107540	NA	NA	NA	NA	-4.82306	-0.492083	-3.13981	-6.49263	NA	-4.82306	-3.37484	1.44822	0.508226	0.599407
1733	sp|Q8TDN6|BRX1_HUMAN	sp|Q8TDN6|BRX1_HUMAN	15	sp|Q8TDN6|BRX1_HUMAN Ribosome biogenesis protein BRX1 homolog OS=Homo sapiens GN=BRIX1 PE=1 SV=2	1.51241	2.9591	sp|Q8TDN6|BRX1_HUMAN	1.44669	0.310933	2.58244	2.23575	2.81838	0.0173557	0.0410005	-3.38963	0	4649100	14793000	29404000	59419000	88573000	146100000	91310000	39569000	0.780977	1.3223	2.71886	1.2275	3.24136	3.30638	2.87508	2.41358	1.51241	2.9591	1.44669	0.0173557	0.0410005
2075	sp|Q9BXY0|MAK16_HUMAN	sp|Q9BXY0|MAK16_HUMAN	6	sp|Q9BXY0|MAK16_HUMAN Protein MAK16 homolog OS=Homo sapiens GN=MAK16 PE=1 SV=2	-3.04001	-1.6012	sp|Q9BXY0|MAK16_HUMAN	1.43881	0.093322	2.7843	-2.21783	2.39817	0.0385372	0.0777996	-4.0558	1	229080	NA	1334200	3135300	2321900	8750100	2972300	1364300	-3.6922	NA	-2.00728	-3.42054	-1.66507	-0.665026	-1.88218	-2.19251	-3.04001	-1.6012	1.43881	0.0385372	0.0777996
907	sp|P62258|1433E_HUMAN	sp|P62258|1433E_HUMAN	18	sp|P62258|1433E_HUMAN 14-3-3 protein epsilon OS=Homo sapiens GN=YWHAE PE=1 SV=1	2.20131	3.63393	sp|P62258|1433E_HUMAN	1.43262	0.444437	2.42079	2.91762	3.20777	0.00877592	0.0234289	-2.72554	0	10408000	34235000	14827000	141910000	137710000	126160000	231290000	83453000	1.97849	2.5512	1.6726	2.60297	3.83599	3.09938	4.16604	3.43431	2.20131	3.63393	1.43262	0.00877592	0.0234289
202	sp|O60508|PRP17_HUMAN	sp|O60508|PRP17_HUMAN	7	sp|O60508|PRP17_HUMAN Pre-mRNA-processing factor 17 OS=Homo sapiens GN=CDC40 PE=1 SV=1	-2.66857	-1.23863	sp|O60508|PRP17_HUMAN	1.42995	-0.21682	3.07671	-1.85146	1.94735	0.0814813	0.139446	-4.75312	1	NA	1186500	411620	8588700	5095800	3087400	2300800	6896700	NA	-2.37301	-3.80431	-1.82839	-0.605983	-2.13459	-2.23788	0.0239489	-2.66857	-1.23863	1.42995	0.0814813	0.139446
476	sp|P16615|AT2A2_HUMAN	sp|P16615|AT2A2_HUMAN	13	sp|P16615|AT2A2_HUMAN Sarcoplasmic/endoplasmic reticulum calcium ATPase 2 OS=Homo sapiens GN=ATP2A2 PE=1 SV=1	-0.418514	1.011	sp|P16615|AT2A2_HUMAN	1.42952	0.0287336	2.8303	0.296245	2.25802	0.0462304	0.0895026	-4.32279	0	670440	12812000	4998200	17540000	15678000	27263000	28680000	13386000	-2.09651	1.11173	0.0109702	-0.700247	0.908266	0.938172	1.26652	0.931057	-0.418514	1.011	1.42952	0.0462304	0.0895026
400	sp|P07910|HNRPC_HUMAN;sp|O60812|HNRC1_HUMAN;sp|B2RXH8|HNRC2_HUMAN;sp|P0DMR1|HNRC4_HUMAN;sp|B7ZW38|HNRC3_HUMAN	sp|P07910|HNRPC_HUMAN	19	sp|P07910|HNRPC_HUMAN Heterogeneous nuclear ribonucleoproteins C1/C2 OS=Homo sapiens GN=HNRNPC PE=1 SV=4;sp|O60812|HNRC1_HUMAN Heterogeneous nuclear ribonucleoprotein C-like 1 OS=Homo sapiens GN=HNRNPCL1 PE=2 SV=1;sp|B2RXH8|HNRC2_HUMAN Heterogeneous nuclea	5.53931	6.96654	sp|P07910|HNRPC_HUMAN	1.42723	0.491536	2.36293	6.25292	3.37496	0.006564	0.0184857	-2.44039	0	104090000	240140000	285520000	716160000	1469800000	2504400000	1419900000	1005200000	5.40011	5.40413	6.19254	5.16045	7.02624	7.31487	6.68664	6.83841	5.53931	6.96654	1.42723	0.006564	0.0184857
1095	sp|Q12873|CHD3_HUMAN	sp|Q12873|CHD3_HUMAN	18	sp|Q12873|CHD3_HUMAN Chromodomain-helicase-DNA-binding protein 3 OS=Homo sapiens GN=CHD3 PE=1 SV=3	-4.94149	-3.52265	sp|Q12873|CHD3_HUMAN	1.41884	-1.15651	3.99419	-3.80642	1.28391	0.237194	0.334104	-5.30147	3	NA	205410	NA	NA	1690900	748610	351650	746160	NA	-4.94149	NA	NA	-2.09236	-4.13335	-4.84696	-3.01794	-4.94149	-3.52265	1.41884	0.237194	0.334104
1185	sp|Q14137|BOP1_HUMAN	sp|Q14137|BOP1_HUMAN	18	sp|Q14137|BOP1_HUMAN Ribosome biogenesis protein BOP1 OS=Homo sapiens GN=BOP1 PE=1 SV=2	0.823583	2.24211	sp|Q14137|BOP1_HUMAN	1.41853	-0.000293123	2.83734	1.53285	2.21217	0.0500394	0.0953132	-4.39665	0	2059600	10001000	18077000	51409000	62823000	136490000	24039000	28364000	-0.428809	0.748966	1.97545	0.99872	2.77852	3.2104	1.02133	1.95819	0.823583	2.24211	1.41853	0.0500394	0.0953132
1683	sp|Q8NCA5|FA98A_HUMAN	sp|Q8NCA5|FA98A_HUMAN	7	sp|Q8NCA5|FA98A_HUMAN Protein FAM98A OS=Homo sapiens GN=FAM98A PE=1 SV=1	-1.14887	0.269379	sp|Q8NCA5|FA98A_HUMAN	1.41825	-0.262631	3.09913	-0.439744	1.86691	0.0899381	0.150963	-4.93326	0	616100	1113000	6370400	22764000	15703000	37593000	8117600	3952100	-2.22211	-2.46667	0.381666	-0.28836	0.910412	1.39141	-0.486642	-0.737661	-1.14887	0.269379	1.41825	0.0899381	0.150963
2248	sp|Q9NQP4|PFD4_HUMAN	sp|Q9NQP4|PFD4_HUMAN	2	sp|Q9NQP4|PFD4_HUMAN Prefoldin subunit 4 OS=Homo sapiens GN=PFDN4 PE=1 SV=1	-3.23893	-1.82116	sp|Q9NQP4|PFD4_HUMAN	1.41777	-0.299533	3.13508	-2.53005	1.88286	0.0941291	0.157215	-4.79934	2	223400	1878400	300110	NA	NA	2481700	3523400	2480300	-3.72951	-1.70017	-4.28712	NA	NA	-2.44266	-1.64592	-1.37489	-3.23893	-1.82116	1.41777	0.0941291	0.157215
861	sp|P56537|IF6_HUMAN	sp|P56537|IF6_HUMAN	6	sp|P56537|IF6_HUMAN Eukaryotic translation initiation factor 6 OS=Homo sapiens GN=EIF6 PE=1 SV=1	0.425771	1.84062	sp|P56537|IF6_HUMAN	1.41485	0.0910409	2.73865	1.13319	2.3648	0.0384121	0.07768	-4.14889	0	2894300	8287900	17847000	16432000	41186000	61018000	26969000	27125000	0.0767505	0.473792	1.95589	-0.803344	2.20963	2.07468	1.18108	1.89709	0.425771	1.84062	1.41485	0.0384121	0.07768
1690	sp|Q8ND83|SLAI1_HUMAN	sp|Q8ND83|SLAI1_HUMAN	2	sp|Q8ND83|SLAI1_HUMAN SLAIN motif-containing protein 1 OS=Homo sapiens GN=SLAIN1 PE=1 SV=3	-3.2308	-1.81888	sp|Q8ND83|SLAI1_HUMAN	1.41192	0.0259609	2.79788	-2.62569	2.28463	0.0466115	0.0900189	-4.23548	1	283820	299450	1088400	4523200	1146800	5334200	NA	2300400	-3.37381	-4.38944	-2.31844	-2.8415	-2.61553	-1.36321	NA	-1.47789	-3.2308	-1.81888	1.41192	0.0466115	0.0900189
1547	sp|Q7Z589|EMSY_HUMAN	sp|Q7Z589|EMSY_HUMAN	18	sp|Q7Z589|EMSY_HUMAN BRCA2-interacting transcriptional repressor EMSY OS=Homo sapiens GN=EMSY PE=1 SV=2	0.29566	1.70467	sp|Q7Z589|EMSY_HUMAN	1.40901	0.225166	2.59286	1.00017	2.63347	0.0240132	0.0531625	-3.70223	0	1550400	9549300	5069500	62984000	39397000	49730000	26381000	24047000	-0.850811	0.681278	0.0326149	1.31956	2.14979	1.78611	1.15046	1.73234	0.29566	1.70467	1.40901	0.0240132	0.0531625
1928	sp|Q96MG7|NSE3_HUMAN	sp|Q96MG7|NSE3_HUMAN	3	sp|Q96MG7|NSE3_HUMAN Non-structural maintenance of chromosomes element 3 homolog OS=Homo sapiens GN=NSMCE3 PE=1 SV=1	-3.99928	-2.59047	sp|Q96MG7|NSE3_HUMAN	1.40881	-0.109496	2.92712	-3.29488	2.11618	0.0650437	0.117178	-4.4584	2	NA	277460	818860	1357200	1440200	2610300	NA	707130	NA	-4.50114	-2.75326	-4.74344	-2.30859	-2.37139	NA	-3.09143	-3.99928	-2.59047	1.40881	0.0650437	0.117178
2533	sp|Q9Y3B9|RRP15_HUMAN	sp|Q9Y3B9|RRP15_HUMAN	8	sp|Q9Y3B9|RRP15_HUMAN RRP15-like protein OS=Homo sapiens GN=RRP15 PE=1 SV=2	0.272239	1.6809	sp|Q9Y3B9|RRP15_HUMAN	1.40866	-0.331707	3.14902	0.976569	1.79091	0.102016	0.167309	-5.04572	0	742950	7236500	22238000	36689000	46986000	52204000	22979000	20637000	-1.94392	0.275111	2.29202	0.465746	2.38715	1.8546	0.958688	1.52316	0.272239	1.6809	1.40866	0.102016	0.167309
1836	sp|Q96AE4|FUBP1_HUMAN	sp|Q96AE4|FUBP1_HUMAN	21	sp|Q96AE4|FUBP1_HUMAN Far upstream element-binding protein 1 OS=Homo sapiens GN=FUBP1 PE=1 SV=3	2.2865	3.69402	sp|Q96AE4|FUBP1_HUMAN	1.40752	0.0757106	2.73933	2.99026	2.33841	0.0402154	0.0800913	-4.19208	0	4467500	34192000	37196000	160430000	73995000	207090000	304470000	83228000	0.721771	2.54936	3.07808	2.79678	2.99906	3.79852	4.54788	3.43062	2.2865	3.69402	1.40752	0.0402154	0.0800913
540	sp|P24941|CDK2_HUMAN	sp|P24941|CDK2_HUMAN	10	sp|P24941|CDK2_HUMAN Cyclin-dependent kinase 2 OS=Homo sapiens GN=CDK2 PE=1 SV=2	-1.375	0.0233414	sp|P24941|CDK2_HUMAN	1.39834	-0.144492	2.94118	-0.675831	2.00541	0.0712627	0.125508	-4.72265	0	426010	3572700	1036400	35691000	6307000	20324000	8238900	8780400	-2.77034	-0.758601	-2.39324	0.422173	-0.318662	0.523813	-0.46604	0.354254	-1.375	0.0233414	1.39834	0.0712627	0.125508
194	sp|O60306|AQR_HUMAN	sp|O60306|AQR_HUMAN	3	sp|O60306|AQR_HUMAN Intron-binding protein aquarius OS=Homo sapiens GN=AQR PE=1 SV=4	-4.42696	-3.02949	sp|O60306|AQR_HUMAN	1.39747	-0.832233	3.62717	-3.72823	1.4294	0.188411	0.277331	-5.41004	2	50828	1160800	194950	NA	1856100	NA	1475900	299370	-5.92945	-2.40508	-4.94636	NA	-1.96676	NA	-2.85458	-4.26714	-4.42696	-3.02949	1.39747	0.188411	0.277331
1273	sp|Q15398|DLGP5_HUMAN	sp|Q15398|DLGP5_HUMAN	18	sp|Q15398|DLGP5_HUMAN Disks large-associated protein 5 OS=Homo sapiens GN=DLGAP5 PE=1 SV=2	-0.121327	1.27431	sp|Q15398|DLGP5_HUMAN	1.39564	0.312744	2.47853	0.576491	2.85165	0.0163707	0.039263	-3.33309	0	1336500	5542300	4669900	45175000	25798000	40036000	28173000	12127000	-1.07141	-0.115529	-0.09285	0.794481	1.57932	1.48023	1.24175	0.795948	-0.121327	1.27431	1.39564	0.0163707	0.039263
1581	sp|Q86VV8|RTTN_HUMAN	sp|Q86VV8|RTTN_HUMAN	2	sp|Q86VV8|RTTN_HUMAN Rotatin OS=Homo sapiens GN=RTTN PE=1 SV=3	0.268769	1.66333	sp|Q86VV8|RTTN_HUMAN	1.39456	-0.79681	3.58594	1.19848	1.45138	0.182376	0.269848	-5.32913	2	NA	3109300	13240000	NA	58533000	14571000	73151000	18165000	NA	-0.962064	1.4996	NA	2.68322	0.0543797	2.56709	1.34864	0.268769	1.66333	1.39456	0.182376	0.269848
1463	sp|Q6N043|Z280D_HUMAN	sp|Q6N043|Z280D_HUMAN	4	sp|Q6N043|Z280D_HUMAN Zinc finger protein 280D OS=Homo sapiens GN=ZNF280D PE=1 SV=3	-3.6371	-2.2433	sp|Q6N043|Z280D_HUMAN	1.3938	-0.715275	3.50287	-2.80082	1.54009	0.16436	0.248329	-5.17115	3	436560	NA	NA	1543500	NA	1434900	5968400	1012400	-2.73399	NA	NA	-4.54021	NA	-3.21551	-0.91384	-2.60056	-3.6371	-2.2433	1.3938	0.16436	0.248329
1915	sp|Q96JH7|VCIP1_HUMAN	sp|Q96JH7|VCIP1_HUMAN	28	sp|Q96JH7|VCIP1_HUMAN Deubiquitinating protein VCIP135 OS=Homo sapiens GN=VCPIP1 PE=1 SV=2	1.07676	2.46239	sp|Q96JH7|VCIP1_HUMAN	1.38563	0.51317	2.25809	1.76958	3.51407	0.00516353	0.0152602	-2.20397	0	6953000	10838000	9545200	53500000	50912000	82789000	82302000	31888000	1.37906	0.866678	0.999598	1.06171	2.49527	2.50511	2.73081	2.11837	1.07676	2.46239	1.38563	0.00516353	0.0152602
1471	sp|Q6P1N0|C2D1A_HUMAN	sp|Q6P1N0|C2D1A_HUMAN	18	sp|Q6P1N0|C2D1A_HUMAN Coiled-coil and C2 domain-containing protein 1A OS=Homo sapiens GN=CC2D1A PE=1 SV=1	-1.25279	0.131674	sp|Q6P1N0|C2D1A_HUMAN	1.38446	-0.150543	2.91946	-0.560556	1.99563	0.0724525	0.127318	-4.73775	0	700270	3186000	1720100	20761000	2035800	16441000	23474000	15778000	-2.03183	-0.926375	-1.61906	-0.43388	-1.84225	0.224713	0.988292	1.15594	-1.25279	0.131674	1.38446	0.0724525	0.127318
2307	sp|Q9NWT1|PK1IP_HUMAN	sp|Q9NWT1|PK1IP_HUMAN	6	sp|Q9NWT1|PK1IP_HUMAN p21-activated protein kinase-interacting protein 1 OS=Homo sapiens GN=PAK1IP1 PE=1 SV=2	-1.35764	0.0261475	sp|Q9NWT1|PK1IP_HUMAN	1.38379	-0.362172	3.12975	-0.566905	1.77743	0.107307	0.174531	-5.00127	1	NA	1639300	7471900	4647300	9846900	19163000	7309600	6848900	NA	-1.89957	0.62538	-2.79873	0.281594	0.440835	-0.632274	0.0144356	-1.35764	0.0261475	1.38379	0.107307	0.174531
2007	sp|Q99986|VRK1_HUMAN	sp|Q99986|VRK1_HUMAN	8	sp|Q99986|VRK1_HUMAN Serine/threonine-protein kinase VRK1 OS=Homo sapiens GN=VRK1 PE=1 SV=1	-1.06933	0.31435	sp|Q99986|VRK1_HUMAN	1.38368	-0.131124	2.89849	-0.377491	2.0211	0.0693923	0.123225	-4.69837	0	2150700	2472400	4434900	5819600	5451800	45810000	20058000	4159400	-0.364496	-1.29775	-0.17175	-2.44333	-0.514996	1.67028	0.769849	-0.667731	-1.06933	0.31435	1.38368	0.0693923	0.123225
1257	sp|Q15154|PCM1_HUMAN	sp|Q15154|PCM1_HUMAN	23	sp|Q15154|PCM1_HUMAN Pericentriolar material 1 protein OS=Homo sapiens GN=PCM1 PE=1 SV=4	-0.825745	0.554976	sp|Q15154|PCM1_HUMAN	1.38072	-0.302972	3.06441	-0.135385	1.81448	0.0981207	0.162237	-5.0111	0	534090	12967000	4077400	9328900	23904000	18638000	19664000	5056400	-2.43437	1.12935	-0.300181	-1.69778	1.47658	0.401648	0.742293	-0.400614	-0.825745	0.554976	1.38072	0.0981207	0.162237
298	sp|O94992|HEXI1_HUMAN	sp|O94992|HEXI1_HUMAN	12	sp|O94992|HEXI1_HUMAN Protein HEXIM1 OS=Homo sapiens GN=HEXIM1 PE=1 SV=1	1.77192	3.14906	sp|O94992|HEXI1_HUMAN	1.37715	-0.0395351	2.79383	2.46049	2.15088	0.0556043	0.103274	-4.49456	0	13064000	19753000	4647300	197590000	92127000	135480000	95883000	68239000	2.31622	1.74578	-0.100263	3.12594	3.29437	3.19992	2.94296	3.15901	1.77192	3.14906	1.37715	0.0556043	0.103274
1806	sp|Q92804|RBP56_HUMAN	sp|Q92804|RBP56_HUMAN	7	sp|Q92804|RBP56_HUMAN TATA-binding protein-associated factor 2N OS=Homo sapiens GN=TAF15 PE=1 SV=1	1.29107	2.66385	sp|Q92804|RBP56_HUMAN	1.37278	0.415303	2.33025	1.97746	3.17236	0.0093349	0.0246425	-2.78601	0	6212800	9489500	12472000	89354000	42233000	108610000	78590000	54726000	1.2118	0.672078	1.40829	1.87211	2.24345	2.88807	2.66671	2.85716	1.29107	2.66385	1.37278	0.0093349	0.0246425
2240	sp|Q9NQ55|SSF1_HUMAN	sp|Q9NQ55|SSF1_HUMAN	12	sp|Q9NQ55|SSF1_HUMAN Suppressor of SWI4 1 homolog OS=Homo sapiens GN=PPAN PE=2 SV=1	-0.402677	0.965928	sp|Q9NQ55|SSF1_HUMAN	1.3686	-0.0914446	2.82865	0.379383	2.10216	0.0631537	0.114736	-4.51903	1	NA	2899700	8590000	14673000	30760000	37026000	15194000	8397800	NA	-1.06428	0.838474	-0.982229	1.81635	1.36997	0.384082	0.293314	-0.402677	0.965928	1.3686	0.0631537	0.114736
2040	sp|Q9BT92|TCHP_HUMAN	sp|Q9BT92|TCHP_HUMAN	15	sp|Q9BT92|TCHP_HUMAN Trichoplein keratin filament-binding protein OS=Homo sapiens GN=TCHP PE=1 SV=1	-0.811161	0.554793	sp|Q9BT92|TCHP_HUMAN	1.36595	-0.242891	2.9748	-0.128184	1.87858	0.0882046	0.148688	-4.91579	0	2327000	3992300	1002000	28086000	3273000	22820000	28855000	19698000	-0.247425	-0.595967	-2.44483	0.0435735	-1.20248	0.68722	1.27497	1.45947	-0.811161	0.554793	1.36595	0.0882046	0.148688
2366	sp|Q9P2S5|WRP73_HUMAN	sp|Q9P2S5|WRP73_HUMAN	2	sp|Q9P2S5|WRP73_HUMAN WD repeat-containing protein WRAP73 OS=Homo sapiens GN=WRAP73 PE=1 SV=1	-5.49645	-4.13131	sp|Q9P2S5|WRP73_HUMAN	1.36515	-0.116109	2.8464	-4.58635	2.10189	0.066543	0.119242	-4.43037	2	100560	NA	NA	583430	195910	1047300	561070	462880	-4.91559	NA	NA	-6.07732	-4.99646	-3.65971	-4.198	-3.67105	-5.49645	-4.13131	1.36515	0.066543	0.119242
2488	sp|Q9UQE7|SMC3_HUMAN	sp|Q9UQE7|SMC3_HUMAN	16	sp|Q9UQE7|SMC3_HUMAN Structural maintenance of chromosomes protein 3 OS=Homo sapiens GN=SMC3 PE=1 SV=2	-1.39024	-0.0257701	sp|Q9UQE7|SMC3_HUMAN	1.36447	-0.231917	2.96085	-0.708003	1.89119	0.0863674	0.146113	-4.89686	0	1609100	1492500	3831600	6239800	27942000	18430000	4864500	3315600	-0.795591	-2.03697	-0.395195	-2.33318	1.68688	0.385816	-1.19791	-0.977866	-1.39024	-0.0257701	1.36447	0.0863674	0.146113
599	sp|P31274|HXC9_HUMAN	sp|P31274|HXC9_HUMAN	8	sp|P31274|HXC9_HUMAN Homeobox protein Hox-C9 OS=Homo sapiens GN=HOXC9 PE=1 SV=3	-2.32086	-0.958104	sp|P31274|HXC9_HUMAN	1.36276	-0.133514	2.85903	-1.41236	2.07715	0.0692168	0.123006	-4.46687	2	1022100	NA	NA	3669900	3143000	5318600	7221000	4504300	-1.46993	NA	NA	-3.1718	-1.25709	-1.36734	-0.649213	-0.558767	-2.32086	-0.958104	1.36276	0.0692168	0.123006
721	sp|P46937|YAP1_HUMAN	sp|P46937|YAP1_HUMAN	19	sp|P46937|YAP1_HUMAN Transcriptional coactivator YAP1 OS=Homo sapiens GN=YAP1 PE=1 SV=2	2.22025	3.58203	sp|P46937|YAP1_HUMAN	1.36178	0.173501	2.55005	2.90114	2.5357	0.0285023	0.0608187	-3.86603	0	10551000	15077000	20581000	228910000	71929000	182770000	131640000	164400000	1.99876	1.35015	2.17369	3.3584	2.9609	3.62229	3.38319	4.36174	2.22025	3.58203	1.36178	0.0285023	0.0608187
1876	sp|Q96EP5|DAZP1_HUMAN	sp|Q96EP5|DAZP1_HUMAN	5	sp|Q96EP5|DAZP1_HUMAN DAZ-associated protein 1 OS=Homo sapiens GN=DAZAP1 PE=1 SV=1	-0.34351	1.01352	sp|Q96EP5|DAZP1_HUMAN	1.35703	0.0521034	2.66196	0.335006	2.30098	0.0429156	0.0844007	-4.25312	0	1491500	2230100	11190000	23185000	13214000	31801000	31744000	12282000	-0.908362	-1.44881	1.24254	-0.259407	0.677887	1.15537	1.40751	0.81332	-0.34351	1.01352	1.35703	0.0429156	0.0844007
1676	sp|Q8NB78|KDM1B_HUMAN	sp|Q8NB78|KDM1B_HUMAN	4	sp|Q8NB78|KDM1B_HUMAN Lysine-specific histone demethylase 1B OS=Homo sapiens GN=KDM1B PE=1 SV=3	-3.68336	-2.33676	sp|Q8NB78|KDM1B_HUMAN	1.3466	-0.563216	3.25641	-2.78563	1.60808	0.144075	0.22399	-5.12704	2	474790	NA	NA	1345200	2820000	2261000	881660	1818300	-2.60925	NA	NA	-4.75747	-1.4032	-2.57405	-3.57022	-1.79958	-3.68336	-2.33676	1.3466	0.144075	0.22399
2190	sp|Q9H9Y2|RPF1_HUMAN	sp|Q9H9Y2|RPF1_HUMAN	5	sp|Q9H9Y2|RPF1_HUMAN Ribosome production factor 1 OS=Homo sapiens GN=RPF1 PE=1 SV=2	-2.8001	-1.45372	sp|Q9H9Y2|RPF1_HUMAN	1.34639	0.258534	2.43425	-2.12691	2.73847	0.0199707	0.0459365	-3.52509	0	418340	1085700	1161000	2660000	3494800	7304200	2391800	2108700	-2.79734	-2.50304	-2.21976	-3.68028	-1.11414	-0.919819	-2.184	-1.59691	-2.8001	-1.45372	1.34639	0.0199707	0.0459365
922	sp|P62333|PRS10_HUMAN	sp|P62333|PRS10_HUMAN	2	sp|P62333|PRS10_HUMAN 26S protease regulatory subunit 10B OS=Homo sapiens GN=PSMC6 PE=1 SV=1	-4.86576	-3.5296	sp|P62333|PRS10_HUMAN	1.33617	-0.708845	3.38119	-4.59853	1.52266	0.168594	0.253913	-5.01936	3	107060	116790	195130	2275200	581920	NA	NA	NA	-4.82252	-5.76843	-4.94495	-3.92717	-3.5296	NA	NA	NA	-4.86576	-3.5296	1.33617	0.168594	0.253913
176	sp|O43660|PLRG1_HUMAN	sp|O43660|PLRG1_HUMAN	12	sp|O43660|PLRG1_HUMAN Pleiotropic regulator 1 OS=Homo sapiens GN=PLRG1 PE=1 SV=1	0.738846	2.0709	sp|O43660|PLRG1_HUMAN	1.33206	-0.34037	3.00449	1.40488	1.76232	0.106931	0.174039	-5.0874	0	883750	9998400	14845000	111250000	32316000	69891000	43934000	35774000	-1.68604	0.748585	1.67445	2.21839	1.88284	2.2662	1.85892	2.27566	0.738846	2.0709	1.33206	0.106931	0.174039
2174	sp|Q9H7E2|TDRD3_HUMAN	sp|Q9H7E2|TDRD3_HUMAN	12	sp|Q9H7E2|TDRD3_HUMAN Tudor domain-containing protein 3 OS=Homo sapiens GN=TDRD3 PE=1 SV=1	-0.712704	0.617108	sp|Q9H7E2|TDRD3_HUMAN	1.32981	-0.167685	2.82731	-0.0477983	1.96487	0.0763169	0.132627	-4.78502	0	803910	3087900	2334900	54819000	7573800	31392000	11015000	19793000	-1.82674	-0.972179	-1.15209	1.10019	-0.0720436	1.13711	-0.0626833	1.46605	-0.712704	0.617108	1.32981	0.0763169	0.132627
297	sp|O94973|AP2A2_HUMAN	sp|O94973|AP2A2_HUMAN	12	sp|O94973|AP2A2_HUMAN AP-2 complex subunit alpha-2 OS=Homo sapiens GN=AP2A2 PE=1 SV=2	-3.85351	-2.52626	sp|O94973|AP2A2_HUMAN	1.32725	-0.642591	3.2971	-3.41109	1.53667	0.160533	0.243482	-5.22055	2	88731	1193600	386460	2108300	2448600	1207400	NA	NA	-5.10154	-2.36427	-3.9007	-4.04754	-1.59348	-3.45903	NA	NA	-3.85351	-2.52626	1.32725	0.160533	0.243482
1965	sp|Q96T21|SEBP2_HUMAN	sp|Q96T21|SEBP2_HUMAN	9	sp|Q96T21|SEBP2_HUMAN Selenocysteine insertion sequence-binding protein 2 OS=Homo sapiens GN=SECISBP2 PE=1 SV=2	-2.29039	-0.963703	sp|Q96T21|SEBP2_HUMAN	1.32668	0.2575	2.39587	-1.62704	2.74551	0.0197252	0.0455048	-3.51317	0	336480	1466200	1073800	9685200	2525400	11426000	5810100	3115200	-3.12091	-2.06301	-2.33907	-1.63856	-1.55187	-0.288618	-0.951179	-1.06314	-2.29039	-0.963703	1.32668	0.0197252	0.0455048
809	sp|P52597|HNRPF_HUMAN	sp|P52597|HNRPF_HUMAN	17	sp|P52597|HNRPF_HUMAN Heterogeneous nuclear ribonucleoprotein F OS=Homo sapiens GN=HNRNPF PE=1 SV=3	2.36125	3.68434	sp|P52597|HNRPF_HUMAN	1.32309	0.0793594	2.56683	3.0228	2.35381	0.0391532	0.0785059	-4.16689	0	5032600	49515000	20984000	213900000	121050000	145540000	191360000	114870000	0.898756	3.09167	2.20332	3.25125	3.66225	3.30096	3.9028	3.87136	2.36125	3.68434	1.32309	0.0391532	0.0785059
1233	sp|Q14978|NOLC1_HUMAN	sp|Q14978|NOLC1_HUMAN	21	sp|Q14978|NOLC1_HUMAN Nucleolar and coiled-body phosphoprotein 1 OS=Homo sapiens GN=NOLC1 PE=1 SV=2	3.10033	4.42341	sp|Q14978|NOLC1_HUMAN	1.32308	0.378187	2.26798	3.76187	3.09822	0.0106254	0.027227	-2.91264	0	23334000	55953000	47808000	132190000	253220000	329280000	193900000	204920000	3.17813	3.27069	3.46162	2.49087	4.65669	4.45273	3.92112	4.66309	3.10033	4.42341	1.32308	0.0106254	0.027227
692	sp|P42696|RBM34_HUMAN	sp|P42696|RBM34_HUMAN	9	sp|P42696|RBM34_HUMAN RNA-binding protein 34 OS=Homo sapiens GN=RBM34 PE=1 SV=2	-1.39284	-0.0725978	sp|P42696|RBM34_HUMAN	1.32024	-0.0804459	2.72092	-0.732717	2.08555	0.0621838	0.113587	-4.59779	0	385650	3097700	4830500	9649500	8940800	17800000	5702400	7835400	-2.91824	-0.967538	-0.041181	-1.64439	0.151528	0.33675	-0.977168	0.198498	-1.39284	-0.0725978	1.32024	0.0621838	0.113587
44	REV__sp|Q9Y6M1|IF2B2_HUMAN	REV__sp|Q9Y6M1|IF2B2_HUMAN	2	sp|Q9Y6M1|IF2B2_HUMAN Insulin-like growth factor 2 mRNA-binding protein 2 OS=Homo sapiens GN=IGF2BP2 PE=1 SV=2	-2.67255	-1.35626	REV__sp|Q9Y6M1|IF2B2_HUMAN	1.31628	-0.568024	3.20059	-1.79502	1.59315	0.147383	0.227783	-5.14677	2	NA	2220000	NA	2329900	1488100	4425400	8677000	2945500	NA	-1.45546	NA	-3.88963	-2.2645	-1.6267	-0.394077	-1.13976	-2.67255	-1.35626	1.31628	0.147383	0.227783
2343	sp|Q9NZN8|CNOT2_HUMAN	sp|Q9NZN8|CNOT2_HUMAN	4	sp|Q9NZN8|CNOT2_HUMAN CCR4-NOT transcription complex subunit 2 OS=Homo sapiens GN=CNOT2 PE=1 SV=1	-2.56717	-1.25445	sp|Q9NZN8|CNOT2_HUMAN	1.31272	0.332395	2.29305	-1.91081	2.96285	0.0134681	0.0333173	-3.14371	0	600270	1236400	672060	5138300	2286200	5207100	4125300	4675500	-2.26079	-2.31267	-3.05516	-2.64005	-1.68595	-1.39723	-1.42686	-0.507741	-2.56717	-1.25445	1.31272	0.0134681	0.0333173
668	sp|P40424|PBX1_HUMAN	sp|P40424|PBX1_HUMAN	2	sp|P40424|PBX1_HUMAN Pre-B-cell leukemia transcription factor 1 OS=Homo sapiens GN=PBX1 PE=1 SV=1	NA	-3.98817	sp|P40424|PBX1_HUMAN	NA	NA	NA	-3.98817	NA	NA	NA	NA	4	NA	NA	NA	NA	275690	370380	1065000	765640	NA	NA	NA	NA	-4.53617	-5.12603	-3.30781	-2.98269	-5.2973	-3.98817	1.30912	0	0
2348	sp|Q9P032|NDUF4_HUMAN	sp|Q9P032|NDUF4_HUMAN	2	sp|Q9P032|NDUF4_HUMAN NADH dehydrogenase [ubiquinone] 1 alpha subcomplex assembly factor 4 OS=Homo sapiens GN=NDUFAF4 PE=1 SV=1	NA	-3.98839	sp|Q9P032|NDUF4_HUMAN	NA	NA	NA	-3.98839	NA	NA	NA	NA	4	NA	NA	NA	NA	631450	746170	99314	1827200	NA	NA	NA	NA	-3.41953	-4.13795	-6.60316	-1.7929	-5.2973	-3.98839	1.30891	0	0
2005	sp|Q99879|H2B1M_HUMAN;sp|Q99877|H2B1N_HUMAN;sp|Q93079|H2B1H_HUMAN;sp|Q5QNW6|H2B2F_HUMAN;sp|P62807|H2B1C_HUMAN;sp|P58876|H2B1D_HUMAN;sp|Q99880|H2B1L_HUMAN;sp|P57053|H2BFS_HUMAN;sp|O60814|H2B1K_HUMAN	sp|Q99879|H2B1M_HUMAN	9	sp|Q99879|H2B1M_HUMAN Histone H2B type 1-M OS=Homo sapiens GN=HIST1H2BM PE=1 SV=3;sp|Q99877|H2B1N_HUMAN Histone H2B type 1-N OS=Homo sapiens GN=HIST1H2BN PE=1 SV=3;sp|Q93079|H2B1H_HUMAN Histone H2B type 1-H OS=Homo sapiens GN=HIST1H2BH PE=1 SV=3;sp|Q5QNW6|	8.81572	10.1225	sp|Q99879|H2B1M_HUMAN	1.30676	0.321891	2.29163	9.4691	2.9358	0.0141227	0.0346411	-3.18983	0	1142700000	2386200000	2510200000	4378900000	13765000000	20848000000	14555000000	11961000000	8.96023	8.76711	9.51435	8.02119	10.0403	10.3044	9.91935	10.2258	8.81572	10.1225	1.30676	0.0141227	0.0346411
656	sp|P38159|RBMX_HUMAN	sp|P38159|RBMX_HUMAN	23	sp|P38159|RBMX_HUMAN RNA-binding motif protein, X chromosome OS=Homo sapiens GN=RBMX PE=1 SV=3	5.55263	6.85667	sp|P38159|RBMX_HUMAN	1.30404	0.410343	2.19773	6.20465	3.22857	0.00846365	0.0226722	-2.69003	0	120350000	231560000	263590000	722090000	1170600000	1751100000	1755500000	1063600000	5.61579	5.35085	6.07041	5.17348	6.71956	6.81012	6.98134	6.91565	5.55263	6.85667	1.30404	0.00846365	0.0226722
26	REV__sp|Q5JWF2|GNAS1_HUMAN	REV__sp|Q5JWF2|GNAS1_HUMAN	2	sp|Q5JWF2|GNAS1_HUMAN Guanine nucleotide-binding protein G(s) subunit alpha isoforms XLas OS=Homo sapiens GN=GNAS PE=1 SV=2	0.490312	1.79196	REV__sp|Q5JWF2|GNAS1_HUMAN	1.30164	-0.577228	3.18052	1.14113	1.53286	0.154745	0.236153	-5.40795	0	4534400	12163000	1695600	86607000	17575000	32061000	182550000	15162000	0.743857	1.0356	-1.64098	1.82277	1.06216	1.16686	3.83734	1.10147	0.490312	1.79196	1.30164	0.154745	0.236153
524	sp|P22626|ROA2_HUMAN	sp|P22626|ROA2_HUMAN	25	sp|P22626|ROA2_HUMAN Heterogeneous nuclear ribonucleoproteins A2/B1 OS=Homo sapiens GN=HNRNPA2B1 PE=1 SV=2	6.32719	7.62457	sp|P22626|ROA2_HUMAN	1.29738	0.282537	2.31223	6.97588	2.82863	0.0170459	0.0404711	-3.37221	0	147140000	294640000	508910000	1798100000	1864500000	3862600000	2315200000	2120900000	5.91443	5.70368	7.07572	6.61493	7.34674	7.92611	7.36574	7.85971	6.32719	7.62457	1.29738	0.0170459	0.0404711
53	sp|A6NKT7|RGPD3_HUMAN	sp|A6NKT7|RGPD3_HUMAN	52	sp|A6NKT7|RGPD3_HUMAN RanBP2-like and GRIP domain-containing protein 3 OS=Homo sapiens GN=RGPD3 PE=3 SV=2	1.34782	2.6439	sp|A6NKT7|RGPD3_HUMAN	1.29608	0.0782005	2.51396	1.99586	2.3547	0.0390924	0.0784508	-4.16543	0	12600000	17244000	11908000	31893000	119280000	69927000	66343000	34723000	2.26248	1.54683	1.33757	0.244409	3.6424	2.26693	2.4314	2.23488	1.34782	2.6439	1.29608	0.0390924	0.0784508
489	sp|P17844|DDX5_HUMAN	sp|P17844|DDX5_HUMAN	45	sp|P17844|DDX5_HUMAN Probable ATP-dependent RNA helicase DDX5 OS=Homo sapiens GN=DDX5 PE=1 SV=1	5.29899	6.59406	sp|P17844|DDX5_HUMAN	1.29507	0.244171	2.34598	5.94653	2.72672	0.0203871	0.0466669	-3.54496	0	56160000	198030000	195980000	1198100000	704980000	1418600000	1847400000	959440000	4.48321	5.12176	5.61751	5.97348	6.0363	6.51306	7.05222	6.77468	5.29899	6.59406	1.29507	0.0203871	0.0466669
561	sp|P27348|1433T_HUMAN	sp|P27348|1433T_HUMAN	9	sp|P27348|1433T_HUMAN 14-3-3 protein theta OS=Homo sapiens GN=YWHAQ PE=1 SV=1	-1.09939	0.195506	sp|P27348|1433T_HUMAN	1.2949	-0.14367	2.73347	-0.451944	1.99165	0.0729413	0.127986	-4.74387	0	440560	4202200	4882900	13350000	15093000	9363000	21858000	5078300	-2.72044	-0.520922	-0.0246937	-1.13152	0.857028	-0.569522	0.889219	-0.394702	-1.09939	0.195506	1.2949	0.0729413	0.127986
971	sp|P68371|TBB4B_HUMAN	sp|P68371|TBB4B_HUMAN	24	sp|P68371|TBB4B_HUMAN Tubulin beta-4B chain OS=Homo sapiens GN=TUBB4B PE=1 SV=1	3.67826	4.9711	sp|P68371|TBB4B_HUMAN	1.29284	0.342111	2.24357	4.32468	3.00883	0.0124253	0.0310632	-3.06528	0	33763000	61359000	74390000	241490000	347980000	572660000	508290000	157870000	3.72711	3.40577	4.13724	3.44293	5.08501	5.23338	5.25972	4.3063	3.67826	4.9711	1.29284	0.0124253	0.0310632
17	REV__sp|O14578|CTRO_HUMAN	REV__sp|O14578|CTRO_HUMAN	2	sp|O14578|CTRO_HUMAN Citron Rho-interacting kinase OS=Homo sapiens GN=CIT PE=1 SV=2	-2.61591	-1.32681	REV__sp|O14578|CTRO_HUMAN	1.2891	0.0759369	2.50226	-1.87928	2.383	0.0395308	0.0791287	-4.07993	1	483350	1208300	734850	NA	5639700	6964100	2430800	1971000	-2.5827	-2.34634	-2.91867	NA	-0.469339	-0.987082	-2.16153	-1.68928	-2.61591	-1.32681	1.2891	0.0395308	0.0791287
1361	sp|Q4G0J3|LARP7_HUMAN	sp|Q4G0J3|LARP7_HUMAN	23	sp|Q4G0J3|LARP7_HUMAN La-related protein 7 OS=Homo sapiens GN=LARP7 PE=1 SV=1	1.37248	2.66149	sp|Q4G0J3|LARP7_HUMAN	1.28901	0.272377	2.30564	2.01698	2.80544	0.0177546	0.0417756	-3.4116	0	7282000	22393000	7555500	69288000	82467000	60228000	90813000	44592000	1.44776	1.9295	0.642382	1.47027	3.14512	2.05629	2.8675	2.57704	1.37248	2.66149	1.28901	0.0177546	0.0417756
1207	sp|Q14562|DHX8_HUMAN	sp|Q14562|DHX8_HUMAN	13	sp|Q14562|DHX8_HUMAN ATP-dependent RNA helicase DHX8 OS=Homo sapiens GN=DHX8 PE=1 SV=1	-1.52372	-0.235287	sp|Q14562|DHX8_HUMAN	1.28843	-0.167978	2.74485	-0.879504	1.95743	0.0772793	0.133905	-4.79639	0	394310	2555600	1936500	19630000	10337000	10372000	19804000	2080700	-2.88524	-1.24928	-1.43798	-0.522384	0.34704	-0.425146	0.752147	-1.61519	-1.52372	-0.235287	1.28843	0.0772793	0.133905
972	sp|P68400|CSK21_HUMAN;sp|Q8NEV1|CSK23_HUMAN	sp|P68400|CSK21_HUMAN	14	sp|P68400|CSK21_HUMAN Casein kinase II subunit alpha OS=Homo sapiens GN=CSNK2A1 PE=1 SV=1;sp|Q8NEV1|CSK23_HUMAN Casein kinase II subunit alpha 3 OS=Homo sapiens GN=CSNK2A3 PE=1 SV=2	1.93781	3.21941	sp|P68400|CSK21_HUMAN	1.28159	0.168497	2.39469	2.57861	2.54757	0.0279157	0.0598375	-3.84621	0	6311200	35400000	11109000	149420000	64041000	172410000	144900000	61499000	1.23515	2.60021	1.23144	2.68445	2.8044	3.53997	3.5165	3.01676	1.93781	3.21941	1.28159	0.0279157	0.0598375
288	sp|O94842|TOX4_HUMAN	sp|O94842|TOX4_HUMAN	15	sp|O94842|TOX4_HUMAN TOX high mobility group box family member 4 OS=Homo sapiens GN=TOX4 PE=1 SV=1	3.25926	4.53998	sp|O94842|TOX4_HUMAN	1.28071	0.422361	2.13907	3.89962	3.30138	0.00745717	0.0204639	-2.56579	0	22689000	61655000	35802000	245360000	259910000	298730000	330100000	180900000	3.13648	3.41281	3.01971	3.46805	4.69183	4.31537	4.66015	4.49256	3.25926	4.53998	1.28071	0.00745717	0.0204639
607	sp|P31947|1433S_HUMAN	sp|P31947|1433S_HUMAN	3	sp|P31947|1433S_HUMAN 14-3-3 protein sigma OS=Homo sapiens GN=SFN PE=1 SV=1	0.242659	1.52313	sp|P31947|1433S_HUMAN	1.28047	0.000106977	2.56083	0.669482	2.28085	0.0499847	0.0952859	-4.16301	2	4296500	8831100	4913700	23400000	21752000	NA	39094000	NA	0.663777	0.566767	-0.0150851	-0.244823	1.34946	NA	1.69679	NA	0.242659	1.52313	1.28047	0.0499847	0.0952859
395	sp|P07437|TBB5_HUMAN	sp|P07437|TBB5_HUMAN	23	sp|P07437|TBB5_HUMAN Tubulin beta chain OS=Homo sapiens GN=TUBB PE=1 SV=2	1.68405	2.9639	sp|P07437|TBB5_HUMAN	1.27985	0.373799	2.18591	2.32397	3.12547	0.0101313	0.0261565	-2.8661	0	9593800	16100000	17108000	72469000	65498000	152160000	112680000	41843000	1.85745	1.44629	1.89126	1.54119	2.83471	3.36371	3.16718	2.49001	1.68405	2.9639	1.27985	0.0101313	0.0261565
923	sp|P62380|TBPL1_HUMAN	sp|P62380|TBPL1_HUMAN	4	sp|P62380|TBPL1_HUMAN TATA box-binding protein-like protein 1 OS=Homo sapiens GN=TBPL1 PE=1 SV=1	-2.05654	-0.777821	sp|P62380|TBPL1_HUMAN	1.27872	-0.348147	2.90558	-1.41718	1.73913	0.111073	0.179913	-5.12094	0	695410	1335400	376290	26594000	3709000	8975300	4422900	6216800	-2.04218	-2.19986	-3.94145	-0.0426691	-1.03399	-0.629179	-1.3301	-0.118016	-2.05654	-0.777821	1.27872	0.111073	0.179913
2528	sp|Q9Y3A2|UTP11_HUMAN	sp|Q9Y3A2|UTP11_HUMAN	8	sp|Q9Y3A2|UTP11_HUMAN Probable U3 small nucleolar RNA-associated protein 11 OS=Homo sapiens GN=UTP11 PE=1 SV=2	-0.999304	0.278526	sp|Q9Y3A2|UTP11_HUMAN	1.27783	-0.451564	3.00722	-0.360389	1.63489	0.131539	0.207925	-5.26864	0	2524500	697920	6669400	13009000	21976000	22485000	8577900	4683200	-0.126376	-3.15019	0.451757	-1.1724	1.36327	0.666358	-0.410032	-0.50549	-0.999304	0.278526	1.27783	0.131539	0.207925
735	sp|P48730|KC1D_HUMAN	sp|P48730|KC1D_HUMAN	14	sp|P48730|KC1D_HUMAN Casein kinase I isoform delta OS=Homo sapiens GN=CSNK1D PE=1 SV=2	-2.87785	-1.60116	sp|P48730|KC1D_HUMAN	1.2767	-1.49653	4.04992	-1.92033	1.10413	0.30847	0.408066	-5.46161	4	NA	840550	NA	NA	NA	5752500	8264700	710430	NA	-2.87785	NA	NA	NA	-1.25671	-0.461697	-3.08506	-2.87785	-1.60116	1.2767	0.30847	0.408066
2137	sp|Q9H2M9|RBGPR_HUMAN	sp|Q9H2M9|RBGPR_HUMAN	3	sp|Q9H2M9|RBGPR_HUMAN Rab3 GTPase-activating protein non-catalytic subunit OS=Homo sapiens GN=RAB3GAP2 PE=1 SV=1	-2.82062	-1.54596	sp|Q9H2M9|RBGPR_HUMAN	1.27465	-1.23708	3.78639	-2.50196	1.21712	0.265617	0.363394	-5.34411	4	NA	1391700	1155100	2046000	NA	NA	3786300	NA	NA	-2.13938	-2.22755	-4.09493	NA	NA	-1.54596	NA	-2.82062	-1.54596	1.27465	0.265617	0.363394
1770	sp|Q8WY36|BBX_HUMAN	sp|Q8WY36|BBX_HUMAN	8	sp|Q8WY36|BBX_HUMAN HMG box transcription factor BBX OS=Homo sapiens GN=BBX PE=1 SV=1	-2.15299	-0.885243	sp|Q8WY36|BBX_HUMAN	1.26774	-0.563211	3.0987	-1.30782	1.57911	0.150558	0.23145	-5.16524	2	NA	NA	703420	11845000	6407600	13569000	5979200	1274000	NA	NA	-2.98547	-1.3205	-0.29734	-0.0461254	-0.911329	-2.28618	-2.15299	-0.885243	1.26774	0.150558	0.23145
2280	sp|Q9NUL3|STAU2_HUMAN	sp|Q9NUL3|STAU2_HUMAN	10	sp|Q9NUL3|STAU2_HUMAN Double-stranded RNA-binding protein Staufen homolog 2 OS=Homo sapiens GN=STAU2 PE=1 SV=1	-2.03005	-0.763486	sp|Q9NUL3|STAU2_HUMAN	1.26656	-1.05102	3.58414	-1.3063	1.22559	0.249731	0.34689	-5.7167	1	NA	838000	2184700	7931600	5033000	21869000	761880	11427000	NA	-2.8823	-1.25369	-1.95414	-0.622692	0.627171	-3.77304	0.714622	-2.03005	-0.763486	1.26656	0.249731	0.34689
2424	sp|Q9UKK6|NXT1_HUMAN;sp|Q9NPJ8|NXT2_HUMAN	sp|Q9UKK6|NXT1_HUMAN	2	sp|Q9UKK6|NXT1_HUMAN NTF2-related export protein 1 OS=Homo sapiens GN=NXT1 PE=1 SV=1;sp|Q9NPJ8|NXT2_HUMAN NTF2-related export protein 2 OS=Homo sapiens GN=NXT2 PE=1 SV=1	-2.9396	-1.67543	sp|Q9UKK6|NXT1_HUMAN	1.26416	-0.778557	3.30688	-1.99147	1.48426	0.184228	0.271907	-5.04081	4	NA	NA	NA	4250900	3650100	3795800	2491000	NA	NA	NA	NA	-2.9396	-1.05556	-1.84319	-2.12755	NA	-2.9396	-1.67543	1.26416	0.184228	0.271907
136	sp|O15226|NKRF_HUMAN	sp|O15226|NKRF_HUMAN	20	sp|O15226|NKRF_HUMAN NF-kappa-B-repressing factor OS=Homo sapiens GN=NKRF PE=1 SV=2	1.23222	2.4923	sp|O15226|NKRF_HUMAN	1.26008	0.219239	2.30092	1.86226	2.67869	0.022181	0.0497125	-3.62608	0	3416000	17851000	14978000	63014000	79797000	80401000	58862000	32382000	0.323009	1.5975	1.68808	1.32031	3.10077	2.46383	2.26521	2.1394	1.23222	2.4923	1.26008	0.022181	0.0497125
224	sp|O75113|N4BP1_HUMAN	sp|O75113|N4BP1_HUMAN	21	sp|O75113|N4BP1_HUMAN NEDD4-binding protein 1 OS=Homo sapiens GN=N4BP1 PE=1 SV=4	0.418459	1.67534	sp|O75113|N4BP1_HUMAN	1.25688	0.350798	2.16296	1.0469	3.06927	0.0111773	0.0283945	-2.96208	0	3812200	10158000	5654000	31337000	20984000	64074000	35311000	23507000	0.486069	0.771779	0.199364	0.216623	1.30103	2.14362	1.55543	1.70127	0.418459	1.67534	1.25688	0.0111773	0.0283945
2170	sp|Q9H6Z4|RANB3_HUMAN	sp|Q9H6Z4|RANB3_HUMAN	13	sp|Q9H6Z4|RANB3_HUMAN Ran-binding protein 3 OS=Homo sapiens GN=RANBP3 PE=1 SV=1	2.46486	3.71847	sp|Q9H6Z4|RANB3_HUMAN	1.25361	0.335455	2.17177	3.09166	3.02103	0.0121624	0.0305355	-3.04445	0	11794000	46207000	20038000	139150000	95846000	224870000	186760000	104540000	2.16425	2.9904	2.13283	2.57194	3.34769	3.91471	3.86901	3.74247	2.46486	3.71847	1.25361	0.0121624	0.0305355
1218	sp|Q14690|RRP5_HUMAN	sp|Q14690|RRP5_HUMAN	46	sp|Q14690|RRP5_HUMAN Protein RRP5 homolog OS=Homo sapiens GN=PDCD11 PE=1 SV=3	1.83135	3.07397	sp|Q14690|RRP5_HUMAN	1.24263	0.0167511	2.4685	2.45266	2.24286	0.0474574	0.0912047	-4.34725	0	6375000	20292000	37474000	58417000	122530000	172800000	64129000	48426000	1.2501	1.78521	3.08946	1.20063	3.67862	3.54315	2.38425	2.68987	1.83135	3.07397	1.24263	0.0474574	0.0912047
1181	sp|Q14011|CIRBP_HUMAN	sp|Q14011|CIRBP_HUMAN	3	sp|Q14011|CIRBP_HUMAN Cold-inducible RNA-binding protein OS=Homo sapiens GN=CIRBP PE=1 SV=1	-1.33157	-0.0894903	sp|Q14011|CIRBP_HUMAN	1.24208	-0.540769	3.02493	-0.710531	1.5415	0.15265	0.233325	-5.39637	0	291350	1840400	8497800	13764000	3703700	19537000	18403000	4911500	-3.3349	-1.7301	0.821984	-1.08327	-1.03591	0.468102	0.650235	-0.440384	-1.33157	-0.0894903	1.24208	0.15265	0.233325
1514	sp|Q71DI3|H32_HUMAN	sp|Q71DI3|H32_HUMAN	12	sp|Q71DI3|H32_HUMAN Histone H3.2 OS=Homo sapiens GN=HIST2H3A PE=1 SV=3	-3.95509	-2.7135	sp|Q71DI3|H32_HUMAN	1.24159	-0.979275	3.46246	-3.21014	1.30285	0.23098	0.326917	-5.45943	3	NA	452710	333470	NA	3171600	2466000	NA	263060	NA	-3.78413	-4.12605	NA	-1.24489	-2.45162	NA	-4.444	-3.95509	-2.7135	1.24159	0.23098	0.326917
2450	sp|Q9ULW0|TPX2_HUMAN	sp|Q9ULW0|TPX2_HUMAN	42	sp|Q9ULW0|TPX2_HUMAN Targeting protein for Xklp2 OS=Homo sapiens GN=TPX2 PE=1 SV=2	3.65319	4.8936	sp|Q9ULW0|TPX2_HUMAN	1.24041	0.153615	2.32721	4.2734	2.52538	0.0290219	0.0617043	-3.88325	0	23796000	44689000	60421000	516670000	214490000	408640000	519600000	280750000	3.20726	2.94148	3.81942	4.6446	4.43303	4.75733	5.29029	5.09375	3.65319	4.8936	1.24041	0.0290219	0.0617043
2519	sp|Q9Y2X3|NOP58_HUMAN	sp|Q9Y2X3|NOP58_HUMAN	22	sp|Q9Y2X3|NOP58_HUMAN Nucleolar protein 58 OS=Homo sapiens GN=NOP58 PE=1 SV=1	2.96866	4.20419	sp|Q9Y2X3|NOP58_HUMAN	1.23552	-0.0820025	2.55305	3.58642	2.07492	0.0633224	0.114926	-4.61447	0	12643000	29923000	79251000	184670000	304990000	454710000	123910000	101510000	2.26754	2.35404	4.23397	3.01909	4.90734	4.90803	3.29914	3.70224	2.96866	4.20419	1.23552	0.0633224	0.114926
1669	sp|Q8N7H5|PAF1_HUMAN	sp|Q8N7H5|PAF1_HUMAN	6	sp|Q8N7H5|PAF1_HUMAN RNA polymerase II-associated factor 1 homolog OS=Homo sapiens GN=PAF1 PE=1 SV=2	-2.11342	-0.878598	sp|Q8N7H5|PAF1_HUMAN	1.23482	0.163457	2.30619	-1.49601	2.55021	0.0277872	0.0596161	-3.8418	0	411240	2508800	834170	9740200	5205300	6745100	6598700	2965500	-2.82277	-1.27635	-2.72495	-1.62961	-0.577337	-1.03216	-0.774392	-1.13051	-2.11342	-0.878598	1.23482	0.0277872	0.0596161
2478	sp|Q9UPT9|UBP22_HUMAN	sp|Q9UPT9|UBP22_HUMAN	5	sp|Q9UPT9|UBP22_HUMAN Ubiquitin carboxyl-terminal hydrolase 22 OS=Homo sapiens GN=USP22 PE=1 SV=2	-2.48746	-1.2529	sp|Q9UPT9|UBP22_HUMAN	1.23456	-0.170001	2.63913	-1.66442	2.00462	0.0776702	0.134484	-4.57311	2	NA	1384900	779590	NA	2646700	6095700	2922500	4904600	NA	-2.14656	-2.82836	NA	-1.48866	-1.17496	-1.90565	-0.442307	-2.48746	-1.2529	1.23456	0.0776702	0.134484
1927	sp|Q96ME7|ZN512_HUMAN	sp|Q96ME7|ZN512_HUMAN	11	sp|Q96ME7|ZN512_HUMAN Zinc finger protein 512 OS=Homo sapiens GN=ZNF512 PE=1 SV=2	-1.199	0.0287041	sp|Q96ME7|ZN512_HUMAN	1.22771	-0.546428	3.00184	-0.585149	1.53115	0.155165	0.236556	-5.41025	0	293490	2046000	3451300	41435000	3425200	15454000	21009000	8343800	-3.32403	-1.575	-0.55493	0.657945	-1.14124	0.137377	0.834191	0.28449	-1.199	0.0287041	1.22771	0.155165	0.236556
164	sp|O43390|HNRPR_HUMAN	sp|O43390|HNRPR_HUMAN	25	sp|O43390|HNRPR_HUMAN Heterogeneous nuclear ribonucleoprotein R OS=Homo sapiens GN=HNRNPR PE=1 SV=1	3.47363	4.69827	sp|O43390|HNRPR_HUMAN	1.22464	0.162338	2.28694	4.08595	2.55076	0.0277604	0.0596128	-3.84088	0	16057000	54560000	88860000	271700000	296200000	467040000	330690000	159080000	2.62274	3.23377	4.40885	3.62916	4.86793	4.94577	4.66263	4.31674	3.47363	4.69827	1.22464	0.0277604	0.0596128
2532	sp|Q9Y3B7|RM11_HUMAN	sp|Q9Y3B7|RM11_HUMAN	7	sp|Q9Y3B7|RM11_HUMAN 39S ribosomal protein L11, mitochondrial OS=Homo sapiens GN=MRPL11 PE=1 SV=1	-2.04159	-0.820405	sp|Q9Y3B7|RM11_HUMAN	1.22118	-1.13122	3.57359	-1.431	1.14862	0.276099	0.375775	-5.87725	0	91348	1038300	8740500	11231000	5702000	16730000	5153200	1618800	-5.05835	-2.56842	0.865015	-1.4046	-0.454537	0.249295	-1.11783	-1.95855	-2.04159	-0.820405	1.22118	0.276099	0.375775
2357	sp|Q9P275|UBP36_HUMAN	sp|Q9P275|UBP36_HUMAN	6	sp|Q9P275|UBP36_HUMAN Ubiquitin carboxyl-terminal hydrolase 36 OS=Homo sapiens GN=USP36 PE=1 SV=3	-3.80093	-2.59243	sp|Q9P275|UBP36_HUMAN	1.2085	-1.46003	3.87704	-3.19668	1.03284	0.330022	0.43102	-5.85718	2	53799	NA	419960	8832900	2668000	4350600	405610	NA	-5.84503	NA	-3.77366	-1.78409	-1.47786	-1.65075	-4.64867	NA	-3.80093	-2.59243	1.2085	0.330022	0.43102
363	sp|P04843|RPN1_HUMAN	sp|P04843|RPN1_HUMAN	20	sp|P04843|RPN1_HUMAN Dolichyl-diphosphooligosaccharide--protein glycosyltransferase subunit 1 OS=Homo sapiens GN=RPN1 PE=1 SV=1	1.29032	2.49461	sp|P04843|RPN1_HUMAN	1.20429	0.183116	2.22547	1.89246	2.6094	0.0250489	0.0546859	-3.74267	0	5235800	13797000	16542000	56347000	44343000	105420000	107070000	23954000	0.957573	1.22021	1.83985	1.14363	2.30914	2.84602	3.09624	1.72704	1.29032	2.49461	1.20429	0.0250489	0.0546859
2122	sp|Q9H0S4|DDX47_HUMAN	sp|Q9H0S4|DDX47_HUMAN	12	sp|Q9H0S4|DDX47_HUMAN Probable ATP-dependent RNA helicase DDX47 OS=Homo sapiens GN=DDX47 PE=1 SV=1	-0.906375	0.295698	sp|Q9H0S4|DDX47_HUMAN	1.20207	-0.0256018	2.42975	-0.305339	2.16649	0.0541338	0.101393	-4.46972	0	669570	5482200	4710200	11880000	12109000	23655000	9013200	7994100	-2.09844	-0.131498	-0.0797193	-1.31584	0.560223	0.737916	-0.341274	0.225926	-0.906375	0.295698	1.20207	0.0541338	0.101393
2571	sp|Q9Y5Q9|TF3C3_HUMAN	sp|Q9Y5Q9|TF3C3_HUMAN	6	sp|Q9Y5Q9|TF3C3_HUMAN General transcription factor 3C polypeptide 3 OS=Homo sapiens GN=GTF3C3 PE=1 SV=1	-3.14739	-1.94561	sp|Q9Y5Q9|TF3C3_HUMAN	1.20179	-0.592289	2.99586	-2.42632	1.56108	0.159391	0.242529	-5.14442	3	NA	883470	NA	3000700	3518600	4461800	1222100	NA	NA	-2.80492	NA	-3.48987	-1.10499	-1.61514	-3.11668	NA	-3.14739	-1.94561	1.20179	0.159391	0.242529
605	sp|P31943|HNRH1_HUMAN	sp|P31943|HNRH1_HUMAN	20	sp|P31943|HNRH1_HUMAN Heterogeneous nuclear ribonucleoprotein H OS=Homo sapiens GN=HNRNPH1 PE=1 SV=4	4.73699	5.93787	sp|P31943|HNRH1_HUMAN	1.20088	0.189308	2.21245	5.33743	2.62671	0.0242997	0.0535956	-3.71359	0	34863000	177550000	157020000	619940000	573760000	1117900000	712060000	580630000	3.77475	4.96188	5.27882	4.9325	5.75879	6.17701	5.72797	6.0877	4.73699	5.93787	1.20088	0.0242997	0.0535956
1707	sp|Q8NFU7|TET1_HUMAN	sp|Q8NFU7|TET1_HUMAN	5	sp|Q8NFU7|TET1_HUMAN Methylcytosine dioxygenase TET1 OS=Homo sapiens GN=TET1 PE=1 SV=2	-2.74195	-1.54568	sp|Q8NFU7|TET1_HUMAN	1.19627	-0.432671	2.82521	-2.05837	1.64695	0.132044	0.208265	-5.18425	1	NA	1089900	804120	4229800	4953700	1173900	3998900	4468000	NA	-2.49738	-2.78102	-2.94746	-0.64409	-3.49872	-1.47008	-0.569835	-2.74195	-1.54568	1.19627	0.132044	0.208265
1381	sp|Q58FF8|H90B2_HUMAN	sp|Q58FF8|H90B2_HUMAN	6	sp|Q58FF8|H90B2_HUMAN Putative heat shock protein HSP 90-beta 2 OS=Homo sapiens GN=HSP90AB2P PE=1 SV=2	-4.26313	-3.07134	sp|Q58FF8|H90B2_HUMAN	1.19179	0.0768038	2.30678	-3.58211	2.3971	0.0386063	0.0778726	-4.0575	1	NA	195390	408350	2231000	941670	1914000	974250	670740	NA	-5.01474	-3.8165	-3.95816	-2.88107	-2.80909	-3.43152	-3.1637	-4.26313	-3.07134	1.19179	0.0386063	0.0778726
679	sp|P41250|SYG_HUMAN	sp|P41250|SYG_HUMAN	2	sp|P41250|SYG_HUMAN Glycine--tRNA ligase OS=Homo sapiens GN=GARS PE=1 SV=3	-6.27964	-5.08997	sp|P41250|SYG_HUMAN	1.18967	-0.656713	3.03605	-5.48652	1.46948	0.177533	0.264506	-5.30639	2	NA	NA	75463	552780	515400	351720	95548	201170	NA	NA	-6.39669	-6.16258	-3.69315	-5.19896	-6.65685	-4.8109	-6.27964	-5.08997	1.18967	0.177533	0.264506
1265	sp|Q15329|E2F5_HUMAN	sp|Q15329|E2F5_HUMAN	5	sp|Q15329|E2F5_HUMAN Transcription factor E2F5 OS=Homo sapiens GN=E2F5 PE=1 SV=1	-1.91061	-0.721898	sp|Q15329|E2F5_HUMAN	1.18871	0.129796	2.24762	-1.31625	2.48384	0.0312093	0.0656452	-3.95237	0	1052600	1278100	1337600	7958900	2628000	6247900	9711900	6719600	-1.42624	-2.26409	-2.00339	-1.94871	-1.49821	-1.14017	-0.237568	-0.0116347	-1.91061	-0.721898	1.18871	0.0312093	0.0656452
691	sp|P42694|HELZ_HUMAN	sp|P42694|HELZ_HUMAN	11	sp|P42694|HELZ_HUMAN Probable helicase with zinc finger domain OS=Homo sapiens GN=HELZ PE=1 SV=2	-2.20812	-1.02058	sp|P42694|HELZ_HUMAN	1.18754	-0.191031	2.56612	-1.61435	1.90602	0.0842498	0.143249	-4.8745	0	455940	3072900	437370	10761000	3421900	5868600	9248600	2424900	-2.66945	-0.979311	-3.71159	-1.47214	-1.14254	-1.22852	-0.305463	-1.40579	-2.20812	-1.02058	1.18754	0.0842498	0.143249
1416	sp|Q5TC82|RC3H1_HUMAN	sp|Q5TC82|RC3H1_HUMAN	14	sp|Q5TC82|RC3H1_HUMAN Roquin-1 OS=Homo sapiens GN=RC3H1 PE=1 SV=1	-1.1939	-0.00719073	sp|Q5TC82|RC3H1_HUMAN	1.18671	-0.260629	2.63405	-0.600546	1.81419	0.0981672	0.162237	-5.01152	0	868170	3470600	1745200	17934000	1885100	22490000	22724000	8483800	-1.71247	-0.801065	-1.59692	-0.66515	-1.94587	0.666671	0.943188	0.30725	-1.1939	-0.00719073	1.18671	0.0981672	0.162237
1379	sp|Q562F6|SGO2_HUMAN	sp|Q562F6|SGO2_HUMAN	3	sp|Q562F6|SGO2_HUMAN Shugoshin 2 OS=Homo sapiens GN=SGO2 PE=1 SV=2	-4.50089	-3.31847	sp|Q562F6|SGO2_HUMAN	1.18241	-1.12597	3.49079	-3.61408	1.22851	0.261593	0.359557	-5.33187	4	NA	NA	NA	1582400	1042400	1844600	502880	NA	NA	NA	NA	-4.50089	-2.74414	-2.86119	-4.35009	NA	-4.50089	-3.31847	1.18241	0.261593	0.359557
1178	sp|Q13948|CASP_HUMAN	sp|Q13948|CASP_HUMAN	9	sp|Q13948|CASP_HUMAN Protein CASP OS=Homo sapiens GN=CUX1 PE=1 SV=2	-6.0838	-4.90474	sp|Q13948|CASP_HUMAN	1.17906	-1.47063	3.82875	-5.14056	1.037	0.331824	0.433134	-5.56059	3	NA	NA	NA	581040	742780	493340	141240	114430	NA	NA	NA	-6.0838	-3.20074	-4.72163	-6.11398	-5.58262	-6.0838	-4.90474	1.17906	0.331824	0.433134
1064	sp|Q07021|C1QBP_HUMAN	sp|Q07021|C1QBP_HUMAN	9	sp|Q07021|C1QBP_HUMAN Complement component 1 Q subcomponent-binding protein, mitochondrial OS=Homo sapiens GN=C1QBP PE=1 SV=1	2.45239	3.63125	sp|Q07021|C1QBP_HUMAN	1.17887	0.0960788	2.26166	3.04182	2.40896	0.0355681	0.0730555	-4.07628	0	14064000	29421000	18395000	188600000	138300000	351990000	99379000	67482000	2.42582	2.32926	2.0021	3.05236	3.84175	4.54681	2.9927	3.14375	2.45239	3.63125	1.17887	0.0355681	0.0730555
566	sp|P27695|APEX1_HUMAN	sp|P27695|APEX1_HUMAN	5	sp|P27695|APEX1_HUMAN DNA-(apurinic or apyrimidinic site) lyase OS=Homo sapiens GN=APEX1 PE=1 SV=2	-2.32449	-1.14701	sp|P27695|APEX1_HUMAN	1.17747	-0.565315	2.92027	-1.81986	1.51518	0.162119	0.245415	-5.3612	1	468280	697500	1427300	9843700	833350	10667000	11443000	NA	-2.62977	-3.15107	-1.9042	-1.61291	-3.04572	-0.385583	-0.0097339	NA	-2.32449	-1.14701	1.17747	0.162119	0.245415
1526	sp|Q7L2J0|MEPCE_HUMAN	sp|Q7L2J0|MEPCE_HUMAN	21	sp|Q7L2J0|MEPCE_HUMAN 7SK snRNA methylphosphate capping enzyme OS=Homo sapiens GN=MEPCE PE=1 SV=1	1.32396	2.49986	sp|Q7L2J0|MEPCE_HUMAN	1.1759	0.129845	2.22195	1.91191	2.48728	0.0310222	0.0654267	-3.94666	0	4174800	16011000	9402400	114220000	50455000	68730000	94393000	37842000	0.62108	1.43818	0.976564	2.26002	2.48312	2.24257	2.9212	2.35253	1.32396	2.49986	1.1759	0.0310222	0.0654267
1474	sp|Q6P1X6|CH082_HUMAN	sp|Q6P1X6|CH082_HUMAN	2	sp|Q6P1X6|CH082_HUMAN UPF0598 protein C8orf82 OS=Homo sapiens GN=C8orf82 PE=1 SV=2	-5.00353	-3.8313	sp|Q6P1X6|CH082_HUMAN	1.17223	-1.68486	4.02931	-4.06575	0.956152	0.368623	0.471518	-5.63674	3	NA	NA	NA	1151200	301120	537780	415190	1967500	NA	NA	NA	-5.00353	-4.41729	-4.59996	-4.61625	-1.69171	-5.00353	-3.8313	1.17223	0.368623	0.471518
1882	sp|Q96EY7|PTCD3_HUMAN	sp|Q96EY7|PTCD3_HUMAN	3	sp|Q96EY7|PTCD3_HUMAN Pentatricopeptide repeat domain-containing protein 3, mitochondrial OS=Homo sapiens GN=PTCD3 PE=1 SV=3	-4.33837	-3.16865	sp|Q96EY7|PTCD3_HUMAN	1.16972	-1.13965	3.4791	-3.83706	1.13591	0.28371	0.38458	-5.816	1	95753	243310	386080	2514100	3146000	3068800	141950	NA	-4.98837	-4.6935	-3.9022	-3.76941	-1.25581	-2.14312	-6.10702	NA	-4.33837	-3.16865	1.16972	0.28371	0.38458
2249	sp|Q9NQS7|INCE_HUMAN	sp|Q9NQS7|INCE_HUMAN	14	sp|Q9NQS7|INCE_HUMAN Inner centromere protein OS=Homo sapiens GN=INCENP PE=1 SV=3	-0.19048	0.975505	sp|Q9NQS7|INCE_HUMAN	1.16599	0.0727683	2.2592	0.392513	2.35991	0.0387401	0.0780626	-4.1569	0	1589600	4401100	4549800	40906000	13078000	19656000	22718000	25612000	-0.813708	-0.453192	-0.132664	0.637644	0.663948	0.476668	0.942821	1.81858	-0.19048	0.975505	1.16599	0.0387401	0.0780626
2561	sp|Q9Y5A6|ZSC21_HUMAN	sp|Q9Y5A6|ZSC21_HUMAN	7	sp|Q9Y5A6|ZSC21_HUMAN Zinc finger and SCAN domain-containing protein 21 OS=Homo sapiens GN=ZSCAN21 PE=1 SV=2	-2.23048	-1.0668	sp|Q9Y5A6|ZSC21_HUMAN	1.16368	-0.878995	3.20635	-1.56552	1.27758	0.231594	0.327478	-5.65664	1	NA	493100	3131400	6256800	1518800	12567000	2115300	9617200	NA	-3.65897	-0.703571	-2.32889	-2.23699	-0.154344	-2.35464	0.478771	-2.23048	-1.0668	1.16368	0.231594	0.327478
445	sp|P12532|KCRU_HUMAN	sp|P12532|KCRU_HUMAN	4	sp|P12532|KCRU_HUMAN Creatine kinase U-type, mitochondrial OS=Homo sapiens GN=CKMT1A PE=1 SV=1	-1.86454	-0.701817	sp|P12532|KCRU_HUMAN	1.16273	-1.28141	3.60686	-1.16691	1.10864	0.30167	0.401125	-5.6728	3	NA	NA	2069200	6010300	1038400	21647000	NA	6932800	NA	NA	-1.3367	-2.39239	-2.74932	0.612778	NA	0.03109	-1.86454	-0.701817	1.16273	0.30167	0.401125
1525	sp|Q7L2E3|DHX30_HUMAN	sp|Q7L2E3|DHX30_HUMAN	41	sp|Q7L2E3|DHX30_HUMAN Putative ATP-dependent RNA helicase DHX30 OS=Homo sapiens GN=DHX30 PE=1 SV=1	1.35795	2.51938	sp|Q7L2E3|DHX30_HUMAN	1.16143	0.0881597	2.2347	1.93867	2.39438	0.0364838	0.074547	-4.1003	0	4282500	15279000	19381000	63056000	44676000	150380000	48747000	39405000	0.658928	1.36964	2.08189	1.32136	2.31922	3.34711	2.00331	2.40789	1.35795	2.51938	1.16143	0.0364838	0.074547
1623	sp|Q8IX18|DHX40_HUMAN	sp|Q8IX18|DHX40_HUMAN	22	sp|Q8IX18|DHX40_HUMAN Probable ATP-dependent RNA helicase DHX40 OS=Homo sapiens GN=DHX40 PE=1 SV=2	-3.66759	-2.50669	sp|Q8IX18|DHX40_HUMAN	1.1609	-0.956162	3.27796	-3.08714	1.21331	0.251491	0.348719	-5.80509	0	176830	2755000	101360	2965700	445370	3580200	5212700	697960	-4.07688	-1.13925	-5.94584	-3.50841	-3.88992	-1.92568	-1.10189	-3.10928	-3.66759	-2.50669	1.1609	0.251491	0.348719
1953	sp|Q96RR1|PEO1_HUMAN	sp|Q96RR1|PEO1_HUMAN	4	sp|Q96RR1|PEO1_HUMAN Twinkle protein, mitochondrial OS=Homo sapiens GN=PEO1 PE=1 SV=1	-5.68275	-4.52394	sp|Q96RR1|PEO1_HUMAN	1.15881	-0.643355	2.96097	-4.7557	1.4985	0.174626	0.260999	-5.04909	3	NA	NA	NA	748940	296590	888380	346910	188430	NA	NA	NA	-5.68275	-4.43771	-3.89186	-4.86581	-4.90039	-5.68275	-4.52394	1.15881	0.174626	0.260999
88	sp|O00567|NOP56_HUMAN	sp|O00567|NOP56_HUMAN	34	sp|O00567|NOP56_HUMAN Nucleolar protein 56 OS=Homo sapiens GN=NOP56 PE=1 SV=4	3.70277	4.85665	sp|O00567|NOP56_HUMAN	1.15388	-0.0423938	2.35015	4.27971	2.13422	0.0572167	0.105658	-4.52101	0	20296000	75804000	97297000	262940000	489030000	694890000	190690000	179100000	2.97086	3.71539	4.54746	3.57738	5.5435	5.50629	3.89793	4.47888	3.70277	4.85665	1.15388	0.0572167	0.105658
401	sp|P08047|SP1_HUMAN	sp|P08047|SP1_HUMAN	4	sp|P08047|SP1_HUMAN Transcription factor Sp1 OS=Homo sapiens GN=SP1 PE=1 SV=3	-1.23801	-0.0849957	sp|P08047|SP1_HUMAN	1.15302	-0.892392	3.19843	-0.546202	1.31369	0.227486	0.322442	-5.44687	3	NA	NA	5197000	5451400	NA	12394000	7560000	9799100	NA	NA	0.0705722	-2.5466	NA	-0.173899	-0.585489	0.5044	-1.23801	-0.0849957	1.15302	0.227486	0.322442
961	sp|P63244|RACK1_HUMAN	sp|P63244|RACK1_HUMAN	16	sp|P63244|RACK1_HUMAN Receptor of activated protein C kinase 1 OS=Homo sapiens GN=RACK1 PE=1 SV=3	1.83365	2.9852	sp|P63244|RACK1_HUMAN	1.15155	0.220562	2.08254	2.40943	2.73683	0.0200284	0.0460245	-3.52787	0	9287500	18607000	15878000	102560000	82065000	146070000	117280000	35716000	1.80923	1.65824	1.77725	2.08989	3.13853	3.30609	3.22275	2.27344	1.83365	2.9852	1.15155	0.0200284	0.0460245
988	sp|P82650|RT22_HUMAN	sp|P82650|RT22_HUMAN	6	sp|P82650|RT22_HUMAN 28S ribosomal protein S22, mitochondrial OS=Homo sapiens GN=MRPS22 PE=1 SV=1	-2.66756	-1.51747	sp|P82650|RT22_HUMAN	1.15008	-0.82247	3.12264	-2.09251	1.32972	0.218011	0.31296	-5.53154	2	NA	458790	2247200	4020900	6732000	4616500	1586100	NA	NA	-3.76459	-1.21059	-3.02748	-0.230796	-1.56706	-2.75456	NA	-2.66756	-1.51747	1.15008	0.218011	0.31296
2247	sp|Q9NQG5|RPR1B_HUMAN	sp|Q9NQG5|RPR1B_HUMAN	7	sp|Q9NQG5|RPR1B_HUMAN Regulation of nuclear pre-mRNA domain-containing protein 1B OS=Homo sapiens GN=RPRD1B PE=1 SV=1	-1.9208	-0.770976	sp|Q9NQG5|RPR1B_HUMAN	1.14982	-0.199596	2.49924	-1.34589	1.88535	0.0872132	0.147122	-4.90563	0	354670	3075000	1166400	10916000	10446000	5730800	8083400	1969200	-3.04267	-0.97831	-2.21267	-1.44955	0.361174	-1.26204	-0.492506	-1.69053	-1.9208	-0.770976	1.14982	0.0872132	0.147122
1622	sp|Q8IX12|CCAR1_HUMAN	sp|Q8IX12|CCAR1_HUMAN	22	sp|Q8IX12|CCAR1_HUMAN Cell division cycle and apoptosis regulator protein 1 OS=Homo sapiens GN=CCAR1 PE=1 SV=2	1.2993	2.449	sp|Q8IX12|CCAR1_HUMAN	1.1497	-0.102813	2.40221	1.87415	2.031	0.0682356	0.121537	-4.683	0	3661800	15541000	7079500	164200000	49877000	65973000	68736000	47483000	0.426258	1.39454	0.542945	2.83347	2.4676	2.18482	2.48062	2.66297	1.2993	2.449	1.1497	0.0682356	0.121537
1809	sp|Q92878|RAD50_HUMAN	sp|Q92878|RAD50_HUMAN	25	sp|Q92878|RAD50_HUMAN DNA repair protein RAD50 OS=Homo sapiens GN=RAD50 PE=1 SV=1	-0.0953063	1.05071	sp|Q92878|RAD50_HUMAN	1.14602	-0.867516	3.15956	0.477704	1.25934	0.235071	0.331402	-5.75193	0	3997200	1401000	6553000	44398000	30868000	70810000	3903300	21843000	0.556484	-2.12963	0.424852	0.76707	1.82107	2.28463	-1.50369	1.60085	-0.0953063	1.05071	1.14602	0.235071	0.331402
474	sp|P16402|H13_HUMAN	sp|P16402|H13_HUMAN	11	sp|P16402|H13_HUMAN Histone H1.3 OS=Homo sapiens GN=HIST1H1D PE=1 SV=2	0.810402	1.95265	sp|P16402|H13_HUMAN	1.14225	0.13551	2.14898	1.38153	2.51046	0.0297898	0.0631094	-3.90811	0	5207100	8995500	12558000	32612000	40640000	50550000	30399000	41007000	0.949406	0.59378	1.41879	0.279633	2.19164	1.80918	1.34737	2.4624	0.810402	1.95265	1.14225	0.0297898	0.0631094
2572	sp|Q9Y5S2|MRCKB_HUMAN	sp|Q9Y5S2|MRCKB_HUMAN	3	sp|Q9Y5S2|MRCKB_HUMAN Serine/threonine-protein kinase MRCK beta OS=Homo sapiens GN=CDC42BPB PE=1 SV=2	-3.49425	-2.35355	sp|Q9Y5S2|MRCKB_HUMAN	1.1407	-0.592604	2.87401	-2.73379	1.50092	0.169391	0.254626	-5.2665	2	NA	261800	NA	5972800	1937400	4089700	1715700	691620	NA	-4.58623	NA	-2.40228	-1.909	-1.73799	-2.64546	-3.12176	-3.49425	-2.35355	1.1407	0.169391	0.254626
1254	sp|Q15061|WDR43_HUMAN	sp|Q15061|WDR43_HUMAN	18	sp|Q15061|WDR43_HUMAN WD repeat-containing protein 43 OS=Homo sapiens GN=WDR43 PE=1 SV=3	1.73195	2.86838	sp|Q15061|WDR43_HUMAN	1.13643	-0.127059	2.39992	2.30016	1.99012	0.0731302	0.128222	-4.74623	0	7803900	10755000	30142000	83498000	113620000	163480000	41662000	46915000	1.55061	0.855419	2.75674	1.76501	3.5769	3.46494	1.78516	2.64651	1.73195	2.86838	1.13643	0.0731302	0.128222
1946	sp|Q96QZ7|MAGI1_HUMAN	sp|Q96QZ7|MAGI1_HUMAN	3	sp|Q96QZ7|MAGI1_HUMAN Membrane-associated guanylate kinase, WW and PDZ domain-containing protein 1 OS=Homo sapiens GN=MAGI1 PE=1 SV=3	-4.97292	-3.83819	sp|Q96QZ7|MAGI1_HUMAN	1.13473	-0.431521	2.70098	-4.51903	1.68838	0.13209	0.208265	-4.97868	3	118130	279590	115030	NA	362520	NA	921300	NA	-4.67631	-4.48994	-5.75251	NA	-4.16725	NA	-3.50914	NA	-4.97292	-3.83819	1.13473	0.13209	0.208265
1372	sp|Q53FA7|QORX_HUMAN	sp|Q53FA7|QORX_HUMAN	2	sp|Q53FA7|QORX_HUMAN Quinone oxidoreductase PIG3 OS=Homo sapiens GN=TP53I3 PE=1 SV=2	1.09709	2.23128	sp|Q53FA7|QORX_HUMAN	1.13419	-0.749902	3.01828	2.00444	1.40288	0.200437	0.292717	-5.16426	3	NA	NA	10174000	NA	26953000	51680000	77271000	52610000	NA	NA	1.09709	NA	1.63833	1.84036	2.64319	2.80322	1.09709	2.23128	1.13419	0.200437	0.292717
1605	sp|Q8IV63|VRK3_HUMAN	sp|Q8IV63|VRK3_HUMAN	3	sp|Q8IV63|VRK3_HUMAN Inactive serine/threonine-protein kinase VRK3 OS=Homo sapiens GN=VRK3 PE=1 SV=2	-3.01695	-1.88784	sp|Q8IV63|VRK3_HUMAN	1.12912	0.173261	2.08497	-2.4524	2.6137	0.0248606	0.0544259	-3.73545	0	489570	455630	823720	4130000	1882600	4572100	2836600	1485700	-2.5637	-3.77472	-2.74422	-2.98518	-1.94766	-1.58069	-1.94709	-2.07591	-3.01695	-1.88784	1.12912	0.0248606	0.0544259
2179	sp|Q9H8H0|NOL11_HUMAN	sp|Q9H8H0|NOL11_HUMAN	11	sp|Q9H8H0|NOL11_HUMAN Nucleolar protein 11 OS=Homo sapiens GN=NOL11 PE=1 SV=1	-0.916696	0.212224	sp|Q9H8H0|NOL11_HUMAN	1.12892	-0.484923	2.74276	-0.352236	1.54779	0.151142	0.231921	-5.38792	0	578820	2142200	9779600	15645000	13941000	30354000	6901900	5527200	-2.31486	-1.50771	1.03667	-0.880887	0.75005	1.08968	-0.711992	-0.278839	-0.916696	0.212224	1.12892	0.151142	0.231921
2566	sp|Q9Y5J1|UTP18_HUMAN	sp|Q9Y5J1|UTP18_HUMAN	19	sp|Q9Y5J1|UTP18_HUMAN U3 small nucleolar RNA-associated protein 18 homolog OS=Homo sapiens GN=UTP18 PE=1 SV=3	1.49073	2.61863	sp|Q9Y5J1|UTP18_HUMAN	1.1279	-0.11663	2.37243	2.05468	2.00527	0.0712791	0.125508	-4.72286	0	6582900	9726700	34668000	51009000	73798000	117950000	51326000	39169000	1.29779	0.708236	2.97052	0.986379	2.99547	3.00445	2.07492	2.39968	1.49073	2.61863	1.1279	0.0712791	0.125508
10	CON__Q3SX09	CON__Q3SX09	5		-2.21588	-1.08916	CON__Q3SX09	1.12672	-2.6814	4.93485	-1.46473	0.674787	0.51765	0.606581	-6.1053	2	NA	NA	1908900	4165000	14784000	30097000	224140	3801100	NA	NA	-1.45991	-2.97185	0.829157	1.07768	-5.47252	-0.790947	-2.21588	-1.08916	1.12672	0.51765	0.606581
103	sp|O14578|CTRO_HUMAN	sp|O14578|CTRO_HUMAN	8	sp|O14578|CTRO_HUMAN Citron Rho-interacting kinase OS=Homo sapiens GN=CIT PE=1 SV=2	-4.08504	-2.96135	sp|O14578|CTRO_HUMAN	1.12369	-1.71837	3.96575	-3.71047	0.901726	0.39191	0.492759	-5.92528	2	151180	150110	125570	14408000	NA	1000100	NA	1358900	-4.30975	-5.40084	-5.61854	-1.01102	NA	-3.72476	NA	-2.19793	-4.08504	-2.96135	1.12369	0.39191	0.492759
232	sp|O75175|CNOT3_HUMAN	sp|O75175|CNOT3_HUMAN	5	sp|O75175|CNOT3_HUMAN CCR4-NOT transcription complex subunit 3 OS=Homo sapiens GN=CNOT3 PE=1 SV=1	-3.38642	-2.26698	sp|O75175|CNOT3_HUMAN	1.11945	-0.115948	2.35485	-2.8267	2.00496	0.0713165	0.125508	-4.72334	0	308500	1314500	252020	2946200	1638900	4121600	1313100	1367300	-3.24991	-2.22297	-4.55399	-3.51883	-2.13445	-1.72703	-3.01693	-2.1895	-3.38642	-2.26698	1.11945	0.0713165	0.125508
2001	sp|Q99832|TCPH_HUMAN	sp|Q99832|TCPH_HUMAN	20	sp|Q99832|TCPH_HUMAN T-complex protein 1 subunit eta OS=Homo sapiens GN=CCT7 PE=1 SV=2	0.533157	1.65158	sp|Q99832|TCPH_HUMAN	1.11842	-0.711196	2.94804	1.09237	1.35255	0.204489	0.298082	-5.63992	0	8748400	7121700	5531700	27229000	149020000	66464000	13994000	7837700	1.72038	0.251691	0.165947	-0.00538709	3.94234	2.19528	0.269805	0.198899	0.533157	1.65158	1.11842	0.204489	0.298082
20	REV__sp|P16234|PGFRA_HUMAN	REV__sp|P16234|PGFRA_HUMAN	2	sp|P16234|PGFRA_HUMAN Platelet-derived growth factor receptor alpha OS=Homo sapiens GN=PDGFRA PE=1 SV=1	-0.818416	0.299915	REV__sp|P16234|PGFRA_HUMAN	1.11833	-0.596352	2.83301	0.0762493	1.51993	0.169265	0.254599	-5.02273	3	NA	NA	NA	16276000	8499900	22524000	16254000	6628600	NA	NA	NA	-0.818416	0.0833902	0.668802	0.477755	-0.0302853	-0.818416	0.299915	1.11833	0.169265	0.254599
1423	sp|Q5VST9|OBSCN_HUMAN	sp|Q5VST9|OBSCN_HUMAN	2	sp|Q5VST9|OBSCN_HUMAN Obscurin OS=Homo sapiens GN=OBSCN PE=1 SV=3	-1.47517	-0.357516	sp|Q5VST9|OBSCN_HUMAN	1.11765	-1.06367	3.29898	-0.63693	1.22886	0.261469	0.359557	-5.33149	4	1018500	NA	NA	NA	5526200	NA	15926000	3202700	-1.47517	NA	NA	NA	-0.496732	NA	0.449438	-1.02525	-1.47517	-0.357516	1.11765	0.261469	0.359557
126	sp|O15047|SET1A_HUMAN	sp|O15047|SET1A_HUMAN	3	sp|O15047|SET1A_HUMAN Histone-lysine N-methyltransferase SETD1A OS=Homo sapiens GN=SETD1A PE=1 SV=3	-2.7044	-1.58772	sp|O15047|SET1A_HUMAN	1.11669	-0.853433	3.08681	-2.42523	1.35942	0.218987	0.31417	-5.18653	4	NA	990300	626310	6321700	2459100	NA	NA	NA	NA	-2.63774	-3.1629	-2.31258	-1.58772	NA	NA	NA	-2.7044	-1.58772	1.11669	0.218987	0.31417
2002	sp|Q99848|EBP2_HUMAN	sp|Q99848|EBP2_HUMAN	13	sp|Q99848|EBP2_HUMAN Probable rRNA-processing protein EBP2 OS=Homo sapiens GN=EBNA1BP2 PE=1 SV=2	1.78183	2.89776	sp|Q99848|EBP2_HUMAN	1.11593	0.00362414	2.22824	2.33979	2.21984	0.0493821	0.0942132	-4.38433	0	7180500	17464000	31500000	62641000	80660000	134110000	51378000	71031000	1.4269	1.5654	2.82408	1.31093	3.11526	3.18558	2.07633	3.21386	1.78183	2.89776	1.11593	0.0493821	0.0942132
43	REV__sp|Q9UPT6|JIP3_HUMAN	REV__sp|Q9UPT6|JIP3_HUMAN	2	sp|Q9UPT6|JIP3_HUMAN C-Jun-amino-terminal kinase-interacting protein 3 OS=Homo sapiens GN=MAPK8IP3 PE=1 SV=3	-0.443395	0.671629	REV__sp|Q9UPT6|JIP3_HUMAN	1.11502	-1.93222	4.16227	0.22562	0.852736	0.42005	0.520103	-5.91502	3	NA	NA	17386000	4635700	25331000	12951000	17396000	NA	NA	NA	1.91589	-2.80268	1.5547	-0.111884	0.57207	NA	-0.443395	0.671629	1.11502	0.42005	0.520103
2172	sp|Q9H7B2|RPF2_HUMAN	sp|Q9H7B2|RPF2_HUMAN	13	sp|Q9H7B2|RPF2_HUMAN Ribosome production factor 2 homolog OS=Homo sapiens GN=RPF2 PE=1 SV=2	1.45947	2.57399	sp|Q9H7B2|RPF2_HUMAN	1.11453	-0.22941	2.45846	2.01673	1.83493	0.0948506	0.158196	-4.98087	0	4470200	7848300	31254000	91472000	82240000	121830000	46002000	33398000	0.722668	0.393974	2.8121	1.90912	3.1414	3.05011	1.92281	2.18166	1.45947	2.57399	1.11453	0.0948506	0.158196
1016	sp|Q00839|HNRPU_HUMAN	sp|Q00839|HNRPU_HUMAN	47	sp|Q00839|HNRPU_HUMAN Heterogeneous nuclear ribonucleoprotein U OS=Homo sapiens GN=HNRNPU PE=1 SV=6	6.76304	7.87697	sp|Q00839|HNRPU_HUMAN	1.11394	0.100336	2.12754	7.32	2.43166	0.0341877	0.0706503	-4.03883	0	234030000	396120000	744850000	1842200000	2369700000	4726400000	3722400000	1756600000	6.60399	6.13714	7.6578	6.65321	7.6698	8.21082	8.02534	7.60193	6.76304	7.87697	1.11394	0.0341877	0.0706503
1003	sp|P84103|SRSF3_HUMAN	sp|P84103|SRSF3_HUMAN	10	sp|P84103|SRSF3_HUMAN Serine/arginine-rich splicing factor 3 OS=Homo sapiens GN=SRSF3 PE=1 SV=1	3.62328	4.72848	sp|P84103|SRSF3_HUMAN	1.1052	0.154576	2.05582	4.17588	2.57241	0.0267268	0.0576556	-3.80466	0	29453000	62320000	88951000	198100000	258750000	419220000	314070000	233850000	3.52418	3.42853	4.41041	3.13001	4.6858	4.79339	4.591	4.84373	3.62328	4.72848	1.1052	0.0267268	0.0576556
355	sp|P02545|LMNA_HUMAN	sp|P02545|LMNA_HUMAN	28	sp|P02545|LMNA_HUMAN Prelamin-A/C OS=Homo sapiens GN=LMNA PE=1 SV=1	0.587366	1.69118	sp|P02545|LMNA_HUMAN	1.10381	-2.18398	4.3916	1.13927	0.742848	0.473798	0.56904	-6.25478	0	2565500	6247700	62304000	10746000	19047000	169430000	286040000	1187500	-0.102437	0.0599309	3.86631	-1.47435	1.17054	3.51537	4.46115	-2.38235	0.587366	1.69118	1.10381	0.473798	0.56904
2534	sp|Q9Y3C1|NOP16_HUMAN	sp|Q9Y3C1|NOP16_HUMAN	6	sp|Q9Y3C1|NOP16_HUMAN Nucleolar protein 16 OS=Homo sapiens GN=NOP16 PE=1 SV=2	-0.425053	0.677737	sp|Q9Y3C1|NOP16_HUMAN	1.10279	-0.217536	2.42312	0.126342	1.84808	0.0928024	0.155329	-4.96135	0	1155100	3647600	10961000	15508000	19529000	29268000	12470000	8809700	-1.28816	-0.728215	1.21094	-0.894784	1.20421	1.03828	0.109648	0.358811	-0.425053	0.677737	1.10279	0.0928024	0.155329
1250	sp|Q15050|RRS1_HUMAN	sp|Q15050|RRS1_HUMAN	18	sp|Q15050|RRS1_HUMAN Ribosome biogenesis regulatory protein homolog OS=Homo sapiens GN=RRS1 PE=1 SV=2	1.46974	2.57207	sp|Q15050|RRS1_HUMAN	1.10233	-0.257083	2.46174	2.02091	1.79419	0.101465	0.166522	-5.04091	0	4387500	15512000	32617000	48753000	73235000	145850000	31197000	45874000	0.694921	1.39181	2.87733	0.914909	2.98515	3.30396	1.38337	2.61581	1.46974	2.57207	1.10233	0.101465	0.166522
1781	sp|Q92560|BAP1_HUMAN	sp|Q92560|BAP1_HUMAN	3	sp|Q92560|BAP1_HUMAN Ubiquitin carboxyl-terminal hydrolase BAP1 OS=Homo sapiens GN=BAP1 PE=1 SV=2	-4.05512	-2.95627	sp|Q92560|BAP1_HUMAN	1.09885	-1.24303	3.44073	-3.23099	1.12535	0.300008	0.399784	-5.4401	4	NA	NA	NA	2098200	1939400	1026000	1092400	NA	NA	NA	NA	-4.05512	-1.90761	-3.68869	-3.27252	NA	-4.05512	-2.95627	1.09885	0.300008	0.399784
1470	sp|Q6P1J9|CDC73_HUMAN	sp|Q6P1J9|CDC73_HUMAN	28	sp|Q6P1J9|CDC73_HUMAN Parafibromin OS=Homo sapiens GN=CDC73 PE=1 SV=1	1.18776	2.2847	sp|Q6P1J9|CDC73_HUMAN	1.09694	-0.0313791	2.22525	1.73623	2.1511	0.055584	0.103274	-4.49422	0	3892100	23435000	7620600	74392000	35945000	46215000	102060000	39184000	0.516891	1.99611	0.655493	1.58257	2.02623	1.6827	3.02968	2.4002	1.18776	2.2847	1.09694	0.055584	0.103274
299	sp|O95104|SFR15_HUMAN	sp|O95104|SFR15_HUMAN	9	sp|O95104|SFR15_HUMAN Splicing factor, arginine/serine-rich 15 OS=Homo sapiens GN=SCAF4 PE=1 SV=3	-0.262209	0.83252	sp|O95104|SFR15_HUMAN	1.09473	-0.0662469	2.2557	0.285156	2.08637	0.0620965	0.113515	-4.59649	0	2171400	7498500	2059300	33419000	7891500	31620000	28046000	13712000	-0.350262	0.327198	-1.34402	0.318253	-0.0166777	1.14732	1.23547	0.96397	-0.262209	0.83252	1.09473	0.0620965	0.113515
2236	sp|Q9NPJ6|MED4_HUMAN	sp|Q9NPJ6|MED4_HUMAN	4	sp|Q9NPJ6|MED4_HUMAN Mediator of RNA polymerase II transcription subunit 4 OS=Homo sapiens GN=MED4 PE=1 SV=1	-2.74364	-1.65484	sp|Q9NPJ6|MED4_HUMAN	1.0888	-0.361746	2.53935	-2.01777	1.71189	0.122866	0.195394	-4.98726	2	NA	1292800	NA	3515000	3236000	2526200	5311400	1679600	NA	-2.24735	NA	-3.23993	-1.2178	-2.41759	-1.07583	-1.90811	-2.74364	-1.65484	1.0888	0.122866	0.195394
1092	sp|Q12849|GRSF1_HUMAN	sp|Q12849|GRSF1_HUMAN	7	sp|Q12849|GRSF1_HUMAN G-rich sequence factor 1 OS=Homo sapiens GN=GRSF1 PE=1 SV=3	-1.59165	-0.51249	sp|Q12849|GRSF1_HUMAN	1.07916	-0.0671489	2.22546	-1.05207	2.08302	0.0624533	0.113903	-4.60177	0	394150	2397000	3244700	10651000	6350700	9146400	7055600	4853400	-2.88584	-1.34311	-0.649258	-1.48837	-0.309359	-0.60254	-0.681399	-0.456661	-1.59165	-0.51249	1.07916	0.0624533	0.113903
1924	sp|Q96KR1|ZFR_HUMAN	sp|Q96KR1|ZFR_HUMAN	36	sp|Q96KR1|ZFR_HUMAN Zinc finger RNA-binding protein OS=Homo sapiens GN=ZFR PE=1 SV=2	2.35344	3.42814	sp|Q96KR1|ZFR_HUMAN	1.0747	-0.227269	2.37667	2.89079	1.8264	0.0962029	0.159774	-4.99351	0	8683000	13724000	31238000	280720000	135650000	203250000	86734000	76824000	1.70923	1.21244	2.81132	3.68076	3.81568	3.77211	2.80366	3.3211	2.35344	3.42814	1.0747	0.0962029	0.159774
791	sp|P51587|BRCA2_HUMAN	sp|P51587|BRCA2_HUMAN	9	sp|P51587|BRCA2_HUMAN Breast cancer type 2 susceptibility protein OS=Homo sapiens GN=BRCA2 PE=1 SV=3	-3.34662	-2.27347	sp|P51587|BRCA2_HUMAN	1.07314	-1.0516	3.19789	-2.81004	1.11753	0.288581	0.388506	-5.91085	0	47454	507990	1202200	10095000	4155000	900990	2977800	1120900	-6.03151	-3.6154	-2.16647	-1.57308	-0.880991	-3.87198	-1.87961	-2.4613	-3.34662	-2.27347	1.07314	0.288581	0.388506
155	sp|O43172|PRP4_HUMAN	sp|O43172|PRP4_HUMAN	19	sp|O43172|PRP4_HUMAN U4/U6 small nuclear ribonucleoprotein Prp4 OS=Homo sapiens GN=PRPF4 PE=1 SV=2	1.08688	2.15663	sp|O43172|PRP4_HUMAN	1.06975	-0.339276	2.47879	1.62175	1.67986	0.122329	0.194934	-5.20555	0	3012300	8703800	13714000	104040000	77370000	42117000	98966000	14377000	0.136129	0.545501	1.55335	2.11253	3.05915	1.55171	2.98692	1.02875	1.08688	2.15663	1.06975	0.122329	0.194934
346	sp|O96008|TOM40_HUMAN	sp|O96008|TOM40_HUMAN	3	sp|O96008|TOM40_HUMAN Mitochondrial import receptor subunit TOM40 homolog OS=Homo sapiens GN=TOMM40 PE=1 SV=1	-4.39814	-3.33245	sp|O96008|TOM40_HUMAN	1.06569	-0.466639	2.59801	-3.86529	1.58613	0.148964	0.229475	-5.20869	2	97328	NA	538120	1280400	NA	1497900	1744500	309840	-4.96413	NA	-3.39481	-4.83547	NA	-3.15489	-2.62234	-4.22012	-4.39814	-3.33245	1.06569	0.148964	0.229475
768	sp|P49959|MRE11_HUMAN	sp|P49959|MRE11_HUMAN	31	sp|P49959|MRE11_HUMAN Double-strand break repair protein MRE11A OS=Homo sapiens GN=MRE11A PE=1 SV=3	3.95205	5.01522	sp|P49959|MRE11_HUMAN	1.06317	-0.276262	2.4026	4.48364	1.75627	0.107998	0.175413	-5.09617	0	39178000	33463000	65360000	834870000	225720000	740920000	388100000	277400000	3.94815	2.5178	3.93949	5.40278	4.50179	5.59678	4.88498	5.07733	3.95205	5.01522	1.06317	0.107998	0.175413
2080	sp|Q9BYG3|MK67I_HUMAN	sp|Q9BYG3|MK67I_HUMAN	18	sp|Q9BYG3|MK67I_HUMAN MKI67 FHA domain-interacting nucleolar phosphoprotein OS=Homo sapiens GN=NIFK PE=1 SV=1	1.53038	2.58924	sp|Q9BYG3|MK67I_HUMAN	1.05885	-0.430568	2.54828	2.05981	1.57299	0.145221	0.224882	-5.35381	0	3186200	9445500	35002000	113610000	63377000	141180000	36131000	49549000	0.219527	0.665271	2.98517	2.25156	2.79035	3.25806	1.58731	2.72123	1.53038	2.58924	1.05885	0.145221	0.224882
1384	sp|Q5EBL8|PDZ11_HUMAN	sp|Q5EBL8|PDZ11_HUMAN	2	sp|Q5EBL8|PDZ11_HUMAN PDZ domain-containing protein 11 OS=Homo sapiens GN=PDZD11 PE=1 SV=2	-4.37597	-3.32145	sp|Q5EBL8|PDZ11_HUMAN	1.05452	-1.57282	3.68187	-3.84871	0.915373	0.385099	0.487834	-5.96876	2	NA	562650	677850	413790	149540	3404300	1763600	NA	NA	-3.46573	-3.04205	-6.62014	-5.36038	-1.99675	-2.60721	NA	-4.37597	-3.32145	1.05452	0.385099	0.487834
799	sp|P51946|CCNH_HUMAN	sp|P51946|CCNH_HUMAN	3	sp|P51946|CCNH_HUMAN Cyclin-H OS=Homo sapiens GN=CCNH PE=1 SV=1	-3.14371	-2.09642	sp|P51946|CCNH_HUMAN	1.04728	-0.425921	2.52049	-2.79461	1.62129	0.141201	0.220103	-5.10949	2	536930	690000	650620	2349000	NA	2051400	3966000	NA	-2.42649	-3.16691	-3.10471	-3.87673	NA	-2.71129	-1.48156	NA	-3.14371	-2.09642	1.04728	0.141201	0.220103
1231	sp|Q14966|ZN638_HUMAN	sp|Q14966|ZN638_HUMAN	37	sp|Q14966|ZN638_HUMAN Zinc finger protein 638 OS=Homo sapiens GN=ZNF638 PE=1 SV=2	2.58494	3.62766	sp|Q14966|ZN638_HUMAN	1.04272	-0.0231837	2.10863	3.1063	2.1645	0.0543186	0.101498	-4.47288	0	8025000	32735000	30282000	250090000	133430000	176020000	134470000	103990000	1.59213	2.48559	2.76382	3.49822	3.79345	3.5692	3.41274	3.73525	2.58494	3.62766	1.04272	0.0543186	0.101498
85	sp|O00541|PESC_HUMAN	sp|O00541|PESC_HUMAN	17	sp|O00541|PESC_HUMAN Pescadillo homolog OS=Homo sapiens GN=PES1 PE=1 SV=1	1.08207	2.11954	sp|O00541|PESC_HUMAN	1.03747	-0.405274	2.48021	1.60081	1.59109	0.141097	0.220084	-5.32911	0	2064100	8680800	13155000	153060000	53530000	79321000	39106000	24779000	-0.425566	0.541626	1.48976	2.72247	2.56283	2.44475	1.69722	1.77336	1.08207	2.11954	1.03747	0.141097	0.220084
1425	sp|Q5VT52|RPRD2_HUMAN	sp|Q5VT52|RPRD2_HUMAN	30	sp|Q5VT52|RPRD2_HUMAN Regulation of nuclear pre-mRNA domain-containing protein 2 OS=Homo sapiens GN=RPRD2 PE=1 SV=1	1.73832	2.77451	sp|Q5VT52|RPRD2_HUMAN	1.03619	-0.00231597	2.07469	2.25641	2.2077	0.0504272	0.0957304	-4.40383	0	6922100	37168000	10197000	85839000	81268000	87999000	94996000	40678000	1.37244	2.67159	1.10054	1.8087	3.12538	2.59121	2.93005	2.45138	1.73832	2.77451	1.03619	0.0504272	0.0957304
1871	sp|Q96EA4|SPDLY_HUMAN	sp|Q96EA4|SPDLY_HUMAN	26	sp|Q96EA4|SPDLY_HUMAN Protein Spindly OS=Homo sapiens GN=SPDL1 PE=1 SV=2	2.56362	3.5992	sp|Q96EA4|SPDLY_HUMAN	1.03558	0.0688635	2.00229	3.08141	2.37025	0.0380496	0.077013	-4.13995	0	15411000	28765000	25282000	172180000	71411000	222350000	232020000	79993000	2.56172	2.29624	2.48806	2.90845	2.95116	3.89881	4.17042	3.37639	2.56362	3.5992	1.03558	0.0380496	0.077013
1742	sp|Q8TEU7|RPGF6_HUMAN	sp|Q8TEU7|RPGF6_HUMAN	5	sp|Q8TEU7|RPGF6_HUMAN Rap guanine nucleotide exchange factor 6 OS=Homo sapiens GN=RAPGEF6 PE=1 SV=2	-4.58313	-3.55442	sp|Q8TEU7|RPGF6_HUMAN	1.02872	-1.417	3.47443	-4.06878	0.959287	0.363768	0.466572	-5.9283	2	NA	258310	88089	4135100	204180	688490	3996100	NA	NA	-4.60589	-6.16028	-2.98323	-4.94075	-4.25145	-1.47106	NA	-4.58313	-3.55442	1.02872	0.363768	0.466572
430	sp|P11142|HSP7C_HUMAN	sp|P11142|HSP7C_HUMAN	48	sp|P11142|HSP7C_HUMAN Heat shock cognate 71 kDa protein OS=Homo sapiens GN=HSPA8 PE=1 SV=1	7.36546	8.39341	sp|P11142|HSP7C_HUMAN	1.02795	0.0436006	2.01231	7.87944	2.31064	0.0422025	0.0832064	-4.2374	0	380780000	567300000	749140000	3818400000	4995100000	7041600000	4023900000	2336900000	7.3273	6.66317	7.66657	7.80479	8.67454	8.77322	8.13352	7.99237	7.36546	8.39341	1.02795	0.0422025	0.0832064
509	sp|P20248|CCNA2_HUMAN	sp|P20248|CCNA2_HUMAN	7	sp|P20248|CCNA2_HUMAN Cyclin-A2 OS=Homo sapiens GN=CCNA2 PE=1 SV=2	-2.41768	-1.39089	sp|P20248|CCNA2_HUMAN	1.02679	-0.627932	2.68151	-1.90429	1.37298	0.198248	0.290236	-5.61463	0	411140	387390	825750	25731000	2080500	8083200	3452400	2620800	-2.82313	-4.01234	-2.74046	-0.0947904	-1.81298	-0.776862	-1.6742	-1.29953	-2.41768	-1.39089	1.02679	0.198248	0.290236
2381	sp|Q9UFC0|LRWD1_HUMAN	sp|Q9UFC0|LRWD1_HUMAN	13	sp|Q9UFC0|LRWD1_HUMAN Leucine-rich repeat and WD repeat-containing protein 1 OS=Homo sapiens GN=LRWD1 PE=1 SV=2	-1.40292	-0.393018	sp|Q9UFC0|LRWD1_HUMAN	1.0099	-0.130325	2.15013	-0.89797	1.95973	0.0769802	0.133557	-4.79287	0	666410	2184600	1533000	23588000	8933200	12012000	5990700	4384200	-2.10547	-1.479	-1.79503	-0.23218	0.150383	-0.218062	-0.90866	-0.595733	-1.40292	-0.393018	1.0099	0.0769802	0.133557
324	sp|O95639|CPSF4_HUMAN	sp|O95639|CPSF4_HUMAN	7	sp|O95639|CPSF4_HUMAN Cleavage and polyadenylation specificity factor subunit 4 OS=Homo sapiens GN=CPSF4 PE=1 SV=1	-1.92451	-0.923421	sp|O95639|CPSF4_HUMAN	1.00109	-0.87118	2.87336	-1.42397	1.18308	0.262765	0.360538	-5.83918	0	518600	1798200	1588900	9224400	5242500	938980	13110000	9829300	-2.4781	-1.76408	-1.7403	-1.71557	-0.567742	-3.81372	0.179168	0.50861	-1.92451	-0.923421	1.00109	0.262765	0.360538
1619	sp|Q8IWZ3|ANKH1_HUMAN	sp|Q8IWZ3|ANKH1_HUMAN	55	sp|Q8IWZ3|ANKH1_HUMAN Ankyrin repeat and KH domain-containing protein 1 OS=Homo sapiens GN=ANKHD1 PE=1 SV=1	2.89921	3.89684	sp|Q8IWZ3|ANKH1_HUMAN	0.997628	-0.0345196	2.02978	3.39803	2.13863	0.0567855	0.105109	-4.51401	0	12117000	49709000	30886000	250540000	173720000	334750000	136080000	89706000	2.2044	3.09739	2.794	3.50106	4.14898	4.47597	3.42927	3.53314	2.89921	3.89684	0.997628	0.0567855	0.105109
97	sp|O14519|CDKA1_HUMAN;sp|O75956|CDKA2_HUMAN	sp|O14519|CDKA1_HUMAN	4	sp|O14519|CDKA1_HUMAN Cyclin-dependent kinase 2-associated protein 1 OS=Homo sapiens GN=CDK2AP1 PE=1 SV=1;sp|O75956|CDKA2_HUMAN Cyclin-dependent kinase 2-associated protein 2 OS=Homo sapiens GN=CDK2AP2 PE=1 SV=1	-1.86648	-0.876516	sp|O14519|CDKA1_HUMAN	0.989961	-0.219059	2.19898	-1.3715	1.81173	0.098568	0.162707	-5.01515	0	371320	1966500	1900500	11323000	9102300	7653100	4128400	2431800	-2.9745	-1.63304	-1.46665	-1.39171	0.175649	-0.853994	-1.42581	-1.40191	-1.86648	-0.876516	0.989961	0.098568	0.162707
1754	sp|Q8WUM0|NU133_HUMAN	sp|Q8WUM0|NU133_HUMAN	17	sp|Q8WUM0|NU133_HUMAN Nuclear pore complex protein Nup133 OS=Homo sapiens GN=NUP133 PE=1 SV=2	-0.733351	0.256275	sp|Q8WUM0|NU133_HUMAN	0.989626	-0.136931	2.11618	-0.238538	1.94369	0.079088	0.13614	-4.81737	0	1030400	5947100	2704300	19467000	13096000	15458000	21682000	4193900	-1.45791	-0.0122862	-0.927649	-0.535558	0.665801	0.137742	0.877989	-0.656433	-0.733351	0.256275	0.989626	0.079088	0.13614
1784	sp|Q92576|PHF3_HUMAN	sp|Q92576|PHF3_HUMAN	41	sp|Q92576|PHF3_HUMAN PHD finger protein 3 OS=Homo sapiens GN=PHF3 PE=1 SV=3	2.33386	3.32241	sp|Q92576|PHF3_HUMAN	0.988552	0.0668063	1.9103	2.82813	2.373	0.0378679	0.0767108	-4.13544	0	13021000	22029000	21415000	169560000	80415000	124750000	138890000	96803000	2.31132	1.90549	2.23439	2.88422	3.11116	3.08352	3.45766	3.63729	2.33386	3.32241	0.988552	0.0378679	0.0767108
494	sp|P18085|ARF4_HUMAN	sp|P18085|ARF4_HUMAN	8	sp|P18085|ARF4_HUMAN ADP-ribosylation factor 4 OS=Homo sapiens GN=ARF4 PE=1 SV=3	-2.83915	-1.8508	sp|P18085|ARF4_HUMAN	0.988349	-0.650899	2.6276	-2.34498	1.33406	0.21028	0.303927	-5.6626	0	192410	1581800	1005700	4055000	3307600	6904300	4945700	353260	-3.95141	-1.95187	-2.43919	-3.01414	-1.18832	-0.999248	-1.17492	-4.04073	-2.83915	-1.8508	0.988349	0.21028	0.303927
2451	sp|Q9ULW3|ABT1_HUMAN	sp|Q9ULW3|ABT1_HUMAN	5	sp|Q9ULW3|ABT1_HUMAN Activator of basal transcription 1 OS=Homo sapiens GN=ABT1 PE=1 SV=1	-2.759	-1.77436	sp|Q9ULW3|ABT1_HUMAN	0.984649	-0.424757	2.39405	-2.19635	1.56676	0.14969	0.230443	-5.29294	1	NA	901970	885740	4444700	6693100	3896800	1871500	1067600	NA	-2.77457	-2.63329	-2.86916	-0.238604	-1.80615	-2.52473	-2.52794	-2.759	-1.77436	0.984649	0.14969	0.230443
2281	sp|Q9NUP9|LIN7C_HUMAN	sp|Q9NUP9|LIN7C_HUMAN	3	sp|Q9NUP9|LIN7C_HUMAN Protein lin-7 homolog C OS=Homo sapiens GN=LIN7C PE=1 SV=1	-4.14323	-3.15875	sp|Q9NUP9|LIN7C_HUMAN	0.984476	-0.480077	2.44903	-3.55254	1.56653	0.158123	0.240756	-5.13745	3	NA	NA	359930	1823200	882380	965640	NA	918740	NA	NA	-4.00937	-4.27708	-2.96869	-3.77422	NA	-2.73334	-4.14323	-3.15875	0.984476	0.158123	0.240756
316	sp|O95478|NSA2_HUMAN	sp|O95478|NSA2_HUMAN	7	sp|O95478|NSA2_HUMAN Ribosome biogenesis protein NSA2 homolog OS=Homo sapiens GN=NSA2 PE=1 SV=1	0.60264	1.58654	sp|O95478|NSA2_HUMAN	0.983896	-0.134756	2.10255	1.09459	1.94609	0.0787692	0.135789	-4.81371	0	2342000	6884100	12276000	53522000	42104000	45509000	31536000	14575000	-0.237877	0.201995	1.38408	1.06236	2.23933	1.66098	1.39838	1.04746	0.60264	1.58654	0.983896	0.0787692	0.135789
293	sp|O94916|NFAT5_HUMAN	sp|O94916|NFAT5_HUMAN	4	sp|O94916|NFAT5_HUMAN Nuclear factor of activated T-cells 5 OS=Homo sapiens GN=NFAT5 PE=1 SV=1	-3.86553	-2.88552	sp|O94916|NFAT5_HUMAN	0.980004	-1.03987	2.99988	-3.37553	1.16364	0.28523	0.385756	-5.52814	4	NA	NA	589360	1608300	1567300	1111000	NA	NA	NA	NA	-3.25582	-4.47523	-2.19464	-3.57641	NA	NA	-3.86553	-2.88552	0.980004	0.28523	0.385756
1931	sp|Q96MX3|ZNF48_HUMAN	sp|Q96MX3|ZNF48_HUMAN	3	sp|Q96MX3|ZNF48_HUMAN Zinc finger protein 48 OS=Homo sapiens GN=ZNF48 PE=1 SV=2	-6.67585	-5.70252	sp|Q96MX3|ZNF48_HUMAN	0.97333	-0.996609	2.94327	-6.09185	1.15145	0.284726	0.385294	-5.62777	3	NA	36827	104930	NA	102210	123160	433850	NA	NA	-7.45875	-5.89295	NA	-5.87311	-6.67926	-4.55518	NA	-6.67585	-5.70252	0.97333	0.284726	0.385294
461	sp|P14866|HNRPL_HUMAN	sp|P14866|HNRPL_HUMAN	30	sp|P14866|HNRPL_HUMAN Heterogeneous nuclear ribonucleoprotein L OS=Homo sapiens GN=HNRNPL PE=1 SV=2	4.91424	5.88634	sp|P14866|HNRPL_HUMAN	0.972102	0.0221175	1.92209	5.40029	2.26414	0.0457429	0.0889236	-4.31288	0	48712000	153360000	161550000	790010000	644400000	1093200000	820020000	394950000	4.2718	4.74737	5.32228	5.31551	5.91524	6.14549	5.92405	5.56059	4.91424	5.88634	0.972102	0.0457429	0.0889236
833	sp|P54132|BLM_HUMAN	sp|P54132|BLM_HUMAN	33	sp|P54132|BLM_HUMAN Bloom syndrome protein OS=Homo sapiens GN=BLM PE=1 SV=1	1.31033	2.28018	sp|P54132|BLM_HUMAN	0.969846	-0.404476	2.34417	1.79525	1.56143	0.147911	0.228299	-5.3695	0	2144100	11976000	18941000	137290000	49025000	69077000	46086000	42190000	-0.369063	1.01291	2.0468	2.55068	2.44438	2.24968	1.92534	2.50131	1.31033	2.28018	0.969846	0.147911	0.228299
1286	sp|Q15545|TAF7_HUMAN	sp|Q15545|TAF7_HUMAN	3	sp|Q15545|TAF7_HUMAN Transcription initiation factor TFIID subunit 7 OS=Homo sapiens GN=TAF7 PE=1 SV=1	-5.42804	-4.46012	sp|Q15545|TAF7_HUMAN	0.967915	-1.05122	2.98705	-4.94408	1.09328	0.304131	0.403683	-5.79572	2	NA	77282	69252	3210700	NA	765010	611020	151580	NA	-6.37317	-6.52794	-3.383	NA	-4.10278	-4.07954	-5.19805	-5.42804	-4.46012	0.967915	0.304131	0.403683
640	sp|P35637|FUS_HUMAN	sp|P35637|FUS_HUMAN	12	sp|P35637|FUS_HUMAN RNA-binding protein FUS OS=Homo sapiens GN=FUS PE=1 SV=1	3.32615	4.29221	sp|P35637|FUS_HUMAN	0.966066	-0.0849542	2.01709	3.80918	2.03378	0.0679144	0.121056	-4.67868	0	29664000	41569000	65114000	182520000	100980000	364460000	282430000	212290000	3.53479	2.83548	3.93373	3.00059	3.41799	4.59593	4.44351	4.71143	3.32615	4.29221	0.966066	0.0679144	0.121056
2209	sp|Q9HCE1|MOV10_HUMAN	sp|Q9HCE1|MOV10_HUMAN	16	sp|Q9HCE1|MOV10_HUMAN Putative helicase MOV-10 OS=Homo sapiens GN=MOV10 PE=1 SV=2	3.40902	4.37497	sp|Q9HCE1|MOV10_HUMAN	0.965949	-4.87432	6.80622	3.89199	0.365957	0.721633	0.784817	-6.47172	0	3573200000	51441000	5570900	21997000	3716700000	6418900000	12017000	9931700	10.6543	3.14755	0.176738	-0.342512	8.27622	8.64261	0.05825	0.522786	3.40902	4.37497	0.965949	0.721633	0.784817
1649	sp|Q8N3U4|STAG2_HUMAN	sp|Q8N3U4|STAG2_HUMAN	8	sp|Q8N3U4|STAG2_HUMAN Cohesin subunit SA-2 OS=Homo sapiens GN=STAG2 PE=1 SV=3	-2.5015	-1.53778	sp|Q8N3U4|STAG2_HUMAN	0.963719	-0.177203	2.10464	-2.01964	1.86897	0.0896299	0.150553	-4.93018	0	323010	1742600	1604900	3406800	2848000	3119900	4956500	2314500	-3.18161	-1.81007	-1.72499	-3.28933	-1.38989	-2.11982	-1.17189	-1.46953	-2.5015	-1.53778	0.963719	0.0896299	0.150553
1241	sp|Q15014|MO4L2_HUMAN	sp|Q15014|MO4L2_HUMAN	4	sp|Q15014|MO4L2_HUMAN Mortality factor 4-like protein 2 OS=Homo sapiens GN=MORF4L2 PE=1 SV=1	-2.33102	-1.37265	sp|Q15014|MO4L2_HUMAN	0.958365	-0.645007	2.56174	-1.69211	1.36319	0.207657	0.301211	-5.43751	2	NA	1513800	NA	5119600	1562300	3550900	10216000	2845300	NA	-2.01622	NA	-2.64581	-2.19894	-1.93728	-0.16728	-1.1871	-2.33102	-1.37265	0.958365	0.207657	0.301211
2296	sp|Q9NVP1|DDX18_HUMAN	sp|Q9NVP1|DDX18_HUMAN	21	sp|Q9NVP1|DDX18_HUMAN ATP-dependent RNA helicase DDX18 OS=Homo sapiens GN=DDX18 PE=1 SV=2	2.0219	2.97557	sp|Q9NVP1|DDX18_HUMAN	0.95367	-0.259088	2.16643	2.49873	1.73993	0.110927	0.1798	-5.11978	0	5938900	17868000	37858000	112700000	111100000	165270000	75775000	35347000	1.14481	1.59889	3.10504	2.23885	3.54668	3.4803	2.61604	2.25924	2.0219	2.97557	0.95367	0.110927	0.1798
2310	sp|Q9NX24|NHP2_HUMAN	sp|Q9NX24|NHP2_HUMAN	2	sp|Q9NX24|NHP2_HUMAN H/ACA ribonucleoprotein complex subunit 2 OS=Homo sapiens GN=NHP2 PE=1 SV=1	-0.0686837	0.884089	sp|Q9NX24|NHP2_HUMAN	0.952772	-0.688364	2.59391	0.475758	1.30197	0.223469	0.318278	-5.62787	1	NA	5732300	8519300	14827000	36640000	26637000	6737800	17845000	NA	-0.0661629	0.825845	-0.965733	2.05204	0.905403	-0.745416	1.32433	-0.0686837	0.884089	0.952772	0.223469	0.318278
2440	sp|Q9ULH7|MKL2_HUMAN	sp|Q9ULH7|MKL2_HUMAN	4	sp|Q9ULH7|MKL2_HUMAN MKL/myocardin-like protein 2 OS=Homo sapiens GN=MKL2 PE=1 SV=3	-0.889465	0.0556807	sp|Q9ULH7|MKL2_HUMAN	0.945146	-1.34422	3.23451	-0.484403	0.925849	0.377339	0.479806	-6.02544	1	1069100	10053000	1269900	16172000	21289000	36113000	1921400	NA	-1.40312	0.756561	-2.08276	-0.828544	1.32047	1.33475	-2.48818	NA	-0.889465	0.0556807	0.945146	0.377339	0.479806
878	sp|P61106|RAB14_HUMAN	sp|P61106|RAB14_HUMAN	4	sp|P61106|RAB14_HUMAN Ras-related protein Rab-14 OS=Homo sapiens GN=RAB14 PE=1 SV=4	-4.18704	-3.24298	sp|P61106|RAB14_HUMAN	0.944065	-0.214442	2.10257	-3.78244	1.82751	0.0989983	0.163154	-4.92921	1	169000	232800	561250	1568000	716720	1095900	1444600	NA	-4.14418	-4.75817	-3.3305	-4.51533	-3.24886	-3.59572	-2.88436	NA	-4.18704	-3.24298	0.944065	0.0989983	0.163154
747	sp|P49458|SRP09_HUMAN	sp|P49458|SRP09_HUMAN	3	sp|P49458|SRP09_HUMAN Signal recognition particle 9 kDa protein OS=Homo sapiens GN=SRP9 PE=1 SV=2	-0.266595	0.676522	sp|P49458|SRP09_HUMAN	0.943117	-0.177462	2.0637	0.204963	1.86222	0.0906438	0.151823	-4.94027	0	1576500	3026300	7996600	27885000	13230000	29338000	22009000	7217500	-0.826004	-1.00169	0.729089	0.0322257	0.679518	1.04165	0.898781	0.0861387	-0.266595	0.676522	0.943117	0.0906438	0.151823
954	sp|P63104|1433Z_HUMAN	sp|P63104|1433Z_HUMAN	12	sp|P63104|1433Z_HUMAN 14-3-3 protein zeta/delta OS=Homo sapiens GN=YWHAZ PE=1 SV=1	0.770609	1.71255	sp|P63104|1433Z_HUMAN	0.941937	-0.160683	2.04456	1.24158	1.89019	0.0865119	0.146252	-4.89837	0	4370000	9650200	8110900	49722000	36911000	33192000	83642000	12335000	0.688982	0.696672	0.750776	0.946004	2.06197	1.21576	2.75324	0.81921	0.770609	1.71255	0.941937	0.0865119	0.146252
279	sp|O76021|RL1D1_HUMAN	sp|O76021|RL1D1_HUMAN	30	sp|O76021|RL1D1_HUMAN Ribosomal L1 domain-containing protein 1 OS=Homo sapiens GN=RSL1D1 PE=1 SV=3	4.20138	5.13874	sp|O76021|RL1D1_HUMAN	0.937358	-0.106774	1.98149	4.67006	1.98636	0.0735967	0.128658	-4.75202	0	45167000	84827000	141200000	275200000	409860000	763010000	352450000	236660000	4.15952	3.8801	5.11654	3.64938	5.30554	5.63822	4.75114	4.86007	4.20138	5.13874	0.937358	0.0735967	0.128658
519	sp|P22087|FBRL_HUMAN	sp|P22087|FBRL_HUMAN	17	sp|P22087|FBRL_HUMAN rRNA 2-O-methyltransferase fibrillarin OS=Homo sapiens GN=FBL PE=1 SV=2	3.97774	4.91258	sp|P22087|FBRL_HUMAN	0.934844	-0.1262	1.99589	4.44516	1.94946	0.0783236	0.13512	-4.80857	0	37615000	61001000	110800000	318460000	379220000	712050000	250450000	200340000	3.88765	3.3972	4.74605	3.88005	5.20085	5.54071	4.27659	4.63218	3.97774	4.91258	0.934844	0.0783236	0.13512
2369	sp|Q9UBD5|ORC3_HUMAN	sp|Q9UBD5|ORC3_HUMAN	2	sp|Q9UBD5|ORC3_HUMAN Origin recognition complex subunit 3 OS=Homo sapiens GN=ORC3 PE=1 SV=1	-5.20059	-4.26729	sp|Q9UBD5|ORC3_HUMAN	0.933307	-1.02853	2.89514	-4.96727	1.14098	0.293902	0.393648	-5.42409	4	NA	124390	189740	1200000	NA	NA	533770	NA	NA	-5.6761	-4.98775	-4.93793	NA	NA	-4.26729	NA	-5.20059	-4.26729	0.933307	0.293902	0.393648
557	sp|P26599|PTBP1_HUMAN	sp|P26599|PTBP1_HUMAN	23	sp|P26599|PTBP1_HUMAN Polypyrimidine tract-binding protein 1 OS=Homo sapiens GN=PTBP1 PE=1 SV=1	2.97307	3.90612	sp|P26599|PTBP1_HUMAN	0.933054	-0.160177	2.02629	3.4396	1.88844	0.0867643	0.146574	-4.90099	0	12973000	32971000	62453000	209760000	135240000	268280000	266330000	74943000	2.30583	2.49611	3.86996	3.22037	3.8116	4.16371	4.36198	3.28719	2.97307	3.90612	0.933054	0.0867643	0.146574
1259	sp|Q15185|TEBP_HUMAN	sp|Q15185|TEBP_HUMAN	2	sp|Q15185|TEBP_HUMAN Prostaglandin E synthase 3 OS=Homo sapiens GN=PTGES3 PE=1 SV=1	-3.03874	-2.10708	sp|Q15185|TEBP_HUMAN	0.931656	-0.448778	2.31209	-2.72819	1.53922	0.159919	0.242863	-5.21726	2	306980	1038400	406350	5595300	NA	3559000	2231900	NA	-3.25725	-2.56827	-3.82401	-2.50543	NA	-1.93406	-2.28011	NA	-3.03874	-2.10708	0.931656	0.159919	0.242863
50	sp|A6NHQ2|FBLL1_HUMAN	sp|A6NHQ2|FBLL1_HUMAN	2	sp|A6NHQ2|FBLL1_HUMAN rRNA/tRNA 2-O-methyltransferase fibrillarin-like protein 1 OS=Homo sapiens GN=FBLL1 PE=3 SV=2	1.58357	2.51459	sp|A6NHQ2|FBLL1_HUMAN	0.931019	-0.173817	2.03585	2.04908	1.86453	0.0902961	0.151456	-4.93683	0	11681000	11140000	21491000	52690000	69547000	82795000	41663000	54537000	2.14995	0.90693	2.23981	1.03761	2.91553	2.50522	1.7852	2.85243	1.58357	2.51459	0.931019	0.0902961	0.151456
1085	sp|Q12789|TF3C1_HUMAN	sp|Q12789|TF3C1_HUMAN	13	sp|Q12789|TF3C1_HUMAN General transcription factor 3C polypeptide 1 OS=Homo sapiens GN=GTF3C1 PE=1 SV=4	-2.59548	-1.67289	sp|Q12789|TF3C1_HUMAN	0.922597	-1.62537	3.47057	-2.13418	0.801174	0.44071	0.537895	-6.20912	0	1055200	3020000	140220	5597900	12138000	4054900	475060	3086500	-1.42257	-1.00474	-5.44992	-2.5047	0.563446	-1.75004	-4.42914	-1.0758	-2.59548	-1.67289	0.922597	0.44071	0.537895
178	sp|O43670|ZN207_HUMAN	sp|O43670|ZN207_HUMAN	8	sp|O43670|ZN207_HUMAN BUB3-interacting and GLEBS motif-containing protein ZNF207 OS=Homo sapiens GN=ZNF207 PE=1 SV=1	0.8702	1.78886	sp|O43670|ZN207_HUMAN	0.918661	-1.04186	2.87918	1.32953	1.0368	0.323022	0.42375	-5.99468	0	1797900	9096300	14577000	88382000	4157000	85621000	66152000	63281000	-0.630735	0.6101	1.64661	1.85482	-0.880342	2.55256	2.42739	3.05583	0.8702	1.78886	0.918661	0.323022	0.42375
2301	sp|Q9NW13|RBM28_HUMAN	sp|Q9NW13|RBM28_HUMAN	25	sp|Q9NW13|RBM28_HUMAN RNA-binding protein 28 OS=Homo sapiens GN=RBM28 PE=1 SV=3	1.95433	2.86662	sp|Q9NW13|RBM28_HUMAN	0.912289	-0.383849	2.20843	2.41047	1.55736	0.148868	0.229475	-5.375	0	7605400	17655000	39887000	72361000	104660000	165940000	37269000	55804000	1.51233	1.58133	3.18481	1.53883	3.46622	3.48601	1.63039	2.88384	1.95433	2.86662	0.912289	0.148868	0.229475
708	sp|P46087|NOP2_HUMAN	sp|P46087|NOP2_HUMAN	30	sp|P46087|NOP2_HUMAN Probable 28S rRNA (cytosine(4447)-C(5))-methyltransferase OS=Homo sapiens GN=NOP2 PE=1 SV=2	3.28216	4.19097	sp|P46087|NOP2_HUMAN	0.908808	-0.224592	2.04221	3.73657	1.77418	0.104866	0.170915	-5.07015	0	15683000	63817000	86031000	152650000	259920000	314430000	161160000	128070000	2.58772	3.46329	4.35941	2.71824	4.69188	4.38763	3.66423	4.02015	3.28216	4.19097	0.908808	0.104866	0.170915
2309	sp|Q9NX08|COMD8_HUMAN	sp|Q9NX08|COMD8_HUMAN	4	sp|Q9NX08|COMD8_HUMAN COMM domain-containing protein 8 OS=Homo sapiens GN=COMMD8 PE=1 SV=1	-2.79232	-1.88479	sp|Q9NX08|COMD8_HUMAN	0.907525	-1.3652	3.18025	-2.33855	0.883527	0.396648	0.497126	-6.13951	0	303030	278840	4765400	3305600	6870600	8194900	1479100	444410	-3.27649	-4.49388	-0.0619152	-3.33697	-0.203338	-0.757501	-2.85157	-3.72675	-2.79232	-1.88479	0.907525	0.396648	0.497126
2008	sp|Q9BPU6|DPYL5_HUMAN	sp|Q9BPU6|DPYL5_HUMAN	29	sp|Q9BPU6|DPYL5_HUMAN Dihydropyrimidinase-related protein 5 OS=Homo sapiens GN=DPYSL5 PE=1 SV=1	5.49796	6.39452	sp|Q9BPU6|DPYL5_HUMAN	0.896559	-0.0906019	1.88372	5.94624	2.00955	0.0707642	0.12508	-4.71624	0	136040000	159440000	252410000	825770000	738980000	1283500000	987130000	1070700000	5.79788	4.80431	6.00419	5.38546	6.09976	6.37188	6.18168	6.92475	5.49796	6.39452	0.896559	0.0707642	0.12508
362	sp|P04637|P53_HUMAN	sp|P04637|P53_HUMAN	17	sp|P04637|P53_HUMAN Cellular tumor antigen p53 OS=Homo sapiens GN=TP53 PE=1 SV=4	2.50989	3.40612	sp|P04637|P53_HUMAN	0.896226	-0.120131	1.91258	2.95801	1.9511	0.0781074	0.134887	-4.80606	0	11595000	37142000	33413000	118330000	173060000	190640000	88875000	59057000	2.13897	2.67057	2.91418	2.31587	4.14385	3.68176	2.83753	2.96134	2.50989	3.40612	0.896226	0.0781074	0.134887
1000	sp|P84085|ARF5_HUMAN	sp|P84085|ARF5_HUMAN	8	sp|P84085|ARF5_HUMAN ADP-ribosylation factor 5 OS=Homo sapiens GN=ARF5 PE=1 SV=2	-2.69263	-1.79752	sp|P84085|ARF5_HUMAN	0.895114	-0.342082	2.13231	-2.18114	1.62254	0.137206	0.21544	-5.21765	1	NA	1136500	1308900	2789300	1994600	3226800	5249300	1401400	NA	-2.43606	-2.03653	-3.60529	-1.8698	-2.07229	-1.09217	-2.15581	-2.69263	-1.79752	0.895114	0.137206	0.21544
1041	sp|Q03252|LMNB2_HUMAN	sp|Q03252|LMNB2_HUMAN	33	sp|Q03252|LMNB2_HUMAN Lamin-B2 OS=Homo sapiens GN=LMNB2 PE=1 SV=4	0.753021	1.6438	sp|Q03252|LMNB2_HUMAN	0.890779	-2.70816	4.48972	1.19841	0.547651	0.595333	0.67892	-6.38453	0	1954100	3327500	108280000	22184000	13943000	242330000	271000000	1026700	-0.506942	-0.862732	4.71089	-0.329137	0.750243	4.0202	4.38613	-2.58137	0.753021	1.6438	0.890779	0.595333	0.67892
1028	sp|Q01844|EWS_HUMAN	sp|Q01844|EWS_HUMAN	5	sp|Q01844|EWS_HUMAN RNA-binding protein EWS OS=Homo sapiens GN=EWSR1 PE=1 SV=1	1.24379	2.12809	sp|Q01844|EWS_HUMAN	0.884306	-1.09643	2.86504	1.68594	0.987837	0.345357	0.44758	-6.04304	0	1705200	9130200	68512000	53359000	19883000	47504000	108630000	40522000	-0.709396	0.615548	4.01146	1.05754	1.22841	1.7215	3.11633	2.44613	1.24379	2.12809	0.884306	0.345357	0.44758
[truncated: 1,671 more rows]

## Sheet: Table S2B - NBirAP3F vs Control
	ProteinName	TopProteinName	nrPeptides	Fasta.headers	Control	NBir	proteinID	log2FC	CI.L	CI.R	AveExpr	t	P.Value	adj.P.Val	B	nrNAs	002_S186542_HEK293T_BirA_Empty_Biotin_4_E.raw	007_S184702_HEK293T_BirA_Empty_Biotin_E.raw	012_S186541_HEK293T_BirA_Empty_Biotin_3_E.raw	014_S186540_HEK293T_BirA_Empty_Biotin_2_E.raw	003_S186537_HEK293T_NBirA_P3F_Biotin_2_N.raw	008_S184703_HEK293T_NBirA_P3F_Biotin_N.raw	011_S186539_HEK293T_NBirA_P3F_Biotin_4_N.raw	016_S186538_HEK293T_NBirA_P3F_Biotin_3_N.raw	002_S186542_HEK293T_BirA_Empty_Biotin_4_E.transformed	007_S184702_HEK293T_BirA_Empty_Biotin_E.transformed	012_S186541_HEK293T_BirA_Empty_Biotin_3_E.transformed	014_S186540_HEK293T_BirA_Empty_Biotin_2_E.transformed	003_S186537_HEK293T_NBirA_P3F_Biotin_2_N.transformed	008_S184703_HEK293T_NBirA_P3F_Biotin_N.transformed	011_S186539_HEK293T_NBirA_P3F_Biotin_4_N.transformed	016_S186538_HEK293T_NBirA_P3F_Biotin_3_N.transformed	pseudo.Control	pseudo.NBir	pseudo.log2FC	pseudo.P.Value	pseudo.adj.P.Val
[truncated: 2,595 more rows]
