# Supplementary material for: BAF complexes drive proliferation and block myogenic differentiation in fusion-positive rhabdomyosarcoma
Source: Research Square preprint supplement (doi:10.21203/rs.3.rs-131009/v1), 2021-01-07
Supplement: Supplementary file 6 [file 9c32a3dbda7b43c4505ab4da.xlsx]

## Sheet: Sheet1
TARGET	Screen	RH4 Fold Depletion	RH30 Fold Depletion	RD Fold Depletion	CTR Fold Depletion
ABTB1_BTB105178	Reader	-0.4253	0.185649	-0.04113	-0.20887
ABTB1_BTB273376	Reader	0.372836	0.525624	0.039166	0.069997
ABTB2_BTB837947	Reader	-0.36192	0.279721	-0.45918	0.079333
ACAT1_AT	Catalytic	0.416838	-0.32242	0.597284	0.349344
ACTR_AT	Catalytic	-0.17679	-0.98982	-0.14532	0.420908
AIRE_Phd1	Reader	-0.06229	0.402664	0.469541	0.225041
AIRE_Phd2	Reader	0.494288	-0.18244	0.616805	-0.26198
AKAP1_tudor764809	Reader	-0.50011	-0.32459	0.071402	-0.61174
ALG13_Tudor	Reader	-0.20886	0.542391	0.371198	0.711055
ANKFY1_BTB111198	Reader	0.239348	-0.38767	0.586189	-0.14288
ARID4A_Chromo	Reader	-0.58843	0.038142	-0.33911	-0.53532
ARID4A_tudor58113	Reader	-0.53721	-0.1777	0.283815	-0.12218
ARID4B_Chromo	Reader	0.438586	0.484166	0.742475	-0.05921
ARID4B_tudor58113	Reader	-0.18518	-2.35682	0.362668	-0.34121
ASH1L_Bah26602794	Reader	-0.50756	0.116048	-0.77944	-0.2472
ASH1L_BD	Catalytic	-0.60944	0.786836	0.472139	0.007145
ASH1L_Phd	Reader	-0.67339	-0.11818	0.307821	-0.26934
ASH1L_SET	Catalytic	-0.19854	0.187617	-0.34014	-0.32111
ATAD2_BD	Catalytic	-0.24098	-0.03752	-0.13932	-0.05933
ATAD2B_BD	Catalytic	-0.37103	-0.39542	0.215002	-0.01105
ATAT1_AT	Catalytic	-0.12019	-0.06838	0.122222	0.384715
ATF2_AT	Catalytic	-0.23569	-1.10207	0.066671	0.313291
ATRX_ADD167270	Reader	-0.59666	-1.05943	-0.66484	0.414861
ATRX_ATPase	Catalytic	-0.59668	-0.76978	-0.14386	-0.10093
BACH1_BTB24127	Reader	0.363052	0.323959	0.473666	0.412624
BACH2_BTB27133	Reader	0.085151	0.036191	0.520126	0.399197
BAHCC1_BAHCC1	Reader	-0.29598	-0.54467	0.468196	-0.29325
BAHD1_Bah623733	Reader	-0.15344	0.117708	0.332037	0.402808
BAZ1A_BD	Catalytic	0.006577	0.101439	0.451117	0.195899
BAZ1A_Phd	Reader	-0.34313	-0.1645	-0.01605	0.250741
BAZ1B_BD	Catalytic	-0.86781	-1.9246	-0.16697	0.36528
BAZ1B_Phd	Reader	-1.29696	-1.36265	-1.4264	0.281493
BAZ2A_BD	Catalytic	-0.79623	-0.30696	-0.21409	0.187904
BAZ2A_MBD	Reader	-0.81719	-0.73368	-0.57722	-0.00078
BAZ2A_Phd	Reader	-1.12324	-0.40727	-0.00516	-0.61283
BAZ2B_BD	Catalytic	0.331819	-0.40325	-0.13395	0.321445
BAZ2B_MBD	Reader	-0.39765	-0.37247	-0.1062	-0.15722
BAZ2B_Phd	Reader	-0.08176	0.062794	0.164134	-0.16902
BCL6_BTB22128	Reader	-0.18377	0.488569	-0.12352	0.108005
BCL6B_BTB28134	Reader	-0.68658	-1.84663	-0.06793	-0.41468
BDP1_SANT	Reader	-5.0236	-4.97507	-5.32297	-3.81923
BPTF_BD	Catalytic	-1.28994	-0.45335	-0.4022	-0.42153
BPTF_Phd1	Reader	-1.52248	-2.72487	-0.53675	-1.24526
BPTF_Phd2	Reader	-1.20669	-0.86803	-5.14951	-1.00328
BRD1_BD	Catalytic	-0.34646	0.575894	-0.87792	-0.78854
BRD1_ePhd	Reader	-0.99305	-0.49854	0.009225	-0.14437
BRD1_Phd	Reader	-1.6119	-1.78148	-0.47052	-0.1494
BRD1_PWWP	Reader	-0.15864	-0.22059	0.127681	-0.14777
BRD2_BD1	Catalytic	0.176611	-0.34723	0.020779	0.520047
BRD2_BD2	Catalytic	-0.05801	-0.0857	0.554117	0.142548
BRD3_BD1	Catalytic	-0.31193	0.211987	-0.49697	0.123344
BRD3_BD2	Catalytic	-0.65895	-2.22809	-0.56921	0.355437
BRD4_BD1	Catalytic	-6.41002	-5.19321	-3.22857	-4.41657
BRD4_BD2	Catalytic	-1.93484	-0.97465	-0.47473	-2.32641
BRD8_BD	Catalytic	-1.54129	-1.14088	-0.07047	-1.07036
BRD9_BD	Catalytic	-1.18558	-0.21312	-0.81019	-0.47127
BRDT_BD1	Catalytic	0.231798	-0.67765	-0.51293	0.265412
BRDT_BD2	Catalytic	-0.42238	-2.26265	0.419938	0.188903
BRPF1_BD	Catalytic	-0.27138	-0.94676	-0.9739	-0.5246
BRPF1_ePhd	Reader	-1.1571	-2.39217	-2.72527	-0.7595
BRPF1_Phd	Reader	-0.65851	-1.53232	-4.04419	-0.98962
BRPF1_PWWP10891204	Reader	0.289038	-0.22955	-0.35778	0.130183
BRPF3_BD	Catalytic	-0.10862	-0.50693	0.496749	0.360795
BRPF3_ePhd	Reader	0.078454	0.132909	-0.03905	0.025792
BRPF3_Phd	Reader	-0.01071	-0.43942	0.19388	0.223686
BRPF3_PWWP10741189	Reader	-0.18906	-0.64325	-0.77273	0.006922
BRWD1_BD1	Catalytic	-0.17122	1.31171	0.475383	0.476577
BRWD1_BD2	Catalytic	0.276047	0.653784	0.11121	0.823336
BRWD3_BD1	Catalytic	-0.03961	0.321297	0.646832	0.711744
BRWD3_BD2	Catalytic	0.06715	0.495273	0.544237	0.580879
BTBD1_BTB62175	Reader	-0.9176	-1.24827	0.35329	-0.1917
BTBD11_BTB9151022	Reader	-0.25274	0.120643	-0.09984	0.196456
BTBD17_BTB53162	Reader	0.226008	-0.19555	-1.08897	-0.08165
BTBD18_BTB24120	Reader	-0.41827	0.377651	-0.29207	0.121105
BTBD19_BTB30123	Reader	-0.64424	-0.89715	-0.17227	0.059583
BTBD2_BTB110217	Reader	-0.60252	-0.88413	-0.05917	0.494601
BTBD3_BTB156263	Reader	0.643908	0.671305	0.243431	0.811436
BTBD6_BTB76183	Reader	0.266172	-1.32954	0.363823	0.207453
BTBD7_BTB137235	Reader	0.365317	0.418619	0.140074	-0.06562
BTBD7_BTB268397	Reader	0.113288	0.042713	0.39419	0.355929
BTBD8_BTB207300	Reader	0.523866	-0.58851	0.103404	0.126675
BTBD8_BTB48121	Reader	-0.01977	-0.90878	0.562054	0.263154
BTBD9_BTB33137	Reader	-1.03715	0.047118	-0.44712	-0.39827
C17orf49_SANT	Reader	0.598025	-0.4764	-0.17167	-0.03201
CARM1_RMT	Catalytic	-0.73449	-0.06652	-1.67686	-0.77278
CBX1_Chromo	Reader	0.043115	-0.3302	-0.39711	-0.87751
CBX2_Chromo	Reader	-0.3703	0.292993	-1.97837	-0.74679
CBX3_Chromo	Reader	0.047089	-0.41564	-0.05467	0.010782
CBX4_Chromo	Reader	0.191059	0.180051	-0.09556	-0.2403
CBX5_Chromo	Reader	-0.78459	-0.116	-0.11289	-0.66604
CBX6_Chromo	Reader	0.061214	-0.0545	-0.18577	-0.17395
CBX7_Chromo	Reader	-0.17485	0.326943	-1.01355	-0.15869
CBX8_Chromo	Reader	-0.31519	-0.20489	0.226765	-0.27228
CCDC79_SANT	Reader	0.01272	-0.58978	0.522577	0.12124
CCIN_BTB18128	Reader	-0.16162	-0.38952	0.406894	-0.04528
CDC5L_SANT	Reader	-5.69791	-5.23744	-8.45593	-7.62979
CDC5L_SANT2	Reader	-5.1416	-5.6145	-6.27348	-5.14289
CDK1_e5.1	Reader	-5.71981	-1.70116	-2.70371	-1.53114
CDK1_e6.1	Reader	-9.6257	-9.91923	-10.6158	-9.92511
CDK1_e7.1	Reader	-3.2988	-9.58162	-8.84309	-3.28417
CDK1_positive	Catalytic	-7.39345	-7.49723	-6.92507	-7.31896
CDK9_e2.1	Reader	-4.97555	-2.83215	-9.33595	-8.94726
CDK9_e3.1	Reader	-3.86465	-9.84235	-10.3421	-9.95242
CDK9_e4.2	Reader	-5.46855	-9.48588	-10.7663	-5.69658
CDK9_e5.1	Reader	-5.13659	-9.01137	-3.28395	-9.3623
CDK9_positive	Catalytic	-6.13819	-6.39448	-5.37338	-3.70295
CDY2A_Chromo	Reader	-0.0354	-0.11059	0.527067	-0.18494
CDYL_Chromo	Reader	-1.12546	-0.12021	0.435098	0.32283
CDYL2_Chromo	Reader	-0.18886	0.106965	0.583687	-0.62761
CECR2_BD	Catalytic	-0.32402	0.601512	-0.0465	0.061002
CHD1_ATPase	Catalytic	-0.41799	0.341764	-0.28132	-1.03202
CHD1_Chromo	Reader	-1.33134	-0.00536	-0.69172	-0.26262
CHD1L_ATPase	Catalytic	-0.33458	-0.17312	0.269369	0.058998
CHD1L_Macro716866	Reader	0.035791	-0.2288	-0.23794	0.33514
CHD2_ATPase	Catalytic	-1.09447	-0.084	-0.05965	-0.63214
CHD2_Chromo	Reader	-0.49545	-1.43966	0.146983	-0.62378
CHD3_ATPase	Catalytic	-0.08204	-0.45433	0.068394	0.398815
CHD3_Chromo	Reader	-0.21882	-1.48063	-0.09668	0.410619
CHD3_Phd	Reader	-0.52958	0.122775	0.132169	0.120674
CHD4_ATPase	Catalytic	-7.97982	-6.05573	-5.00776	-5.40615
CHD4_Chromo	Reader	-7.13361	-6.74197	-6.21905	-4.32526
CHD4_Phd	Reader	-4.41505	-2.70814	-2.79431	-1.2007
CHD5_ATPase	Catalytic	-0.17118	1.20871	0.354701	0.563916
CHD5_Chromo	Reader	-0.48076	0.055065	-0.5645	-0.04822
CHD5_Phd	Reader	-0.2383	-0.26672	0.197087	-0.16413
CHD6_ATPase	Catalytic	-0.44836	-2.05256	-0.26986	0.185245
CHD6_Chromo	Reader	-0.24163	-0.69381	-0.31645	-0.39151
CHD6_SANT	Reader	-0.33313	-0.60793	0.232363	0.327993
CHD7_ATPase	Catalytic	-0.38265	0.075632	0.429792	0.741208
CHD7_Chromo	Reader	-1.12064	0.311815	0.419384	0.652054
CHD7_SANT	Reader	0.124986	0.371038	0.428134	0.416772
CHD8_ATPase	Catalytic	-1.30334	0.018138	-0.25151	-1.01469
CHD8_Chromo	Reader	-0.74045	-0.98669	-1.8222	-1.07589
CHD9_ATPase	Catalytic	0.126439	-0.03914	0.838622	0.136314
CHD9_Chromo	Reader	0.462833	0.19272	0.375197	0.075438
CLOCK_AT	Catalytic	-0.3609	0.372015	0.468058	0.479142
CRAMP1_SANT	Reader	-0.32762	-4.3098	-1.48225	0.187972
CREBBP_AT	Catalytic	-1.8482	0.662162	0.878535	-0.29546
CREBBP_BD	Catalytic	-2.4837	-1.24221	0.494912	-0.57243
CXXC1_CXXC162208	Reader	-0.95012	-1.3445	-0.81656	-0.69166
CXXC1_Phd	Reader	-0.94956	-1.13771	-2.03966	-0.31828
CXXC4_CXXC301341	Reader	0.56858	0.278444	0.237901	0.289054
CXXC5_CXXC255296	Reader	-0.33891	0.330693	0.950528	0.11203
DIDO1_Phd	Reader	-1.23291	-5.24874	-0.99132	-1.24082
DMAP1_SANT	Reader	-7.38702	-8.03602	-7.16657	-7.07584
DMTF1_SANT	Reader	-0.22174	0.469573	0.113467	0.481871
DMTF1_SANT2	Reader	0.01902	-0.34886	-0.25856	0.355159
DMTF1_SANT3	Reader	-0.27838	-0.46012	-0.7608	0.177643
DNAJC1_SANT	Reader	0.206197	-0.32256	0.080199	0.07651
DNAJC1_SANT2	Reader	0.115272	0.315491	0.199012	0.156366
DNAJC2_SANT	Reader	-1.56527	0.652757	-0.25169	-0.02665
DNAJC2_SANT2	Reader	-0.91585	0.164134	0.102193	0.140162
DNMT1_Bah770893	Reader	-3.72588	-4.1059	-4.54351	-1.81613
DNMT1_Bah9811117	Reader	-5.15664	-3.99598	-5.80634	-4.03471
DNMT1_CXXC661707	Reader	-2.92472	-1.10835	-3.11377	-0.9355
DNMT3A_PWWP	Reader	0.227998	-0.28384	-0.54951	0.083987
DNMT3B_ADD431550	Reader	-0.1362	-0.56243	0.55197	-0.05449
DNMT3B_PWWP223309	Reader	-0.20323	-1.13286	-0.41477	0.298792
DOT1L_SET	Catalytic	-0.94184	-0.58058	-0.54257	-0.98022
DPF1_Phd1	Reader	-0.28136	-0.61825	0.443382	0.064297
DPF1_Phd2	Reader	-1.45564	0.547183	0.603277	0.326949
DPF2_Phd1	Reader	-0.52958	-0.03092	-1.32635	-0.74791
DPF2_Phd2	Reader	-0.08557	-0.16356	-1.50735	-0.93548
DPF3_Phd	Reader	-0.13455	0.398385	0.136471	0.065575
EHMT1_SET	Catalytic	-3.17964	-0.42798	-2.40821	-0.18188
EHMT2_SET	Catalytic	-3.82756	-1.28513	-1.54805	-0.70302
ELMSAN1_SANT	Reader	-0.57206	-0.61079	0.822403	0.152511
ELP3_AT	Catalytic	-8.62829	-3.58609	-8.86843	-5.51419
ENC1_BTB36144	Reader	0.20067	-0.0494	1.04273	0.409818
EP300_AT	Catalytic	-0.5229	-1.43212	-5.8034	-1.19161
EP300_BD	Catalytic	-1.16014	-0.35302	-5.01519	-1.24407
EP400_ATPase	Catalytic	-4.3038	-1.00189	-0.30124	-2.08202
ERCC6_ATPase	Catalytic	-0.1308	-0.18101	0.208138	0.013176
EZH1_SANT	Reader	0.240524	-0.2699	-1.37508	-0.30669
EZH1_SET	Catalytic	0.326051	-0.34392	-0.15427	-0.18399
EZH2_SANT	Reader	0.55704	0.358544	-0.49981	0.879334
EZH2_SANT2	Reader	0.427138	-0.03135	-0.15706	0.628093
EZH2_SET	Catalytic	0.004371	0.066161	-0.25821	0.205999
FBXL19_CXXC5077	Reader	-1.22248	-0.85795	-1.55239	-0.68464
FBXL19_Phd	Reader	-1.25198	-0.76031	-0.13345	-0.62091
FMR1_Agenet59117	Reader	0.602183	0.469947	0.63264	0.032625
FXR1_Agenet59115	Reader	-0.27502	-0.03157	-0.05201	-0.32953
FXR2_Agenet69127	Reader	-0.50239	-0.74971	0.042676	-0.49024
G2E3_ePhd	Reader	-0.37771	0.37858	0.446576	-0.33376
G2E3_Phd	Reader	0.83611	-0.0902	0.029899	-0.25793
GAN_BTB20125	Reader	-0.44762	-0.13079	-1.37389	0.172966
GCN5_AT	Catalytic	-0.53786	-1.07762	-2.35767	-0.84491
GDAP2_Macro54193	Reader	0.183103	-1.11412	0.250414	0.105733
GLYR1_PWWP690	Reader	-0.27954	0.271292	0.300281	-0.39755
GMCL1_BTB101207	Reader	-1.35164	-0.32688	0.065586	-0.4749
GON4L_SANT	Reader	-1.39664	-0.82486	-0.29055	-0.43732
GTF3C4_AT	Catalytic	-2.82016	-4.74505	-2.20022	-2.63132
GZF1_BTB21133	Reader	-0.28793	-0.38074	-0.36064	0.0884
H2AFY_Macro178364	Reader	-0.25506	-0.14932	0.236595	-0.17622
H2AFY2_Macro178364	Reader	0.032211	-0.20554	0.529334	-0.00719
HAT1_AT	Catalytic	-0.46456	0.487685	0.038918	-0.12054
HBO1_AT	Catalytic	-1.46369	-0.2877	-0.79722	-0.94808
HDAC1_HDAC	Catalytic	-1.06949	0.668619	-1.0426	-0.01546
HDAC10_HDAC	Catalytic	-0.01011	1.17803	0.406725	-0.00683
HDAC11_HDAC	Catalytic	0.347098	0.323036	0.320184	0.417325
HDAC2_HDAC	Catalytic	-0.83887	-0.33275	0.270206	-0.30389
HDAC3_HDAC	Catalytic	-3.74698	-0.91869	-6.39687	-5.32381
HDAC4_HDAC	Catalytic	0.470861	-0.81732	-0.48716	0.503369
HDAC5_HDAC	Catalytic	-0.2299	-1.25909	-0.7767	0.198953
HDAC6_HDAC	Catalytic	-0.25513	0.290322	-0.33939	0.064933
HDAC7_HDAC	Catalytic	-0.12975	0.151437	-0.60168	-0.80522
HDAC8_HDAC	Catalytic	-1.00658	0.260886	0.271833	0.60737
HDAC9_HDAC	Catalytic	0.37042	-0.05079	0.570438	0.592898
HDGF_PWWP40108	Reader	-1.13864	-0.63775	-0.55452	-0.57894
HDGFL1_PWWP985	Reader	-0.1199	0.266968	0.142837	0.417826
HELLS_ATPase	Catalytic	0.342583	1.01877	-0.3514	0.062948
HIC1_BTB37152	Reader	-0.59029	-0.50275	-0.24442	-0.26292
HIC2_BTB40141	Reader	-0.00322	-0.66912	-0.05113	0.370241
HIF1AN_hydroxylase	Catalytic	0.329018	-0.68646	-0.30545	-0.18156
HLTF_ATPase	Catalytic	-0.4336	0.315325	0.007336	0.403871
HR_hydroxylase	Catalytic	-0.07486	-0.7581	-0.16384	0.157536
HSPBAP1_hydroxylase	Catalytic	0.006325	0.077461	0.004924	0.258412
IBTK_BTB554639	Reader	-0.5416	-0.26086	0.292634	0.354834
IBTK_BTB761871	Reader	-0.2042	-0.35443	0.062097	-0.15453
ING1_Phd	Reader	-0.01568	-0.18863	0.55571	0.636782
ING2_Phd	Reader	0.21735	-1.61729	0.37835	0.215501
ING3_Phd	Reader	-2.99993	-4.91767	-0.56641	-1.24279
ING4_Phd	Reader	0.025416	0.223879	-0.05348	0.084987
ING5_Phd	Reader	-0.10903	-0.28337	-1.79283	-0.46435
INO80_ATPase	Catalytic	-5.49336	-3.10649	-5.2522	-3.95571
INTS12_Phd	Reader	-0.42532	-4.34728	-0.79933	-2.50855
IPP_BTB28134	Reader	0.093899	-1.09629	-0.98935	-0.44395
IVNS1ABP_BTB22126	Reader	-0.03082	0.638951	0.475195	-0.27375
JADE1_ePhd	Reader	-0.83297	0.441879	0.742815	0.43865
JADE1_Phd	Reader	0.094025	-0.29551	0.427473	0.360679
JADE2_Phd	Reader	-0.35643	0.686656	1.23457	0.522685
JADE3_ePhd	Reader	0.011258	0.125681	0.14735	0.391983
JADE3_Phd	Reader	0.280702	-0.17083	0.42543	0.346292
JARID2_hydroxylase	Catalytic	0.610934	-0.13374	0.490684	0.47269
JMJD1C_hydroxylase	Catalytic	-0.05503	-0.49385	0.730023	-0.68907
JMJD4_hydroxylase	Catalytic	-0.28787	0.383852	0.578579	0.041872
JMJD6_hydroxylase	Catalytic	-1.45285	-0.04786	-0.81885	-1.37573
JMJD7_hydroxylase	Catalytic	0.213207	0.609062	0.684046	0.152756
JMJD8_hydroxylase	Catalytic	-0.31247	0.688975	0.369881	-0.33036
KAT2A_BD	Catalytic	-2.06569	-0.20774	-0.8111	-0.36927
KAT2B_BD	Catalytic	0.280953	-0.38731	0.64169	0.46405
KAT5_Chromo	Reader	-3.18934	-5.48198	-4.17616	-2.1132
KAT6A_Phd	Reader	-0.22933	-1.72074	-2.02948	-0.22511
KAT6B_Phd1	Reader	0.078246	0.06197	-0.25972	-0.22195
KAT6B_Phd2	Reader	-0.11214	0.192406	-0.47315	0.150337
KAT8_Chromo	Reader	-4.6403	-6.32402	-6.96647	-5.20971
KBTBD11_BTB141225	Reader	0.012713	0.349525	0.912163	0.200378
KBTBD12_BTB32127	Reader	0.997831	0.177945	0.12312	0.268159
KBTBD13_BTB13101	Reader	-0.33494	0.573368	0.789903	-0.08664
KBTBD2_BTB21128	Reader	-1.4845	-0.08585	-0.09125	-0.08817
KBTBD3_BTB42149	Reader	0.431631	-0.042	0.276703	0.195358
KBTBD4_BTB62156	Reader	-0.37172	-0.39803	0.122942	0.021413
KBTBD6_BTB53168	Reader	-0.28495	0.294705	-0.21147	0.200861
KBTBD7_BTB53168	Reader	0.698104	0.064112	0.200228	-0.05561
KBTBD8_BTB39147	Reader	-2.2036	0.566368	-0.33516	-0.02298
KCNA1_BTB39130	Reader	-0.0589	-0.44792	-0.00771	-0.09086
KCNA10_BTB88179	Reader	-0.32059	-3.21877	-0.48278	0.413308
KCNA2_BTB35126	Reader	-0.50657	-0.69249	-0.26296	0.414049
KCNA3_BTB106197	Reader	-0.8348	-3.24579	-1.20447	0.108379
KCNA4_BTB178269	Reader	-0.93234	-0.04907	0.207851	0.270575
KCNA5_BTB122213	Reader	-0.19211	0.095949	0.034512	-0.06433
KCNA6_BTB43134	Reader	-0.10414	0.802833	-0.21409	0.44302
KCNB1_BTB33132	Reader	-0.06853	-0.26875	0.291017	-0.00348
KCNB2_BTB37136	Reader	0.325717	0.218101	0.22839	0.487174
KCNC1_BTB10104	Reader	-0.27105	0.09144	-0.24798	0.510958
KCNC2_BTB10151	Reader	-1.11892	-1.79553	-0.87899	0.198588
KCNC3_BTB90184	Reader	-0.57321	0.462945	0.962352	-0.12577
KCNC4_BTB38143	Reader	-1.2834	-0.82406	0.190845	0.179756
KCND1_BTB42131	Reader	-0.24368	0.3372	-0.27582	0.107659
KCND2_BTB43132	Reader	-0.68186	-0.33485	-0.0795	0.329758
KCND3_BTB42131	Reader	-0.65012	-1.60725	0.154503	0.516509
KCNG1_BTB65164	Reader	-0.69156	-0.13496	0.233495	0.61216
KCNG2_BTB19112	Reader	0.764624	-0.26265	0.525229	0.147718
KCNG3_BTB11111	Reader	0.410045	-0.84247	0.156202	-0.01588
KCNG4_BTB61160	Reader	-0.31706	0.10132	0.412569	0.264672
KCNRG_BTB795	Reader	-0.22047	-0.01552	0.082717	-0.23527
KCNS1_BTB52151	Reader	0.393441	-1.06721	-0.67618	-0.01055
KCNS2_BTB19118	Reader	-0.11981	0.484807	-0.08907	0.202413
KCNS3_BTB17116	Reader	-0.24898	-0.15292	-0.02383	0.073507
KCNV1_BTB42150	Reader	0.01169	-1.26196	-0.67987	0.394625
KCNV2_BTB99190	Reader	-0.60933	0.092574	0.468889	0.436476
KCTD1_BTB40132	Reader	-0.29206	-0.54605	-0.79993	-0.2683
KCTD10_BTB34124	Reader	-1.20616	-4.57582	-4.00965	-0.6904
KCTD11_BTB2270	Reader	-0.44505	-0.65477	-1.9473	-0.43025
KCTD12_BTB36126	Reader	-0.0269	-0.39127	0.498405	0.145289
KCTD13_BTB43133	Reader	-0.16554	-0.55132	-0.12358	-0.21203
KCTD14_BTB35119	Reader	0.282624	-0.91081	-0.17835	0.27552
KCTD15_BTB58145	Reader	-0.02237	0.371975	-0.01527	0.3334
KCTD16_BTB27119	Reader	-0.61666	-0.07486	0.060649	0.066509
KCTD17_BTB33121	Reader	-0.16952	-0.56606	-0.92769	0.096014
KCTD18_BTB1498	Reader	-0.12936	0.445379	0.032876	-0.18485
KCTD19_BTB1872	Reader	-0.67917	-0.14488	0.339811	0.197253
KCTD19_BTB398488	Reader	-0.20318	-0.31639	0.111214	0.15157
KCTD2_BTB74164	Reader	0.157539	0.129477	-0.40701	-0.67277
KCTD21_BTB593	Reader	-0.00542	-1.43291	0.021655	-0.07474
KCTD3_BTB20112	Reader	-0.1548	0.433736	0.272881	0.501664
KCTD4_BTB36123	Reader	0.622208	0.54983	-0.24731	0.182736
KCTD5_BTB46135	Reader	-2.12877	0.846457	1.25613	-0.76972
KCTD6_BTB14102	Reader	0.241402	-0.10645	-0.21127	0.114316
KCTD7_BTB53138	Reader	-0.69097	-0.45666	0.194653	0.047099
KCTD8_BTB46143	Reader	0.647968	0.183227	0.421422	0.268812
KCTD9_BTB91181	Reader	-0.14735	-1.07176	-0.43249	-0.90445
KDM1A_hydroxylase	Catalytic	-3.55108	-0.23331	-4.52967	-1.39926
KDM1B_CW137192	Reader	-0.15833	-1.04157	0.223666	0.758876
KDM1B_hydroxylase	Catalytic	-0.22382	-0.09167	0.152147	0.438923
KDM2A_CXXC576609	Reader	-5.42098	-7.31435	-2.59798	-2.30107
KDM2A_hydroxylase	Catalytic	-3.44565	-1.42644	0.23201	-0.13862
KDM2A_Phd	Reader	-2.20006	-1.52865	-0.84039	-0.64727
KDM2B_CXXC615651	Reader	-1.17377	-0.30184	0.25345	-0.1879
KDM2B_hydroxylase	Catalytic	0.353291	0.224625	0.055566	0.453039
KDM2B_Phd	Reader	-0.63681	-0.71187	0.498288	0.198941
KDM3A_hydroxylase	Catalytic	0.346374	-0.09651	0.771012	0.088215
KDM3B_hydroxylase	Catalytic	-0.23542	-0.78544	1.07212	0.473816
KDM4A_ePhd	Reader	-0.26862	-0.5814	0.029116	0.333329
KDM4A_hydroxylase	Catalytic	-0.37706	-0.15611	-0.04706	-0.00821
KDM4A_Phd	Reader	-0.57681	-0.68751	-0.32888	-0.18542
KDM4A_tudor897953	Reader	-0.45595	-0.45738	-0.6825	-0.49553
KDM4A_tudor9601004	Reader	-0.40357	-0.53631	-1.93375	-0.77006
KDM4B_ePhd	Reader	-1.1232	-0.41761	0.324786	0.231484
KDM4B_hydroxylase	Catalytic	-0.12018	0.832667	0.185984	0.079443
KDM4B_Phd	Reader	0.239199	0.140133	0.006711	-0.2875
KDM4B_tudor921973	Reader	-0.43053	-0.1344	0.384835	-0.23826
KDM4B_tudor9751030	Reader	-0.01697	-0.21246	0.486158	0.062741
KDM4C_ePhd	Reader	-0.41382	0.345373	0.231607	-0.00924
KDM4C_hydroxylase	Catalytic	0.023119	0.116582	0.350152	0.504681
KDM4C_Phd	Reader	0.001824	0.430892	-0.03128	0.731414
KDM4C_tudor879933	Reader	-0.14665	0.103881	0.169651	0.478984
KDM4C_tudor935990	Reader	0.28073	0.607227	0.573987	0.289925
KDM4D_hydroxylase	Catalytic	0.38949	0.935687	0.446492	0.458557
KDM5A_hydroxylase	Catalytic	-1.33628	-0.5586	0.517969	-0.05992
KDM5A_Phd1	Reader	-0.3568	-0.17307	0.78439	-0.45786
KDM5A_Phd2	Reader	-0.67788	0.073913	0.829498	-0.63324
KDM5A_Phd3	Reader	-0.44942	-0.09858	0.315944	-0.19736
KDM5B_hydroxylase	Catalytic	-0.05734	0.60253	-0.17267	0.243925
KDM5B_Phd1	Reader	0.296881	-0.30287	0.421995	0.095605
KDM5B_Phd2	Reader	0.043959	0.066091	0.016151	0.101712
KDM5B_Phd3	Reader	0.060969	-0.09869	0.139442	-0.06135
KDM5C_hydroxylase	Catalytic	-0.34352	1.13519	0.05711	0.415013
KDM5C_Phd	Reader	-0.21658	0.481858	-0.55018	0.188093
KDM5D_hydroxylase	Catalytic	0.724463	0.585455	0.938228	0.682384
KDM5D_Phd1	Reader	0.37498	0.570389	0.85189	0.15487
KDM5D_Phd2	Reader	0.217545	-0.03892	-0.21854	0.034371
KDM6A_hydroxylase	Catalytic	0.993718	0.495009	0.58074	0.900063
KDM6B_hydroxylase	Catalytic	0.79886	-1.16016	0.032356	0.193601
KDM7A_hydroxylase	Catalytic	-0.12605	0.88211	0.05534	0.605529
KDM7A_Phd	Reader	0.043804	-0.17468	0.405908	0.248473
KDM8_hydroxylase	Catalytic	-4.392	-4.81066	-2.07526	-3.14631
KEAP1_BTB67179	Reader	-3.77434	0.783553	0.10897	-0.25957
KLHL1_BTB202305	Reader	-0.08877	0.533572	0.356405	0.410192
KLHL10_BTB29133	Reader	0.207864	-0.00156	-0.27949	0.195781
KLHL11_BTB85200	Reader	-0.38642	-0.05598	-0.19684	0.096844
KLHL12_BTB23130	Reader	-0.70128	0.173501	-0.13755	-0.13102
KLHL13_BTB85191	Reader	0.362519	0.172065	0.081778	0.291135
KLHL14_BTB23181	Reader	-0.6568	-0.04605	0.414249	0.135323
KLHL15_BTB32128	Reader	-0.31913	0.293689	-0.13716	0.265702
KLHL17_BTB82189	Reader	-0.37472	-0.41514	0.419514	0.046832
KLHL18_BTB28135	Reader	0.627091	0.025023	-0.02242	0.076146
KLHL2_BTB50157	Reader	-0.47101	0.218558	0.113593	0.217271
KLHL20_BTB59165	Reader	0.32371	0.771763	0.463335	0.157949
KLHL21_BTB25133	Reader	0.316345	0.512999	-1.20675	-0.06092
KLHL22_BTB51145	Reader	-0.21179	-0.65738	-0.45278	-0.16574
KLHL23_BTB26134	Reader	0.305373	0.554468	0.141874	0.249004
KLHL24_BTB56163	Reader	0.66066	0.390841	0.177921	0.160868
KLHL25_BTB36144	Reader	0.025543	0.320557	0.670978	-0.04567
KLHL26_BTB56157	Reader	0.541229	-1.39279	-0.07973	0.40314
KLHL28_BTB25132	Reader	-0.2703	-0.88953	0.294021	0.083244
KLHL29_BTB319431	Reader	0.102013	0.375753	-0.12593	-0.28085
KLHL3_BTB40147	Reader	0.038887	-0.21055	0.264485	0.368917
KLHL30_BTB23130	Reader	-0.32247	-1.43326	0.037621	-0.00555
KLHL31_BTB63165	Reader	0.42807	0.536574	0.413925	0.397847
KLHL32_BTB32137	Reader	0.500882	0.384654	0.406479	0.161463
KLHL34_BTB19126	Reader	-0.43369	0.596751	-0.2757	0.443418
KLHL35_BTB3170	Reader	-1.87959	-1.56483	-2.79548	-0.9999
KLHL36_BTB36141	Reader	0.554982	-1.16346	-1.34875	-0.54734
KLHL38_BTB24131	Reader	0.444955	0.143035	-0.80672	-0.16084
KLHL4_BTB172279	Reader	0.419702	0.347676	-0.38544	0.240197
KLHL40_BTB23128	Reader	-0.40973	-0.06083	-0.17363	0.028765
KLHL41_BTB23130	Reader	-0.84664	0.365521	-0.03765	0.480752
KLHL5_BTB210317	Reader	0.089982	0.149181	0.060228	0.238053
KLHL6_BTB62167	Reader	0.097295	-0.12969	0.063441	0.124737
KLHL7_BTB34140	Reader	-0.23441	-0.12791	0.270983	-0.06844
KLHL8_BTB57163	Reader	-0.10576	0.449589	0.197619	0.237097
KLHL9_BTB40146	Reader	-0.0978	0.496096	0.175587	0.182162
KMT2A_BD	Catalytic	0.6554	0.49929	-0.34126	0.143255
KMT2A_CXXC11471194	Reader	-0.90566	-0.60217	-0.42242	0.27431
KMT2A_ePhd	Reader	0.114089	-0.463	-0.17246	0.287103
KMT2A_Phd1	Reader	0.125454	0.116139	0.296537	0.190453
KMT2A_Phd2	Reader	-0.1095	-0.13535	-0.31465	0.491019
KMT2A_Phd3	Reader	-0.79928	-0.2177	-0.32343	0.029293
KMT2B_CXXC	Reader	-2.36726	0.271199	0.821643	0.234298
KMT2B_ePhd	Reader	-2.24848	-0.34503	0.535053	0.085472
KMT2B_Phd1	Reader	-0.82436	0.029825	0.397521	0.335911
KMT2B_Phd2	Reader	-0.97356	0.323856	0.187215	0.372498
KMT2B_Phd3	Reader	-1.56973	-0.42203	0.904752	-0.03975
KMT2B_SET	Catalytic	-1.51525	0.392114	0.74708	-0.08499
KMT2C_ePhd1	Reader	-0.19845	0.78711	0.113435	0.244729
KMT2C_ePhd2	Reader	-0.03606	0.411297	0.33855	0.621221
KMT2C_Phd1	Reader	-0.56133	-0.58907	-0.13185	-2.03732
KMT2C_Phd2	Reader	-0.65967	-0.15409	-1.21851	-0.88382
KMT2C_Phd3	Reader	0.438998	0.605304	0.442302	0.592888
KMT2C_Phd4	Reader	-3.13585	-4.1399	-4.87081	-2.59971
KMT2C_Phd5	Reader	-2.81758	-4.65877	-2.84018	-2.27191
KMT2C_Phd6	Reader	-0.825	-1.38533	-3.04877	-1.49925
KMT2C_SET	Catalytic	0.344373	0.214731	0.794084	0.767881
KMT2D_ePhd1	Reader	0.085726	0.902642	0.296376	-1.18111
KMT2D_ePhd2	Reader	-0.23551	-0.53047	-0.33278	-2.87101
KMT2D_Phd1	Reader	0.27199	0.076047	-0.0887	-1.01697
KMT2D_Phd3	Reader	0.240842	-1.17403	-0.84541	-1.46706
KMT2D_Phd5	Reader	-0.62727	0.512055	-0.0617	-2.19947
KMT2D_SET	Catalytic	0.582919	0.333463	-0.27611	-0.70193
KMT2E_Phd	Reader	-0.5018	0.749638	0.334067	0.235159
L3MBTL1_MBT277374	Reader	-0.16449	-0.28812	-0.16692	0.591312
L3MBTL1_MBT385481	Reader	0.078109	-0.20733	0.073992	-0.00742
L3MBTL1_MBT493585	Reader	-0.40996	-0.40695	-0.18975	0.192398
L3MBTL2_MBT183283	Reader	-0.54644	-0.07027	-1.27404	-0.83341
L3MBTL2_MBT294390	Reader	0.129481	0.189375	-0.6981	-1.11663
L3MBTL2_MBT408500	Reader	0.583984	0.554791	-0.40706	-0.43092
L3MBTL2_MBT511604	Reader	-0.32926	0.011472	-0.79232	-0.77867
L3MBTL3_MBT236332	Reader	0.11853	0.383478	0.086455	-0.31505
L3MBTL3_MBT345439	Reader	0.563412	0.425726	0.483645	-0.19905
L3MBTL3_MBT451543	Reader	0.274433	0.035634	0.076369	-0.19376
L3MBTL4_MBT164260	Reader	-0.54917	0.17449	0.44569	0.451499
L3MBTL4_MBT273364	Reader	-0.27528	0.683476	0.285638	0.140735
L3MBTL4_MBT57149	Reader	-0.48785	0.279174	0.23618	0.284089
LBR_tudor956	Reader	-0.43028	-0.72486	0.670147	-0.04301
LZTR1_BTB433573	Reader	0.424184	-0.08903	-0.18254	-0.12326
LZTR1_BTB665799	Reader	0.649062	0.255559	0.812288	-0.22709
MACROD1_Macro153319	Reader	-0.74887	-2.04836	0.708101	-0.31749
MBD1_CXXC168215	Reader	-0.25085	0.307052	-0.14151	0.186258
MBD1_CXXC217262	Reader	-0.21438	0.462857	-0.32153	-0.87548
MBD1_CXXC331377	Reader	0.046674	0.421962	0.1152	-0.13931
MBD1_MBD	Reader	-0.06844	0.679315	0.440825	0.531099
MBD2_MBD	Reader	-0.50641	0.18086	-0.73055	0.163411
MBD3_MBD1	Reader	-0.26109	-1.55424	-0.03166	-0.14889
MBD3_MBD2	Reader	-2.10352	-3.62706	-0.38164	-1.40079
MBD4_MBD	Reader	0.129757	-0.02385	0.341568	0.319169
MBD5_PWWP13831460	Reader	-0.81491	-0.06018	0.924212	0.033859
MBTD1_MBT145245	Reader	-0.71996	-2.73482	-0.20311	-0.14295
MBTD1_MBT262352	Reader	-0.94924	-1.30392	-0.22192	-1.07218
MBTD1_MBT359456	Reader	-0.59422	-0.7982	0.110074	0.009868
MBTD1_MBT468560	Reader	-0.49288	-0.99288	-0.19916	-0.49441
MECP2_MBD	Reader	-0.66191	-0.00186	0.062777	0.127752
MIER1_SANT	Reader	0.134011	-0.41751	-0.33963	0.060005
MIER2_SANT	Reader	-0.36188	0.454222	0.150387	0.147692
MIER3_SANT	Reader	0.199749	0.183417	0.498789	0.55114
MINA_hydroxylase	Catalytic	0.271634	0.618285	0.847883	0.330758
MIS18BP1_SANT	Reader	-2.69457	-4.80769	-1.21666	-3.97315
MLL1_SET	Catalytic	0.389026	0.299007	-0.04443	0.066363
MLL5_SET	Catalytic	0.200089	0.721262	-0.11807	-0.10173
MLLT1_Yeats29112	Reader	-1.31565	-0.07659	-1.81795	0.156679
MLLT10_Phd	Reader	-0.44123	0.334196	-2.01674	0.223833
MLLT3_Yeats29112	Reader	-0.12456	0.422893	0.006782	-0.00655
MLLT6_ePhd	Reader	-0.22099	0.024774	0.176575	-0.02384
MLLT6_Phd	Reader	-0.4554	0.299496	0.052794	0.057478
MOF_AT	Catalytic	-6.86968	-6.12933	-4.2138	-5.66691
MORC1_CW481530	Reader	-0.02437	0.422121	0.365894	0.349358
MORC2_CW432479	Reader	-0.0703	-0.78473	-2.70445	-1.42651
MORC3_CW408446	Reader	0.09765	0.079494	0.278735	0.00537
MORC4_CW424471	Reader	-0.08985	0.409256	0.040208	0.291983
MORF_AT	Catalytic	1.09536	0.619921	0.192866	0.49528
MORF4L1_Chromo	Reader	-1.17725	-0.91412	-0.90309	0.665747
MOZ_AT	Catalytic	-0.41097	-1.57831	-0.97895	0.199891
MPHOSPH8_Chromo	Reader	-1.47585	-1.86745	-1.97504	-0.86336
MSH6_PWWP88195	Reader	-0.23408	0.359413	0.657619	-0.242
MSL3_Chromo	Reader	-0.09399	0.58922	0.269312	0.367129
MTA1_Bah3188	Reader	0.038043	0.166023	0.316841	0.062242
MTA1_SANT	Reader	0.001071	-0.26501	0.01191	0.198247
MTA2_Bah3168	Reader	-0.42824	-0.35115	0.132277	-0.3907
MTA2_SANT	Reader	-0.41793	0.10453	-0.01295	-0.21885
MTA3_Bah3170	Reader	0.023365	-0.15969	0.451926	-0.0808
MTA3_SANT	Reader	-0.25212	0.352764	-0.5271	-0.49077
MTF2_Phd1	Reader	0.9156	-0.09683	-0.24904	0.257547
MTF2_Phd2	Reader	0.348586	0.111231	-0.00558	0.19224
MTF2_tudor4595	Reader	0.170924	-0.56222	0.005267	-0.33647
MUM1_PWWP410489	Reader	0.158892	-0.14785	0.333523	0.200238
MYB_SANT	Reader	-0.11737	0.79603	0.23599	0.08854
MYB_SANT2	Reader	0.127743	-1.21358	0.272803	-0.00185
MYB_SANT3	Reader	-0.21859	-0.48696	0.731533	0.499602
MYBL1_SANT	Reader	-0.53478	0.045364	0.583562	0.253713
MYBL1_SANT2	Reader	0.384461	0.320447	0.477066	0.467495
MYBL1_SANT3	Reader	0.189897	0.340826	0.729528	0.862536
MYBL2_SANT	Reader	-1.74225	-2.21899	-2.58102	-2.23374
MYBL2_SANT2	Reader	-1.11147	-2.86761	-1.26528	-2.92466
MYBL2_SANT3	Reader	-2.41481	-2.67929	-1.70063	-2.64748
MYNN_BTB14111	Reader	0.09679	0.236905	-0.56149	0.031248
MYPOP_SANT	Reader	-0.36252	-2.43783	0.609429	0.251201
MYSM1_SANT	Reader	-0.17299	-0.53689	0.199228	0.426592
NACC1_BTB20122	Reader	-1.40447	0.014633	-2.388	-0.71376
NACC2_BTB20120	Reader	0.372904	0.086491	-0.33646	-0.43112
NAT10_AT	Catalytic	-4.03099	-4.45636	-4.85562	-3.09932
NCOA1_AT	Catalytic	0.085209	-0.07537	-0.23628	0.440782
NCOA2_AT	Catalytic	-0.69769	-0.6633	0.324363	0.704297
NCOR1_SANT	Reader	-0.33191	-0.13311	0.148867	-0.95068
NCOR1_SANT2	Reader	-0.00967	-1.32161	-0.86425	-0.75998
NCOR2_SANT	Reader	-1.72935	-3.32013	-1.74448	-1.34133
NCOR2_SANT2	Reader	-0.42962	-0.23015	-0.07428	-0.4955
neg01_neg	Catalytic	0.749768	0.381682	1.1001	1.09516
neg02_neg	Catalytic	0.116797	-0.15639	0.215959	0.933464
neg03_neg	Catalytic	-0.34415	-1.19253	1.31432	0.692443
neg04_neg	Catalytic	1.03868	-0.05409	1.24654	0.877558
neg05_neg	Catalytic	3.11868	-1.4215	0.152925	0.484494
neg06_neg	Catalytic	-0.36673	-0.14046	0.593371	0.954611
neg07_neg	Catalytic	1.16506	-0.99384	1.11523	0.483906
neg08_neg	Catalytic	0.857551	0.808828	0.979473	1.01947
neg09_neg	Catalytic	0.897677	-0.58355	1.4525	0.932697
neg1	Reader	-0.17844	0.330969	-0.75195	0.47883
neg10	Reader	0.301835	0.919302	0.562908	0.334169
neg10_neg	Catalytic	0.624297	-0.90627	0.000673	0.440978
neg100	Reader	0.800565	0.543583	0.315689	0.56793
neg11	Reader	1.08335	0.687401	0.358667	-0.15319
neg11_neg	Catalytic	0.172924	-0.99481	0.893583	0.087287
neg12	Reader	0.286755	-1.38128	1.54346	0.836053
neg12_neg	Catalytic	1.63577	0.715658	1.31336	-0.23111
neg13	Reader	0.552212	-0.71518	1.35585	1.58814
neg13_neg	Catalytic	0.710734	-0.06644	1.14777	0.91423
neg14	Reader	-0.41196	-2.20022	N/A	N/A
neg14_neg	Catalytic	N/A	N/A	-1.59058	N/A
neg15	Reader	0.298139	-7.43224	1.19065	0.132468
neg15_neg	Catalytic	-1.65317	-0.3517	1.00119	1.09827
neg16	Reader	0.474066	-0.20317	1.18128	0.314099
neg16_neg	Catalytic	0.327478	-1.77064	1.64295	0.130289
neg17	Reader	1.41068	-0.11882	0.823501	0.127187
neg17_neg	Catalytic	0.783009	0.493214	0.630058	0.128743
neg18	Reader	1.28961	0.425816	0.802974	-0.28687
neg18_neg	Catalytic	-0.885	-0.12829	1.30328	0.788587
neg19	Reader	-1.54314	1.37538	1.51684	0.702324
neg19_neg	Catalytic	0.162969	-0.18966	1.44057	0.595219
neg2	Reader	0.511328	0.839543	1.11705	0.059293
neg20	Reader	0.560879	0.519041	-1.65632	0.226508
neg20_neg	Catalytic	0.999832	0.040698	0.219847	0.764994
neg21	Reader	0.512527	0.104758	0.481906	0.855472
neg21_neg	Catalytic	0.586257	0.510153	1.50543	1.23543
neg22	Reader	3.0195	0.977557	0.894928	0.200896
neg22_neg	Catalytic	0.40525	-1.47294	0.424815	1.6328
neg23	Reader	-0.4804	1.60336	-0.08103	0.651543
neg23_neg	Catalytic	-2.41111	1.9092	1.90569	0.608145
neg24	Reader	0.494533	0.777823	-1.87527	-1.00343
neg24_neg	Catalytic	-1.0428	1.55087	0.943426	1.50619
neg25	Reader	0.562342	-1.17181	0.239352	0.431015
neg25_neg	Catalytic	0.725585	1.28514	-0.03027	0.92796
neg26	Reader	-0.21504	-0.10219	0.108477	0.237034
neg26_neg	Catalytic	0.566039	0.923431	1.29714	0.683163
neg27	Reader	0.733875	0.798244	1.56757	0.705617
neg27_neg	Catalytic	1.55411	0.657569	0.773509	0.432402
neg28	Reader	-0.61338	-0.1784	-0.71364	-0.09877
neg28_neg	Catalytic	0.182424	-0.75062	0.475474	1.0826
neg29	Reader	0.011312	-0.29601	0.105235	0.157366
neg29_neg	Catalytic	1.29792	0.090837	1.40646	0.221588
neg3	Reader	-0.10723	0.406476	0.057506	0.541238
neg30	Reader	0.849201	-0.01464	-0.11455	0.743745
neg30_neg	Catalytic	0.739536	0.409943	1.27843	0.90783
neg31	Reader	-0.20242	1.0499	0.384957	-0.07503
neg31_neg	Catalytic	0.452409	1.36166	1.48837	0.171387
neg32	Reader	1.15297	0.11839	0.415648	0.62817
neg32_neg	Catalytic	-0.40893	0.771551	0.54567	1.36338
neg33	Reader	-0.12077	0.007719	0.683016	-0.26039
neg33_neg	Catalytic	0.64876	1.27901	0.58315	0.389172
neg34	Reader	0.52398	0.560312	0.509227	0.676738
neg34_neg	Catalytic	-0.02245	-0.66369	1.51334	0.574626
neg35	Reader	1.49919	0.33394	0.546109	1.04307
neg35_neg	Catalytic	1.58796	0.128441	1.36539	0.319901
neg36	Reader	0.735758	1.3019	-0.13629	0.78668
neg36_neg	Catalytic	-0.03271	-0.23847	1.68408	1.0932
neg37	Reader	-1.26817	0.25782	1.01062	1.28345
neg37_neg	Catalytic	0.70209	-0.12244	1.57545	0.652295
neg38	Reader	-0.03461	-0.26909	1.31974	0.561181
neg38_neg	Catalytic	0.954958	-0.27695	1.17897	1.07485
neg39	Reader	0.626775	-0.4075	1.234	0.623324
neg39_neg	Catalytic	0.594445	0.205152	0.405195	1.05091
neg4	Reader	0.860128	0.206302	-0.09275	0.791154
neg40	Reader	0.260578	-0.00985	1.41608	0.732887
neg40_neg	Catalytic	0.038315	0.541941	1.16721	1.41562
neg41	Reader	-0.42055	1.36281	0.191426	0.562208
neg41_neg	Catalytic	-0.25022	-8.87141	0.308308	0.671
neg42	Reader	1.03548	1.50344	0.975504	0.55731
neg42_neg	Catalytic	1.05155	0.564086	0.996108	0.414505
neg43	Reader	0.062093	-0.65908	1.75174	0.419018
neg43_neg	Catalytic	-1.63811	2.9635	1.69246	0.705077
neg44	Reader	1.06774	0.397051	-0.63994	0.789453
neg44_neg	Catalytic	-0.54132	-0.63331	1.06994	1.42013
neg45	Reader	-0.12402	0.253044	0.722785	0.789654
neg45_neg	Catalytic	0.559773	1.47055	1.45452	0.833069
neg46	Reader	-0.04132	0.501063	-0.12641	0.492201
neg46_neg	Catalytic	1.25839	0.450026	0.484974	0.672484
neg47	Reader	-0.66049	0.045683	1.6329	1.00439
neg47_neg	Catalytic	0.558388	-3.02735	0.864836	1.02301
neg48	Reader	0.359203	-1.31902	0.50754	0.354055
neg48_neg	Catalytic	-0.27314	0.003893	0.714573	0.678213
neg49	Reader	-0.67158	0.949146	-0.83565	-0.20932
neg49_neg	Catalytic	0.261733	1.12754	0.525668	1.2587
neg5	Reader	1.821	0.818909	0.534278	0.919438
neg50	Reader	-0.34074	0.593154	0.823413	0.799472
neg50_neg	Catalytic	1.36474	0.787894	0.492205	0.654098
neg51	Reader	-0.0345	0.428027	1.67568	-0.69335
neg52	Reader	0.207496	0.484127	0.739249	0.910347
neg53	Reader	-0.16367	0.935099	0.719209	1.45842
neg54	Reader	0.939887	-0.31804	1.51237	0.272722
neg55	Reader	0.202503	0.460984	0.759054	0.817598
neg56	Reader	0.542965	0.218309	0.560445	0.628924
neg57	Reader	-0.09328	0.458741	0.249941	-0.24047
neg58	Reader	0.146626	-0.3714	0.502131	0.769765
neg59	Reader	-0.7567	0.839751	-0.10424	0.981606
neg6	Reader	0.808576	0.213539	-0.45638	0.376997
neg60	Reader	0.249437	0.645178	1.17658	0.929129
neg61	Reader	0.211159	-2.07875	-0.94703	-0.79836
neg62	Reader	-0.35169	0.960476	0.107194	1.29972
neg63	Reader	2.07524	0.571192	0.625829	1.24918
neg64	Reader	-1.21931	-0.95786	-1.12201	1.61637
neg65	Reader	0.583448	0.429454	0.600725	0.935729
neg66	Reader	-0.39967	-0.67759	0.806092	0.002578
neg67	Reader	0.987503	-0.04203	1.24331	0.815517
neg68	Reader	-0.24863	-0.10044	0.143594	0.641037
neg69	Reader	1.3825	0.458539	1.39613	0.874959
neg7	Reader	0.725398	0.088768	1.00258	-0.18369
neg70	Reader	0.180429	0.069215	0.801316	0.245886
neg71	Reader	1.18587	-0.21753	0.253591	-0.29972
neg72	Reader	1.78463	0.08187	0.351994	-0.21615
neg73	Reader	-0.14258	0.055555	0.453559	0.380857
neg74	Reader	-0.24933	0.995608	0.011619	0.324708
neg75	Reader	-0.38823	-0.18061	0.968877	0.389339
neg76	Reader	-0.21754	-0.0567	0.254131	0.021381
neg77	Reader	-1.03076	-0.76356	-0.13801	1.04507
neg78	Reader	0.981636	0.390717	-0.05394	0.590632
neg79	Reader	-0.05624	1.10271	0.771729	0.734454
neg8	Reader	0.369825	0.698856	0.253401	0.439237
neg80	Reader	2.09287	-0.01419	0.128497	-0.23953
neg81	Reader	0.563658	-0.67818	0.362414	-0.00246
neg82	Reader	0.43367	-0.20108	0.361359	0.451818
neg83	Reader	0.931915	-0.34166	0.493335	0.181075
neg84	Reader	-0.63173	-0.02722	0.17737	-0.84128
neg85	Reader	0.349123	0.05961	0.080693	0.634713
neg86	Reader	-0.72651	-0.43486	-0.3425	0.532951
neg87	Reader	0.839886	0.505579	-0.06436	0.462323
neg88	Reader	3.43368	0.004247	0.815664	0.014362
neg89	Reader	3.57749	-0.92141	0.88864	0.389748
neg9	Reader	0.957872	0.187929	0.132982	0.254082
neg90	Reader	0.043761	0.245327	0.715123	1.65154
neg91	Reader	1.90708	0.616089	1.16788	0.794519
neg92	Reader	1.12667	0.224499	1.41848	0.740851
neg93	Reader	1.64426	-0.25437	-2.29041	-0.07973
neg94	Reader	-0.09185	-0.13603	2.11446	0.135296
neg95	Reader	0.049342	0.44148	-0.11346	0.752772
neg96	Reader	0.072509	0.847095	0.284629	1.07838
neg97	Reader	0.816518	0.776352	0.464215	1.24316
neg98	Reader	-0.5982	-0.65374	-0.1	0.230173
neg99	Reader	0.396082	-0.14357	0.751777	0.126937
NO66_hydroxylase	Catalytic	1.20423	0.406379	0.442716	0.214306
NSD1_Phd1	Reader	-1.26215	0.285706	0.249551	-0.19112
NSD1_Phd2	Reader	-1.61179	0.320792	0.069206	-0.72667
NSD1_Phd3	Reader	-1.8472	-0.30444	0.225736	-0.11058
NSD1_Phd4	Reader	-1.78137	0.037026	0.034364	-0.54221
NSD1_Phd5	Reader	-1.26594	-0.50381	-0.0547	0.066733
NSD1_PWWP17541848	Reader	-1.50501	0.143767	-0.20895	-0.31111
NSD1_PWWP319429	Reader	-1.1139	-1.87398	0.56837	0.257759
NSD1_SET	Catalytic	-1.3487	-0.25896	-0.00936	0.061085
NSD2_SET	Catalytic	-1.6286	0.929141	-0.88422	-1.24259
NSD3_SET	Catalytic	0.159323	0.130492	0.224819	0.458871
OARD1_Macro14140	Reader	-0.16754	0.437349	0.209051	0.246564
ORC1_Bah44170	Reader	-2.32193	-4.67847	-1.43639	-1.56111
PADI4_hydroxylase	Catalytic	0.0329	0.464967	-0.13713	0.170251
PARP14_Macro10141155	Reader	0.506007	-2.19356	0.064994	-0.11195
PARP14_Macro12271354	Reader	-0.04823	0.168346	-0.08109	-0.24421
PARP14_Macro801977	Reader	-0.18889	0.176667	-0.0874	-0.10695
PARP15_Macro304431	Reader	0.214326	-0.45686	-0.20891	-0.00523
PARP15_Macro89230	Reader	0.142045	0.074263	0.244993	0.432267
PARP9_Macro117295	Reader	0.821646	-0.12206	0.134172	-0.06197
PARP9_Macro317453	Reader	-0.22896	0.326134	-0.06323	0.09971
PATZ1_BTB30159	Reader	-0.02293	-0.25922	0.083569	-0.61545
PBRM1_Bah11301248	Reader	-1.64472	-0.69207	-1.78695	-1.72197
PBRM1_Bah9571049	Reader	-1.40275	-0.00396	-2.27549	-1.22613
PBRM1_BD1	Catalytic	-1.5431	-0.82253	-0.75071	-0.33346
PBRM1_BD2	Catalytic	-0.77894	-0.08812	-1.404	-0.25653
PBRM1_BD3	Catalytic	-0.18199	-0.44278	-1.09382	-0.6165
PBRM1_BD4	Catalytic	-4.25436	0.728955	-0.83144	0.011935
PBRM1_BD5	Catalytic	-0.85771	-0.68773	0.00505	0.461867
PBRM1_BD6	Catalytic	-1.19516	-2.23143	-2.09737	-0.58463
PCAF_AT	Catalytic	0.441516	0.551195	0.31186	0.541813
PCNA_e2.1	Reader	-1.83229	-6.38559	-8.58907	-3.32064
PCNA_e2.2	Reader	-9.00221	-7.91141	-7.77548	-8.71796
PCNA_e3.2	Reader	-8.76847	-9.21058	-9.23624	-9.40434
PCNA_positive	Catalytic	-4.62698	-5.67924	-4.88868	-5.3648
PHF1_Phd1	Reader	-0.705	-0.88264	-1.71584	-0.84755
PHF1_Phd2	Reader	-0.24964	0.249899	0.246425	-0.01766
PHF1_tudor2980	Reader	0.216596	-0.07518	-0.40507	-0.08659
PHF10_Phd	Reader	0.299764	-0.33171	0.751873	0.322089
PHF11_Phd	Reader	0.443777	0.750198	0.370235	0.003355
PHF12_Phd	Reader	-1.3072	-0.45771	-1.26065	-1.55239
PHF13_Phd	Reader	-0.05148	0.261033	0.34995	0.011851
PHF14_ePhd	Reader	-0.60319	0.029186	0.445142	0.355925
PHF14_Phd1	Reader	-0.25769	-0.01032	0.503069	0.329178
PHF14_Phd2	Reader	0.041979	-0.54759	0.299259	0.5819
PHF19_Phd1	Reader	-0.06828	-0.22359	-0.16138	-0.42904
PHF19_Phd2	Reader	-0.50168	0.295951	0.532844	-0.32006
PHF19_tudor4387	Reader	-0.19462	0.344153	-0.11269	-0.05522
PHF2_hydroxylase	Catalytic	0.387641	0.239152	-0.02249	0.238098
PHF2_Phd	Reader	-0.43026	-0.04651	-2.04228	-0.38855
PHF20_Phd	Reader	-1.06539	-1.10514	-1.3591	-0.21539
PHF20_tudor90135	Reader	-1.51465	-0.83948	-0.33601	-0.16515
PHF20L1_Phd	Reader	-0.09488	0.084288	0.25268	0.389913
PHF20L1_tudor90135	Reader	0.70031	0.396375	-0.0672	0.259106
PHF21A_Phd	Reader	-0.50279	0.05329	-0.1988	0.028294
PHF21B_Phd	Reader	0.242514	0.384507	-0.23531	-0.03045
PHF23_Phd	Reader	-0.14635	-4.10452	-0.74912	-0.28269
PHF3_Phd	Reader	-0.18052	-0.80143	0.73555	-0.48676
PHF6_ePhd	Reader	-0.26439	0.139162	-0.48521	0.076903
PHF7_ePhd	Reader	-0.34729	-0.22472	0.142145	-0.3544
PHF7_Phd	Reader	-0.04564	0.007523	-0.31165	-0.17138
PHF8_hydroxylase	Catalytic	0.116109	-0.38878	-0.1653	-0.09114
PHF8_Phd	Reader	-0.15261	-0.392	-0.47565	-0.2165
PhIP_BD1	Catalytic	-0.42962	1.17121	-0.2419	0.303901
PhIP_BD2	Catalytic	0.257899	0.664454	0.436567	0.287324
PHRF1_Phd	Reader	-0.4479	-0.37364	0.014324	-1.02482
POLR2A_e10.1	Reader	N/A	-8.54165	-9.19325	-9.09226
POLR2A_e10.2	Reader	-7.03874	-8.9698	-8.60965	-2.19493
POLR2A_e2.1	Reader	N/A	-7.90513	-7.49485	-8.25359
POLR2A_e2.2	Reader	-7.9584	-7.82747	-2.55932	-2.72261
POLR2A_positive	Catalytic	-2.46117	-4.12915	-4.34941	-3.57306
POLR2D_positive	Catalytic	-2.69989	-5.89277	-5.54615	-4.67338
PRDM2_SET	Catalytic	-0.58927	-0.65957	0.157301	0.578501
PRDM8_SET	Catalytic	0.072329	-0.30554	0.474846	0.488297
PRDM9_SET	Catalytic	0.319528	0.859973	-0.10901	0.450996
PRL9_e3.1	Reader	-9.13466	-9.38333	-9.46354	-2.75319
PRL9_e3.2	Reader	-4.17474	-3.19245	-10.1177	-3.26582
PRL9_e4.1	Reader	-8.24559	-8.93937	-9.22561	-8.87299
PRL9_e4.2	Reader	-9.14028	-8.52945	-8.44533	-4.81409
PRMT1_RMT	Catalytic	-6.91108	-5.80633	-6.46581	-4.89856
PRMT2_RMT	Catalytic	-0.78931	1.12768	-0.314	-0.35046
PRMT3_RMT	Catalytic	-0.57142	0.05867	-0.03696	0.648871
PRMT5_RMT	Catalytic	-6.66345	-6.11878	-8.39208	-4.61368
PRMT6_RMT	Catalytic	-0.31912	0.114452	-0.00297	0.449121
PRMT7_RMT	Catalytic	-0.21987	-0.09318	-0.18898	-0.34124
PRMT8_RMT	Catalytic	0.243548	-0.7166	0.778906	0.330828
PRMT9_RMT	Catalytic	-0.11789	0.68957	1.02956	0.416799
PSIP1_PWWP387	Reader	0.237158	0.949075	-0.10986	0.911288
PWWP2A_PWWP653739	Reader	-0.1005	-0.35433	-0.33406	0.021549
PWWP2B_PWWP488574	Reader	-0.28908	0.335741	0.210228	-0.15351
PYGO1_Phd	Reader	-0.43324	0.680198	0.518669	0.025517
PYGO2_Phd	Reader	0.087369	0.54059	-0.13441	-0.06004
RAD54L_ATPase	Catalytic	-0.44149	0.397186	-0.50395	-0.19884
RAD54L2_ATPase	Catalytic	0.120282	0.531979	0.227931	0.297555
RAI1_ePhd	Reader	-0.26072	-2.25959	-1.51717	-1.60023
RCBTB1_BTB371467	Reader	0.118551	0.245866	-0.07125	-0.2126
RCBTB2_BTB395487	Reader	-0.222	0.110479	-0.00767	0.056087
RCOR1_SANT	Reader	-1.19656	-0.14246	-1.06252	0.452783
RCOR1_SANT2	Reader	-0.67072	0.489847	-0.12637	-0.03487
RCOR2_SANT	Reader	-0.35239	-0.67609	0.303033	0.041546
RCOR2_SANT2	Reader	-0.08725	-0.00859	0.184851	0.086531
RCOR3_SANT	Reader	-0.12108	-1.28238	0.43177	0.132004
RCOR3_SANT2	Reader	-0.12655	-0.94559	0.025956	0.147713
RERE_Bah102307	Reader	-0.14342	0.163086	0.577112	-0.60112
RERE_SANT	Reader	0.047884	0.68617	0.275542	-0.40795
RHOBTB1_BTB396455	Reader	0.083615	0.033417	-0.0763	-0.12358
RHOBTB1_BTB476581	Reader	0.283718	0.060578	0.17916	-0.08459
RHOBTB2_BTB289326	Reader	0.057681	-0.64328	0.350249	-0.04001
RHOBTB2_BTB443492	Reader	-0.54775	0.439212	0.62169	0.226729
RHOBTB2_BTB523615	Reader	-0.16302	0.170043	-0.02653	0.174536
RHOBTB3_BTB413518	Reader	0.214189	0.514302	-0.15363	-0.01236
RNF17_tudor12321277	Reader	-0.38059	0.24067	0.252112	-0.23967
RNF17_tudor14841531	Reader	0.142138	0.096352	0.262756	0.200381
RNF17_tudor419526	Reader	-0.35556	0.460132	-0.1234	-0.0184
RNF17_tudor731776	Reader	0.168338	0.673636	-0.11307	0.25728
RNF17_tudor9671013	Reader	-0.10731	0.008433	0.143349	0.576685
Rosa26_neg	Catalytic	-1.28978	-0.10235	-0.02317	0.046835
RPA3_e1.1	Reader	-1.96958	-9.29474	-2.04425	-8.70883
RPA3_e1.2	Reader	-2.1834	-10.0729	-2.155	-3.5102
RPA3_e1.3	Reader	-2.98542	-4.41933	-9.24679	-2.21183
RPA3_e2.1	Reader	-5.00221	-1.58989	-2.32855	-1.24288
RPA3_positive	Catalytic	-1.64351	-1.02797	-2.50196	-3.0544
RPL23A_e2.2	Reader	-9.4717	-9.48588	-9.71788	-2.81106
RPL23A_e3.1	Reader	-8.90664	-9.43224	-10.1503	-9.64969
RPL23A_positive	Catalytic	-5.1001	-6.00293	-6.30396	-5.47921
RPL9_positive	Catalytic	-4.17271	-4.55893	-6.44845	-8.77011
RSF1_Phd	Reader	-0.12273	-0.81721	0.40735	0.14707
SCMH1_MBT137235	Reader	0.159087	-0.09391	-0.10663	-0.13096
SCMH1_MBT31126	Reader	-0.37139	0.543169	0.149032	0.002387
SCML2_MBT142240	Reader	0.074298	-0.01755	1.03895	0.406157
SCML2_MBT36131	Reader	0.22705	0.00613	0.618234	0.399296
SETD1A_SET	Catalytic	0.192311	0.669925	0.270778	-1.37729
SETD1B_SET	Catalytic	-1.0377	-2.06071	-1.00764	-2.133
SETD2_SET	Catalytic	-7.12485	-0.21779	-4.53066	-1.8207
SETD4_SET	Catalytic	-0.57416	0.3378	0.376868	0.701106
SETD5_SET	Catalytic	-0.93298	0.192936	-0.48198	-0.41391
SETD6_SET	Catalytic	-0.20266	-0.14547	0.103712	0.284442
SETD7_SET	Catalytic	-0.37578	0.029733	0.184779	0.361774
SETD8_SET	Catalytic	-6.06202	-5.79058	-6.34332	-4.09368
SETDB1_MBD	Reader	-0.85	-1.0582	-0.72955	-0.14854
SETDB1_SET	Catalytic	0.120271	-2.10397	-1.20763	-1.14655
SETDB1_tudor257317	Reader	-1.75046	-0.99948	-2.09235	-0.23748
SETDB1_tudor348400	Reader	-1.02288	-3.07108	-1.05088	-0.33293
SETDB2_SET	Catalytic	-0.36877	0.858714	0.133816	-0.05016
SETMAR_SET	Catalytic	-0.45094	1.18352	-0.26181	0.37343
SFMBT1_MBT131232	Reader	0.193369	0.631341	-0.06494	0.107314
SFMBT1_MBT23120	Reader	0.653487	0.181754	0.275039	-0.16436
SFMBT1_MBT252348	Reader	0.831455	0.394141	-0.64013	0.05021
SFMBT1_MBT360453	Reader	0.204961	-0.09807	0.210943	0.167208
SFMBT2_MBT156256	Reader	-0.1285	-0.09144	0.464643	0.121934
SFMBT2_MBT276372	Reader	-0.45042	0.426995	0.283602	0.208499
SFMBT2_MBT384477	Reader	0.068784	0.822926	0.416898	0.417761
SFMBT2_MBT48144	Reader	0.347269	0.245316	0.440957	0.438004
SHKBP1_BTB21107	Reader	0.106206	-0.17849	0.068412	0.126324
SHPRH_ATPase	Catalytic	-0.07307	-0.09435	0.51312	-0.10099
SHPRH_Phd	Reader	0.079893	0.044118	0.516942	-1.019
SIRT1_hydroxylase	Catalytic	-0.10909	-1.64775	-0.08747	0.020892
SIRT2_hydroxylase	Catalytic	-0.12425	0.425133	0.279695	0.276872
SIRT3_hydroxylase	Catalytic	0.276205	0.642447	0.309919	0.146543
SIRT4_hydroxylase	Catalytic	-1.23026	-0.07264	0.219135	0.522982
SIRT5_hydroxylase	Catalytic	0.346009	0.313586	-0.16988	0.717614
SIRT6_hydroxylase	Catalytic	-0.34835	0.113051	0.6444	0.240745
SIRT7_hydroxylase	Catalytic	-0.53647	0.238388	-0.05125	-0.54534
SLX4_BTB699788	Reader	-1.26212	-0.76972	0.541761	-2.42356
SMARCA1_SANT	Reader	-0.06626	0.054282	0.216348	-0.0664
SMARCA2_ATPase	Catalytic	-0.4132	0.965441	-0.26689	0.020175
SMARCA2_BD	Catalytic	-0.24713	1.05412	0.191346	0.697526
SMARCA4_ATPase	Catalytic	fully depleted	-8.34427	-4.54757	-3.16688
SMARCA4_BD	Catalytic	-1.5813	0.965841	-2.61634	-0.93804
SMARCA5_SANT	Reader	-1.53377	-4.418	-2.61401	0.278519
SMARCAD1_ATPase	Catalytic	-0.01514	-0.14795	0.438642	-0.16455
SMARCAL1_ATPase	Catalytic	0.467107	-3.74276	0.134383	-0.32157
SMARCC1_Chromo	Reader	-0.24675	0.46882	0.134079	-0.00668
SMARCC1_SANT	Reader	-0.15036	0.261186	-0.49184	-0.5245
SMARCC2_Chromo	Reader	0.118987	-0.30593	-0.25733	-0.29897
SMARCC2_SANT	Reader	0.286028	-0.17607	-0.25136	-0.13195
SMN1_Tudor	Reader	-3.56088	-1.26154	-1.32929	-2.36127
SMN2_Tudor	Reader	N/A	N/A	N/A	N/A
SMNDC1_tudor76124	Reader	-2.74106	-2.13052	-0.61124	-2.41601
SMYD1_SET	Catalytic	0.277879	-0.97872	0.870616	0.304556
SMYD2_SET	Catalytic	0.166275	0.164612	0.090316	0.481374
SMYD3_SET	Catalytic	0.289038	-0.87428	-0.1578	0.465141
SMYD4_SET	Catalytic	0.561874	-1.77984	0.504458	0.040683
SMYD5_SET	Catalytic	-0.42712	-0.1214	-0.07926	0.543528
SNAPC4_SANT	Reader	-4.137	-6.68287	-6.07114	-4.75314
SNAPC4_SANT2	Reader	-6.61683	-5.99311	-6.97973	-4.38293
SNAPC4_SANT3	Reader	-5.64735	-7.10582	-6.7499	-7.27617
SNAPC4_SANT4	Reader	-8.61468	-9.12903	-5.69736	-7.61111
SND1_tudor733777	Reader	-0.24395	0.648121	0.46073	0.97149
SP100_BD	Catalytic	-0.25035	0.98028	-0.40432	0.542153
SP110_Phd	Reader	0.030847	-0.2793	-0.37509	-0.41254
SP140_BD	Catalytic	-0.49004	1.64244	-0.98471	0.301728
SP140_Phd	Reader	-0.33445	-0.50874	-1.95373	-0.396
SP140L_BD	Catalytic	-0.41699	-1.52517	0.047494	0.097612
SP140L_Phd	Reader	-0.2109	-2.4126	-0.23283	0.202627
SPIN1_Spinlin133181	Reader	-0.46013	-0.24238	-0.97887	-0.00028
SPIN1_Spinlin214258	Reader	-0.29126	0.148134	-1.99814	0.30146
SPIN1_Spinlin54102	Reader	-0.19089	0.521409	-0.65213	-0.15338
SPIN2A_Spinlin129177	Reader	-0.61018	0.117284	-0.1706	0.059538
SPIN2A_Spinlin210254	Reader	-0.63017	-0.26195	-1.10428	-0.12062
SPIN2B_Spinlin129177	Reader	0.155002	0.999964	0.196736	0.655946
SPIN2B_Spinlin210254	Reader	0.000601	-0.11697	1.18137	0.713183
SPIN3_Spinlin129177	Reader	-0.19632	0.459918	0.206155	0.501053
SPIN3_Spinlin210254	Reader	-0.26515	-0.18682	-0.32514	0.045261
SPIN3_Spinlin5098	Reader	-0.56887	0.313978	-0.42859	0.195486
SPIN4_Spinlin119167	Reader	0.304939	-0.1696	0.462167	0.665243
SPIN4_Spinlin201245	Reader	-0.02553	0.214611	0.137964	-0.08585
SPIN4_Spinlin4189	Reader	0.141956	-0.18571	0.307521	0.035185
SPOP_BTB190297	Reader	-1.24801	-0.11191	-0.96336	-2.71336
SPOPL_BTB190297	Reader	0.280278	0.449106	0.290526	0.432604
SRCAP_ATPase	Catalytic	-5.82515	N/A	-3.13311	-5.81412
STK31_tudor31147	Reader	0.0422	-0.12354	0.367146	0.320066
STK31_tudor89129	Reader	N/A	N/A	N/A	N/A
SUV39H1_Chromo	Reader	0.340948	0.220594	-0.15092	-0.21773
SUV39H1_SET	Catalytic	0.805904	0.303744	-0.0243	0.464242
SUV39H2_Chromo	Reader	0.183676	0.375979	0.039208	-0.13423
SUV39H2_SET	Catalytic	-0.06547	-0.1065	0.498947	0.333719
SUV420H1_SET	Catalytic	-1.22234	-2.25501	-0.36544	-0.78511
SUV420H2_SET	Catalytic	0.269358	-1.18725	0.413056	0.54743
TADA2A_SANT	Reader	0.122222	-1.73011	-1.07214	-0.98934
TADA2B_SANT	Reader	-1.25415	-0.1449	-1.93329	-0.09288
TAF1_AT	Catalytic	-2.95161	-3.84266	-2.85895	-1.9009
TAF1_BD1	Catalytic	-2.98862	-0.5846	-2.28376	-1.13331
TAF1_BD2	Catalytic	-3.95247	-4.24908	-5.94536	-4.25802
TAF3_Phd	Reader	-4.09745	-1.12203	-4.48609	-0.33448
TCF19_Phd	Reader	0.329925	0.120487	-0.20081	0.10819
TCF20_ePhd	Reader	0.136339	0.784726	-1.2725	-0.07408
TDRD1_tudor316364	Reader	-0.07956	0.145052	0.542362	0.51022
TDRD1_tudor545592	Reader	-0.66503	0.367264	-0.10818	0.096664
TDRD1_tudor766813	Reader	-0.49436	0.020952	0.147108	0.202057
TDRD1_tudor9941040	Reader	0.649324	-1.21331	0.096544	0.065463
TDRD10_tudor200315	Reader	0.185649	-0.23071	0.253696	0.306948
TDRD12_tudor60109	Reader	0.085825	0.24383	0.188192	0.384424
TDRD15_Tudor	Reader	0.107323	0.005526	0.383206	0.33968
TDRD3_tudor652700	Reader	0.500516	0.354716	0.263605	0.068369
TDRD5_tudor529575	Reader	-0.09538	0.282551	0.320646	0.362298
TDRD6_tudor10371080	Reader	-0.08901	-0.61138	0.116076	0.584592
TDRD6_tudor13091422	Reader	-0.10348	-0.16688	0.107049	0.104575
TDRD6_tudor13561401	Reader	-0.33616	0.23325	0.400801	0.087241
TDRD6_tudor15711609	Reader	-0.23484	0.306826	0.346156	0.415867
TDRD6_tudor314360	Reader	-0.06435	-1.07372	-0.10778	0.317179
TDRD6_tudor541585	Reader	-0.40554	0.166096	-0.62016	0.229262
TDRD6_tudor69133	Reader	0.445901	-1.00539	0.022416	0.380488
TDRD6_tudor821866	Reader	-0.18571	0.130893	-0.02327	0.241587
TDRD7_tudor517559	Reader	-0.0824	-0.00423	0.309185	-0.03656
TDRD7_tudor707752	Reader	-0.2791	0.333669	-0.7305	0.353168
TDRD7_tudor9631007	Reader	-0.5056	0.405726	-0.3687	0.35056
TDRD9_tudor949996	Reader	-0.08751	0.467335	1.21786	0.720375
TDRKH_tudor357404	Reader	-0.22389	0.102667	-0.1136	-0.09468
TERF1_SANT	Reader	-0.58784	-3.68287	-1.55159	-1.6658
TERF2_SANT	Reader	-8.33744	-8.09564	-8.22784	-7.63689
TET1_CXXC585624	Reader	-0.06591	0.2226	0.130582	0.526233
TET1_hydroxylase	Catalytic	-0.23797	-0.06036	0.279392	0.193906
TET2_hydroxylase	Catalytic	0.487091	0.088403	0.810645	0.653974
TET3_CXXC	Reader	0.401468	0.199406	0.219353	-0.01253
TET3_hydroxylase	Catalytic	0.194708	-1.15177	0.367101	0.234769
TIP60_AT	Catalytic	-3.93404	-7.9703	-6.29425	-6.4052
TIP60_e10	Reader	-5.56374	-7.00344	-6.01567	-9.37241
TNFAIP1_BTB30120	Reader	-0.10418	0.606055	-0.25499	-0.25751
TNRC18_Bah28162960	Reader	-0.941	-2.12609	-1.03305	-0.685
TNRC18_tudor21702290	Reader	-0.42143	-0.77712	-0.27829	-0.53903
TRERF1_SANT	Reader	-0.34209	-0.02255	-0.21026	-0.2349
TRIM24_BD	Catalytic	-0.1989	0.121612	0.653073	0.62056
TRIM24_Phd	Reader	-0.30051	0.324757	0.464467	0.588521
TRIM28_BD	Catalytic	-1.7973	-0.54887	-0.48035	-0.51487
TRIM28_Phd	Reader	-1.3587	-0.79399	-1.08937	-0.72116
TRIM33_BD	Catalytic	-0.56779	-1.01411	0.002464	-0.02811
TRIM33_Phd	Reader	-0.09887	-0.19938	-0.2515	-0.24818
TRIM66_BD	Catalytic	0.292677	0.884558	0.249142	0.480994
TRIM66_Phd	Reader	0.104448	0.333611	0.270711	0.023633
TSNARE1_SANT	Reader	-0.34547	-0.31956	-0.17018	0.196879
TTF1_SANT	Reader	-8.59658	-9.04386	-8.57944	-6.26681
TTF2_ATPase	Catalytic	-5.62038	-5.22786	-5.15442	-6.03441
TTF2_D	Reader	-7.14099	-7.45384	-4.76242	-8.03838
UBR7_Phd	Reader	0.567974	0.204184	0.51988	0.144203
UHRF2_Phd	Reader	-0.49228	-0.0399	0.481767	0.155981
UTY_hydroxylase	Catalytic	0.583169	0.717386	0.807422	0.844344
WHSC1_PWWP218337	Reader	-0.55542	-0.49055	-0.17391	-0.75265
WHSC1_PWWP878972	Reader	-1.24166	-0.59196	-0.71478	-0.6704
WHSC1L1_Phd	Reader	-0.12196	-0.36066	0.054155	0.52863
WHSC1L1_PWWP264324	Reader	0.400537	-4.16912	-0.25758	0.640765
WHSC1L1_PWWP267383	Reader	-0.47855	-0.31299	-1.05604	0.477978
WHSC1L1_PWWP9581051	Reader	0.437061	-0.05424	0.696798	0.393874
YEATS2_Yeats231310	Reader	-4.81694	-4.45898	-4.24028	-2.26905
YEATS4_Yeats44126	Reader	-2.35209	-3.91388	-4.22607	-2.67518
ZBTB1_BTB14109	Reader	-0.19938	-0.20023	0.509168	0.043157
ZBTB10_BTB354461	Reader	-0.13973	-0.37296	-0.26989	-0.24144
ZBTB11_BTB204306	Reader	-4.23398	-5.83568	-6.69271	-3.92217
ZBTB12_BTB23127	Reader	-0.78477	-1.31978	-0.5032	-0.28321
ZBTB14_BTB26132	Reader	-0.13988	-1.14319	0.287138	-0.34496
ZBTB16_BTB25125	Reader	-0.44	-0.4099	0.146843	0.093469
ZBTB17_BTB14109	Reader	-4.42384	-2.58374	-4.04779	-2.34764
ZBTB18_BTB23119	Reader	-0.5948	-0.19177	-0.03292	0.533574
ZBTB2_BTB1484	Reader	-1.33922	-0.50027	-0.45399	-0.11508
ZBTB20_BTB94196	Reader	-0.61381	-0.62681	0.354833	-0.15505
ZBTB21_BTB20120	Reader	0.621854	0.25619	0.422617	0.363483
ZBTB22_BTB47149	Reader	-1.02947	-0.35618	0.000247	-0.2071
ZBTB24_BTB27133	Reader	-0.62736	-0.08564	-0.30246	-0.10595
ZBTB25_BTB14114	Reader	0.438492	0.069802	0.44444	-0.10896
ZBTB26_BTB23123	Reader	0.088709	0.195294	-0.66709	-0.26083
ZBTB3_BTB64170	Reader	-0.11775	-0.79854	-0.53655	0.499036
ZBTB32_BTB23109	Reader	-0.35872	-1.32087	1.14782	0.309422
ZBTB33_BTB22116	Reader	0.515305	0.495234	0.331242	0.552308
ZBTB34_BTB22122	Reader	-1.06444	0.037129	-0.17623	0.013017
ZBTB37_BTB22122	Reader	-0.30084	0.295593	0.179516	0.237916
ZBTB38_BTB23122	Reader	0.039764	0.367026	0.174875	0.64251
ZBTB39_BTB20120	Reader	0.264102	-0.89694	-0.08676	-0.06656
ZBTB4_BTB2062	Reader	-0.08886	-0.14233	-2.03123	0.109353
ZBTB40_BTB19113	Reader	-0.48987	0.142978	0.340953	0.094107
ZBTB41_BTB77173	Reader	0.300783	0.26541	0.287637	0.221459
ZBTB42_BTB14121	Reader	0.319027	0.317299	-0.21111	0.354413
ZBTB43_BTB23123	Reader	-0.69609	-0.00427	0.45405	-0.18717
ZBTB44_BTB21128	Reader	-0.16687	-0.01695	0.386269	0.10399
ZBTB45_BTB23122	Reader	-1.30125	-0.4684	0.589379	-0.19962
ZBTB46_BTB21126	Reader	-0.72106	0.257585	0.177721	-0.00626
ZBTB47_BTB4113	Reader	-0.3375	0.375759	-0.47922	0.027277
ZBTB48_BTB16119	Reader	-0.44535	-0.29276	0.148796	-0.27954
ZBTB49_BTB15118	Reader	-0.46418	0.378894	0.819703	-0.11153
ZBTB5_BTB14121	Reader	-0.57115	-0.10265	-0.76292	-0.08778
ZBTB6_BTB23127	Reader	0.165055	0.062284	-0.16205	0.093267
ZBTB7A_BTB24131	Reader	-1.06662	1.27319	0.349768	-0.62608
ZBTB7B_BTB58178	Reader	0.038844	0.054978	0.140287	-0.67455
ZBTB7C_BTB24127	Reader	0.449468	0.046884	0.113841	0.015197
ZBTB8A_BTB14122	Reader	-0.31542	-1.67461	-0.41302	0.087127
ZBTB8B_BTB14122	Reader	-0.04654	-0.14123	-0.48003	-0.1793
ZBTB9_BTB38140	Reader	-0.1226	-0.0178	-0.00645	-0.45563
ZCWPW1_CW256303	Reader	-0.60689	0.115624	-0.00093	0.276221
ZCWPW1_PWWP313416	Reader	-0.03634	0.457857	0.548176	0.367035
ZCWPW2_CW3078	Reader	-0.06039	-0.30601	-0.58518	-0.23342
ZCWPW2_PWWP97160	Reader	0.210861	0.308622	0.45258	-0.01815
ZKSANT2_SANT	Reader	-0.6686	-0.53264	0.314071	-0.1686
ZKSANT2_SANT2	Reader	-0.54553	-0.39332	0.363364	-0.34019
ZMYND11_BD	Catalytic	0.897412	0.01417	0.403059	0.159923
ZMYND11_Phd	Reader	0.351381	0.407698	-0.019	0.13552
ZMYND11_PWWP272353	Reader	0.131026	0.149882	-0.70549	-0.05972
ZMYND8_BD	Catalytic	-0.93221	0.042813	0.141896	0.312302
ZMYND8_Phd	Reader	-0.50968	0.127372	-0.25106	-0.19638
ZMYND8_PWWP289369	Reader	-1.44572	-0.08313	-0.58578	-0.11506
ZNF131_BTB24129	Reader	-4.49588	-6.86171	-4.95419	-3.81284
ZNF541_SANT	Reader	0.147561	0.506404	-0.18001	0.510891
ZSCAN20_SANT	Reader	-0.50132	0.164582	-0.34028	-0.32975
ZSCAN20_SANT2	Reader	-0.19199	-0.13963	-0.36643	-0.10271
ZZZ3_SANT	Reader	-3.73101	-6.30017	-2.79049	-1.74506
