# Supplementary material for: BAF complexes drive proliferation and block myogenic differentiation in fusion-positive rhabdomyosarcoma
Source: Research Square preprint supplement (doi:10.21203/rs.3.rs-131009/v1), 2021-01-07
Supplement: Supplementary file 8 [file 7eec92a0de293e16daf7090c.xlsx]

## Sheet: TS5A LentiCRISPR
Table S1 LentiCRISPR
CRISPR plasmids used in this study	Catalog Nr.	Company
Cas9 activity reporter with BFP	#67984	Addgene
Cas9 mNeonGreen	#134966	Addgene
sg_shuttle_RFP657 vector	#134968	Addgene
pCMV-VSV-G	#8454	Addgene
psPAX2	#12260	Addgene
CRISPR-Cas9 expression plasmid	n.a.	Christopher Vakoc, CSHL
CRISPR guide RNA catalytic domain library	n.a.	Christopher Vakoc, CSHL
CRISPR guide RNA reader domain library	n.a.	Christopher Vakoc, CSHL
Sequence information for sgRNAs (w/o PAM)
sgscr_1 (neg. ctrl. 1)	GTAGCGAACGTGTCCGGCGT
sgscr_2 (neg. ctrl. 1)	GACCGGAACGATCTCGCGTA
sgBRM_1 (SMARCA2_1)	TGCCCTTCATGGATCCACAA
sgBRM_2 (SMARCA2_2)	TTCAGGCCCGCATAGCTCAT
sgBRG1_1 (SMARCA4_1)	GGTCCTGTTGCGGACACCGA
sgBRG1_2 (SMARCA4_2)	GGGGCAGCAGCATTCGCCAT
sgBAF47_1 (SMARCB1_1)	GACGGCGAGTTCTACATGAT
sgBAF47_2 (SMARCB1_2)	AACTACCTCCGTATGTTCCG
sgPAX3-FOXO1_1	CACGAATGAACTTGCTGTGT
sgPAX3-FOXO1_2	CATGAGGTCATTCCGAATGA
sgBRG1 (SMARCA4) (all ChIP-Seq experiments)	ATCGCGGCTTTAAATACCTC

## Sheet: TS5B Antibodies
Table S2 Antibodies
Western Blot
Antibody	Catalog Nr.	Company
beta Tubulin (D309W)	86298S	Cell Signaling Technologies
BRG1 (A52)	3508S	Cell Signaling Technologies
BRM (D9E8B)	11966S	Cell Signaling Technologies
Cleaved Caspase 7 (D198)	9491S	Cell Signaling Technologies
Flag (clone M2)	F1804	Sigma Aldrich
FOXO1 (H-128)	sc-11350	Santa Cruz Biotechnologies
GAPDH (14C10)	2118L	Cell Signaling Technologies
MYHC	MF20-c	Developmental Studies Hybridoma Bank
MYCN	9405S	Cell Signaling Technologies
PARP (46D11)	9532	Cell Signaling Technologies
PLK1 (clone 35-206)	05-844	Millipore
SMARCB1/BAF47 (D8M1X)	91735S	Cell Signaling Technologies
SMARCC1/BAF155 (D7F8S)	11956S	Cell Signaling Technologies
Strep-HRP	016-030-084	Jackson Immunoresearch
anti-mouse HRP	7076	Cell Signaling Technologies
anti-rabbit HRP	7074	Cell Signaling Technologies
easyBlot anti-mouse HRP	GTX221667-01	GeneTex
easyBlot anti-rabbit HRP	GTX221666-01	GeneTex
PBRM1 (BAF180)	91894	Cell Signaling Technologies
BAF47 (SMARCB1)	ab192864	Abcam
SEC-IP-MS
IgG	I5006	Sigma
PBRM1 (BAF180)	91894	Cell Signaling Technologies
BRG1	ab110641	Abcam
CoIP
Antibody	Catalog Nr.	Company
BRG1	ab110641	Abcam
FOXO1 (C-20)	sc-9808	Santa Cruz Biotechnologies
Immunofluorescence
Antibody	Catalog Nr.	Company
Flag	F1804	Sigma Aldrich
Strep Alexa-Fluor 594 conjugate	S11227	Thermo Fisher
MHC	MF20-c	Developmental Studies Hybridoma Bank
Alexa-Fluor 488 goat anti-mouse	A11029	Thermo Fisher
Alexa-Fluor 594 goat anti-mouse	A11032	Thermo Fisher
ChIP
Antibody	Catalog Nr.	Company
BRG1	ab110641	Abcam
H3K27ac	39133	Active Motif
MYCN (NCM-II 100)	MA1-170	Thermo Fisher
SMARCC1	ab172638	Abcam
Drosophila Spike-in Antibody	61686	Active Motif
BRD9	ab137245	Abcam
DPF2	ab134942	Abcam
PBRM1	61381	Active Motif
Drosophila Spike-in Chromatin	53083	Active Motif

## Sheet: TS5C TaqMan Assays
Table S3 TaqMan Assays
(Applied Biosystems by Thermo Fisher Scientific)
Gene Name	Assay Catalog Nr.
MYL1	Hs00984899_m1
MYH3	Hs01074230_m1
MYH4	Hs00757977_m1
MYH8	Hs00267293_m1
TNNC2	Hs00268519_m1
TNNT3	Hs00952980_m1
CKM	Hs00176490_m1
GAPDH	Hs02758991_g1
MYOD1	Hs02330075_g1
MYOG	Hs01072232_m1
MEF2C	Hs00231149_m1

## Sheet: TS5D ChIP-qPCR primers
Table S3 ChIP-qPCR primers
				Primer pairs			Gene Hancer (GH) Regulatory Elements
	Sequence (5'-3')				amplicon genomic location		GH genomic location		GH Identifier	GH Type	GH Score	Gene association score	Gene targets
Target	forward	reverse			(hg 38)	(hg 19)	(hg 38)	(hg 19)						comment
Desert	AACCTCACTTTCATTGTTACTAGCCATA	CGCTCAAGGATGTCAGTAGCAT		Desert	chr7:86,429,756-86,429,839	chr7:86,059,072-86,059,155	n.a.	n.a.	n.a.	n.a.	n.a.	n.a.	n.a.
MYOD1_A	AGCAGTCGGGTGTTGGAGAG	GCGTGCGCGCTAGGTC		MYOD1_A	chr11:17,719,272-17,719,386	chr11:17,740,819-17,740,933	chr11:17718224-17722303	chr11:17739771-17743850	GH11J017718	Promoter/Enhancer	1.5	750.6	MYOD1 LINC02729 ENSG00000254586 piR-31199-047
MYOD1_B	CCAGCTGTGGCGTCGTT	GCGGCGGTCACACAGCATTA		MYOD1_B	chr11:17,695,964-17,696,072	chr11:17,717,511-17,717,619	chr11:17696247-17703399	chr11:17717794-17724946	GH11J017696	Enhancer	1	0.4	LINC02729 SAAL1 GTF2H1 SNORD14A SPTY2D1 SNORD14B ENSG00000256361 PIK3C2A ENSG00000256282 ENSG00000254586 MYOD1	closest RE
MYOG	GCTGTTGCTGCACATCAAGG	TTACACCCGACGGCCTCC		MYOG	chr1:203,086,109-203,086,250	chr1:203,055,237-203,055,378	chr1:203082421-203087866	chr1:203051549-203056994	GH01J203081	Promoter/Enhancer	1.8	750.6	MYOG MYOPARR-001 PPFIA4 ADORA1
MEF2C	ATCCAATAGCAGCCCGAAGA	ACACACGCACACATCGTCTC		MEF2C	chr5:88,883,126-88,883,226	chr5:88,178,943-88,179,043	chr5:88874868-88891279	chr5:88170685-88187096	GH05J088874	Promoter/Enhancer	3	754.4	MEF2CAS1 MEF2C ENSG00000250831 piR-52356 lnc-TMEM161B-10 piR-48369-158
TNNT2_A	AAGTGGGGGTCAGAAATAGGA	TCCTTCTCTCTGCAAAAGTGG		TNNT2_A	chr1:201,376,529-201,376,599	chr1:201,345,657-201,345,727	chr1:201373201-201380083	chr1:201342329-201349211	GH01J201374	Promoter/Enhancer	1.8	750.6	TNNT2 lnc-LAD1-1 LAD1 ENSG00000286600 lnc-TNNT2-2
TNNT2_B	TTGGCTGCTATTTTGGCAGGT	TGGAGGACCACATGGGCTTAT		TNNT2_B	chr1:201,377,812-201,377,892	chr1:201,346,940-201,347,020	chr1:201373201-201380083	chr1:201342329-201349211	GH01J201374	Promoter/Enhancer	1.8	750.6	TNNT2 lnc-LAD1-1 LAD1 ENSG00000286600 lnc-TNNT2-2
TNNT3	TCTGTGCAGTCCCTGCTACG	AGCTGAGGTCAGAGGGATAGG		TNNT3	chr11:1,917,672-1,917,765	chr11:1,938,902-1,938,995	chr11:1916360-1932885	chr11:1937590-1954115	GH11J001916	Promoter/Enhancer	1.9	763.1	TNNT3 H19 TSSC4 MRPL23-AS1 LINC01150 NONHSAG007402.2 lnc-CTSD-5
CKM	TGATACCCTGACCAAGTGCTG	GTGGCTTCTACGTGCTTGGG		CKM	chr19:45,323,099-45,323,203	chr19:45,826,357-45,826,461	chr19:45320298-45324998	chr19:45823556-45828258	GH19J045320	Promoter/Enhancer	1.9	760.7	CKM NECTIN2 ENSG00000269148 FBXO46 BCL3 CCDC61 RELB CLASRP ZNF180 VASP SIX5 KLC3 MARK4 ERCC2 DMPK RTN2 PPM1N CD3EAP RF00017-3002
MYH3	TGCAGAGAAAGGGCGGACAA	GAATGGGCAAAAGCGTCCG		MYH3	chr17:10,658,129-10,658,246	chr17:10,561,446-10,561,563	chr17:10652008-10660249	chr17:10555325-10563566	GH17J010652	Enhancer	0.8	5.2	MYH3 TMEM220-AS1 ENSG00000261433 HSALNG0114528
MYHAS	ATCAAACGACCCTCTCTTCACC	TTGGAATTCTTTTAAAGGCTCATGT		MYHAS	chr17:10,384,462-10,384,592	chr17:10,287,779-10,287,909	chr17:10382525-10386442	chr17:10285842-10289759	GH17J010382	Enhancer	0.6	750.6	ENSG00000272736 MYHAS MYH8 MYH4 RF00017-2283
TNNC2	GGGGCTGGACACCAAGGAATG	GGCCTTATTTAGCTTGGCCC		TNNC2	chr20:45,828,791-45,828,904	chr20:44,457,430-44,457,543	chr20:45825675-45829574	chr20:44454314-44458213	GH20J045825	Promoter/Enhancer	1.7	750.4	TNNC2 WFDC3 SNX21 CD40 ENSG00000237464 HSALNG0130426
Drosophila Positive Control Primer Set Pbgs	Active Motif, 71037

## Sheet: TS5E Compound information
Table S5 Compounds used in this study
Compound	Catalog Nr.	Company
ACBI1	n.a.	University of Dundee, Institute of Chemical and Structural Biology available at Boehringer Ingelheim (opnMe)
cis	n.a.	University of Dundee, Institute of Chemical and Structural Biology available at Boehringer Ingelheim (opnMe)
ATPi	HY-119374	MedChemExpress
Entinostat	n.a.	NCI Development Therapeutics Program (DTP), https://dtp.cancer.gov/
DMSO	D8418	Sigma

## Sheet: TS5F Buffers and Reagents
Table S5 Buffers and Reagents
Prepared in house
Lysis buffer for BioID	50mM TrisHCl pH7.5, 150mM NaCL, 1mM EGTA, 1%Triton-X, 0.1% SDS
RIPA buffer	50 mM Tris-Cl pH 7.5, 150 mM NaCl, 1% NP-40, 0.5% Na-deoxycholate, 1 mM EGTA, 0.1% SDS, 50 mM NaF, 10 mM sodium β-glycerolphosphate, 5 mM sodium pyrophosphate, 1 mM sodium orthovanadate, Complete Mini Protease Inhibitor cocktail (Roche Diagnostics)
Lysis buffer for CoIP	50mM Tris-Cl pH=7.5, 80mM NaCl, 10%Glycerol, 0.3%NP-40, 1.5mM MgCl2, 25mM NaF, 10mM β-glycerolphosphate, 5mM Na-pyrophosphate, 2mM Na3VO4, supplemented with protease inhibitor cocktail
PI solution for cell cycle analysis	20 μg/ml PI and 200 μg/ml RNase in PBS with 0.1% Triton X-100
ChIP IP Buffer	200 mM NaCl, 0.1% SDS, 0.1% deoxycholate, 1% Triton X-100, 10 mM Tris pH 7.4, 1 mM EDTA, protease inhibitors
ChIP Wash Buffer	0.1% SDS, 0.1% deoxycholate, 1% Triton X-100, 10 mM Tris pH 7.4, 1 mM EDTA
LiCl Buffer	0.25M LiCl, 0.5% NP-40, 0.5% deoxycholate, 10 mM Tris pH 7.4, 1 mM EDTA
Buffer A	25 mM HEPES pH 8.0, 5 mM MgCl2, 25 mM KCl, 0.05% EDTA, 10% glycerol (v/v), 0.1% NP-40 (v/v), 1 mM DTT, protease inhibitors
Buffer C	10 mM HEPES pH 8.0, 3 mM MgCl2, 100 mM KCl, 0.1 mM EDTA, 10% glycerol (v/v), 1 mM DTT, protease inhibitors
SEC-IP buffer	150 mM NaCl, 50mM Tris pH 8.0, 1% NP-40, 0.5% deoxycholate, 1 mM DTT, protease inhibitors
LCMS buffer	25 mH HEPES pH 8.0, 1 mM DTT, protease inhibitors
Commercial Kits
Kit	Catalog Nr.	Company
RNeasy Plus Mini Kit	74136	Qiagen
Omniscript RT Kit	205113	Qiagen
TruSeq Stranded Total RNA Library Prep Kit	20020596	Illumina
Pierce BCA Protein Assay Kit	23225	Thermo Fisher
iDeal ChIP-seq kit for Transcription Factors	C01010055	Diagenode
TaqMan Universal PCR Master Mix	4304437	Thermo Fisher
PowerUp SYBR Green Master Mix	A25742	Thermo Fisher
End-It DNA End-Repair Kit	ER81050	Lucigen/Epicentre
MinElute PCR Purification Kit	28004	Qiagen
Chemical Reagents	Catalog Nr.	Company
Formaldehyde	28906	ThermoFisher
Ammonium sulfate	A4418	SIGMA
Glycine	G7126	SIGMA
Proteinase K	53001	Active Motif
Drosophila spike-in chromatin	53083	Active Motif
Protease Inhibitor cocktail	37490	Active Motif
Blocking buffer	37498	Active Motif
Common Material
DMEM	112-013-101	Quality Biological
Fetal Bovine Serum	A3160502	ThermoFosher
PBS	114-057-101 CS	VWR
Ultracentrifuge tubes (Thickwall, Polycarbonate, 1 mL, 11 mm Diameter, 34 mm Length)	343778	Beckman Coulter
NuPAGE™ 4-12% Bis-Tris Protein Gels, 1.5 mm	NP0335BOX	ThermoFosher

## Sheet: TS5G Software and Algorythms
Table S5G Software and Algorythms
Bowtie 2	http://bowtie-bio.sourceforge.net/bowtie2/index.shtml
MACS2	https://github.com/taoliu/MACS
DESeq2	http://www.bioconductor.org
SICER-df	https://home.gwu.edu/~wpeng/Software.htm
R Studio	https://www.rstudio.com/products/RStudio/
BCHNV software	Berkley Gryder, Oncogenomics Section, NCI CCR NIH
COLTRON software	Berkley Gryder, Oncogenomics Section, NCI CCR NIH
HOMER	http://homer.ucsd.edu/homer/motif/
GraphPad Prism 8.0.0	https://www.graphpad.com/scientific-software/prism/
BD FlowJo V10.6.1	https://www.flowjo.com/
ABI SDS 2.4	https://www.thermofisher.com/ch/en/home/technical-resources/software-downloads/applied-biosystems-7900ht-fast-real-timespcr-system.html
